# Supplementary material for: DNA Barcodes for the Northern European Tachinid Flies (Diptera: Tachinidae)
Source: PLoS One. 2016 Nov 4;11(11):e0164933. doi: 10.1371/journal.pone.0164933 (PMC5096672; doi:10.1371/journal.pone.0164933)
Supplement: S1 Table — The list includes also the failed specimens. Note that the taxonomy in BOLD follows O’Hara and Wood [45], treating Ramonda as the synonyme of Periscepsia. (XLSX) [file pone.0164933.s004.xlsx]

## Sheet: Lab Sheet
Project Code	Process ID	Sample ID	Field ID	BIN	Catalog Num	COI-5P Seq. Length	COI-5P Trace Count	COI-5P Accession	Image Count	Barcode Compliant	Contamination	Stop Codon	Flagged Record	Collection Date	Identification	Life Stage	Extra Info	Voucher Type	Institution	Notes
TACFI	DIFIA002-11	lampe00002	lampe00002	BOLD:AAV7115	lampe00002	658[0n]	2	JN298623	1					2010-07-24	Eriothrix rufomaculatus	A			Research Collection of Petri Lampila
TACFI	DIFIA003-11	lampe00003	lampe00003	BOLD:AAV7115	lampe00003	658[0n]	2	JN298624	1					2010-07-17	Eriothrix rufomaculatus	A			Research Collection of Petri Lampila
TACFI	DIFIA004-11	lampe00004	lampe00004	BOLD:AAY2346	lampe00004	658[0n]	2		1					2010-06-09	Gonia ornata	A			Research Collection of Petri Lampila
TACFI	DIFIA005-11	lampe00005	lampe00005	BOLD:ACO3996	lampe00005	658[0n]	2		1					2010-07-17	Gymnosoma nudifrons	A			Research Collection of Petri Lampila
TACFI	DIFIA006-11	lampe00006	lampe00006	BOLD:AAV6797	lampe00006	658[0n]	2	JN298625	1					2010-07-12	Dinera ferina	A			Research Collection of Petri Lampila
TACFI	DIFIA007-11	lampe00007	lampe00007	BOLD:AAV7830	lampe00007	658[0n]	2	JN298626	1					2010-07-24	Leskia aurea	A			Research Collection of Petri Lampila
TACFI	DIFIA008-11	lampe00008	lampe00008	BOLD:AAV9844	lampe00008	658[0n]	2	JN285983	1					2010-05-22	Appendicia truncata	A			Research Collection of Petri Lampila
TACFI	DIFIA009-11	lampe00009	lampe00009	BOLD:ABW2498	lampe00009	658[0n]	2	JN298627	1					2010-07-17	Tachina fera	A			Research Collection of Petri Lampila
TACFI	DIFIA010-11	lampe00010	lampe00010	BOLD:ACO3985	lampe00010	658[0n]	2	JN298628	1					2010-06-21	Voria ruralis	A			Research Collection of Petri Lampila
TACFI	DIFIA092-11	lampe00092	lampe00092	BOLD:AAV0907	lampe00092	658[0n]	2	JN298651						2010-05-19	Macquartia dispar	A			Research Collection of Petri Lampila
TACFI	DIFIA093-11	lampe00093	lampe00093	BOLD:AAV0908	lampe00093	658[0n]	2	JN298652						2010-06-15	Oswaldia muscaria	A			Research Collection of Petri Lampila
TACFI	DIFIA094-11	lampe00094	lampe00094	BOLD:AAP8652	lampe00094	658[0n]	2	JN298653						2010-07-17	Belida angelicae	A			Research Collection of Petri Lampila
TACFI	DIFIA095-11	lampe00095	lampe00095	BOLD:AAU3835	lampe00095	658[0n]	2	JN298654						2010-06-29	Trixa conspersa	A			Research Collection of Petri Lampila
TACFI	TACFI001-11	JP00001	JP00001	BOLD:AAX7560	JP00001	658[0n]	2								Eliozeta pellucens	A			Tampere Museum of Natural History	11.-23.6.2006
TACFI	TACFI002-11	JP00002	JP00002	BOLD:AAV8345	JP00002	658[1n]	2	JN310365						2005-07-30	Subclytia rotundiventris	A			Tampere Museum of Natural History
TACFI	TACFI003-11	JP00003	JP00003		JP00003	0[n]	2							1999-08-04	Gymnosoma clavatum	A			Tampere Museum of Natural History	Ch. Bergstroem det. no 970
TACFI	TACFI004-11	JP00004	JP00004		JP00004	0[n]	2							2007-09-30	Gymnosoma dolycoridis	A			Tampere Museum of Natural History
TACFI	TACFI005-11	JP00005	JP00005		JP00005	0[n]	2							2004-08-06	Gymnosoma nudifrons	A			Tampere Museum of Natural History
TACFI	TACFI006-11	JP00006	JP00006	BOLD:AAV9222	JP00006	658[0n]	2	JN310366						2006-07-23	Cistogaster globosa	A			Tampere Museum of Natural History
TACFI	TACFI007-11	JP00007	JP00007	BOLD:AAY2270	JP00007	658[0n]	2								Phasia pusilla	A			Tampere Museum of Natural History	17.5.-19.6.2008
TACFI	TACFI008-11	JP00008	JP00008	BOLD:AAY2262	JP00008	658[0n]	2							2010-09-11	Phasia aurigera	A			Tampere Museum of Natural History
TACFI	TACFI009-11	JP00009	JP00009	BOLD:AAG2311	JP00009	658[0n]	2	JN310367						2004-08-07	Phasia aurulans	A			Tampere Museum of Natural History
TACFI	TACFI010-11	JP00010	JP00010	BOLD:AAY2276	JP00010	658[0n]	2							2007-06-03	Phasia hemiptera	A			Tampere Museum of Natural History
TACFI	TACFI011-11	JP00011	JP00011	BOLD:AAG2311	JP00011	658[0n]	2	JN310368						2005-08-14	Phasia obesa	A			Tampere Museum of Natural History
TACFI	TACFI012-11	JP00012	JP00012	BOLD:AAY2258	JP00012	658[0n]	2								Phasia barbifrons	A			Tampere Museum of Natural History	July 2008
TACFI	TACFI013-11	JP00013	JP00013	BOLD:AAY2271	JP00013	658[0n]	2								Phasia subcoleoptrata	A			Tampere Museum of Natural History	8.-31.5.2006
TACFI	TACFI014-11	JP00014	JP00014	BOLD:AAW4146	JP00014	658[0n]	2							2007-05-26	Catharosia pygmaea	A			Tampere Museum of Natural History
TACFI	TACFI015-11	JP00015	JP00015	BOLD:AAV9221	JP00015	541[1n]	2								Cinochira atra	A			Tampere Museum of Natural History	xx-9.9.2007
TACFI	TACFI016-11	JP00016	JP00016	BOLD:AAX6668	JP00016	658[0n]	2							2007-07-17	Lophosia fasciata	A			Tampere Museum of Natural History
TACFI	TACFI017-11	JP00017	JP00017	BOLD:AAV9203	JP00017	658[0n]	2	JN310369						2010-09-11	Cylindromyia auriceps	A			Tampere Museum of Natural History
TACFI	TACFI018-11	JP00018	JP00018	BOLD:AAN3295	JP00018	658[0n]	2								Cylindromyia bicolor	A			Tampere Museum of Natural History	11.-23.6.2006
TACFI	TACFI019-11	JP00019	JP00019	BOLD:AAV9202	JP00019	658[0n]	2	JN310370						2005-07-30	Cylindromyia brassicaria	A			Tampere Museum of Natural History
TACFI	TACFI020-11	JP00020	JP00020	BOLD:AAG2144	JP00020	658[0n]	2	JN310371						2005-07-02	Cylindromyia interrupta	A			Tampere Museum of Natural History
TACFI	TACFI021-11	JP00021	JP00021	BOLD:AAV9204	JP00021	658[0n]	2	JN310372						2006-07-01	Cylindromyia pusilla	A			Tampere Museum of Natural History
TACFI	TACFI022-11	JP00022	JP00022	BOLD:AAG6981	JP00022	658[0n]	2	JN310373						2007-05-10	Besseria anthophila	A			Tampere Museum of Natural History
TACFI	TACFI023-11	JP00023	JP00023	BOLD:AAY2578	JP00023	658[0n]	2								Phania curvicauda	A			Tampere Museum of Natural History	11.-23.6.2006
TACFI	TACFI024-11	JP00024	JP00024	BOLD:ACO3978	JP00024	658[0n]	2							2010-07-17	Phania funesta	A			Tampere Museum of Natural History
TACFI	TACFI025-11	JP00025	JP00025	BOLD:AAY2580	JP00025	658[0n]	2							2006-07-06	Phania thoracica	A			Tampere Museum of Natural History
TACFI	TACFI026-11	JP00026	JP00026	BOLD:AAO0884	JP00026	658[0n]	2							2010-08-01	Ectophasia crassipennis	A			Tampere Museum of Natural History
TACFI	TACFI027-11	JP00027	JP00027	BOLD:AAG2163	JP00027	658[0n]	2	JN270389						2007-07-17	Exorista rustica	A			Tampere Museum of Natural History
TACFI	TACFI028-11	JP00028	JP00028		JP00028	0[n]	2								Exorista fasciata	A			Tampere Museum of Natural History	e.l. `D.selenitic.`, 1978
TACFI	TACFI029-11	JP00029	JP00029	BOLD:AAY4545	JP00029	658[0n]	2								Exorista grandis	A			Tampere Museum of Natural History	e.l. 1997
TACFI	TACFI030-11	JP00030	JP00030		JP00030	0[n]	2								Exorista grandis	A			Tampere Museum of Natural History	e.l. `S. pavonia`, 1944
TACFI	TACFI031-11	JP00031	JP00031	BOLD:AAE6621	JP00031	658[0n]	2								Exorista sorbillans	A			Tampere Museum of Natural History	e.l. `Hyles euphorbiae`
TACFI	TACFI032-11	JP00032	JP00032	BOLD:ACF6755	JP00032	658[0n]	6								Exorista deligata	A			Tampere Museum of Natural History	26.5.-17.6.2007
TACFI	TACFI033-11	JP00033	JP00033	BOLD:AAW3725	JP00033	658[0n]	2							2008-05-25	Chetogena tschorsnigi	A			Tampere Museum of Natural History
TACFI	TACFI034-11	JP00034	JP00034		JP00034	0[n]	2								Diplostichus janitrix	A			Tampere Museum of Natural History	e.l. `Diprion pini`,
TACFI	TACFI035-11	JP00035	JP00035	BOLD:ACO3995	JP00035	658[0n]	2							2005-06-19	Phorocera obscura	A			Tampere Museum of Natural History
TACFI	TACFI036-11	JP00036	JP00036	BOLD:AAW3422	JP00036	658[0n]	2							2007-06-21	Bessa selecta	A			Tampere Museum of Natural History
TACFI	TACFI037-11	JP00037	JP00037		JP00037	0[n]	2								Belida angelicae	A			Tampere Museum of Natural History	12.7.-7.8.2000
TACFI	TACFI038-11	JP00038	JP00038	BOLD:AAN9761	JP00038	658[0n]	2	JN310374						2005-06-19	Meigenia dorsalis	A			Tampere Museum of Natural History
TACFI	TACFI039-11	JP00039	JP00039	BOLD:AAN9761	JP00039	658[0n]	2	JN310375						2009-07-23	Meigenia mutabilis	A			Tampere Museum of Natural History
TACFI	TACFI040-11	JP00040	JP00040	BOLD:AAN9761	JP00040	658[0n]	2	JN310376						2010-09-11	Meigenia mutabilis	A			Tampere Museum of Natural History
TACFI	TACFI041-11	JP00041	JP00041	BOLD:AAV8535	JP00041	658[0n]	2	JN310377						2008-06-27	Zaira cinerea	A			Tampere Museum of Natural History
TACFI	TACFI042-11	JP00042	JP00042	BOLD:AAV8857	JP00042	658[0n]	2	JN310378						2007-07-17	Staurochaeta albocingulata	A			Tampere Museum of Natural History
TACFI	TACFI043-11	JP00043	JP00043	BOLD:AAX5469	JP00043	658[0n]	2							2010-07-18	Leiophora innoxia	A			Tampere Museum of Natural History
TACFI	TACFI044-11	JP00044	JP00044	BOLD:AAV9890	JP00044	658[0n]	2	JN310379						2006-07-20	Admontia blanda	A			Tampere Museum of Natural History
TACFI	TACFI045-11	JP00045	JP00045	BOLD:AAV9893	JP00045	658[0n]	2								Admontia grandicornis	A			Tampere Museum of Natural History	window trap 2005
TACFI	TACFI046-11	JP00046	JP00046		JP00046	0[n]	2								Oswaldia muscaria	A			Tampere Museum of Natural History	12.7.-2.8.2005
TACFI	TACFI047-11	JP00047	JP00047		JP00047	0[n]	2								Oswaldia eggeri	A			Tampere Museum of Natural History	19.6.-12.7.2005 det. C. Bergstroem
TACFI	TACFI048-11	JP00048	JP00048		JP00048	0[n]	2							2006-07-27	Oswaldia spectabilis	A			Tampere Museum of Natural History
TACFI	TACFI050-11	JP00050	JP00050	BOLD:AAV9705	JP00050	658[0n]	2	JN310380						2005-07-25	Aphria longirostris	A			Tampere Museum of Natural History
TACFI	TACFI051-11	JP00051	JP00051	BOLD:AAV9145	JP00051	658[0n]	2	JN310381						2007-08-10	Demoticus plebejus	A			Tampere Museum of Natural History
TACFI	TACFI052-11	JP00052	JP00052	BOLD:AAV7830	JP00052	658[0n]	2	JN310382						2007-07-01	Leskia aurea	A			Tampere Museum of Natural History
TACFI	TACFI053-11	JP00053	JP00053	BOLD:AAV8821	JP00053	658[0n]	2	JN310383						2006-07-23	Solieria pacifica	A			Tampere Museum of Natural History
TACFI	TACFI054-11	JP00054	JP00054	BOLD:AAV8821	JP00054	658[0n]	2	JN310384						2003-08-17	Solieria pacifica	A			Tampere Museum of Natural History
TACFI	TACFI055-11	JP00055	JP00055	BOLD:AAX3938	JP00055	658[0n]	2							2010-08-05	Mintho rufiventris	A			Tampere Museum of Natural History
TACFI	TACFI056-11	JP00056	JP00056	BOLD:AAX3942	JP00056	658[0n]	2								Minthodes picta	A			Tampere Museum of Natural History	24.7.-3.9.2007
TACFI	TACFI057-11	JP00057	JP00057	BOLD:AAV9174	JP00057	658[0n]	2	JN310385						2007-07-30	Dexiosoma caninum	A			Tampere Museum of Natural History
TACFI	TACFI058-11	JP00058	JP00058	BOLD:AAU3835	JP00058	658[0n]	2								Trixa conspersa	A			Tampere Museum of Natural History	::taxonomy:Dark form::endTaxonomy:28.7.-13.8.2005
TACFI	TACFI059-11	JP00059	JP00059	BOLD:AAU3835	JP00059	658[0n]	2	JN310386						2006-08-05	Trixa conspersa	A			Tampere Museum of Natural History	::taxonomy:Dark form::endTaxonomy:
TACFI	TACFI060-11	JP00060	JP00060	BOLD:AAU3835	JP00060	658[0n]	2	JN310387						2009-08-07	Trixa conspersa	A			Tampere Museum of Natural History	::taxonomy:dark form::endTaxonomy:
TACFI	TACFI061-11	JP00061	JP00061	BOLD:AAU3837	JP00061	658[0n]	2	JN310388						2004-06-13	Trixa caerulescens	A			Tampere Museum of Natural History
TACFI	TACFI062-11	JP00062	JP00062	BOLD:AAU3837	JP00062	658[0n]	2	JN310389						2005-06-13	Trixa caerulescens	A			Tampere Museum of Natural History
TACFI	TACFI063-11	JP00063	JP00063	BOLD:AAU3837	JP00063	658[0n]	2								Trixa caerulescens	A			Tampere Museum of Natural History	16.6.-12.7.2005
TACFI	TACFI064-11	JP00064	JP00064	BOLD:AAU3835	JP00064	658[0n]	2	JN310390						2004-08-01	Trixa conspersa	A			Tampere Museum of Natural History
TACFI	TACFI065-11	JP00065	JP00065	BOLD:AAU3835	JP00065	658[0n]	2	JN310391						2006-07-06	Trixa conspersa	A			Tampere Museum of Natural History
TACFI	TACFI066-11	JP00066	JP00066		JP00066	416[0n]	2							2004-07-26	Trixa conspersa	A			Tampere Museum of Natural History
TACFI	TACFI067-11	JP00067	JP00067	BOLD:AAN4006	JP00067	658[0n]	2								Billaea irrorata	A			Tampere Museum of Natural History	e.l. `Saperda populnea`, 2004
TACFI	TACFI068-11	JP00068	JP00068	BOLD:AAW3521	JP00068	658[0n]	2							2010-07-23	Billaea kolomyetzi	A			Tampere Museum of Natural History	JF10-5248
TACFI	TACFI069-11	JP00069	JP00069	BOLD:AAW3520	JP00069	658[0n]	2								Billaea triangulifera	A			Tampere Museum of Natural History	window trap 2005
TACFI	TACFI070-11	JP00070	JP00070	BOLD:AAX9602	JP00070	658[0n]	2								Dinera nr. fuscata	A			Tampere Museum of Natural History	July 2008
TACFI	TACFI071-11	JP00071	JP00071	BOLD:AAV6797	JP00071	658[0n]	2	JN310392						2005-07-30	Dinera ferina	A			Tampere Museum of Natural History
TACFI	TACFI072-11	JP00072	JP00072	BOLD:AAZ3904	JP00072	472[1n]	2							2007-07-02	Dinera grisescens	A			Tampere Museum of Natural History
TACFI	TACFI073-11	JP00073	JP00073	BOLD:AAX7871	JP00073	658[0n]	2							2006-07-23	Prosena siberita	A			Tampere Museum of Natural History
TACFI	TACFI074-11	JP00074	JP00074	BOLD:AAV7115	JP00074	658[0n]	2	JN310393						2005-07-30	Eriothrix rufomaculatus	A			Tampere Museum of Natural History
TACFI	TACFI075-11	JP00075	JP00075	BOLD:AAV8581	JP00075	658[0n]	2	JN310394						2008-07-20	Trafoia monticola	A			Tampere Museum of Natural History
TACFI	TACFI076-11	JP00076	JP00076	BOLD:AAW8285	JP00076	658[0n]	2							2006-04-30	Campylocheta fuscinervis	A			Tampere Museum of Natural History
TACFI	TACFI077-11	JP00077	JP00077		JP00077	0[n]	2								Campylocheta inepta	A			Tampere Museum of Natural History	25.5.-30.6.2008
TACFI	TACFI078-11	JP00078	JP00078	BOLD:AAW8288	JP00078	658[0n]	2							2007-05-12	Campylocheta praecox	A			Tampere Museum of Natural History
TACFI	TACFI079-11	JP00079	JP00079	BOLD:ABZ2498	JP00079	658[0n]	2								Blepharomyia pagana	A			Tampere Museum of Natural History	17.5.-16.6.2008
TACFI	TACFI080-11	JP00080	JP00080	BOLD:AAY0455	JP00080	619[0n]	2							2006-07-23	Periscepsia prunaria	A			Tampere Museum of Natural History
TACFI	TACFI081-11	JP00081	JP00081	BOLD:AAY0450	JP00081	658[0n]	2								Periscepsia ringdahli	A			Tampere Museum of Natural History	e.p. `Noctuidae`, 9.-12.5.2007
TACFI	TACFI082-11	JP00082	JP00082	BOLD:AAY0449	JP00082	658[0n]	2							2001-06-03	Periscepsia spathulata	A			Tampere Museum of Natural History	det. C. Bergstroem, 1119
TACFI	TACFI083-11	JP00083	JP00083	BOLD:AAW7715	JP00083	658[0n]	2	JN310395						2007-08-06	Wagneria alpina	A			Tampere Museum of Natural History
TACFI	TACFI084-11	JP00084	JP00084	BOLD:ACO3987	JP00084	658[0n]	2	JN310396						2005-06-19	Wagneria costata	A			Tampere Museum of Natural History
TACFI	TACFI085-11	JP00085	JP00085	BOLD:ACO3985	JP00085	658[0n]	2	JN310397						2005-07-03	Voria ruralis	A			Tampere Museum of Natural History
TACFI	TACFI086-11	JP00086	JP00086		JP00086	256[0n]	2							2006-07-06	Cyrtophleba ruricola	A			Tampere Museum of Natural History
TACFI	TACFI087-11	JP00087	JP00087	BOLD:AAP3780	JP00087	658[0n]	2	JN310398						2005-05-14	Cyrtophleba vernalis	A			Tampere Museum of Natural History
TACFI	TACFI088-11	JP00088	JP00088	BOLD:AAY1554	JP00088	658[0n]	2							1999-07-11	Phyllomya volvulus	A			Tampere Museum of Natural History
TACFI	TACFI089-11	JP00089	JP00089		JP00089	0[n]	2							2005-07-27	Thelaira nigrina	A			Tampere Museum of Natural History
TACFI	TACFI090-11	JP00090	JP00090	BOLD:AAY0214	JP00090	658[0n]	2							2009-06-27	Dufouria chalybeata	A			Tampere Museum of Natural History
TACFI	TACFI091-11	JP00091	JP00091	BOLD:AAY0209	JP00091	658[0n]	2							2004-07-14	Loewia erecta	A			Tampere Museum of Natural History
TACFI	TACFI092-11	JP00092	JP00092		JP00092	0[n]	2								Rondania dimidiata	A			Tampere Museum of Natural History	12.7.-7.8.2000
TACFI	TACFI093-11	JP00093	JP00093		JP00093	0[n]	2								Rondania fasciata	A			Tampere Museum of Natural History	e.l. 2010
TACFI	TACFI094-11	JP00094	JP00094	BOLD:AAX4213	JP00094	658[1n]	2								Microsoma exiguum	A			Tampere Museum of Natural History	xx-9.9.2007
TACFI	TACFI095-11	JP00095	JP00095	BOLD:AAY3979	JP00095	658[0n]	2							2007-06-08	Freraea gagatea	A			Tampere Museum of Natural History
TACFI	FIDIP184-11	MZH_HP.184	MZH_HP.184	BOLD:ABY5409	MZH_HP.184	658[0n]	2		1					2011-07-01	Nowickia marklini	A	aHa11-002952		Finnish Museum of Natural History, Zoological Museum	http://id.luomus.fi/HP.184
TACFI	FIDIP196-11	MZH_HP.196	MZH_HP.196	BOLD:AAU3837	MZH_HP.196	658[0n]	2		2					2011-06-30	Trixa caerulescens	A	aHa11-002949		Finnish Museum of Natural History, Zoological Museum	http://id.luomus.fi/HP.196
TACFI	FIDIP197-11	MZH_HP.197	MZH_HP.197	BOLD:AAU3835	MZH_HP.197	658[0n]	2		2					2011-01-07	Trixa conspersa	A	aHa11-002951		Finnish Museum of Natural History, Zoological Museum	http://id.luomus.fi/HP.197
TACFI	FIDIP198-11	MZH_HP.198	MZH_HP.198	BOLD:ACO3977	MZH_HP.198	658[0n]	2		2					2011-04-06	Panzeria rudis	A	aHa11-002742		Finnish Museum of Natural History, Zoological Museum	http://id.luomus.fi/HP.198
TACFI	FIDIP199-11	MZH_HP.199	MZH_HP.199	BOLD:ACO3977	MZH_HP.199	658[0n]	2		2					2011-04-06	Panzeria rudis	A	aHa11-002743		Finnish Museum of Natural History, Zoological Museum	http://id.luomus.fi/HP.199
TACFI	FIDIP200-11	MZH_HP.200	MZH_HP.200	BOLD:ACO3996	MZH_HP.200	658[0n]	2		2					2011-06-11	Gymnosoma nudifrons	A	aHa11-002753		Finnish Museum of Natural History, Zoological Museum	http://id.luomus.fi/HP.200
TACFI	FIDIP244-11	MZH_HP.244	MZH_HP.244	BOLD:ABV4519	MZH_HP.244	658[0n]	2		2					2011-05-29	Smidtia conspersa	A	aHa11-002711		Finnish Museum of Natural History, Zoological Museum	http://id.luomus.fi/HP.244
TACFI	FIDIP245-11	MZH_HP.245	MZH_HP.245	BOLD:ACO3995	MZH_HP.245	633[0n]	2		2					2011-05-29	Phorocera obscura	A	aHa11-002712		Finnish Museum of Natural History, Zoological Museum	http://id.luomus.fi/HP.245
TACFI	FIDIP246-11	MZH_HP.246	MZH_HP.246	BOLD:ABV4494	MZH_HP.246	658[0n]	2		2					2011-05-29	Pelatachina tibialis	A	aHa11-002713		Finnish Museum of Natural History, Zoological Museum	http://id.luomus.fi/HP.246
TACFI	FIDIP257-11	MZH_HP.257	MZH_HP.257	BOLD:ACO3995	MZH_HP.257	658[0n]	2		2					2001-05-21	Phorocera obscura	A	aHa11-002585		Finnish Museum of Natural History, Zoological Museum	http://id.luomus.fi/HP.257
TACFI	FIDIP259-11	MZH_HP.259	MZH_HP.259	BOLD:ABV4561	MZH_HP.259	658[0n]	2		2					2011-05-29	Actia lamia	A	aHa11-002709		Finnish Museum of Natural History, Zoological Museum	http://id.luomus.fi/HP.259
TACFI	FIDIP282-11	MZH_HP.282	MZH_HP.282	BOLD:AAU3837	MZH_HP.282	658[0n]	2		2					2011-06-29	Trixa caerulescens	A	aHa11-003031		Finnish Museum of Natural History, Zoological Museum	http://id.luomus.fi/HP.282
TACFI	FIDIP324-11	MZH_HP.324	MZH_HP.324	BOLD:AAV9204	MZH_HP.324	658[0n]	2		1					2011-09-08	Cylindromyia pusilla	A	aHa11-003090		Finnish Museum of Natural History, Zoological Museum	http://id.luomus.fi/HP.324
TACFI	FIDIP338-11	MZH_HP.338	MZH_HP.338	BOLD:AAX6668	MZH_HP.338	658[1n]	2		1					2011-07-14	Lophosia fasciata	A	aHa11-003098		Finnish Museum of Natural History, Zoological Museum	http://id.luomus.fi/HP.338
TACFI	FIDIP339-11	MZH_HP.339	MZH_HP.339	BOLD:ACO3977	MZH_HP.339	658[0n]	6		1					2011-07-14	Panzeria rudis	A	aHa11-003102		Finnish Museum of Natural History, Zoological Museum	http://id.luomus.fi/HP.339
TACFI	FIDIP347-11	MZH_HP.347	MZH_HP.347	BOLD:ACO3996	MZH_HP.347	658[0n]	2		1					2011-10-07	Gymnosoma nudifrons	A	aHa11-003127		Finnish Museum of Natural History, Zoological Museum	http://id.luomus.fi/HP.347
TACFI	FIDIP358-11	MZH_HP.358	MZH_HP.358	BOLD:ABW0151	MZH_HP.358	658[0n]	2		1					2011-07-18	Allophorocera ferruginea	A	aHa11-003177		Finnish Museum of Natural History, Zoological Museum	http://id.luomus.fi/HP.358
TACFI	FIDIP359-11	MZH_HP.359	MZH_HP.359	BOLD:AAN4017	MZH_HP.359	658[0n]	2		1					2011-07-18	Pales pavida	A	aHa11-003176		Finnish Museum of Natural History, Zoological Museum	http://id.luomus.fi/HP.359
TACFI	FIDIP360-11	MZH_HP.360	MZH_HP.360	BOLD:AAV6797	MZH_HP.360	658[0n]	2		1					2011-07-18	Dinera ferina	A	aHa11-003175		Finnish Museum of Natural History, Zoological Museum	http://id.luomus.fi/HP.360
TACFI	FIDIP362-11	MZH_HP.362	MZH_HP.362	BOLD:ABW0151	MZH_HP.362	658[0n]	2		1					2011-07-18	Allophorocera ferruginea	A	aHa11-003185		Finnish Museum of Natural History, Zoological Museum	http://id.luomus.fi/HP.362
TACFI	FIDIP363-11	MZH_HP.363	MZH_HP.363	BOLD:ABW0151	MZH_HP.363	658[0n]	2		1					2011-07-18	Allophorocera ferruginea	A	aHa11-003186		Finnish Museum of Natural History, Zoological Museum	http://id.luomus.fi/HP.363
TACFI	FIDIP374-11	MZH_HP.374	MZH_HP.374	BOLD:ACO3996	MZH_HP.374	658[0n]	2		1					2011-07-18	Gymnosoma nudifrons	A	aHa11-003178		Finnish Museum of Natural History, Zoological Museum	http://id.luomus.fi/HP.374
TACFI	FIDIP375-11	MZH_HP.375	MZH_HP.375	BOLD:ABW1716	MZH_HP.375	658[0n]	6		1					2011-07-18	Tlephusa cincinna	A	aHa11-003180		Finnish Museum of Natural History, Zoological Museum	http://id.luomus.fi/HP.375
TACFI	FIDIP376-11	MZH_HP.376	MZH_HP.376	BOLD:ACE5781	MZH_HP.376	658[0n]	2		1					2011-07-18	Aplomya confinis	A	aHa11-003181		Finnish Museum of Natural History, Zoological Museum	http://id.luomus.fi/HP.376
TACFI	FIDIP378-11	MZH_HP.378	MZH_HP.378	BOLD:ABW1716	MZH_HP.378	658[0n]	2		1					2011-07-18	Tlephusa cincinna	A	aHa11-003197		Finnish Museum of Natural History, Zoological Museum	http://id.luomus.fi/HP.378
TACFI	FIDIP379-11	MZH_HP.379	MZH_HP.379	BOLD:ACE5781	MZH_HP.379	658[0n]	2		1					2011-07-18	Aplomya confinis	A	aHa11-003198		Finnish Museum of Natural History, Zoological Museum	http://id.luomus.fi/HP.379
TACFI	FIDIP380-11	MZH_HP.380	MZH_HP.380	BOLD:ABW0151	MZH_HP.380	658[0n]	2		1					2011-07-18	Allophorocera ferruginea	A	aHa11-003187		Finnish Museum of Natural History, Zoological Museum	http://id.luomus.fi/HP.380
TACFI	FIDIP381-11	MZH_HP.381	MZH_HP.381	BOLD:ABW4362	MZH_HP.381	658[0n]	2		1					2011-07-18	Frontina laeta	A	aHa11-003183		Finnish Museum of Natural History, Zoological Museum	http://id.luomus.fi/HP.381
TACFI	FIDIP382-11	MZH_HP.382	MZH_HP.382	BOLD:ABW4362	MZH_HP.382	658[0n]	2		1					2011-07-18	Frontina laeta	A	aHa11-003184		Finnish Museum of Natural History, Zoological Museum	http://id.luomus.fi/HP.382
TACFI	FIDIP383-11	MZH_HP.383	MZH_HP.383	BOLD:ABW4375	MZH_HP.383	658[0n]	2		1					2011-07-18	Eurithia anthophila	A	aHa11-003189		Finnish Museum of Natural History, Zoological Museum	http://id.luomus.fi/HP.383
TACFI	FIDIP384-11	MZH_HP.384	MZH_HP.384	BOLD:ABW4375	MZH_HP.384	658[0n]	2		1					2011-07-18	Eurithia anthophila	A	aHa11-003190		Finnish Museum of Natural History, Zoological Museum	http://id.luomus.fi/HP.384
TACFI	FIDIP385-11	MZH_HP.385	MZH_HP.385	BOLD:ABW4998	MZH_HP.385	658[0n]	2		1					2011-07-18	Loewia foeda	A	aHa11-003199		Finnish Museum of Natural History, Zoological Museum	http://id.luomus.fi/HP.385
TACFI	FIDIP386-11	MZH_HP.386	MZH_HP.386	BOLD:ACO3996	MZH_HP.386	658[0n]	2		1					2011-07-18	Gymnosoma nudifrons	A	aHa11-003188		Finnish Museum of Natural History, Zoological Museum	http://id.luomus.fi/HP.386
TACFI	FIDIP407-11	MZH_HP.407	MZH_HP.407		MZH_HP.407	307[0n]	6		1					2011-06-27	Medina	A	aHa11-003228		Finnish Museum of Natural History, Zoological Museum	http://id.luomus.fi/HP.407
TACFI	FIDIP445-11	MZH_HP.445	MZH_HP.445	BOLD:AAV9174	MZH_HP.445	658[0n]	2		1					2011-06-26	Dexiosoma caninum	A	aHa11-003305		Finnish Museum of Natural History, Zoological Museum	http://id.luomus.fi/HP.445
TACFI	FIDIP492-11	MHZ_HP.492	MHZ_HP.492	BOLD:AAV9222	MHZ_HP.492	658[0n]	2		1					2011-07-26	Cistogaster globosa	A	aHa11-003454		Finnish Museum of Natural History, Zoological Museum	http://id.luomus.fi/HP.492
TACFI	FIDIP493-11	MHZ_HP.493	MHZ_HP.493	BOLD:AAV7115	MHZ_HP.493	658[0n]	2		1					2011-07-26	Eriothrix rufomaculatus	A	aHa11-003453		Finnish Museum of Natural History, Zoological Museum	http://id.luomus.fi/HP.493
TACFI	FIDIP536-11	MHZ_HP.536	MHZ_HP.536	BOLD:AAG2163	MHZ_HP.536	658[0n]	2		1					2011-06-29	Exorista rustica	A	aHa11-003533		Finnish Museum of Natural History, Zoological Museum	http://id.luomus.fi/HP.536
TACFI	FIDIP622-12	MZH_GV.3474	jka11-00136	BOLD:AAG6902	MZH_GV.3474	658[0n]	2							2011-06-11	Medina separata	A	MZH_GV.3474		University of Helsinki
TACFI	FIDIP660-12	MZH_GV.3512	jka11-02352	BOLD:ACZ8982	MZH_GV.3512	658[0n]	2							2011-06-11	Phryxe magnicornis	A	MZH_GV.3512		University of Helsinki
TACFI	FIDIP767-12	MZH_GV.3205	jka11-02202	BOLD:AAY0449		658[0n]	2							2010-06-04	Periscepsia spathulata	A	http://id.luomus.fi/GV.3205		University of Helsinki	A3(I)A4: On Sorbus sorbifolia
TACFI	FIDIP779-12	MZH_GV.3217	jka11-02217	BOLD:AAV9221		658[0n]	2							2010-08-03	Cinochira atra	A	http://id.luomus.fi/GV.3217		University of Helsinki	Vr3A3: On Sorbus sorbifolia: Period: Aug-03-2010 - Aug-05-2010
TACFI	FIDIP795-12	MZH_GV.3233	jka11-02236	BOLD:AAY3979		658[0n]	2							2011-08-08	Freraea gagatea	A	http://id.luomus.fi/GV.3233		University of Helsinki	`Frerea gagatea` on label: Sor7B: On Sorbaria: Period: Aug-08-2011 - Aug-15-2011
TACFI	FIDIP839-12	MZH_GV.3277	jka11-02267	BOLD:AAV9844		658[0n]	2							2011-05-29	Appendicia truncata	A	http://id.luomus.fi/GV.3277		University of Helsinki
TACFI	FIDIP840-12	MZH_GV.3278	jka11-02277	BOLD:ABZ7811		658[0n]	2							2011-05-29	Winthemia quadripustulata	A	http://id.luomus.fi/GV.3278		University of Helsinki	`Wintemia quadripustulata` on label
TACFI	FIDIP841-12	MZH_GV.3279	jka11-02280	BOLD:AAV0907		658[0n]	2							2011-05-29	Macquartia viridana	A	http://id.luomus.fi/GV.3279		University of Helsinki
TACFI	FIDIP842-12	MZH_GV.3280	jka11-02257	BOLD:ACO3981		658[0n]	2							2011-05-29	Actia pilipennis	A	http://id.luomus.fi/GV.3280		University of Helsinki
TACFI	FIDIP843-12	MZH_GV.3281	jka11-02254	BOLD:AAF6259		658[0n]	2							2011-05-29	Lypha dubia	A	http://id.luomus.fi/GV.3281		University of Helsinki
TACFI	FIDIP844-12	jka11-02259	jka11-02259	BOLD:ACB3639	jka11-02259	658[0n]	2							2011-05-29	Ceromya bicolor	A	jka11-02259		Personal Collection of J. Kahanpaeae
TACFI	FIDIP873-12	MZH_HP.588	MZH_HP.588	BOLD:AAY0209	MZH_HP.588	658[0n]	2		1					2011-06-29	Loewia erecta	A	aHa11-003714		Finnish Museum of Natural History, Zoological Museum	http://id.luomus.fi/HP.588
TACFI	FIDIP874-12	MZH_HP.589	MZH_HP.589	BOLD:ABX1738	MZH_HP.589	658[0n]	2		1					2011-06-29	Hyalurgus lucidus	A	aHa11-003706		Finnish Museum of Natural History, Zoological Museum	http://id.luomus.fi/HP.589
TACFI	FIDIP875-12	MZH_HP.590	MZH_HP.590	BOLD:ABX1426	MZH_HP.590	658[0n]	2		1					2011-06-29	Hyalurgus crucigerus	A	aHa11-003708		Finnish Museum of Natural History, Zoological Museum	http://id.luomus.fi/HP.590
TACFI	FIDIP876-12	MZH_HP.591	MZH_HP.591	BOLD:ABX1426	MZH_HP.591	658[0n]	2		1					2011-06-29	Hyalurgus crucigerus	A	aHa11-003710		Finnish Museum of Natural History, Zoological Museum	http://id.luomus.fi/HP.591
TACFI	FIDIP877-12	MZH_HP.592	MZH_HP.592	BOLD:AAG2163	MZH_HP.592	658[0n]	2		1					2011-06-29	Exorista rustica	A	aHa11-003711		Finnish Museum of Natural History, Zoological Museum	http://id.luomus.fi/HP.592
TACFI	FIDIP878-12	MZH_HP.593	MZH_HP.593	BOLD:AAG2163	MZH_HP.593	658[0n]	2		1					2011-06-29	Exorista rustica	A	aHa11-003712		Finnish Museum of Natural History, Zoological Museum	http://id.luomus.fi/HP.593
TACFI	FIDIP957-12	MZH_HP.751	MZH_HP.751	BOLD:ABV4494	MZH_HP.751	658[0n]	2		1					2011-11-06	Pelatachina tibialis	A	jka11-00075		Finnish Museum of Natural History, Zoological Museum	http://id.luomus.fi/HP.751
TACFI	FIDIP1024-12	MZH_HP.818	MZH_HP.818	BOLD:AAV9174	MZH_HP.818	658[0n]	2		1					2011-06-24	Dexiosoma caninum	A	jka11-00327		Finnish Museum of Natural History, Zoological Museum	http://id.luomus.fi/HP.818
TACFI	FIDIP1131-12	MZH_HP.925	MZH_HP.925		MZH_HP.925	0[n]	2		1					2011-06-28	Zophomyia temula	A	jka11-00528		Finnish Museum of Natural History, Zoological Museum	http://id.luomus.fi/HP.925
TACFI	TACFI096-12	JP00201		BOLD:ABW2498	JP00201	658[0n]	2	KU146897	1					2007-06-29	Tachina fera	A			Tampere Museum of Natural History	Period: Jun-29-2007 - Jul-12-2007
TACFI	TACFI097-12	JP00202		BOLD:ACA9912	JP00202	658[0n]	2	KU146899	1					2001-07-23	Tachina grossa	A			Tampere Museum of Natural History
TACFI	TACFI098-12	JP00203		BOLD:AAN9512	JP00203	658[0n]	2	KU146909	1					2010-09-11	Tachina magnicornis	A			Tampere Museum of Natural History
TACFI	TACFI099-12	JP00204		BOLD:ABW2498	JP00204	658[0n]	2		1					2010-09-01	Tachina fera	A			Tampere Museum of Natural History	ex larva
TACFI	TACFI100-12	JP00205		BOLD:ACB0179	JP00205	658[0n]	2	KU146922	1					2005-04-25	Tachina ursina	A			Tampere Museum of Natural History
TACFI	TACFI101-12	JP00206		BOLD:ACB0177	JP00206	658[0n]	2	KU146914	1					2000-05-01	Tachina canariensis	A			Tampere Museum of Natural History	1000 m.
TACFI	TACFI102-12	JP00207		BOLD:ACA9827	JP00207	658[0n]	2	KU146904	1					2006-05-15	Tachina lurida	A			Tampere Museum of Natural History
TACFI	TACFI103-12	JP00208		BOLD:ABY5409	JP00208	658[0n]	2	KU146924	1					2004-07-08	Nowickia alpina	A			Tampere Museum of Natural History	Period: Jul-08-2004 - Jul-09-2004
TACFI	TACFI104-12	JP00209		BOLD:ABY5409	JP00209	658[0n]	2	KU146906	1					2005-07-25	Nowickia marklini	A			Tampere Museum of Natural History
TACFI	TACFI105-12	JP00210		BOLD:AAZ5252	JP00210	658[0n]	2	KU146902	1					2011-07-06	Peleteria prompta	A			Tampere Museum of Natural History
TACFI	TACFI106-12	JP00211		BOLD:AAZ5252	JP00211	658[0n]	2	KU146907	1					2000-07-14	Peleteria rubescens	A			Tampere Museum of Natural History
TACFI	TACFI107-12	JP00212		BOLD:ACB2069	JP00212	658[1n]	2	KU146898	1					2009-07-02	Peleteria ruficornis	A			Tampere Museum of Natural History
TACFI	TACFI108-12	JP00213		BOLD:AAN3557	JP00213	658[0n]	2	KU146911	1					2011-08-07	Linnaemya picta	A			Tampere Museum of Natural History
TACFI	TACFI109-12	JP00214		BOLD:AAZ3879	JP00214	658[0n]	2	KU146918	1					2010-08-07	Linnaemya tessellans	A			Tampere Museum of Natural History	`Linneamya tesselans` on label
TACFI	TACFI110-12	JP00215		BOLD:ACB0050	JP00215	658[1n]	2	KU146903	1					2007-07-12	Linnaemya vulpina	A			Tampere Museum of Natural History	Period: Jul-12-2007 - Jul-29-2007
TACFI	TACFI111-12	JP00216		BOLD:ACA9918	JP00216	658[0n]	2		1					1998-07-28	Chrysosomopsis aurata	A			Tampere Museum of Natural History	`*685` on separate small yellow label
TACFI	TACFI112-12	JP00217		BOLD:ABY5280	JP00217	658[0n]	2	KU146912	1					2005-01-01	Lydina aenea	A			Tampere Museum of Natural History	window trap
TACFI	TACFI113-12	JP00218		BOLD:AAF6259	JP00218	658[0n]	2	KU146908	1					2005-06-13	Lypha dubia	A			Tampere Museum of Natural History
TACFI	TACFI114-12	JP00219		BOLD:ACA9902	JP00219	658[0n]	2		1					2007-07-29	Lypha ruficauda	A			Tampere Museum of Natural History
TACFI	TACFI115-12	JP00220			JP00220	0[n]	2		1					2001-07-14	Panzeria rudis	A			Tampere Museum of Natural History
TACFI	TACFI116-12	JP00221		BOLD:ACB0135	JP00221	658[0n]	2		1					2006-04-29	Panzeria puparum	A			Tampere Museum of Natural History
TACFI	TACFI117-12	JP00222			JP00222	522[15n]	2		1					2009-04-26	Panzeria vagans	A			Tampere Museum of Natural History
TACFI	TACFI118-12	JP00223		BOLD:AAV9844	JP00223	658[0n]	2		1					2008-05-07	Appendicia truncata	A			Tampere Museum of Natural History	Period: May-07-2008 - Jun-06-2008
TACFI	TACFI119-12	JP00224		BOLD:ABW4375	JP00224	658[0n]	2		1					2004-08-21	Eurithia anthophila	A			Tampere Museum of Natural History
TACFI	TACFI120-12	JP00225		BOLD:ABY1135	JP00225	658[0n]	2		1					2005-07-30	Eurithia connivens	A			Tampere Museum of Natural History
TACFI	TACFI121-12	JP00226		BOLD:ABY1135	JP00226	658[1n]	2		1					2006-07-15	Eurithia connivens	A			Tampere Museum of Natural History
TACFI	TACFI122-12	JP00227		BOLD:ABX1426	JP00227	658[0n]	2		1					2005-07-08	Hyalurgus crucigerus	A			Tampere Museum of Natural History	Period: Jul-08-2005 - Jul-14-2005
TACFI	TACFI123-12	JP00228		BOLD:ABX1738	JP00228	658[0n]	2		1					2007-08-16	Hyalurgus lucidus	A			Tampere Museum of Natural History
TACFI	TACFI124-12	JP00229		BOLD:ACA9848	JP00229	658[0n]	2		1					2006-07-03	Gymnocheta magna	A			Tampere Museum of Natural History
TACFI	TACFI125-12	JP00230			JP00230	0[n]	2		1					2008-06-19	Gymnocheta viridis	A			Tampere Museum of Natural History	Period: Jun-19-2008 - Aug-02-2008
TACFI	TACFI126-12	JP00231			JP00231	0[n]	2		1					2005-06-13	Zophomyia temula	A			Tampere Museum of Natural History
TACFI	TACFI127-12	JP00232		BOLD:ACB0231	JP00232	658[0n]	2		1					2005-06-13	Cleonice callida	A			Tampere Museum of Natural History
TACFI	TACFI128-12	JP00233		BOLD:ABW4998	JP00233	658[0n]	2		1					2005-07-28	Loewia foeda	A			Tampere Museum of Natural History	Period: Jul-28-2005 - Aug-13-2005
TACFI	TACFI129-12	JP00234		BOLD:AAY0209	JP00234	657[0n]	2		1					2004-07-14	Loewia erecta	A			Tampere Museum of Natural History
TACFI	TACFI130-12	JP00235		BOLD:ACB0176	JP00235	658[0n]	2		1					1998-08-13	Loewia brevifrons	A			Tampere Museum of Natural History
TACFI	TACFI131-12	JP00236			JP00236	0[n]	2		1					1979-08-05	Loewia phaeoptera	A			Tampere Museum of Natural History
TACFI	TACFI132-12	JP00237			JP00237	0[n]	2		1					1983-07-10	Loewia submetallica	A			Tampere Museum of Natural History
TACFI	TACFI133-12	JP00238			JP00238	0[n]	2		1					1965-08-13	Loewia nudigena	A			Tampere Museum of Natural History
TACFI	TACFI134-12	JP00239		BOLD:ACA9834	JP00239	658[0n]	2		1					2005-07-26	Eloceria delecta	A			Tampere Museum of Natural History
TACFI	TACFI135-12	JP00240		BOLD:ACA9972	JP00240	658[0n]	2		1					2009-07-29	Pseudopachystylum gonioides	A			Tampere Museum of Natural History
TACFI	TACFI136-12	JP00241		BOLD:ABV4494	JP00241	658[0n]	2		1					2007-06-03	Pelatachina tibialis	A			Tampere Museum of Natural History
TACFI	TACFI137-12	JP00242		BOLD:AAV0907	JP00242	658[0n]	2		1					2008-05-17	Macquartia dispar	A			Tampere Museum of Natural History	Period: May-17-2008 - Jun-19-2008
TACFI	TACFI138-12	JP00243		BOLD:ACA9946	JP00243	658[0n]	2		1					2009-05-22	Macquartia nudigena	A			Tampere Museum of Natural History
TACFI	TACFI139-12	JP00244		BOLD:ACA9946	JP00244	658[0n]	2		1					2008-05-29	Macquartia nudigena	A			Tampere Museum of Natural History
TACFI	TACFI140-12	JP00245		BOLD:ACO3992	JP00245	658[1n]	2		1					2006-05-16	Triarthria setipennis	A			Tampere Museum of Natural History
TACFI	TACFI141-12	JP00246		BOLD:ACO3992	JP00246	636[0n]	2		1					2011-07-11	Triarthria setipennis	A			Tampere Museum of Natural History
TACFI	TACFI142-12	JP00247			JP00247	0[n]	2		1					2005-07-14	Phytomyptera bohemica	A			Tampere Museum of Natural History	Period: Jul-14-2005 - Jul-27-2005
TACFI	TACFI143-12	JP00248			JP00248	0[n]	2		1					2009-06-01	Phytomyptera cingulata	A			Tampere Museum of Natural History
TACFI	TACFI144-12	JP00249			JP00249	0[n]	2		1					2009-07-16	Phytomyptera minutissima	A			Tampere Museum of Natural History
TACFI	TACFI145-12	JP00250		BOLD:ACB0100	JP00250	658[0n]	2		1					2008-08-02	Phytomyptera zonella	A			Tampere Museum of Natural History	Period: Aug-02-2008 - Sep-21-2008
TACFI	TACFI146-12	JP00251			JP00251	0[n]	2		1					2004-07-24	Graphogaster buccata	A			Tampere Museum of Natural History
TACFI	TACFI147-12	JP00252			JP00252	0[n]	2		1					2004-08-21	Graphogaster brunnescens	A			Tampere Museum of Natural History
TACFI	TACFI148-12	JP00253		BOLD:ACV5728	JP00253	658[1n]	2		1					2008-06-06	Ceranthia abdominalis	A			Tampere Museum of Natural History	Period: Jun-06-2008 - Jul-24-2008
TACFI	TACFI149-12	JP00254			JP00254	0[n]	2		1					2008-06-30	Ceromya bicolor	A			Tampere Museum of Natural History	Period: Jun-30-2008 - Jul-27-2008
TACFI	TACFI150-12	JP00255		BOLD:ACB0186	JP00255	658[0n]	2		1					2011-07-15	Microsoma exiguum	A			Tampere Museum of Natural History
TACFI	TACFI151-12	JP00256			JP00256	0[n]	2		1					2008-05-25	Actia crassicornis	A			Tampere Museum of Natural History	Period: May-25-2008 - Jun-30-2008
TACFI	TACFI152-12	JP00257		BOLD:ABV4561	JP00257	658[0n]	2		1					2005-06-09	Actia lamia	A			Tampere Museum of Natural History
TACFI	TACFI153-12	JP00258			JP00258	0[n]	2		1					2007-07-22	Actia nigroscutellata	A			Tampere Museum of Natural History
TACFI	TACFI154-12	JP00259			JP00259	265[0n]	2		1					2003-07-22	Actia pilipennis	A			Tampere Museum of Natural History	Period: Jul-22-2003 - Aug-21-2003
TACFI	TACFI155-12	JP00260			JP00260	0[n]	2		1					2005-07-27	Actia resinellae	A			Tampere Museum of Natural History	Period: Jul-27-2005 - Aug-12-2005
TACFI	TACFI156-12	JP00261		BOLD:ACB0134	JP00261	658[0n]	2		1					2007-05-26	Peribaea hertingi	A			Tampere Museum of Natural History	Period: May-26-2007 - Jun-17-2007
TACFI	TACFI157-12	JP00262		BOLD:ACB1892	JP00262	658[3n]	2		1					2010-09-11	Peribaea tibialis	A			Tampere Museum of Natural History
TACFI	TACFI158-12	JP00263			JP00263	0[n]	2		1					2007-08-02	Ceranthia abdominalis	A			Tampere Museum of Natural History	Period: Aug-02-2007 - Sep-01-2007
TACFI	TACFI159-12	JP00264		BOLD:AAM7892	JP00264	658[0n]	2		1					2005-06-11	Ceranthia lichtwardtiana	A			Tampere Museum of Natural History
TACFI	TACFI160-12	JP00265		BOLD:AAZ5274	JP00265	658[0n]	2		1					2008-05-30	Ceranthia tenuipalpis	A			Tampere Museum of Natural History	Period: May-30-2008 - Jun-19-2008
TACFI	TACFI161-12	JP00266			JP00266	0[n]	2		1					2003-07-22	Aphantorhaphopsis samarensis	A			Tampere Museum of Natural History	Period: Jul-22-2003 - Aug-21-2003
TACFI	TACFI162-12	JP00267			JP00267	0[n]	2		1					2007-09-09	Aphantorhaphopsis siphonoides	A			Tampere Museum of Natural History	Period, start day unknown (marked on label as `xx-9.9.2007`)
TACFI	TACFI163-12	JP00268			JP00268	0[n]	2		1					2003-07-22	Aphantorhaphopsis verralli	A			Tampere Museum of Natural History	Period: Jul-22-2003 - Aug-21-2003
TACFI	TACFI164-12	JP00269			JP00269	0[n]	2		1					2000-07-12	Siphona boreata	A			Tampere Museum of Natural History	Period: Jul-12-2000 - Aug-07-2000
TACFI	TACFI165-12	JP00270		BOLD:ACB0218	JP00270	658[0n]	2		1					2004-07-03	Siphona collini	A			Tampere Museum of Natural History
TACFI	TACFI166-12	JP00271			JP00271	0[n]	2		1					2008-05-30	Siphona confusa	A			Tampere Museum of Natural History	Period: May-30-2008 - Jun-19-2008
TACFI	TACFI167-12	JP00272		BOLD:AAG2433	JP00272	561[0n]	2		1					2005-07-15	Siphona flavifrons	A			Tampere Museum of Natural History	Period: Jul-15-2005 - Jul-28-2005
TACFI	TACFI168-12	JP00273			JP00273	0[n]	2		1					2008-05-25	Siphona geniculata	A			Tampere Museum of Natural History	Period: May-25-2008 - Jun-30-2008
TACFI	TACFI169-12	JP00274		BOLD:ACB0069	JP00274	658[0n]	2		1					2006-04-30	Siphona ingerae	A			Tampere Museum of Natural History
TACFI	TACFI170-12	JP00275		BOLD:ACA9865	JP00275	658[0n]	2		1					2008-06-27	Siphona paludosa	A			Tampere Museum of Natural History
TACFI	TACFI171-12	JP00276		BOLD:ACB0218	JP00276	658[0n]	2		1					2007-05-27	Siphona maculata	A			Tampere Museum of Natural History
TACFI	TACFI172-12	JP00277		BOLD:ACA9864	JP00277	658[0n]	2		1					2005-07-08	Siphona nigricans	A			Tampere Museum of Natural History	Period: Jul-08-2005 - Jul-14-2005
TACFI	TACFI173-12	JP00278		BOLD:ACA9865	JP00278	658[0n]	2		1					2005-08-07	Siphona paludosa	A			Tampere Museum of Natural History
TACFI	TACFI174-12	JP00279		BOLD:ACA9865	JP00279	658[0n]	2		1					2007-08-06	Siphona paludosa	A			Tampere Museum of Natural History
TACFI	TACFI175-12	JP00280		BOLD:AAG2108	JP00280	658[1n]	2		1					2006-07-03	Siphona rossica	A			Tampere Museum of Natural History
TACFI	TACFI176-12	JP00281			JP00281	0[n]	2		1					2006-07-09	Siphona setosa	A			Tampere Museum of Natural History	Period: Jul-09-2006 - Aug-12-2006
TACFI	TACFI177-12	JP00282		BOLD:AAG2433	JP00282	658[0n]	2		1					2000-07-12	Siphona subarctica	A			Tampere Museum of Natural History	Period: Jul-12-2000 - Aug-07-2000
TACFI	TACFI178-12	JP00283		BOLD:ACB0183	JP00283	658[0n]	2		1					2006-06-11	Bithia acanthophora	A			Tampere Museum of Natural History	Period: Jun-11-2006 - Jun-23-2006
TACFI	TACFI179-12	JP00284		BOLD:ACB0182	JP00284	658[0n]	2		1					2011-08-18	Bithia spreta	A			Tampere Museum of Natural History
TACFI	TACFI180-12	JP00285		BOLD:AAV8821	JP00285	658[0n]	2		1					2011-07-06	Solieria inanis	A			Tampere Museum of Natural History
TACFI	TACFI181-12	JP00286		BOLD:AAU6726	JP00286	658[0n]	2		1					2011-07-15	Microphthalma europaea	A			Tampere Museum of Natural History
TACFI	TACFI182-12	JP00287		BOLD:ACB0333	JP00287	658[0n]	2		1					2003-06-06	Estheria	A			Tampere Museum of Natural History	::taxonomy:Estheria sp.::endTaxonomy:
TACFI	TACFI183-12	JP00288			JP00288	153[0n]	2		1					2011-07-14	Billaea pectinata	A			Tampere Museum of Natural History
TACFI	TACFI184-12	JP00289		BOLD:ACB0235	JP00289	658[0n]	2		1					2006-06-11	Zeuxia cinerea	A			Tampere Museum of Natural History	Period: Jun-11-2006 - Jun-23-2006
TACFI	TACFI185-12	JP00290		BOLD:ABZ2498	JP00290	658[0n]	2		1					2008-07-07	Blepharomyia angustifrons	A			Tampere Museum of Natural History
TACFI	TACFI186-12	JP00291		BOLD:ACB0261	JP00291	658[0n]	2		1					2011-04-02	Kirbya moerens	A			Tampere Museum of Natural History
TACFI	TACFI187-12	JP00292		BOLD:ACB0149	JP00292	658[0n]	2		1					2005-06-25	Athrycia curvinervis	A			Tampere Museum of Natural History
TACFI	TACFI188-12	JP00293		BOLD:ACE3859	JP00293	658[0n]	2		1					2007-07-21	Athrycia impressa	A			Tampere Museum of Natural History
TACFI	TACFI189-12	JP00294		BOLD:ACA9927	JP00294	658[0n]	2		1					2007-06-22	Athrycia trepida	A			Tampere Museum of Natural History	Period: Jun-22-2007 - Jun-24-2007
TACFI	TACFI190-12	JP00295		BOLD:ACB0186	JP00295	658[0n]	2		1					2011-08-21	Microsoma exiguum	A			Tampere Museum of Natural History
TACFI	FIDIP1145-12	MZH_GV.3522	MZH_GV.3522	BOLD:ACA6555	MZH_GV.3522	658[0n]	2		1					2011-05-29	Gymnocheta viridis	A	jka11-02598		University of Helsinki	http://id.luomus.fi/MZH_GV.3522
TACFI	FIDIP1147-12	MZH_GV.3524	MZH_GV.3524	BOLD:AAF6259	MZH_GV.3524	658[0n]	2		1					2011-05-29	Lypha dubia	A	jka11-02614		University of Helsinki	http://id.luomus.fi/MZH_GV.3524
TACFI	FIDIP1152-12	MZH_GV.3529	MZH_GV.3529	BOLD:ACB0218	MZH_GV.3529	658[0n]	2		1					2011-05-29	Siphona collini	A	jka11-02586		University of Helsinki	http://id.luomus.fi/MZH_GV.3529
TACFI	TACFI191-12	JP00101		BOLD:ACB0814	JP00101	623[0n]	2		1					2006-06-11	Clytiomya continua	A			Tampere Museum of Natural History	Period: Jun-11-2006 - Jun-23-2006
TACFI	TACFI192-12	JP00102		BOLD:AAO0884	JP00102	637[0n]	2		1					2008-07-01	Ectophasia crassipennis	A			Tampere Museum of Natural History
TACFI	TACFI193-12	JP00103		BOLD:ACB1000	JP00103	658[0n]	2		1					2006-06-11	Xysta holosericea	A			Tampere Museum of Natural History	Period: Jun-11-2006 - Jun-23-2006
TACFI	TACFI194-12	JP00104		BOLD:ACB0734	JP00104	658[0n]	2		1					2011-10-01	Opesia descendens	A			Tampere Museum of Natural History
TACFI	TACFI195-12	JP00105		BOLD:ACB1039	JP00105	658[0n]	2		1					2011-08-14	Eulabidogaster setifacies	A			Tampere Museum of Natural History
TACFI	TACFI196-12	JP00106		BOLD:AAZ4770	JP00106	658[0n]	2		1					2011-08-20	Leucostoma meridianum	A			Tampere Museum of Natural History
TACFI	TACFI197-12	JP00107		BOLD:AAZ4770	JP00107	658[0n]	2		1					2011-07-10	Leucostoma tetraptera	A			Tampere Museum of Natural History
TACFI	TACFI198-12	JP00108		BOLD:AAZ4770	JP00108	658[0n]	2		1					2011-06-03	Leucostoma simplex	A			Tampere Museum of Natural History
TACFI	TACFI199-12	JP00109		BOLD:ACB0865	JP00109	658[0n]	2		1					2011-08-21	Clairvillia biguttata	A			Tampere Museum of Natural History
TACFI	TACFI200-12	JP00110		BOLD:ACO3978	JP00110	658[0n]	2		1					2010-05-23	Phania funesta	A			Tampere Museum of Natural History
TACFI	TACFI201-12	JP00111		BOLD:ACB0901	JP00111	658[0n]	2		1					2011-07-11	Cylindromyia rufifrons	A			Tampere Museum of Natural History
TACFI	TACFI202-12	JP00112		BOLD:ACF5729	JP00112	634[0n]	2		1					2011-08-15	Exorista larvarum	A			Tampere Museum of Natural History
TACFI	TACFI203-12	JP00113			JP00113	0[n]	2		1					2006-06-11	Chetogena acuminata	A			Tampere Museum of Natural History	Period: Jun-11-2006 - Jun-23-2006
TACFI	TACFI204-12	JP00114		BOLD:ABV1657	JP00114	658[0n]	2		1					2011-05-29	Parasetigena silvestris	A			Tampere Museum of Natural History
TACFI	TACFI205-12	JP00115		BOLD:ACB1072	JP00115	658[0n]	2		1					2011-04-23	Phorocera assimilis	A			Tampere Museum of Natural History
TACFI	TACFI206-12	JP00116		BOLD:ACF4829	JP00116	658[0n]	2		1					2011-06-07	Phorocera grandis	A			Tampere Museum of Natural History
TACFI	TACFI207-12	JP00117		BOLD:ACB0956	JP00117	658[0n]	2		1					2008-07-01	Gastrolepta anthracina	A			Tampere Museum of Natural History
TACFI	TACFI208-12	JP00118		BOLD:ACB0809	JP00118	658[0n]	2		1					2004-06-13	Medina	A			Tampere Museum of Natural History
TACFI	TACFI209-12	JP00119		BOLD:AAG6902	JP00119	658[0n]	2		1					2004-07-31	Medina separata	A			Tampere Museum of Natural History
TACFI	TACFI210-12	JP00120		BOLD:AAG6902	JP00120	658[0n]	2		1					2005-07-31	Medina separata	A			Tampere Museum of Natural History
TACFI	TACFI211-12	JP00121			JP00121	0[n]	2		1					1985-08-01	Ligeria angusticornis	A			Tampere Museum of Natural History	Date on label: `e .1 1985`
TACFI	TACFI212-12	JP00122		BOLD:AAN4077	JP00122	658[0n]	2		1					2008-07-04	Blondelia nigripes	A			Tampere Museum of Natural History
TACFI	TACFI213-12	JP00123		BOLD:ACB0777	JP00123	658[0n]	2		1					2007-05-26	Acemya rufitibia	A			Tampere Museum of Natural History	Period: May-26-2007 - Jun-17-2007
TACFI	TACFI214-12	JP00124		BOLD:ACB0998	JP00124	658[0n]	2		1					2009-07-27	Paratryphera barbatula	A			Tampere Museum of Natural History
TACFI	TACFI215-12	JP00125		BOLD:ACB0997	JP00125	658[0n]	2		1					2007-06-05	Rhaphiochaeta breviseta	A			Tampere Museum of Natural History
TACFI	TACFI216-12	JP00126		BOLD:ACB0787	JP00126	658[0n]	2		1					2008-05-25	Smidtia amoena	A			Tampere Museum of Natural History
TACFI	TACFI217-12	JP00127		BOLD:ABZ7811	JP00127	658[0n]	2		1					2007-05-20	Winthemia quadripustulata	A			Tampere Museum of Natural History
TACFI	TACFI218-12	JP00128			JP00128	0[n]	2		1					2000-06-21	Winthemia speciosa	A			Tampere Museum of Natural History	Farbschale gelb K100
TACFI	TACFI219-12	JP00129		BOLD:AAZ4539	JP00129	658[0n]	2		1					2008-07-01	Nemorilla floralis	A			Tampere Museum of Natural History
TACFI	TACFI220-12	JP00130		BOLD:ACO3989	JP00130	658[0n]	2		1					2008-05-01	Nemorilla maculosa	A			Tampere Museum of Natural History
TACFI	TACFI221-12	JP00131		BOLD:ACE5781	JP00131	658[0n]	2		1					2004-07-14	Aplomya confinis	A			Tampere Museum of Natural History
TACFI	TACFI222-12	JP00132			JP00132	0[n]	2		1					2005-07-14	Phebellia glauca	A			Tampere Museum of Natural History	Period: Jul-14-2005 - Jul-27-2005
TACFI	TACFI223-12	JP00133		BOLD:AAP8660	JP00133	658[0n]	2		1					2010-09-11	Hubneria affinis	A			Tampere Museum of Natural History
TACFI	TACFI224-12	JP00134		BOLD:ACE9427	JP00134	617[0n]	2		1					1998-07-20	Phebellia nigripalpis	A			Tampere Museum of Natural History	`*363` printed on separate, small yellow label
TACFI	TACFI225-12	JP00135		BOLD:ACB0760	JP00135	658[0n]	2		1					2009-07-30	Phebellia stulta	A			Tampere Museum of Natural History
TACFI	TACFI226-12	JP00136		BOLD:AAP8660	JP00136	658[0n]	2		1					2007-07-21	Hubneria affinis	A			Tampere Museum of Natural History
TACFI	TACFI227-12	JP00137		BOLD:ACB0760	JP00137	658[0n]	2		1					2007-07-25	Phebellia stulta	A			Tampere Museum of Natural History	Period: Jul-25-2007 - Aug-31-2007
TACFI	TACFI228-12	JP00138		BOLD:ACB0824	JP00138	658[0n]	2		1					2009-07-20	Nilea hortulana	A			Tampere Museum of Natural History
TACFI	TACFI229-12	JP00139		BOLD:ACB0796	JP00139	658[0n]	2		1					2005-06-19	Phryxe erythrostoma	A			Tampere Museum of Natural History
TACFI	TACFI230-12	JP00140		BOLD:AAN4017	JP00140	658[0n]	2		1					2008-06-30	Pales pavida	A			Tampere Museum of Natural History
TACFI	TACFI231-12	JP00141		BOLD:ABW1716	JP00141	658[0n]	2		1					2007-06-29	Tlephusa cincinna	A			Tampere Museum of Natural History	Period: Jun-29-2007 - Jul-12-2007
TACFI	TACFI232-12	JP00142		BOLD:ACB0954	JP00142	658[0n]	2		1					2006-07-01	Epicampocera succincta	A			Tampere Museum of Natural History
TACFI	TACFI233-12	JP00143		BOLD:ACZ8981	JP00143	658[0n]	2		1					2009-07-30	Phryxe vulgaris	A			Tampere Museum of Natural History
TACFI	TACFI234-12	JP00144			JP00144	0[n]	2		1					2010-08-14	Phryxe heraclei	A			Tampere Museum of Natural History
TACFI	TACFI235-12	JP00145		BOLD:ACZ8981	JP00145	658[0n]	2		1					2005-07-27	Phryxe vulgaris	A			Tampere Museum of Natural History
TACFI	TACFI236-12	JP00146		BOLD:ACO3982	JP00146	658[0n]	2		1					2006-06-24	Bactromyia aurulenta	A			Tampere Museum of Natural History	JF06-0640: malaise trap
TACFI	TACFI237-12	JP00147		BOLD:AAX6857	JP00147	658[0n]	2		1					2006-07-28	Pseudoperichaeta nigrolineata	A			Tampere Museum of Natural History	JF06-1911: malaise trap
TACFI	TACFI238-12	JP00148		BOLD:AAN4017	JP00148	658[0n]	2		1					2006-06-11	Pales pavida	A			Tampere Museum of Natural History	Period: Jun-11-2006 - Jun-23-2006
TACFI	TACFI239-12	JP00149		BOLD:AAP8653	JP00149	637[0n]	2		1					2009-07-29	Lydella ripae	A			Tampere Museum of Natural History
TACFI	TACFI240-12	JP00150		BOLD:AAP8653	JP00150	658[0n]	2		1					2005-08-27	Lydella stabulans	A			Tampere Museum of Natural History
TACFI	TACFI241-12	JP00151		BOLD:ACB0938	JP00151	658[0n]	2		1					2011-07-11	Chetina setigena	A			Tampere Museum of Natural History
TACFI	TACFI242-12	JP00152		BOLD:AAN9651	JP00152	658[0n]	2		1					2004-07-13	Cadurciella tritaeniata	A			Tampere Museum of Natural History
TACFI	TACFI243-12	JP00153		BOLD:ACB1074	JP00153	658[0n]	2		1					2007-06-22	Drino galii	A			Tampere Museum of Natural History	Period: Jun-22-2007 - Jun-24-2007
TACFI	TACFI244-12	JP00154		BOLD:AAG2368	JP00154	658[0n]	2		1					2005-08-01	Drino inconspicua	A			Tampere Museum of Natural History	`e.1. 2005 ?Dipnon pini?`
TACFI	TACFI245-12	JP00155		BOLD:ACB1006	JP00155	658[0n]	2		1					2006-07-11	Drino lota	A			Tampere Museum of Natural History	JF06-1828: malaise trap
TACFI	TACFI246-12	JP00156		BOLD:ACB0723	JP00156	658[0n]	2		1					2006-06-30	Drino vicina	A			Tampere Museum of Natural History	::taxonomy:Drino vicina::endTaxonomy:
TACFI	TACFI247-12	JP00157		BOLD:AAP8660	JP00157	647[0n]	2		1					2005-06-12	Hubneria affinis	A			Tampere Museum of Natural History
TACFI	TACFI248-12	JP00158		BOLD:ACB0942	JP00158	658[0n]	2		1					2003-07-22	Carcelia atricosta	A			Tampere Museum of Natural History	Period: Jul-22-2003 - Aug-21-2003
TACFI	TACFI249-12	JP00159			JP00159	0[n]	2		1					1994-04-20	Carcelia iliaca	A			Tampere Museum of Natural History	`ex Thaumet. processionea`: Period: Apr-20-1994 - Apr-21-1994
TACFI	TACFI250-12	JP00160		BOLD:ACB0816	JP00160	658[0n]	2		1					2007-05-26	Carcelia laxifrons	A			Tampere Museum of Natural History	Period: May-26-2007 - Jun-17-2007
TACFI	TACFI251-12	JP00161		BOLD:AAG2429	JP00161	658[0n]	2		1					2009-04-29	Carcelia lucorum	A			Tampere Museum of Natural History
TACFI	TACFI252-12	JP00162			JP00162	415[0n]	2		1					1990-01-01	Carcelia rasa	A			Tampere Museum of Natural History	ex larva
TACFI	TACFI253-12	JP00163		BOLD:ACB0750	JP00163	658[0n]	2		1					2007-07-02	Senometopia excisa	A			Tampere Museum of Natural History
TACFI	TACFI254-12	JP00164		BOLD:ACB0751	JP00164	658[0n]	2		1					2009-07-27	Senometopia pollinosa	A			Tampere Museum of Natural History
TACFI	TACFI255-12	JP00165		BOLD:ACB0778	JP00165	658[0n]	2		1					2006-07-29	Senometopia separata	A			Tampere Museum of Natural History	`Senemetopia separata` on label
TACFI	TACFI256-12	JP00166		BOLD:ACB0772	JP00166	658[0n]	2		1					2001-05-12	Erycia furibunda	A			Tampere Museum of Natural History	ex larva: Period: May-12-2001 - May-25-2001
TACFI	TACFI257-12	JP00167			JP00167	0[n]	2		1					1994-04-22	Carcelia iliaca	A			Tampere Museum of Natural History	Period: Apr-22-1994 - Apr-25-1994
TACFI	TACFI258-12	JP00168		BOLD:ACB0759	JP00168	617[0n]	2		1					1994-01-01	Xylotachina diluta	A			Tampere Museum of Natural History	ex larva
TACFI	TACFI259-12	JP00169		BOLD:ACB0935	JP00169	658[0n]	2		1					2011-07-10	Alsomyia capillata	A			Tampere Museum of Natural History
TACFI	TACFI260-12	JP00170			JP00170	0[n]	2		1					2005-08-14	Platymya fimbriata	A			Tampere Museum of Natural History
TACFI	TACFI261-12	JP00171		BOLD:AAC1602	JP00171	658[0n]	2		1					2003-09-08	Eumea linearicornis	A			Tampere Museum of Natural History
TACFI	TACFI262-12	JP00172		BOLD:AAC1602	JP00172	658[0n]	2		1					2007-05-26	Eumea mitis	A			Tampere Museum of Natural History	Period: May-26-2007 - Jun-17-2007
TACFI	TACFI263-12	JP00173		BOLD:ACB1056	JP00173	658[0n]	2		1					2010-06-27	Myxexoristops blondeli	A			Tampere Museum of Natural History
TACFI	TACFI264-12	JP00174		BOLD:ACB1056	JP00174	658[0n]	2		1					2008-07-14	Myxexoristops stolida	A			Tampere Museum of Natural History
TACFI	TACFI265-12	JP00175		BOLD:AAN9266	JP00175	658[0n]	2		1					2010-08-07	Clemelis pullata	A			Tampere Museum of Natural History
TACFI	TACFI266-12	JP00176		BOLD:ACB0995	JP00176	658[0n]	2		1					2003-01-01	Zenillia libatrix	A			Tampere Museum of Natural History	ex larva
TACFI	TACFI267-12	JP00177		BOLD:AAN4017	JP00177	658[0n]	2		1					2007-07-12	Pales pavida	A			Tampere Museum of Natural History	Period: Jul-12-2007 - Jul-29-2007
TACFI	TACFI268-12	JP00178		BOLD:ACB1031	JP00178	658[0n]	2		1					2006-06-11	Pales peregrina	A			Tampere Museum of Natural History	Period: Jun-11-2006 - Jun-23-2006
TACFI	TACFI269-12	JP00179		BOLD:ACB0896	JP00179	651[0n]	2		1					2006-04-29	Cyzenis albicans	A			Tampere Museum of Natural History
TACFI	TACFI270-12	JP00180			JP00180	0[n]	2		1					2005-05-22	Cyzenis jucunda	A			Tampere Museum of Natural History	Period: May-22-2005 - Jun-19-2005
TACFI	TACFI271-12	JP00181		BOLD:ACB0930	JP00181	658[0n]	2		1					2007-04-16	Botria subalpina	A			Tampere Museum of Natural History
TACFI	TACFI272-12	JP00182		BOLD:ACB0931	JP00182	654[0n]	2		1					2006-05-07	Bothria frontosa	A			Tampere Museum of Natural History
TACFI	TACFI273-12	JP00183		BOLD:ABW0151	JP00183	641[0n]	2		1					2005-07-27	Allophorocera ferruginea	A			Tampere Museum of Natural History
TACFI	TACFI274-12	JP00184		BOLD:ACB1057	JP00184	658[0n]	2		1					2010-08-07	Ocytata pallipes	A			Tampere Museum of Natural History
TACFI	TACFI275-12	JP00185		BOLD:ACB0964	JP00185	658[0n]	2		1					2001-09-30	Elodia ambulatoria	A			Tampere Museum of Natural History
TACFI	TACFI276-12	JP00186		BOLD:ACB0795	JP00186	658[0n]	2		1					2009-04-26	Blepharipa pratensis	A			Tampere Museum of Natural History	`Plephariba pratensis` on label
TACFI	TACFI277-12	JP00187		BOLD:ACB0815	JP00187	658[0n]	2		1					2008-06-01	Masicera pavoniae	A			Tampere Museum of Natural History
TACFI	TACFI278-12	JP00188		BOLD:ACB0869	JP00188	658[0n]	2		1					2006-06-15	Prosopea nigricans	A			Tampere Museum of Natural History	malaise trap
TACFI	TACFI279-12	JP00189			JP00189	0[n]	2		1					2008-06-30	Frontina laeta	A			Tampere Museum of Natural History	Period: Jun-30-2008 - Jul-27-2008
TACFI	TACFI280-12	JP00190		BOLD:ACB0966	JP00190	658[0n]	2		1					2006-05-07	Brachicheta strigata	A			Tampere Museum of Natural History
TACFI	TACFI281-12	JP00191			JP00191	478[1n]	2		1					1998-06-10	Gonia bimaculata	A			Tampere Museum of Natural History
TACFI	TACFI282-12	JP00192		BOLD:AAY2346	JP00192	658[0n]	2		1					2006-05-07	Gonia ornata	A			Tampere Museum of Natural History
TACFI	TACFI283-12	JP00193		BOLD:ACB0817	JP00193	658[0n]	2		1					2009-05-02	Gonia divisa	A			Tampere Museum of Natural History
TACFI	TACFI284-12	JP00194		BOLD:ACB0817	JP00194	658[0n]	2		1					2006-05-07	Gonia picea	A			Tampere Museum of Natural History
TACFI	TACFI285-12	JP00195		BOLD:ACB1016	JP00195	658[0n]	2		1					2009-07-19	Onychogonia flaviceps	A			Tampere Museum of Natural History
TACFI	FIDIP2602-12	jka11-01724		BOLD:AAV0908	HP.1350	658[0n]	3		1					2011-06-27	Oswaldia muscaria	A			University of Helsinki	Museum voucher id: http://id.luomus.fi/HP.1350
TACFI	FIDIP2615-12	jka11-00489		BOLD:AAV9202	HP.1363	658[0n]	3		1					2011-06-27	Cylindromyia brassicaria	A			University of Helsinki	Museum voucher id: http://id.luomus.fi/HP.1363
TACFI	FIDIP2653-12	jka11-01645		BOLD:AAV8821	HP.1401	658[0n]	3		1					2011-06-27	Solieria pacifica	A			University of Helsinki	Museum voucher id: http://id.luomus.fi/HP.1401
TACFI	FIDIP2680-12	jka11-00705		BOLD:ACB1006	HP.994	658[0n]	2		1					2011-07-01	Drino lota	A			University of Helsinki	Museum voucher id: http://id.luomus.fi/HP.994
TACFI	FIDIP2696-12	jka11-00770		BOLD:AAY0209	HP.1010	658[0n]	2		1					2011-07-03	Loewia erecta	A			University of Helsinki	Museum voucher id: http://id.luomus.fi/HP.1010
TACFI	FIDIP2714-12	jka11-00839		BOLD:ACE1201	HP.1028	658[0n]	2		1					2011-07-01	Actia maksymovi	A			University of Helsinki	Museum voucher id: http://id.luomus.fi/HP.1028
TACFI	FIDIP2720-12	jka11-00898		BOLD:ACO3978	HP.1034	658[0n]	2		1					2011-07-06	Phania funesta	A			University of Helsinki	Museum voucher id: http://id.luomus.fi/HP.1034
TACFI	FIDIP2721-12	jka11-00903		BOLD:AAV8535	HP.1035	658[0n]	2		1					2011-07-06	Zaira cinerea	A			University of Helsinki	Museum voucher id: http://id.luomus.fi/HP.1035
TACFI	FIDIP2726-12	jka11-00899		BOLD:AAV9222	HP.1040	658[0n]	2		1					2011-07-06	Cistogaster globosa	A			University of Helsinki	Museum voucher id: http://id.luomus.fi/HP.1040
TACFI	FIDIP2730-12	jka11-00965		BOLD:ACD1435	HP.1044	653[0n]	2		1					2011-07-06	Thelaira nigrina	A			University of Helsinki	Museum voucher id: http://id.luomus.fi/HP.1044
TACFI	FIDIP2739-12	jka11-01060		BOLD:AAG2144	HP.1053	658[0n]	2		1					2011-07-08	Cylindromyia interrupta	A			University of Helsinki	Museum voucher id: http://id.luomus.fi/HP.1053
TACFI	FIDIP2742-12	jka11-01055		BOLD:AAV9204	HP.1056	658[0n]	2		1					2011-07-08	Cylindromyia pusilla	A			University of Helsinki	Museum voucher id: http://id.luomus.fi/HP.1056
TACFI	FIDIP2851-12	JP00301		BOLD:ACF5729	JP00301	658[0n]	4		1					2008-06-20	Exorista fasciata	A			Tampere Museum of Natural History	Identifiers:Jaakko L.O. Pohjoismaeki
TACFI	FIDIP2852-12	JP00302			JP00302	0[n]	4		1					2001-07-14	Brullaea ocypteroidea	A			Tampere Museum of Natural History	21.825
TACFI	FIDIP2853-12	JP00303			JP00303	0[n]	4							1999-05-16	Chetogena tschorsnigi	A			Humboldt Universitaet Berlin, Museum fuer Naturkunde	Paratypus
TACFI	FIDIP2854-12	JP00304		BOLD:AAN9266	JP00304	658[0n]	4		1					2003-07-11	Clemelis pullata	A			Tampere Museum of Natural History	24.296
TACFI	FIDIP2855-12	JP00305			JP00305	0[n]	4		1					1992-07-27	Gonia capitata	A			Tampere Museum of Natural History
TACFI	FIDIP2856-12	JP00306			JP00306	0[n]	4		1					1992-07-21	Masicera silvatica	A			Tampere Museum of Natural History
TACFI	FIDIP2857-12	JP00307		BOLD:ACD9613	JP00307	658[0n]	4							2009-07-13	Oswaldia reducta	A			Humboldt Universitaet Berlin, Museum fuer Naturkunde
TACFI	FIDIP2858-12	JP00308		BOLD:ACD9460	JP00308	658[0n]	4		1					2003-07-25	Periarchiclops scutellaris	A			Tampere Museum of Natural History	24.949
TACFI	FIDIP2859-12	JP00309			JP00309	0[n]	4		1					2000-04-27	Phryxe nemea	A			Tampere Museum of Natural History	19.953
TACFI	FIDIP2860-12	JP00310		BOLD:ACD9530	JP00310	639[1n]	4		1					2002-06-26	Pseudoperichaeta palesoidea	A			Tampere Museum of Natural History	22.703
TACFI	FIDIP2861-12	JP00311		BOLD:ABV4519	JP00311	658[0n]	4		1					2000-04-22	Smidtia conspersa	A			Tampere Museum of Natural History	19.842
TACFI	FIDIP2862-12	JP00312		BOLD:ACF3735	JP00312	658[0n]	4		1					2011-05-30	Spallanzania hebes	A			Tampere Museum of Natural History	33.129
TACFI	FIDIP2863-12	JP00313		BOLD:ACF3735	JP00313	658[0n]	4		1					2011-07-09	Spallanzania hebes	A			Tampere Museum of Natural History	33.558
TACFI	FIDIP2864-12	JP00314		BOLD:AAZ8670	JP00314	626[1n]	4		1					1996-07-20	Sturmia bella	A			Tampere Museum of Natural History	14.654
TACFI	FIDIP2865-12	JP00315		BOLD:ACD9518	JP00315	658[0n]	4		1					1996-07-21	Eurithia caesia	A			Tampere Museum of Natural History	14.681
TACFI	FIDIP2866-12	JP00316		BOLD:AAG2113	JP00316	658[0n]	4		1					2004-08-01	Eurithia vivida	A			Tampere Museum of Natural History	27.413
TACFI	FIDIP2867-12	JP00317		BOLD:ACD9475	JP00317	658[0n]	4							2011-08-02	Germaria angustata	A			Humboldt Universitaet Berlin, Museum fuer Naturkunde
TACFI	FIDIP2868-12	JP00318		BOLD:ACD9580	JP00318	658[0n]	4		1					2011-05-28	Nemoraea pellucida	A			Tampere Museum of Natural History	33.061
TACFI	FIDIP2869-12	JP00319		BOLD:AAK1389	JP00319	658[0n]	4		1					2000-08-08	Nowickia ferox	A			Tampere Museum of Natural History	20.991
TACFI	FIDIP2870-12	JP00320		BOLD:AAK1389	JP00320	658[0n]	4		1					2004-08-12	Nowickia ferox	A			Tampere Museum of Natural History
TACFI	FIDIP2871-12	JP00321		BOLD:AAZ5252	JP00321	658[0n]	4		1					2003-07-22	Peleteria rubescens	A			Tampere Museum of Natural History	24.873
TACFI	FIDIP2872-12	JP00322		BOLD:ACD9479	JP00322	658[0n]	4		1					2011-07-26	Siphona grandistyla	A			Tampere Museum of Natural History	33.590
TACFI	FIDIP2873-12	JP00323		BOLD:ACD9618	JP00323	598[0n]	4		1					1996-07-26	Dexia rustica	A			Tampere Museum of Natural History	14.961
TACFI	FIDIP2874-12	JP00324		BOLD:ACD9587	JP00324	658[0n]	4		1					2003-07-22	Eriothrix argyreatus	A			Tampere Museum of Natural History	24.863
TACFI	FIDIP2875-12	JP00325		BOLD:AAV7115	JP00325	658[0n]	4		1					2007-06-17	Eriothrix rufomaculatus	A			Tampere Museum of Natural History	Period: Jun-17-2007 - Jun-29-2007
TACFI	FIDIP2876-12	JP00326			JP00326	0[n]	4		1					1999-07-31	Estheria petiolata	A			Tampere Museum of Natural History	19.435
TACFI	FIDIP2877-12	JP00327		BOLD:ACD9481	JP00327	658[0n]	4		1					2004-07-25	Periscepsia carbonaria	A			Tampere Museum of Natural History	27.015
TACFI	FIDIP2878-12	JP00328		BOLD:ACD9469	JP00328	633[0n]	4		1					1996-06-01	Therobia leonidei	A			Tampere Museum of Natural History	Identifiers: G.U.C. Lehmann, Jaakko L.O. Pohjoismaeki, Host: Poeciloman mariannae G.U.C. Lehmann det.
TACFI	FIDIP2879-12	JP00329			JP00329	0[n]	4		1					1996-06-01	Therobia leonidei	A			Tampere Museum of Natural History	Identifiers: G.U.C. Lehmann, Jaakko L.O. Pohjoismaeki, Host: Poeciloman mariannae G.U.C. Lehmann det.
TACFI	FIDIP2880-12	JP00330			JP00330	0[n]	4		1					2007-07-12	Phryxe magnicornis	A			Tampere Museum of Natural History	Period: Jul-12-2007 - Jul-29-2007
TACFI	FIDIP2881-12	JP00331		BOLD:AAV9221	JP00331	658[0n]	4		1					2009-05-22	Cinochira atra	A			Tampere Museum of Natural History	Period: May-22-2009 - May-26-2009: mal. trap
TACFI	FIDIP2882-12	JP00332		BOLD:ACO3996	JP00332	658[0n]	4		1					2011-08-14	Gymnosoma clavatum	A			Tampere Museum of Natural History
TACFI	FIDIP2883-12	JP00333		BOLD:ACO3996	JP00333	658[0n]	4		1					2010-07-11	Gymnosoma clavatum	A			Tampere Museum of Natural History
TACFI	FIDIP2884-12	JP00334			JP00334	0[n]	4		1					2005-06-02	Gymnosoma nudifrons	A			Tampere Museum of Natural History
TACFI	FIDIP2885-12	JP00335		BOLD:ACO3996	JP00335	658[0n]	4		1					2005-06-27	Gymnosoma nudifrons	A			Tampere Museum of Natural History
TACFI	FIDIP2886-12	JP00336		BOLD:ACO3996	JP00336	658[0n]	4		1					2010-08-07	Gymnosoma rotundatum	A			Tampere Museum of Natural History
TACFI	FIDIP2887-12	JP00337			JP00337	0[n]	4		1					1988-08-05	Gymnosoma rotundatum	A			Tampere Museum of Natural History
TACFI	FIDIP2888-12	JP00338			JP00338	360[4n]	4		1					2011-07-15	Gymnosoma nr. Costatum	A			Tampere Museum of Natural History	Species: Gymnosoma costatum/intermedium
TACFI	FIDIP2889-12	JP00339		BOLD:ACD9538	JP00339	658[0n]	4		1					2011-07-16	Graphogaster vestita	A			Tampere Museum of Natural History
TACFI	FIDIP2890-12	JP00340		BOLD:ACB0261	JP00340	658[0n]	4		1					2012-03-17	Kirbya moerens	A			Tampere Museum of Natural History
TACFI	FIDIP2891-12	JP00341		BOLD:ACA9827	JP00341	658[0n]	4		1					2012-04-03	Tachina lurida	A			Tampere Museum of Natural History
TACFI	FIDIP2892-12	JP00342		BOLD:ACD9465	JP00342	658[0n]	4		1					2012-04-03	Phryno vetula	A			Tampere Museum of Natural History
TACFI	FIDIP2893-12	JP00343		BOLD:ACD3589	JP00343	658[0n]	4		1					2011-05-28	Cyrtophleba ruricola	A			Tampere Museum of Natural History
TACFI	FIDIP2894-12	JP00344			JP00344	0[n]	4		1					2011-09-10	Paracraspedothrix montivaga	A			Tampere Museum of Natural History
TACFI	FIDIP2895-12	JP00345		BOLD:AAX3938	JP00345	658[0n]	4		1					2011-07-15	Mintho rufiventris	A			Tampere Museum of Natural History
TACFI	FIDIP2896-12	JP00346		BOLD:ACF6755	JP00346	658[0n]	8		1					2012-05-03	Exorista deligata	A			Tampere Museum of Natural History
TACFI	FIDIP2897-12	JP00347		BOLD:AAG2163	JP00347	658[0n]	4		1					2012-05-04	Exorista glossatorum	A			Tampere Museum of Natural History
TACFI	FIDIP2898-12	JP00348		BOLD:ACB1072	JP00348	658[0n]	4		1					2012-04-30	Phorocera assimilis	A			Tampere Museum of Natural History
TACFI	FIDIP2899-12	JP00349		BOLD:ACD9491	JP00349	658[0n]	4		1					2012-05-09	Pandelleia albipennis	A			Tampere Museum of Natural History
TACFI	FIDIP2900-12	JP00350		BOLD:ACD9491	JP00350	658[0n]	4		1					2012-05-09	Pandelleia albipennis	A			Tampere Museum of Natural History
TACFI	FIDIP2901-12	JP00351		BOLD:ACD9546	JP00351	658[0n]	4		1					2012-05-04	Zeuxia subapennina	A			Tampere Museum of Natural History
TACFI	FIDIP2902-12	JP00352		BOLD:ACD9482	JP00352	658[0n]	4		1					2012-05-04	Voria	A			Tampere Museum of Natural History
TACFI	FIDIP2903-12	JP00353		BOLD:AAG2158	JP00353	658[0n]	4		1					2012-05-08	Phasia theodori	A			Tampere Museum of Natural History
TACFI	FIDIP2904-12	JP00354		BOLD:ACP4323	JP00354	658[0n]	4		1					2012-05-04	Phasia pusilla	A			Tampere Museum of Natural History
TACFI	FIDIP2905-12	JP00355		BOLD:ACD9564	JP00355	658[0n]	4		1					2012-05-09	Trichactia pictiventris	A			Tampere Museum of Natural History
TACFI	FIDIP2906-12	JP00356		BOLD:AAP8653	JP00356	658[0n]	4		1					2011-08-21	Lydella grisescens	A			Tampere Museum of Natural History
TACFI	FIDIP2907-12	JP00357		BOLD:ACB0760	JP00357	658[0n]	4		1					2009-07-19	Phebellia stulta	A			Tampere Museum of Natural History
TACFI	FIDIP2908-12	JP00358		BOLD:AAC1602	JP00358	658[0n]	4		1					2010-09-21	Eumea linearicornis	A			Tampere Museum of Natural History
TACFI	FIDIP2909-12	JP00359		BOLD:ACG6905	JP00359	658[0n]	4		1					2004-08-10	Phebellia glaucoides	A			Tampere Museum of Natural History
TACFI	FIDIP2910-12	JP00360		BOLD:ACG6905	JP00360	658[0n]	4		1					2009-07-31	Phebellia margaretae	A			Tampere Museum of Natural History
TACFI	FIDIP2911-12	JP00361		BOLD:ACB1072	JP00361	658[0n]	4		1					2012-04-30	Phorocera assimilis	A			Tampere Museum of Natural History
TACFI	FIDIP2912-12	JP00362		BOLD:ACO3995	JP00362	658[0n]	4		1					2011-04-24	Phorocera obscura	A			Tampere Museum of Natural History
TACFI	FIDIP2913-12	JP00363			JP00363	0[n]	4		1					2010-07-31	Ocytata pallipes	A			Tampere Museum of Natural History
TACFI	FIDIP2914-12	JP00364		BOLD:ACD9577	JP00364	658[0n]	4		1					2012-05-04	Neaera atra	A			Tampere Museum of Natural History
TACFI	FIDIP2915-12	JP00365		BOLD:ACD9576	JP00365	658[0n]	4		1					2012-05-05	Billaea biserialis	A			Tampere Museum of Natural History
TACFI	FIDIP2916-12	JP00366		BOLD:ACD9576	JP00366	658[0n]	4		1					2012-05-06	Billaea biserialis	A			Tampere Museum of Natural History
TACFI	FIDIP2917-12	JP00367		BOLD:AAG2163	JP00367	658[0n]	4		1					2011-07-09	Exorista	A			Tampere Museum of Natural History
TACFI	FIDIP3178-12	jka09-05298		BOLD:AAV8345	jka09-05298	658[0n]	2		1					2009-08-04	Subclytia rotundiventris	A			University of Helsinki
TACFI	FIDIP3179-12	JKA12-0931		BOLD:ACO3996	JKA12-0931	622[2n]	2		1					2002-07-16	Gymnosoma dolycoridis	A			University of Helsinki	Identifiers:J. Kahanpaeae, C. Bergstroem
TACFI	FIDIP3180-12	jka09-04981		BOLD:ACO3996	jka09-04981	658[0n]	2		1					2009-08-03	Gymnosoma dolycoridis	A			University of Helsinki
TACFI	FIDIP3181-12	jka07-05559		BOLD:ACO3996	jka07-05559	658[0n]	2		1					2007-10-04	Gymnosoma dolycoridis	A			University of Helsinki
TACFI	FIDIP3182-12	jka07-05568		BOLD:ACO3996	jka07-05568	658[0n]	2		1					2007-10-04	Gymnosoma dolycoridis	A			University of Helsinki
TACFI	FIDIP3183-12	JKA12-0933		BOLD:ACO3996	JKA12-0933	658[0n]	2		1					2002-07-14	Gymnosoma nudifrons	A			University of Helsinki
TACFI	FIDIP3184-12	jka-05-02928		BOLD:ACO3996	jka-05-02928	658[0n]	2		1					2005-08-03	Gymnosoma nudifrons	A			University of Helsinki
TACFI	FIDIP3185-12	JKA12-0932		BOLD:ACO3996	JKA12-0932	658[0n]	2		1					2003-08-05	Gymnosoma nudifrons	A			University of Helsinki
TACFI	FIDIP3186-12	jka-05-00451		BOLD:ACO3996	jka-05-00451	658[0n]	2		1					2005-06-10	Gymnosoma nudifrons	A			University of Helsinki
TACFI	FIDIP3187-12	jka08-00455		BOLD:AAY2270	jka08-00455	658[0n]	2		1					2008-06-22	Phasia pusilla	A			University of Helsinki
TACFI	FIDIP3188-12	JKA12-0935		BOLD:AAG2311	JKA12-0935	633[0n]	2		1					2002-07-28	Phasia aurulans	A			University of Helsinki
TACFI	FIDIP3189-12	jka09-05729		BOLD:AAG2311	jka09-05729	641[0n]	2		1					2009-08-06	Phasia aurulans	A			University of Helsinki
TACFI	FIDIP3190-12	jka07-04541		BOLD:AAG2311	jka07-04541	658[0n]	2		1					2007-08-02	Phasia obesa	A			University of Helsinki
TACFI	FIDIP3191-12	jka06-00525		BOLD:AAY2271	jka06-00525	566[0n]	2		1					2006-06-09	Phasia subcoleoptrata	A			University of Helsinki
TACFI	FIDIP3192-12	jka07-04405		BOLD:AAY2258	jka07-04405	557[0n]	2		1					2007-08-20	Phasia barbifrons	A			University of Helsinki
TACFI	FIDIP3193-12	jka10-00117		BOLD:AAY2580	jka10-00117	658[0n]	2		1					2010-07-17	Phania thoracica	A			University of Helsinki
TACFI	FIDIP3194-12	jka09-05552			jka09-05552	0[n]	2		1					2009-08-05	Bessa selecta	A			University of Helsinki
TACFI	FIDIP3195-12	jka06-01234		BOLD:AAP8652	jka06-01234	658[0n]	2		1					2006-07-06	Belida angelicae	A			University of Helsinki
TACFI	FIDIP3196-12	jka06-01300		BOLD:AAP8652	jka06-01300	658[0n]	2		1					2006-07-06	Belida angelicae	A			University of Helsinki
TACFI	FIDIP3197-12	jka07-05432		BOLD:AAY2580	jka07-05432	658[0n]	2		1					2007-07-10	Phania thoracica	A			University of Helsinki
TACFI	FIDIP3198-12	JKA12-0936		BOLD:ACD2679	JKA12-0936	658[0n]	2		1					2002-08-18	Medina collaris	A			University of Helsinki
TACFI	FIDIP3199-12	JKA12-0937		BOLD:ACB0809	JKA12-0937	658[0n]	2		1					2004-06-24	Medina	A			University of Helsinki
TACFI	FIDIP3200-12	jka06-02329			jka06-02329	0[n]	2		1					2006-07-27	Admontia blanda	A			University of Helsinki
TACFI	FIDIP3201-12	jka09-04283		BOLD:AAV9890	jka09-04283	658[0n]	2		1					2009-08-01	Admontia blanda	A			University of Helsinki
TACFI	FIDIP3202-12	jka08-00016		BOLD:AAV0908	jka08-00016	658[0n]	2		1					2008-06-24	Oswaldia muscaria	A			University of Helsinki
TACFI	FIDIP3203-12	jka10-02702		BOLD:AAV0908	jka10-02702	658[0n]	2		1					2010-06-30	Oswaldia muscaria	A			University of Helsinki
TACFI	FIDIP3204-12	JKA12-0938			JKA12-0938	0[n]	2		1					2002-07-13	Winthemia quadripustulata	A			University of Helsinki
TACFI	FIDIP3205-12	JKA12-0939			JKA12-0939	0[n]	2		1					2002-07-07	Aplomya confinis	A			University of Helsinki
TACFI	FIDIP3206-12	jka-05-02998		BOLD:ABW1716	jka-05-02998	658[0n]	2		1					2005-07-30	Tlephusa cincinna	A			University of Helsinki
TACFI	FIDIP3207-12	jka10-03381		BOLD:ABW1716	jka10-03381	658[0n]	2		1					2010-07-03	Tlephusa cincinna	A			University of Helsinki
TACFI	FIDIP3208-12	jka-05-02092		BOLD:AAP8653	jka-05-02092	658[0n]	2		1					2005-07-26	Lydella ripae	A			University of Helsinki
TACFI	FIDIP3209-12	JKA12-0940			JKA12-0940	0[n]	2		1					2002-07-13	Lydella stabulans	A			University of Helsinki
TACFI	FIDIP3210-12	JKA12-0941			JKA12-0941	0[n]	2		1					2004-05-13	Hubneria affinis	A			University of Helsinki
TACFI	FIDIP3211-12	jka10-02193		BOLD:ACD2778	jka10-02193	658[0n]	2		1					2010-06-28	Carcelia tibialis	A			University of Helsinki
TACFI	FIDIP3212-12	JKA12-0942		BOLD:ACB0772	JKA12-0942	658[0n]	2		1					2002-07-27	Erycia furibunda	A			University of Helsinki
TACFI	FIDIP3213-12	JKA12-0943			JKA12-0943	0[n]	2		1					2002-07-13	Platymya fimbriata	A			University of Helsinki
TACFI	FIDIP3214-12	jka-05-03818		BOLD:AAG2162	jka-05-03818	658[1n]	2		1					2005-07-05	Platymya fimbriata	A			University of Helsinki
TACFI	FIDIP3215-12	JKA12-0944			JKA12-0944	0[n]	2		1					2004-07-18	Erynnia ocypterata	A			University of Helsinki
TACFI	FIDIP3216-12	JKA12-0945		BOLD:ACD2706	JKA12-0945	658[0n]	2		1					2003-05-29	Hebia flavipes	A			University of Helsinki	niitty
TACFI	FIDIP3217-12	jka06-00105		BOLD:ACD2761	jka06-00105	658[0n]	2		1					2006-05-06	Gonia ornata	A			University of Helsinki
TACFI	FIDIP3218-12	JKA12-0946		BOLD:ACF9775	JKA12-0946	658[0n]	2		1					2002-05-03	Gonia picea	A			University of Helsinki	::taxonomy:Was identified as Gonia ornata. Assingned as picea due to COI. Has enough dusting to be a dark form of ornata!::endTaxonomy:raeme
TACFI	FIDIP3219-12	JKA12-0947		BOLD:ABY5280	JKA12-0947	658[0n]	2		1					2004-07-10	Lydina aenea	A			University of Helsinki
TACFI	FIDIP3220-12	jka-05-03941		BOLD:ABW2498	jka-05-03941	658[0n]	2		1					2005-07-12	Tachina fera	A			University of Helsinki
TACFI	FIDIP3221-12	jka-05-02972		BOLD:ABW2498	jka-05-02972	658[0n]	2		1					2005-07-30	Tachina fera	A			University of Helsinki
TACFI	FIDIP3222-12	jka07-05418		BOLD:ABW2498	jka07-05418	658[0n]	2		1					2007-07-10	Tachina fera	A			University of Helsinki
TACFI	FIDIP3223-12	jka06-01288		BOLD:ABW2498	jka06-01288	658[0n]	2		1					2006-07-06	Tachina fera	A			University of Helsinki
TACFI	FIDIP3224-12	JKA12-0948		BOLD:AAN9512	JKA12-0948	658[0n]	2		1					2002-07-20	Tachina nr. magnicornis	A			University of Helsinki
TACFI	FIDIP3225-12	JKA12-0949		BOLD:AAN9512	JKA12-0949	658[0n]	2		1					2004-06-29	Tachina nr. magnicornis	A			University of Helsinki
TACFI	FIDIP3226-12	jka07-03019		BOLD:AAN9512	jka07-03019	658[0n]	2		1					2007-07-01	Tachina nr. magnicornis	A			University of Helsinki
TACFI	FIDIP3227-12	jka07-07207		BOLD:AAN9512	jka07-07207	658[0n]	2		1					2007-07-21	Tachina nr. magnicornis	A			University of Helsinki
TACFI	FIDIP3228-12	jka07-06244		BOLD:AAN9512	jka07-06244	658[0n]	2		1					2007-07-26	Tachina nr. magnicornis	A			University of Helsinki
TACFI	FIDIP3229-12	jka07-05442		BOLD:AAN9512	jka07-05442	658[0n]	2		1					2007-07-10	Tachina nr. magnicornis	A			University of Helsinki
TACFI	FIDIP3230-12	jka07-07109		BOLD:ACB0179	jka07-07109	658[0n]	2		1					2007-05-13	Tachina ursina	A			University of Helsinki
TACFI	FIDIP3231-12	JKA12-0950		BOLD:ACA9912	JKA12-0950	628[0n]	2		1					2002-07-26	Tachina grossa	A			University of Helsinki
TACFI	FIDIP3232-12	jka07-05400		BOLD:ABY5409	jka07-05400	658[0n]	2		1					2007-07-10	Nowickia marklini	A			University of Helsinki
TACFI	FIDIP3233-12	JKA12-0951		BOLD:ABW4375	JKA12-0951	571[1n]	2		1					2002-07-13	Eurithia anthophila	A			University of Helsinki
TACFI	FIDIP3234-12	jka10-02053		BOLD:AAG2113	jka10-02053	658[0n]	2		1					2010-07-01	Eurithia consobrina	A			University of Helsinki
TACFI	FIDIP3235-12	jka08-00018		BOLD:ACF3891	jka08-00018	658[0n]	2		1					2008-06-24	Gymnocheta	A			University of Helsinki
TACFI	FIDIP3236-12	JKA12-0952			JKA12-0952	0[n]	2		1					2003-07-11	Zophomyia temula	A			University of Helsinki
TACFI	FIDIP3237-12	jka06-00769		BOLD:ACB0231	jka06-00769	645[0n]	2		1					2006-06-17	Cleonice callida	A			University of Helsinki
TACFI	FIDIP3238-12	jka10-00738			jka10-00738	479[0n]	2		1					2010-07-10	Cleonice callida	A			University of Helsinki
TACFI	FIDIP3239-12	JKA12-0953		BOLD:ABV4494	JKA12-0953	633[0n]	2		1					2003-06-11	Pelatachina tibialis	A			University of Helsinki
TACFI	FIDIP3240-12	jka10-00231		BOLD:ACD3910	jka10-00231	658[0n]	2		1					2010-07-15	Anthomyiopsis nigrisquamata	A			University of Helsinki
TACFI	FIDIP3241-12	JKA12-0954			JKA12-0954	0[n]	2		1					2003-06-27	Phytomyptera nigrina	A			University of Helsinki
TACFI	FIDIP3242-12	jka06-02728		BOLD:ACO3980	jka06-02728	658[0n]	2		1					2006-07-24	Ceromya silacea	A			University of Helsinki
TACFI	FIDIP3243-12	jka06-02284			jka06-02284	429[0n]	2		1					2006-07-27	Ceromya silacea	A			University of Helsinki
TACFI	FIDIP3244-12	jka09-04687		BOLD:ABV4561	jka09-04687	658[0n]	2		1					2009-08-05	Actia lamia	A			University of Helsinki
TACFI	FIDIP3245-12	jka06-00491			jka06-00491	0[n]	2		1					2006-06-09	Actia lamia	A			University of Helsinki
TACFI	FIDIP3246-12	JKA12-0955			JKA12-0955	533[0n]	2		1					2002-07-12	Ceranthia abdominalis	A			University of Helsinki
TACFI	FIDIP3247-12	JKA12-0956		BOLD:AAM7892	JKA12-0956	658[0n]	2		1					2002-06-05	Ceranthia lichtwardtiana	A			University of Helsinki
TACFI	FIDIP3248-12	jka07-06830		BOLD:ACD3758	jka07-06830	658[0n]	2		1					2007-05-27	Siphona pauciseta	A			University of Helsinki	::taxonomy:Identified as boreata by Christer Bergstroem. Seems to be a dark knee form of pauciseta. Antenna too short for boreata male and not widened apically!::endTaxonomy:
TACFI	FIDIP3249-12	jka07-01818		BOLD:ACD3758	jka07-01818	658[0n]	2		1					2007-06-15	Siphona pauciseta	A			University of Helsinki	::taxonomy:Identified as boreata by Christer Bergstroem. Seems to be dark knee form of pauciseta.::endTaxonomy:
TACFI	FIDIP3250-12	JKA12-0957			JKA12-0957	0[n]	2		1					2004-07-08	Siphona boreata	A			University of Helsinki	Identifiers:J. Kahanpaeae, Stig Andersen
TACFI	FIDIP3251-12	jka07-04069		BOLD:ACD3758	jka07-04069	658[0n]	2		1					2007-06-11	Siphona pauciseta	A			University of Helsinki	::taxonomy:Identified as boreata by Christer Bergstroem::endTaxonomy:
TACFI	FIDIP3252-12	jka06-02381			jka06-02381	0[n]	2		1					2006-07-15	Siphona boreata	A			University of Helsinki
TACFI	FIDIP3253-12	jka09-05832		BOLD:ACB0218	jka09-05832	658[0n]	2		1					2009-08-06	Siphona collini	A			University of Helsinki
TACFI	FIDIP3254-12	jka06-00482		BOLD:ACB0218	jka06-00482	658[0n]	2		1					2006-06-09	Siphona collini	A			University of Helsinki
TACFI	FIDIP3255-12	jka-05-00342			jka-05-00342	388[0n]	2		1					2005-06-03	Siphona collini	A			University of Helsinki
TACFI	FIDIP3256-12	JKA12-0958		BOLD:ACD1201	JKA12-0958	538[0n]	2		1					2003-06-15	Siphona confusa	A			University of Helsinki	Identifiers:J. Kahanpaeae, Stig Andersen
TACFI	FIDIP3257-12	JKA12-0959			JKA12-0959	0[n]	2		1					2003-05-14	Siphona confusa	A			University of Helsinki
TACFI	FIDIP3258-12	jka07-06566		BOLD:ACD1201	jka07-06566	658[0n]	2		1					2007-06-02	Siphona confusa	A			University of Helsinki	variata?
TACFI	FIDIP3259-12	jka06-00334		BOLD:ACD1201	jka06-00334	658[0n]	2		1					2006-06-16	Siphona confusa	A			University of Helsinki
TACFI	FIDIP3260-12	jka06-02638		BOLD:AAG2433	jka06-02638	618[0n]	2		1					2006-07-27	Siphona flavifrons	A			University of Helsinki
TACFI	FIDIP3261-12	JKA12-0960		BOLD:AAG2433	JKA12-0960	635[0n]	2		1					2002-07-12	Siphona flavifrons	A			University of Helsinki	Identifiers:J. Kahanpaeae, Stig Andersen
TACFI	FIDIP3262-12	jka06-02375		BOLD:AAG2433	jka06-02375	629[0n]	2		1					2006-07-15	Siphona flavifrons	A			University of Helsinki
TACFI	FIDIP3263-12	jka06-02692		BOLD:AAG2433	jka06-02692	504[0n]	2		1					2006-07-24	Siphona flavifrons	A			University of Helsinki
TACFI	FIDIP3264-12	jka06-01416			jka06-01416	0[n]	2		1					2006-07-08	Siphona geniculata	A			University of Helsinki
TACFI	FIDIP3265-12	jka07-03528		BOLD:AAG2108	jka07-03528	579[0n]	2		1					2007-06-14	Siphona geniculata	A			University of Helsinki
TACFI	FIDIP3266-12	jka06-00799			jka06-00799	0[n]	2		1					2006-06-10	Siphona geniculata	A			University of Helsinki
TACFI	FIDIP3267-12	jka-05-04538		BOLD:AAG2108	jka-05-04538	537[0n]	2		1					2005-09-01	Siphona geniculata	A			University of Helsinki
TACFI	FIDIP3268-12	JKA12-0961		BOLD:ACB0069	JKA12-0961	658[0n]	2		1					2003-05-30	Siphona ingerae	A			University of Helsinki	kuivaketo
TACFI	FIDIP3269-12	jka07-06463		BOLD:ACB0069	jka07-06463	606[0n]	2		1					2007-05-29	Siphona ingerae	A			University of Helsinki
TACFI	FIDIP3270-12	JKA12-0962			JKA12-0962	0[n]	2		1					2002-07-08	Siphona hokkaidensis	A			University of Helsinki	Identifiers:J. Kahanpaeae, C. Bergstroem
TACFI	FIDIP3271-12	jka07-01836			jka07-01836	0[n]	2		1					2007-06-15	Siphona maculata	A			University of Helsinki
TACFI	FIDIP3272-12	jka-05-00258			jka-05-00258	0[n]	2		1					2005-06-02	Siphona maculata	A			University of Helsinki
TACFI	FIDIP3273-12	JKA12-0965			JKA12-0965	0[n]	2		1					2004-07-09	Siphona paludosa	A			University of Helsinki
TACFI	FIDIP3274-12	jka-05-03391		BOLD:ACA9865	jka-05-03391	658[0n]	2		1					2005-07-04	Siphona paludosa	A			University of Helsinki
TACFI	FIDIP3275-12	JKA12-0966		BOLD:ACA9865	JKA12-0966	658[0n]	2		1					2002-06-23	Siphona paludosa	A			University of Helsinki
TACFI	FIDIP3276-12	JKA12-0964		BOLD:ACA9865	JKA12-0964	658[0n]	2		1					2002-07-13	Siphona paludosa	A			University of Helsinki
TACFI	FIDIP3277-12	jka-05-03360			jka-05-03360	0[n]	2		1					2005-07-04	Siphona pauciseta	A			University of Helsinki
TACFI	FIDIP3278-12	jka-05-00763		BOLD:ACD3758	jka-05-00763	582[0n]	2		1					2005-06-12	Siphona pauciseta	A			University of Helsinki
TACFI	FIDIP3279-12	JKA12-0963			JKA12-0963	0[n]	2		1					2002-09-08	Siphona pauciseta	A			University of Helsinki	Joutomaa-alue Identifiers:J. Kahanpaeae, C. Bergstroem
TACFI	FIDIP3280-12	jka07-03390			jka07-03390	0[n]	2		1					2007-08-12	Siphona rossica	A			University of Helsinki
TACFI	FIDIP3281-12	jka07-03842		BOLD:ACD1409	jka07-03842	658[0n]	2		1					2007-08-31	Siphona setosa	A			University of Helsinki
TACFI	FIDIP3282-12	jka07-05555			jka07-05555	511[0n]	2		1					2007-10-04	Siphona setosa	A			University of Helsinki
TACFI	FIDIP3283-12	jka09-05417		BOLD:AAV7830	jka09-05417	614[0n]	2		1					2009-08-05	Leskia aurea	A			University of Helsinki
TACFI	FIDIP3284-12	jka07-03328		BOLD:AAV8821	jka07-03328	658[0n]	2		1					2007-06-12	Solieria pacifica	A			University of Helsinki	::taxonomy:Was originally identified as inanis::endTaxonomy:
TACFI	FIDIP3285-12	jka10-01368		BOLD:AAU3837	jka10-01368	658[0n]	2		1					2010-07-13	Trixa caerulescens	A			University of Helsinki
TACFI	FIDIP3286-12	jka10-02736		BOLD:AAU3837	jka10-02736	658[0n]	2		1					2010-06-29	Trixa caerulescens	A			University of Helsinki
TACFI	FIDIP3287-12	jka10-02151		BOLD:AAU3837	jka10-02151	658[0n]	2		1					2010-07-01	Trixa caerulescens	A			University of Helsinki
TACFI	FIDIP3288-12	JKA12-0967			JKA12-0967	0[n]	2		1					2004-06-23	Dinera grisescens	A			University of Helsinki
TACFI	FIDIP3289-12	JKA12-0968			JKA12-0968	0[n]	2		1					2002-06-15	Dinera grisescens	A			University of Helsinki	Hiekkakuoppa
TACFI	FIDIP3290-12	jka06-01776		BOLD:ACD1182	jka06-01776	658[0n]	2		1					2006-07-24	Prosena siberita	A			University of Helsinki
TACFI	FIDIP3291-12	JKA12-0969		BOLD:AAV7115	JKA12-0969	658[0n]	2		1					2002-07-07	Eriothrix rufomaculatus	A			University of Helsinki
TACFI	FIDIP3292-12	jka06-01153			jka06-01153	498[0n]	2		1					2006-07-05	Trafoia monticola	A			University of Helsinki
TACFI	FIDIP3293-12	jka10-02269		BOLD:ACD3627	jka10-02269	658[0n]	2		1					2010-06-28	Campylocheta inepta	A			University of Helsinki
TACFI	FIDIP3294-12	JKA12-0971			JKA12-0971	0[n]	2		1					2002-07-12	Campylocheta inepta	A			University of Helsinki
TACFI	FIDIP3295-12	jka10-02524		BOLD:ACD3627	jka10-02524	658[0n]	2		1					2010-06-29	Campylocheta inepta	A			University of Helsinki
TACFI	FIDIP3296-12	JKA12-0972			JKA12-0972	0[n]	2		1					2002-07-07	Campylocheta inepta	A			University of Helsinki
TACFI	FIDIP3297-12	jka10-02249		BOLD:ABZ2498	jka10-02249	658[0n]	2		1					2010-06-28	Blepharomyia angustifrons	A			University of Helsinki
TACFI	FIDIP3299-12	jka08-00014		BOLD:ACD3587	jka08-00014	658[0n]	2		1					2008-06-24	Blepharomyia piliceps	A			University of Helsinki
TACFI	FIDIP3300-12	jka10-02208		BOLD:ACA9927	jka10-02208	658[0n]	2		1					2010-06-28	Athrycia trepida	A			University of Helsinki
TACFI	FIDIP3301-12	jka08-00649		BOLD:ACA9927	jka08-00649	658[0n]	2		1					2008-06-23	Athrycia trepida	A			University of Helsinki
TACFI	FIDIP3302-12	jka-05-00788			jka-05-00788	299[0n]	2		1					2005-06-12	Cyrtophleba ruricola	A			University of Helsinki
TACFI	FIDIP3303-12	jka06-00285		BOLD:ACD3589	jka06-00285	658[0n]	2		1					2006-06-16	Cyrtophleba ruricola	A			University of Helsinki
TACFI	FIDIP3304-12	jka06-00502		BOLD:ACD3386	jka06-00502	606[0n]	2		1					2006-06-09	Dufouria nigrita	A			University of Helsinki
TACFI	FIDIP3305-12	jka08-00075			jka08-00075	0[n]	2		1					2008-06-24	Rondania fasciata	A			University of Helsinki
TACFI	FIDIP3306-12	JKA12-0974			JKA12-0974	0[n]	2		1					2004-06-09	Rondania fasciata	A			University of Helsinki
TACFI	FIDIP3307-12	JKA12-0975		BOLD:ACB0186	JKA12-0975	658[0n]	2		1					2002-08-22	Microsoma exiguum	A			University of Helsinki	Joutomaa-alue
TACFI	FIDIP3386-12	jka-05-02932		BOLD:ACO3996	jka-05-02932	658[0n]	2		1					2005-08-03	Gymnosoma dolycoridis	A			University of Helsinki
TACFI	FIDIP3387-12	JKA12-0978		BOLD:ACD1263	JKA12-0978	658[0n]	2		1					2003-06-25	Cleonice keteli	A			University of Helsinki	Open meadow Identifiers:J. Kahanpaeae, C. Bergstroem
TACFI	FIDIP3388-12	JKA12-0980			JKA12-0980	0[n]	2		1					2004-06-24	Actia crassicornis	A			University of Helsinki
TACFI	FIDIP3389-12	JKA12-0981		BOLD:ACD1409	JKA12-0981	658[0n]	2		1					2002-07-12	Siphona setosa	A			University of Helsinki	Identifiers:J. Kahanpaeae, Stig Andersen
TACFI	FIDIP3390-12	jka06-01317		BOLD:ACD1409	jka06-01317	658[0n]	2		1					2006-07-06	Siphona setosa	A			University of Helsinki
TACFI	TACFI286-12	JP00601		BOLD:ACA6555	JP00601	618[0n]	2		1					2005-07-01	Gymnocheta viridis	A			Tampere Museum of Natural History
TACFI	TACFI287-12	JP00602			JP00602	0[n]	2		1					2008-05-29	Gymnocheta viridis	A			Tampere Museum of Natural History
TACFI	TACFI288-12	JP00603		BOLD:ACF3891	JP00603	658[0n]	2		1					2007-07-24	Gymnocheta	A			Tampere Museum of Natural History	Period: Jul-24-2007 - Sep-03-2007
TACFI	TACFI289-12	JP00604		BOLD:ACF3891	JP00604	658[0n]	2		1					2007-07-12	Gymnocheta	A			Tampere Museum of Natural History
TACFI	TACFI290-12	JP00605		BOLD:ACF3891	JP00605	578[0n]	2		1					2004-06-13	Gymnocheta	A			Tampere Museum of Natural History
TACFI	TACFI291-12	JP00606		BOLD:ACD1492	JP00606	541[0n]	2		1					2005-06-18	Zophomyia temula	A			Tampere Museum of Natural History
TACFI	TACFI292-12	JP00607			JP00607	0[n]	2		1					2005-07-03	Zophomyia temula	A			Tampere Museum of Natural History
TACFI	TACFI293-12	JP00608			JP00608	0[n]	2		1					2000-06-16	Macquartia tenebricosa	A			Tampere Museum of Natural History	Label 0329
TACFI	TACFI294-12	JP00609			JP00609	0[n]	2		1					2005-07-14	Phytomyptera bohemica	A			Tampere Museum of Natural History	Period: Jul-14-2005 - Jul-27-2005
TACFI	TACFI295-12	JP00610		BOLD:ACD1230	JP00610	632[0n]	2		1					2009-08-15	Phytomyptera cingulata	A			Tampere Museum of Natural History
TACFI	TACFI296-12	JP00611		BOLD:ACD1230	JP00611	658[2n]	2		1					2009-07-16	Phytomyptera cingulata	A			Tampere Museum of Natural History
TACFI	TACFI297-12	JP00612		BOLD:ACD1229	JP00612	658[0n]	2		1					2008-06-30	Phytomyptera minutissima	A			Tampere Museum of Natural History	Period: Jun-30-2008 - Jul-27-2008
TACFI	TACFI298-12	JP00613		BOLD:ACD1229	JP00613	658[0n]	2		1					1999-07-15	Phytomyptera minutissima	A			Tampere Museum of Natural History	Period: Jul-15-1999 - Jul-21-1999: Valorysae
TACFI	TACFI299-12	JP00614		BOLD:ACD1229	JP00614	632[0n]	2		1					2009-07-16	Phytomyptera minutissima	A			Tampere Museum of Natural History
TACFI	TACFI300-12	JP00615		BOLD:ACD1229	JP00615	658[0n]	2		1					2009-07-16	Phytomyptera minutissima	A			Tampere Museum of Natural History
TACFI	TACFI301-12	JP00616		BOLD:ACB0100	JP00616	658[4n]	2		1					2005-08-13	Phytomyptera zonella	A			Tampere Museum of Natural History
TACFI	TACFI302-12	JP00617			JP00617	0[n]	2		1					2001-05-23	Entomophaga sufferta	A			Tampere Museum of Natural History	Label 1303: RN 66371/15998
TACFI	TACFI303-12	JP00618			JP00618	0[n]	2		1					2005-07-27	Entomophaga sufferta	A			Tampere Museum of Natural History	Period: Jul-27-2005 - Aug-12-2005
TACFI	TACFI304-12	JP00619			JP00619	0[n]	2		1					2007-06-29	Ceromya bicolor	A			Tampere Museum of Natural History	Period: Jun-29-2007 - Jul-12-2007
TACFI	TACFI305-12	JP00620			JP00620	0[n]	2		1					2006-07-09	Ceromya bicolor	A			Tampere Museum of Natural History	Period: Jul-09-2006 - Aug-12-2006
TACFI	TACFI306-12	JP00621			JP00621	0[n]	2		1					2008-06-06	Ceromya bicolor	A			Tampere Museum of Natural History	Period: Jun-06-2008 - Jul-24-2008
TACFI	TACFI307-12	JP00622		BOLD:ACO3980	JP00622	633[0n]	2		1					2008-06-06	Ceromya silacea	A			Tampere Museum of Natural History	Period: Jun-06-2008 - Jul-24-2008
TACFI	TACFI308-12	JP00623		BOLD:ACO3980	JP00623	614[0n]	2		1					2006-07-09	Ceromya silacea	A			Tampere Museum of Natural History	Period: Jul-09-2006 - Aug-12-2006
TACFI	TACFI309-12	JP00624			JP00624	0[n]	2		1					2005-06-16	Ceromya silacea	A			Tampere Museum of Natural History	Period: Jun-16-2005 - Jul-12-2005
TACFI	TACFI310-12	JP00625			JP00625	0[n]	2		1					2006-07-09	Ceromya silacea	A			Tampere Museum of Natural History	Period: Jul-09-2006 - Aug-12-2006
TACFI	TACFI311-12	JP00626		BOLD:ACO3980	JP00626	601[0n]	2		1					2005-07-15	Ceromya silacea	A			Tampere Museum of Natural History	Period: Jul-15-2005 - Jul-28-2005
TACFI	TACFI312-12	JP00627			JP00627	0[n]	2		1					2000-07-12	Actia crassicornis	A			Tampere Museum of Natural History	Period: Jul-12-2000 - Aug-07-2000
TACFI	TACFI313-12	JP00628			JP00628	0[n]	2		1					2005-08-09	Actia crassicornis	A			Tampere Museum of Natural History
TACFI	TACFI314-12	JP00629		BOLD:ACD1290	JP00629	650[0n]	2		1					2004-08-04	Actia nigroscutellata	A			Tampere Museum of Natural History
TACFI	TACFI315-12	JP00630			JP00630	0[n]	2		1					2003-07-22	Actia pilipennis	A			Tampere Museum of Natural History	Period: Jul-22-2003 - Aug-21-2003
TACFI	TACFI316-12	JP00631			JP00631	0[n]	2		1					2003-07-22	Aphantorhaphopsis samarensis	A			Tampere Museum of Natural History	Period: Jul-22-2003 - Aug-21-2003
TACFI	TACFI317-12	JP00632		BOLD:ACC5905	JP00632	658[0n]	2		1					2005-06-19	Siphona boreata	A			Tampere Museum of Natural History	Period: Jun-19-2005 - Jun-25-2005: Malaise
TACFI	TACFI318-12	JP00633		BOLD:ACC5905	JP00633	580[0n]	2		1					2005-06-27	Siphona boreata	A			Tampere Museum of Natural History	Period: Jun-27-2005 - Jun-30-2005
TACFI	TACFI319-12	JP00634			JP00634	0[n]	2		1					2005-07-04	Siphona boreata	A			Tampere Museum of Natural History
TACFI	TACFI320-12	JP00635		BOLD:ACB0218	JP00635	658[0n]	2		1					2005-08-31	Siphona collini	A			Tampere Museum of Natural History
TACFI	TACFI321-12	JP00636		BOLD:ACD1201	JP00636	658[0n]	2		1					2005-06-12	Siphona confusa	A			Tampere Museum of Natural History
TACFI	TACFI322-12	JP00637		BOLD:ACA9865	JP00637	625[0n]	2		1					2007-07-02	Siphona paludosa	A			Tampere Museum of Natural History
TACFI	TACFI323-12	JP00638		BOLD:AAG2108	JP00638	658[0n]	2		1					2008-06-27	Siphona geniculata	A			Tampere Museum of Natural History
TACFI	TACFI324-12	JP00639		BOLD:AAG2433	JP00639	561[0n]	2		1					2004-07-16	Siphona flavifrons	A			Tampere Museum of Natural History
TACFI	TACFI325-12	JP00640		BOLD:AAG2433	JP00640	614[0n]	2		1					2005-07-27	Siphona flavifrons	A			Tampere Museum of Natural History
TACFI	TACFI326-12	JP00641			JP00641	0[n]	2		1					2004-07-16	Siphona flavifrons	A			Tampere Museum of Natural History
TACFI	TACFI327-12	JP00642		BOLD:AAG2172	JP00642	392[0n]	2		1					2002-07-05	Siphona hokkaidensis	A			Tampere Museum of Natural History	Label 2295: RN 65789/314100
TACFI	TACFI328-12	JP00643			JP00643	0[n]	2		1					2005-05-22	Siphona maculata	A			Tampere Museum of Natural History	Period: May-22-2005 - Jun-19-2005
TACFI	TACFI329-12	JP00644		BOLD:ACB0218	JP00644	653[0n]	2		1					2007-05-13	Siphona maculata	A			Tampere Museum of Natural History
TACFI	TACFI330-12	JP00645		BOLD:ACA9865	JP00645	658[0n]	2		1					2008-06-27	Siphona paludosa	A			Tampere Museum of Natural History
TACFI	TACFI331-12	JP00646		BOLD:ACA9865	JP00646	658[0n]	2		1					2005-08-07	Siphona paludosa	A			Tampere Museum of Natural History
TACFI	TACFI332-12	JP00647		BOLD:ACA9865	JP00647	648[0n]	2		1					2005-08-07	Siphona paludosa	A			Tampere Museum of Natural History
TACFI	TACFI333-12	JP00648		BOLD:ACA9865	JP00648	658[0n]	2		1					2005-06-27	Siphona paludosa	A			Tampere Museum of Natural History	Period: Jun-27-2005 - Jun-30-2005
TACFI	TACFI334-12	JP00649		BOLD:ACD1409	JP00649	658[0n]	2		1					2007-07-12	Siphona setosa	A			Tampere Museum of Natural History	Period: Jul-12-2007 - Jul-29-2007
TACFI	TACFI335-12	JP00650			JP00650	0[n]	2		1					2005-07-12	Siphona setosa	A			Tampere Museum of Natural History	Period: Jul-12-2005 - Aug-02-2005
TACFI	TACFI336-12	JP00651		BOLD:ACD1409	JP00651	648[0n]	2		1					2005-07-27	Siphona setosa	A			Tampere Museum of Natural History
TACFI	TACFI337-12	JP00652			JP00652	403[0n]	2		1					2004-07-16	Siphona subarctica	A			Tampere Museum of Natural History
TACFI	TACFI338-12	JP00653			JP00653	0[n]	2		1					2005-07-12	Siphona nr. variata	A			Tampere Museum of Natural History	Period: Jul-12-2005 - Aug-02-2005
TACFI	TACFI339-12	JP00654			JP00654	0[n]	2		1					2005-05-22	Siphona ingerae	A			Tampere Museum of Natural History	Period: May-22-2005 - Jun-19-2005
TACFI	TACFI340-12	JP00655		BOLD:AAZ3904	JP00655	339[0n]	2		1					2007-07-02	Dinera grisescens	A			Tampere Museum of Natural History
TACFI	TACFI341-12	JP00656			JP00656	0[n]	2		1					2006-07-23	Dinera grisescens	A			Tampere Museum of Natural History
TACFI	TACFI342-12	JP00657			JP00657	0[n]	2		1					2008-06-27	Dinera grisescens	A			Tampere Museum of Natural History
TACFI	TACFI343-12	JP00658		BOLD:AAN4006	JP00658	635[0n]	2		1						Billaea irrorata	A			Tampere Museum of Natural History	ex Saperda populnea
TACFI	TACFI344-12	JP00659		BOLD:AAW3520	JP00659	658[0n]	2		1					2005-07-26	Billaea triangulifera	A			Tampere Museum of Natural History
TACFI	TACFI345-12	JP00660		BOLD:AAW3520	JP00660	647[0n]	2		1					2005-07-31	Billaea triangulifera	A			Tampere Museum of Natural History
TACFI	TACFI346-12	JP00661			JP00661	0[n]	2		1					2005-08-09	Billaea triangulifera	A			Tampere Museum of Natural History
TACFI	TACFI347-12	JP00662		BOLD:AAX7871	JP00662	658[0n]	2		1					2006-07-23	Prosena siberita	A			Tampere Museum of Natural History
TACFI	TACFI348-12	JP00663		BOLD:ACD1182	JP00663	658[0n]	2		1					2008-06-27	Prosena siberita	A			Tampere Museum of Natural History
TACFI	TACFI349-12	JP00664			JP00664	0[n]	2		1					2005-07-15	Campylocheta inepta	A			Tampere Museum of Natural History	Period: Jul-15-2005 - Jul-28-2005
TACFI	TACFI350-12	JP00665			JP00665	0[n]	2		1					2008-05-25	Campylocheta inepta	A			Tampere Museum of Natural History	Period: May-25-2008 - Jun-30-2008
TACFI	TACFI351-12	JP00666			JP00666	0[n]	2		1					2008-06-30	Campylocheta inepta	A			Tampere Museum of Natural History
TACFI	TACFI352-12	JP00667			JP00667	0[n]	2		1					2007-06-17	Campylocheta inepta	A			Tampere Museum of Natural History	Period: Jun-17-2007 - Jun-29-2007
TACFI	TACFI353-12	JP00668		BOLD:AAW8288	JP00668	647[0n]	2		1					2006-05-06	Campylocheta praecox	A			Tampere Museum of Natural History
TACFI	TACFI354-12	JP00669			JP00669	0[n]	2		1					2006-05-21	Campylocheta praecox	A			Tampere Museum of Natural History
TACFI	TACFI355-12	JP00670		BOLD:ABZ2498	JP00670	658[0n]	2		1					2008-06-30	Blepharomyia pagana	A			Tampere Museum of Natural History
TACFI	TACFI356-12	JP00671			JP00671	0[n]	2		1					2007-06-17	Blepharomyia pagana	A			Tampere Museum of Natural History	Period: Jun-17-2007 - Jun-29-2007
TACFI	TACFI357-12	JP00672		BOLD:ABZ2498	JP00672	658[0n]	2		1					2008-05-07	Blepharomyia angustifrons	A			Tampere Museum of Natural History	Period: May-07-2008 - Jun-06-2008
TACFI	TACFI358-12	JP00673		BOLD:AAY0450	JP00673	658[0n]	2		1					2008-05-17	Periscepsia ringdahli	A			Tampere Museum of Natural History	Period: May-17-2008 - Jun-19-2008
TACFI	TACFI359-12	JP00674			JP00674	0[n]	2		1					2000-07-12	Periscepsia ringdahli	A			Tampere Museum of Natural History	Period: Jul-12-2000 - Aug-07-2000
TACFI	TACFI360-12	JP00675		BOLD:AAY0450	JP00675	544[0n]	2		1					2000-07-12	Periscepsia ringdahli	A			Tampere Museum of Natural History	Period: Jul-12-2000 - Aug-07-2000
TACFI	TACFI361-12	JP00676		BOLD:AAY0450	JP00676	658[0n]	2		1					2007-05-26	Periscepsia ringdahli	A			Tampere Museum of Natural History	Period: May-26-2007 - Jun-17-2007
TACFI	TACFI362-12	JP00677		BOLD:AAY0450	JP00677	632[0n]	2		1					2007-05-09	Periscepsia ringdahli	A			Tampere Museum of Natural History	May-09-2007 - May-12-2007: ex Noctuidae ex Pupa
TACFI	TACFI363-12	JP00678		BOLD:AAY0209	JP00678	658[0n]	2		1					2007-07-24	Loewia erecta	A			Tampere Museum of Natural History	Period: Jul-24-2007 - Sep-03-2007
TACFI	TACFI364-12	JP00679		BOLD:ACB0149	JP00679	658[0n]	2		1					2007-07-17	Athrycia curvinervis	A			Tampere Museum of Natural History
TACFI	TACFI365-12	JP00680		BOLD:ACE3859	JP00680	658[0n]	2		1						Athrycia impressa	A			Tampere Museum of Natural History	Period: 2007-2008: e Noctuidae larva on Betula pubescens
TACFI	TACFI366-12	JP00681		BOLD:ACE3859	JP00681	556[0n]	2		1					2007-07-12	Athrycia impressa	A			Tampere Museum of Natural History	Period: Jul-12-2007 - Jul-29-2007
TACFI	TACFI367-12	JP00682		BOLD:ACE3859	JP00682	658[0n]	2		1					2008-07-27	Athrycia impressa	A			Tampere Museum of Natural History
TACFI	TACFI368-12	JP00683		BOLD:ACA9927	JP00683	633[0n]	2		1					2008-05-29	Athrycia trepida	A			Tampere Museum of Natural History
TACFI	TACFI369-12	JP00684		BOLD:ACA9927	JP00684	632[0n]	2		1					2005-06-25	Athrycia trepida	A			Tampere Museum of Natural History
TACFI	TACFI370-12	JP00685		BOLD:AAP3780	JP00685	627[1n]	2		1					2006-04-29	Cyrtophleba vernalis	A			Tampere Museum of Natural History
TACFI	TACFI371-12	JP00686		BOLD:AAP3780	JP00686	658[0n]	2		1					2008-05-03	Cyrtophleba vernalis	A			Tampere Museum of Natural History
TACFI	TACFI372-12	JP00687		BOLD:AAP3780	JP00687	658[0n]	2		1					2007-04-16	Cyrtophleba vernalis	A			Tampere Museum of Natural History
TACFI	TACFI373-12	JP00688		BOLD:AAY1554	JP00688	658[0n]	2		1					2005-07-27	Phyllomya volvulus	A			Tampere Museum of Natural History
TACFI	TACFI374-12	JP00689		BOLD:AAY1554	JP00689	658[0n]	2		1					2006-07-06	Phyllomya volvulus	A			Tampere Museum of Natural History
TACFI	TACFI375-12	JP00690		BOLD:ACD1435	JP00690	622[0n]	2		1					2003-07-18	Thelaira nigrina	A			Tampere Museum of Natural History	f.1
TACFI	TACFI376-12	JP00691		BOLD:ACD1435	JP00691	647[0n]	2		1					2004-08-07	Thelaira nigrina	A			Tampere Museum of Natural History	f.2
TACFI	TACFI377-12	JP00692		BOLD:ACD1435	JP00692	624[0n]	2		1					2004-08-01	Thelaira nigrina	A			Tampere Museum of Natural History	f.2
TACFI	TACFI378-12	JP00693		BOLD:AAG6853	JP00693	658[0n]	2		1					2006-06-11	Thelaira solivaga	A			Tampere Museum of Natural History	Period: Jun-11-2006 - Jun-23-2006
TACFI	TACFI379-12	JP00694		BOLD:AAG6853	JP00694	620[0n]	2		1					2006-06-11	Thelaira solivaga	A			Tampere Museum of Natural History	Period: Jun-11-2006 - Jun-23-2006
TACFI	TACFI380-12	JP00695		BOLD:ACD1507	JP00695	633[0n]	2		1					2011-07-06	Halidaya aurea	A			Tampere Museum of Natural History
TACFI	TACFI381-12	JP00701			JP00701	0[n]	2		1					2005-06-11	Rondania fasciata	A			Tampere Museum of Natural History
TACFI	TACFI382-12	JP00702			JP00702	0[n]	2		1					2005-06-30	Dufouria nigrita	A			Tampere Museum of Natural History
TACFI	TACFI383-12	JP00703		BOLD:AAY0214	JP00703	550[3n]	2		1					2005-06-19	Dufouria chalybeata	A			Tampere Museum of Natural History
TACFI	TACFI384-12	JP00704		BOLD:AAY0214	JP00704	658[0n]	2		1					2004-06-05	Dufouria chalybeata	A			Tampere Museum of Natural History
TACFI	TACFI385-12	JP00705		BOLD:ACD3386	JP00705	658[0n]	2		1					2004-07-14	Dufouria nigrita	A			Tampere Museum of Natural History
TACFI	TACFI386-12	JP00706		BOLD:AAX4213	JP00706	658[0n]	2		1					2007-07-08	Microsoma exiguum	A			Tampere Museum of Natural History
TACFI	TACFI387-12	JP00707		BOLD:ACB0186	JP00707	658[0n]	2		1					2009-07-23	Microsoma exiguum	A			Tampere Museum of Natural History	Period: Jul-23-2009 - Aug-09-2009
TACFI	TACFI388-12	JP00708		BOLD:AAY0449	JP00708	658[0n]	2		1					2012-05-17	Periscepsia spathulata	A			Tampere Museum of Natural History
TACFI	TACFI389-12	JP00709		BOLD:ACD3085	JP00709	658[0n]	2		1					2012-05-03	Labigastera nitidula	A			Tampere Museum of Natural History
TACFI	TACFI390-12	JP00710		BOLD:AAN4077	JP00710	658[0n]	2		1					2011-09-10	Blondelia nigripes	A			Tampere Museum of Natural History
TACFI	TACFI391-12	JP00711		BOLD:AAN9761	JP00711	658[0n]	2		1					2011-08-14	Meigenia mutabilis	A			Tampere Museum of Natural History
TACFI	TACFI392-12	JP00712		BOLD:AAN4077	JP00712	658[0n]	2		1					2011-08-20	Blondelia nigripes	A			Tampere Museum of Natural History
TACFI	TACFI393-12	JP00713		BOLD:ACO3995	JP00713	658[0n]	2		1					2011-04-24	Phorocera obscura	A			Tampere Museum of Natural History
TACFI	TACFI394-12	JP00714		BOLD:ACD3359	JP00714	658[0n]	2		1					2011-07-10	Erycia fatua	A			Tampere Museum of Natural History
TACFI	TACFI395-12	JP00715		BOLD:AAC1602	JP00715	658[0n]	2		1					2011-05-29	Eumea linearicornis	A			Tampere Museum of Natural History
TACFI	TACFI396-12	JP00716		BOLD:ABW1716	JP00716	658[0n]	2		1					2007-07-21	Tlephusa cincinna	A			Tampere Museum of Natural History
TACFI	TACFI397-12	JP00717		BOLD:AAP8660	JP00717	658[0n]	2		1						Hubneria affinis	A			Tampere Museum of Natural History	Collection Date: 5.2012: e.l. Arctia caja
TACFI	TACFI398-12	JP00718		BOLD:ACO3992	JP00718	658[0n]	2		1					2012-06-23	Triarthria setipennis	A			Tampere Museum of Natural History
TACFI	TACFI399-12	JP00719			JP00719	0[n]	2		1					2007-07-26	Actia crassicornis	A			Tampere Museum of Natural History	Period: Jul-26-2007 - Sep-04-2007
TACFI	TACFI400-12	JP00720		BOLD:ACD3168	JP00720	658[0n]	2		1					2007-07-26	Actia crassicornis	A			Tampere Museum of Natural History	Period: Jul-26-2007 - Aug-29-2007
TACFI	TACFI401-12	JP00721		BOLD:ACO3981	JP00721	658[0n]	2		1					2011-07-11	Actia pilipennis	A			Tampere Museum of Natural History
TACFI	TACFI402-12	JP00722		BOLD:ACO3981	JP00722	658[0n]	2		1					2010-07-18	Actia pilipennis	A			Tampere Museum of Natural History
TACFI	TACFI403-12	JP00723			JP00723	0[n]	2		1					2007-08-02	Actia pilipennis	A			Tampere Museum of Natural History	Period: Aug-02-2007 - Sep-01-2007
TACFI	TACFI404-12	JP00724		BOLD:AAG2108	JP00724	658[0n]	2		1					2011-08-06	Siphona geniculata	A			Tampere Museum of Natural History
TACFI	TACFI405-12	JP00725			JP00725	0[n]	2		1					2008-06-20	Siphona confusa	A			Tampere Museum of Natural History
TACFI	TACFI406-12	JP00726		BOLD:AAG2108	JP00726	658[0n]	2		1					2011-06-12	Siphona geniculata	A			Tampere Museum of Natural History
TACFI	TACFI407-12	JP00727		BOLD:AAG2108	JP00727	658[0n]	2		1					2011-08-14	Siphona geniculata	A			Tampere Museum of Natural History
TACFI	TACFI408-12	JP00728		BOLD:ACO3977	JP00728	658[0n]	2		1					2012-05-17	Panzeria rudis	A			Tampere Museum of Natural History
TACFI	TACFI409-12	JP00729		BOLD:ACA6555	JP00729	658[0n]	2		1					2012-04-06	Gymnocheta viridis	A			Tampere Museum of Natural History
TACFI	TACFI410-12	JP00730		BOLD:ACA6555	JP00730	658[0n]	2		1					2011-04-10	Gymnocheta viridis	A			Tampere Museum of Natural History
TACFI	TACFI411-12	JP00731		BOLD:ACO3985	JP00731	658[0n]	2		1					2012-08-04	Voria ruralis	A			Tampere Museum of Natural History
TACFI	TACFI413-12	JP00733		BOLD:AAN9586	JP00733	658[0n]	2		1					2012-08-03	Macquartia tenebricosa	A			Tampere Museum of Natural History
TACFI	TACFI414-12	JP00734		BOLD:ACB0186	JP00734	658[0n]	2		1					2011-07-15	Microsoma exiguum	A			Tampere Museum of Natural History
TACFI	TACFI415-12	JP00735		BOLD:ACB0186	JP00735	658[0n]	2		1					2010-07-03	Microsoma exiguum	A			Tampere Museum of Natural History
TACFI	TACFI416-12	JP00736		BOLD:ACD3213	JP00736	658[0n]	2		1					2010-07-11	Rondania nr. dimidiata	A			Tampere Museum of Natural History	On own label: 6
TACFI	TACFI417-12	JP00737		BOLD:AAG2108	JP00737	658[0n]	2		1					2012-05-20	Siphona geniculata	A			Tampere Museum of Natural History
TACFI	TACFI418-12	JP00738		BOLD:AAP8653	JP00738	658[0n]	2		1					2007-09-06	Lydella stabulans	A			Tampere Museum of Natural History	On own label: 10
TACFI	TACFI419-12	JP00739		BOLD:AAV0907	JP00739	658[0n]	2		1					2011-05-10	Macquartia viridana	A			Tampere Museum of Natural History	On own label: 1
TACFI	TACFI420-12	JP00740			JP00740	0[n]	2		1					2005-06-19	Ceranthia tenuipalpis	A			Tampere Museum of Natural History	Period: Jun-19-2005 - Jul-12-2005: Malaise
TACFI	TACFI421-12	JP00741			JP00741	0[n]	2		1					2007-05-15	Ceranthia lichtwardtiana	A			Tampere Museum of Natural History	Period: May-15-2007 - Jun-29-2007
TACFI	TACFI422-12	JP00742			JP00742	0[n]	2		1					2005-06-19	Aphantorhaphopsis samarensis	A			Tampere Museum of Natural History	Period: Jun-19-2005 - Jul-12-2005
TACFI	TACFI423-12	JP00743			JP00743	0[n]	2		1					2012-08-18	Peribaea tibialis	A			Tampere Museum of Natural History
TACFI	TACFI424-12	JP00744		BOLD:AAG2108	JP00744	658[0n]	2		1					2012-07-01	Siphona geniculata	A			Tampere Museum of Natural History
TACFI	TACFI425-12	JP00745		BOLD:AAG2108	JP00745	658[0n]	2		1					2012-08-04	Siphona geniculata	A			Tampere Museum of Natural History
TACFI	TACFI426-12	JP00746		BOLD:AAG2108	JP00746	658[0n]	2		1					2012-06-23	Siphona geniculata	A			Tampere Museum of Natural History
TACFI	TACFI427-12	JP00747		BOLD:AAG2108	JP00747	658[0n]	2		1					2012-07-07	Siphona geniculata	A			Tampere Museum of Natural History
TACFI	TACFI428-12	JP00748		BOLD:AAG2108	JP00748	658[0n]	2		1					2012-06-26	Siphona geniculata	A			Tampere Museum of Natural History
TACFI	TACFI429-12	JP00749		BOLD:ACF5729	JP00749	658[0n]	2		1					2012-08-03	Exorista larvarum	A			Tampere Museum of Natural History
TACFI	TACFI430-12	JP00750		BOLD:AAG2163	JP00750	658[0n]	2		1					2011-08-23	Exorista rustica	A			Tampere Museum of Natural History	On own label: 5: Period: Aug-23-2011 - Aug-25-2011
TACFI	TACFI431-12	JP00751		BOLD:AAG2163	JP00751	658[0n]	2		1					2011-09-03	Exorista rustica	A			Tampere Museum of Natural History
TACFI	TACFI432-12	JP00752		BOLD:AAG2163	JP00752	658[0n]	2		1					2011-08-20	Exorista rustica	A			Tampere Museum of Natural History
TACFI	TACFI433-12	JP00753		BOLD:AAG2163	JP00753	658[0n]	2		1					2012-06-08	Exorista rustica	A			Tampere Museum of Natural History
TACFI	TACFI434-12	JP00754		BOLD:ACB0956	JP00754	658[1n]	2		1					2012-08-04	Gastrolepta anthracina	A			Tampere Museum of Natural History
TACFI	TACFI435-12	JP00755		BOLD:ACD2679	JP00755	658[0n]	2		1					2012-08-04	Medina collaris	A			Tampere Museum of Natural History
TACFI	TACFI436-12	JP00756		BOLD:AAV8345	JP00756	658[0n]	2		1					2012-08-03	Subclytia rotundiventris	A			Tampere Museum of Natural History
TACFI	TACFI437-12	JP00757		BOLD:AAG2311	JP00757	658[0n]	2		1					2011-09-03	Phasia aurulans	A			Tampere Museum of Natural History
TACFI	TACFI438-12	JP00758		BOLD:AAG2311	JP00758	658[0n]	2		1					2011-09-15	Phasia aurulans	A			Tampere Museum of Natural History
TACFI	TACFI439-12	JP00759		BOLD:AAY2276	JP00759	658[0n]	2		1					2012-08-03	Phasia hemiptera	A			Tampere Museum of Natural History
TACFI	TACFI440-12	JP00760		BOLD:AAY2262	JP00760	658[0n]	2		1					2012-06-23	Phasia aurigera	A			Tampere Museum of Natural History
TACFI	TACFI441-12	JP00761		BOLD:AAG2311	JP00761	658[0n]	2		1					2011-08-20	Phasia obesa	A			Tampere Museum of Natural History
TACFI	TACFI442-12	JP00762		BOLD:AAY2270	JP00762	658[0n]	2		1					2012-06-10	Phasia pusilla	A			Tampere Museum of Natural History
TACFI	TACFI443-12	JP00763		BOLD:AAG2311	JP00763	658[0n]	2		1					2012-08-03	Phasia obesa	A			Tampere Museum of Natural History
TACFI	TACFI444-12	JP00764		BOLD:AAV9222	JP00764	658[0n]	2		1					2007-07-13	Cistogaster globosa	A			Tampere Museum of Natural History
TACFI	TACFI445-12	JP00765		BOLD:AAG2144	JP00765	658[0n]	2		1					2012-06-23	Cylindromyia interrupta	A			Tampere Museum of Natural History
TACFI	TACFI446-12	JP00766		BOLD:AAN3295	JP00766	658[0n]	2		1					2012-08-03	Cylindromyia bicolor	A			Tampere Museum of Natural History
TACFI	TACFI447-12	JP00767		BOLD:AAV9203	JP00767	658[0n]	2		1					2011-06-03	Cylindromyia auriceps	A			Tampere Museum of Natural History
TACFI	TACFI448-12	JP00768		BOLD:AAV9202	JP00768	658[0n]	2		1					2011-07-10	Cylindromyia brassicaria	A			Tampere Museum of Natural History
TACFI	TACFI449-12	JP00769		BOLD:AAV9202	JP00769	658[0n]	2		1					2011-05-28	Cylindromyia brassicaria	A			Tampere Museum of Natural History
TACFI	TACFI450-12	JP00770		BOLD:ACD1230	JP00770	658[1n]	2		1					2011-07-25	Phytomyptera cingulata	A			Tampere Museum of Natural History
TACFI	TACFI451-12	JP00771		BOLD:ABV4561	JP00771	658[0n]	2		1					2012-08-04	Actia lamia	A			Tampere Museum of Natural History
TACFI	TACFI452-12	JP00772		BOLD:AAX5469	JP00772	658[0n]	2		1					2012-08-04	Leiophora innoxia	A			Tampere Museum of Natural History
TACFI	TACFI453-12	JP00773		BOLD:ACA6555	JP00773	658[0n]	2		1					2012-05-25	Gymnocheta viridis	A			Tampere Museum of Natural History	Period: May-25-2012 - May-28-2012
TACFI	TACFI454-12	JP00774		BOLD:ABW0151	JP00774	658[0n]	2		1					2012-08-13	Allophorocera ferruginea	A			Tampere Museum of Natural History	Period: Aug-13-2012 - Aug-19-2012
TACFI	TACFI455-12	JP00775		BOLD:ACB0100	JP00775	658[5n]	2		1					2012-07-01	Phytomyptera zonella	A			Tampere Museum of Natural History
TACFI	TACFI456-12	JP00776		BOLD:AAG2433	JP00776	658[0n]	2		1					2011-07-03	Siphona subarctica	A			Tampere Museum of Natural History	::taxonomy:Placed in this species based on yellow 2nd antenna segment, black tegula and short antennae.::endTaxonomy:On own label: 8: Siphona sp. 1
TACFI	TACFI457-12	JP00777		BOLD:AAG2433	JP00777	658[0n]	2		1					2011-07-03	Siphona subarctica	A			Tampere Museum of Natural History	Siphona sp. 2
TACFI	TACFI458-12	JP00778			JP00778	0[n]	2		1					2005-06-19	Oswaldia eggeri	A			Tampere Museum of Natural History	Period: Jun-19-2005 - Jul-12-2005: Old JP00047
TACFI	TACFI459-12	JP00779		BOLD:ACF6755	JP00779	658[0n]	6		1					2007-05-26	Exorista deligata	A			Tampere Museum of Natural History	Period: May-26-2007 - Jun-17-2007: Old JP00032
TACFI	TACFI460-12	JP00780			JP00780	0[n]	2		1					2007-08-02	Ceranthia abdominalis	A			Tampere Museum of Natural History	Period: Aug-02-2007 - Sep-01-2007: Old JP00263
TACFI	TACFI461-12	JP00781			JP00781	0[n]	2		1					2003-07-22	Aphantorhaphopsis samarensis	A			Tampere Museum of Natural History	Old JP00266
TACFI	TACFI462-12	JP00782			JP00782	0[n]	2		1					2007-09-09	Aphantorhaphopsis siphonoides	A			Tampere Museum of Natural History	Old JP00267
TACFI	TACFI463-12	JP00783			JP00783	0[n]	2		1					2003-07-22	Aphantorhaphopsis verralli	A			Tampere Museum of Natural History	Period: Jul-22-2003 - Aug-21-2003: Old JP00268
TACFI	TACFI464-12	JP00784		BOLD:ACB0135	JP00784	658[0n]	2		1					2009-04-26	Panzeria vagans	A			Tampere Museum of Natural History	Old JP00222
TACFI	TACFI465-12	JP00785			JP00785	0[n]	2		1					2005-07-14	Phytomyptera bohemica	A			Tampere Museum of Natural History	Old JP00247
TACFI	TACFI466-12	JP00786		BOLD:ACD3084	JP00786	658[0n]	2		1					2010-07-11	Labigastera forcipata	A			Tampere Museum of Natural History
TACFI	TACFI467-12	JP00787		BOLD:ACD3084	JP00787	658[0n]	2		1					2011-09-03	Labigastera forcipata	A			Tampere Museum of Natural History
TACFI	TACFI468-12	JP00788		BOLD:AAN9761	JP00788	658[0n]	2		1					2010-07-18	Meigenia dorsalis	A			Tampere Museum of Natural History
TACFI	TACFI469-12	JP00789		BOLD:AAG2429	JP00789	658[0n]	2		1						Carcelia lucorum	A			Tampere Museum of Natural History	Collection Date: 5.2012: e.l. Arctia caja
TACFI	TACFI470-12	JP00790		BOLD:AAN9512	JP00790	658[0n]	2		1					2005-07-11	Tachina nr. magnicornis	A			Tampere Museum of Natural History
TACFI	TACFI471-12	JP00791		BOLD:ABW2498	JP00791	658[0n]	2		1					2010-07-31	Tachina fera	A			Tampere Museum of Natural History
TACFI	TACFI472-12	JP00792		BOLD:ABW2498	JP00792	658[0n]	2		1					2011-08-18	Tachina fera	A			Tampere Museum of Natural History
TACFI	TACFI473-12	JP00793		BOLD:ABW2498	JP00793	658[0n]	2		1					2011-08-15	Tachina fera	A			Tampere Museum of Natural History
TACFI	TACFI474-12	JP00794			JP00794	0[n]	2		1						Ligeria angusticornis	A			Tampere Museum of Natural History	Collection Date: e. l. 1985: Old JP00121
TACFI	TACFI475-12	JP00795			JP00795	0[n]	2		1					2000-06-21	Winthemia speciosa	A			Tampere Museum of Natural History	Farbschale gelb K100: Old JP00128
TACFI	TACFI476-12	JP00501		BOLD:AAV8345	JP00501	658[0n]	2		1					2007-07-17	Subclytia rotundiventris	A			Tampere Museum of Natural History
TACFI	TACFI477-12	JP00502			JP00502	0[n]	2		1					2006-05-08	Phasia subcoleoptrata	A			Tampere Museum of Natural History	Period: May-08-2006 - May-31-2006
TACFI	TACFI478-12	JP00503		BOLD:AAY2258	JP00503	658[0n]	2		1					2005-08-27	Phasia barbifrons	A			Tampere Museum of Natural History
TACFI	TACFI479-12	JP00504			JP00504	0[n]	2		1					2007-09-30	Gymnosoma dolycoridis	A			Tampere Museum of Natural History
TACFI	TACFI480-12	JP00505			JP00505	0[n]	2		1					2006-05-08	Phasia subcoleoptrata	A			Tampere Museum of Natural History	Period: May-08-2006 - May-31-2006
TACFI	TACFI481-12	JP00506			JP00506	0[n]	2		1					2000-07-12	Belida angelicae	A			Tampere Museum of Natural History	Period: Jul-12-2000 - Aug-07-2000
TACFI	TACFI482-12	JP00507		BOLD:AAP8652	JP00507	658[0n]	2		1					2009-07-19	Belida angelicae	A			Tampere Museum of Natural History
TACFI	TACFI483-12	JP00508			JP00508	0[n]	2		1					2005-06-19	Diplostichus janitrix	A			Tampere Museum of Natural History
TACFI	TACFI484-12	JP00509			JP00509	0[n]	2		1						Diplostichus janitrix	A			Tampere Museum of Natural History	Collection Date: e.l. 2005: Diprion pini: University of Jyvaeskylae
TACFI	TACFI485-12	JP00510		BOLD:AAN9761	JP00510	658[0n]	2		1					2005-08-09	Meigenia dorsalis	A			Tampere Museum of Natural History
TACFI	TACFI486-12	JP00511			JP00511	0[n]	2		1					2004-07-26	Medina separata	A			Tampere Museum of Natural History
TACFI	TACFI487-12	JP00512		BOLD:ACD2679	JP00512	658[0n]	2		1					2005-07-15	Medina collaris	A			Tampere Museum of Natural History	Period: Jul-15-2005 - Jul-28-2005
TACFI	TACFI488-12	JP00513		BOLD:ACB0809	JP00513	658[0n]	2		1					2005-06-07	Medina	A			Tampere Museum of Natural History
TACFI	TACFI489-12	JP00514		BOLD:AAG6902	JP00514	658[0n]	2		1					2007-07-22	Medina separata	A			Tampere Museum of Natural History	Rehevaen metsaen ja pellon reunavyoehyke pyydystetty kaesin vuohenputken kukilta
TACFI	TACFI490-12	JP00515		BOLD:AAV8535	JP00515	658[0n]	2		1					2007-07-21	Zaira cinerea	A			Tampere Museum of Natural History
TACFI	TACFI491-12	JP00516		BOLD:AAV8535	JP00516	658[0n]	2		1					2008-08-11	Zaira cinerea	A			Tampere Museum of Natural History
TACFI	TACFI492-12	JP00517		BOLD:AAW3422	JP00517	658[0n]	2		1					2009-07-15	Bessa selecta	A			Tampere Museum of Natural History
TACFI	TACFI493-12	JP00518		BOLD:ACD2803	JP00518	658[0n]	2		1					2009-09-04	Winthemia cruentata	A			Tampere Museum of Natural History
TACFI	TACFI494-12	JP00519		BOLD:ACD2803	JP00519	658[0n]	2		1						Winthemia cruentata	A			Tampere Museum of Natural History	Collection Date: 2007: E. larva S. ligustri
TACFI	TACFI495-12	JP00520			JP00520	0[n]	2		1						Admontia blanda	A			Tampere Museum of Natural History
TACFI	TACFI496-12	JP00521		BOLD:AAV9890	JP00521	573[0n]	2		1					2006-07-23	Admontia blanda	A			Tampere Museum of Natural History
TACFI	TACFI497-12	JP00522		BOLD:AAV9893	JP00522	658[0n]	2		1					2007-08-16	Admontia grandicornis	A			Tampere Museum of Natural History
TACFI	TACFI498-12	JP00523		BOLD:AAN4077	JP00523	658[0n]	2		1					2005-08-14	Blondelia nigripes	A			Tampere Museum of Natural History
TACFI	TACFI499-12	JP00524		BOLD:AAN9761	JP00524	658[0n]	2		1					2005-08-13	Meigenia dorsalis	A			Tampere Museum of Natural History
TACFI	TACFI500-12	JP00525		BOLD:ACX8696	JP00525	658[0n]	2		1						Compsilura concinnata	A			Tampere Museum of Natural History	Collection Date: E. O. march 2006
TACFI	TACFI501-12	JP00526		BOLD:ACD2750	JP00526	658[0n]	2		1					2009-07-19	Myxexoristops abietis	A			Tampere Museum of Natural History
TACFI	TACFI502-12	JP00527			JP00527	0[n]	2		1					2007-07-12	Oswaldia spectabilis	A			Tampere Museum of Natural History	Period: Jul-12-2007 - Jul-29-2007
TACFI	TACFI503-12	JP00528		BOLD:AAV0908	JP00528	658[0n]	2		1					2005-07-01	Oswaldia muscaria	A			Tampere Museum of Natural History
TACFI	TACFI504-12	JP00529		BOLD:AAV0908	JP00529	658[0n]	2		1					2007-06-07	Oswaldia muscaria	A			Tampere Museum of Natural History
TACFI	TACFI505-12	JP00530		BOLD:AAV0908	JP00530	658[0n]	2		1					2005-06-24	Oswaldia muscaria	A			Tampere Museum of Natural History
TACFI	TACFI506-12	JP00531			JP00531	0[n]	2		1					1997-07-17	Nemorilla maculosa	A			Tampere Museum of Natural History
TACFI	TACFI507-12	JP00532			JP00532	0[n]	2		1					1997-07-19	Nemorilla maculosa	A			Tampere Museum of Natural History
TACFI	TACFI508-12	JP00533		BOLD:ACO3989	JP00533	658[0n]	2		1						Nemorilla maculosa	A			Tampere Museum of Natural History	Collection Date: e.l. 5.2008: ex pupa
TACFI	TACFI509-12	JP00534		BOLD:ACB0787	JP00534	658[0n]	2		1					2005-06-12	Smidtia amoena	A			Tampere Museum of Natural History
TACFI	TACFI510-12	JP00535		BOLD:ACB0787	JP00535	658[0n]	2		1					2008-06-30	Smidtia amoena	A			Tampere Museum of Natural History
TACFI	TACFI511-12	JP00536		BOLD:ABW1716	JP00536	658[0n]	2		1					2006-07-06	Tlephusa cincinna	A			Tampere Museum of Natural History
TACFI	TACFI512-12	JP00537		BOLD:ACO3982	JP00537	658[0n]	2		1						Bactromyia aurulenta	A			Tampere Museum of Natural History	Collection Date: e.l. 2005
TACFI	TACFI513-12	JP00538		BOLD:ACO3982	JP00538	658[0n]	2		1					2006-07-31	Bactromyia aurulenta	A			Tampere Museum of Natural History
TACFI	TACFI514-12	JP00539		BOLD:ACB0760	JP00539	658[0n]	2		1					2004-08-10	Phebellia stulta	A			Tampere Museum of Natural History
TACFI	TACFI515-12	JP00540		BOLD:ACB0760	JP00540	658[0n]	2		1					2009-07-30	Phebellia stulta	A			Tampere Museum of Natural History
TACFI	TACFI516-12	JP00541		BOLD:ACG6905	JP00541	658[0n]	2		1					2007-07-01	Phebellia glaucoides	A			Tampere Museum of Natural History
TACFI	TACFI517-12	JP00542		BOLD:ACB0824	JP00542	658[0n]	2		1					2009-07-30	Nilea hortulana	A			Tampere Museum of Natural History
TACFI	TACFI518-12	JP00543		BOLD:ACB0824	JP00543	586[2n]	2		1					2008-06-30	Nilea hortulana	A			Tampere Museum of Natural History
TACFI	TACFI519-12	JP00544			JP00544	0[n]	2		1					2004-06-03	Nilea hortulana	A			Tampere Museum of Natural History
TACFI	TACFI520-12	JP00545		BOLD:ACB0824	JP00545	658[0n]	2		1					2004-06-25	Nilea innoxia	A			Tampere Museum of Natural History
TACFI	TACFI521-12	JP00546			JP00546	427[0n]	2		1					2007-07-24	Nilea innoxia	A			Tampere Museum of Natural History	Haavilla karhunputken kukinnolta, pieni niitty urheilukentaen vieressae
TACFI	TACFI522-12	JP00547		BOLD:AAZ3934	JP00547	658[0n]	2		1					2005-07-17	Nilea rufiscutellaris	A			Tampere Museum of Natural History
TACFI	TACFI523-12	JP00548		BOLD:AAZ3934	JP00548	658[0n]	2		1					2007-07-21	Nilea rufiscutellaris	A			Tampere Museum of Natural History
TACFI	TACFI524-12	JP00549		BOLD:AAZ3934	JP00549	658[0n]	2		1					2007-07-21	Nilea rufiscutellaris	A			Tampere Museum of Natural History
TACFI	TACFI525-12	JP00550		BOLD:ACZ8982	JP00550	658[0n]	2		1					2008-07-27	Phryxe magnicornis	A			Tampere Museum of Natural History
TACFI	TACFI526-12	JP00551		BOLD:ACB0796	JP00551	658[0n]	2		1						Phryxe erythrostoma	A			Tampere Museum of Natural History
TACFI	TACFI527-12	JP00552			JP00552	0[n]	2		1					2009-07-26	Phryxe erythrostoma	A			Tampere Museum of Natural History
TACFI	TACFI528-12	JP00553			JP00553	0[n]	2		1					2006-06-11	Lydella grisescens	A			Tampere Museum of Natural History	Period: Jun-11-2006 - Jun- 23-2006
TACFI	TACFI529-12	JP00554		BOLD:AAP8653	JP00554	658[0n]	2		1					2004-07-07	Lydella ripae	A			Tampere Museum of Natural History
TACFI	TACFI530-12	JP00555			JP00555	411[0n]	2		1					2004-07-16	Lydella stabulans	A			Tampere Museum of Natural History	Period: Jul-16-2004 - Jul-18-2004
TACFI	TACFI531-12	JP00556		BOLD:AAP8652	JP00556	658[0n]	2		1					2005-07-02	Belida angelicae	A			Tampere Museum of Natural History
TACFI	TACFI532-12	JP00557			JP00557	433[1n]	2		1					2005-07-30	Lydella stabulans	A			Tampere Museum of Natural History
TACFI	TACFI533-12	JP00558			JP00558	0[n]	2		1					2005-07-15	Lydella stabulans	A			Tampere Museum of Natural History	Period: Jul-15-2005 - Jul-28-2005
TACFI	TACFI534-12	JP00559			JP00559	0[n]	2		1					2000-08-05	Platymya fimbriata	A			Tampere Museum of Natural History
TACFI	TACFI535-12	JP00560		BOLD:AAG2162	JP00560	604[0n]	2		1					2005-07-27	Platymya fimbriata	A			Tampere Museum of Natural History
TACFI	TACFI536-12	JP00561		BOLD:AAG2162	JP00561	658[0n]	2		1					2007-06-08	Platymya fimbriata	A			Tampere Museum of Natural History
TACFI	TACFI537-12	JP00562		BOLD:AAG2162	JP00562	658[0n]	2		1					2005-06-12	Platymya fimbriata	A			Tampere Museum of Natural History
TACFI	TACFI538-12	JP00563		BOLD:ACB0964	JP00563	658[0n]	2		1						Elodia ambulatoria	A			Tampere Museum of Natural History	Collection Date: e. l. 2001
TACFI	TACFI539-12	JP00564		BOLD:ACB0964	JP00564	658[0n]	2		1					2009-07-23	Elodia ambulatoria	A			Tampere Museum of Natural History	Period: Jul-23-2009 - Aug-09-2009
TACFI	TACFI540-12	JP00565		BOLD:ACB0966	JP00565	658[0n]	2		1					2009-05-02	Brachicheta strigata	A			Tampere Museum of Natural History
TACFI	TACFI541-12	JP00566		BOLD:AAC1602	JP00566	607[0n]	2		1					2004-06-04	Eumea linearicornis	A			Tampere Museum of Natural History
TACFI	TACFI542-12	JP00567		BOLD:AAC1602	JP00567	658[0n]	2		1					2004-08-19	Eumea mitis	A			Tampere Museum of Natural History
TACFI	TACFI543-12	JP00568		BOLD:AAG2162	JP00568	658[0n]	2		1					2005-08-14	Platymya fimbriata	A			Tampere Museum of Natural History
TACFI	TACFI544-12	JP00569		BOLD:ACC6145	JP00569	658[0n]	2		1					2008-05-29	Cyzenis jucunda	A			Tampere Museum of Natural History
TACFI	TACFI545-12	JP00570			JP00570	0[n]	2		1					2005-05-22	Cyzenis jucunda	A			Tampere Museum of Natural History	Period: May-22-2005 - Jun-19-2005: Malaise
TACFI	TACFI546-12	JP00571		BOLD:ACC6145	JP00571	658[0n]	2		1					2008-05-30	Cyzenis jucunda	A			Tampere Museum of Natural History	Period: May-30-2008 - Jun-19-2008
TACFI	TACFI547-12	JP00572		BOLD:ACB0930	JP00572	658[0n]	2		1					2006-05-07	Botria subalpina	A			Tampere Museum of Natural History	Label `4806`: RN 6657:1573
TACFI	TACFI548-12	JP00573		BOLD:ACB0930	JP00573	658[0n]	2		1					2008-05-01	Botria subalpina	A			Tampere Museum of Natural History
TACFI	TACFI549-12	JP00574		BOLD:ABW0151	JP00574	658[0n]	2		1					2005-07-27	Allophorocera ferruginea	A			Tampere Museum of Natural History
TACFI	TACFI550-12	JP00575		BOLD:ACB0995	JP00575	577[1n]	2		1					2003-08-21	Zenillia nr. dolosa	A			Tampere Museum of Natural History	Period: Aug-21-2003 - Aug-25-2003
TACFI	TACFI551-12	JP00576		BOLD:ABW4362	JP00576	658[0n]	2		1					2009-07-28	Frontina laeta	A			Tampere Museum of Natural History
TACFI	TACFI552-12	JP00577		BOLD:AAZ5252	JP00577	658[0n]	2		1					2006-06-11	Peleteria rubescens	A			Tampere Museum of Natural History	Period: Jun-11-2006 - Jun-23-2006
TACFI	TACFI553-12	JP00578		BOLD:ACD2663	JP00578	630[1n]	2	KU146917	1					2006-06-11	Peleteria varia	A			Tampere Museum of Natural History	Period: Jun-11-2006 - Jun-23-2006
TACFI	TACFI554-12	JP00579		BOLD:ACD2663	JP00579	597[1n]	2		1					2006-06-11	Peleteria varia	A			Tampere Museum of Natural History	Period: Jun-11-2006 - Jun-23-2006
TACFI	TACFI555-12	JP00580		BOLD:ACD2663	JP00580	630[0n]	2		1					2006-06-11	Peleteria varia	A			Tampere Museum of Natural History	Period: Jun-11-2006 - Jun-23-2006
TACFI	TACFI556-12	JP00581		BOLD:ABY5409	JP00581	658[0n]	2		1					2003-07-28	Nowickia marklini	A			Tampere Museum of Natural History
TACFI	TACFI557-12	JP00582		BOLD:ABY5409	JP00582	590[0n]	2		1					2005-07-19	Nowickia alpina	A			Tampere Museum of Natural History
TACFI	TACFI558-12	JP00583		BOLD:ABY5409	JP00583	658[0n]	2		1					2004-07-22	Nowickia alpina	A			Tampere Museum of Natural History
TACFI	TACFI559-12	JP00584		BOLD:AAN9512	JP00584	658[0n]	2		1					2005-07-30	Tachina nr. magnicornis	A			Tampere Museum of Natural History
TACFI	TACFI560-12	JP00585		BOLD:ABW2498	JP00585	658[0n]	2		1					2006-06-11	Tachina fera	A			Tampere Museum of Natural History	Period: Jun-11-2006 - Jun-23-2006
TACFI	TACFI561-12	JP00586		BOLD:AAN9512	JP00586	658[0n]	2		1					2006-07-13	Tachina nr. magnicornis	A			Tampere Museum of Natural History
TACFI	TACFI562-12	JP00587		BOLD:AAF6259	JP00587	658[0n]	2		1					2007-06-09	Lypha dubia	A			Tampere Museum of Natural History
TACFI	TACFI563-12	JP00588		BOLD:ABW4375	JP00588	658[0n]	2		1					2007-07-21	Eurithia anthophila	A			Tampere Museum of Natural History
TACFI	TACFI564-12	JP00589			JP00589	0[n]	2		1					2005-06-12	Panzeria rudis	A			Tampere Museum of Natural History
TACFI	TACFI565-12	JP00590			JP00590	0[n]	2		1					2005-05-22	Panzeria rudis	A			Tampere Museum of Natural History	Period: May-22-2005 - Jun-19-2005: Malaise
TACFI	TACFI566-12	JP00591			JP00591	0[n]	2		1					2003-07-22	Panzeria rudis	A			Tampere Museum of Natural History	Period: Jul-22-2003 - Aug-21-2003
TACFI	TACFI567-12	JP00592		BOLD:AAV9844	JP00592	658[0n]	2		1					2007-06-05	Appendicia truncata	A			Tampere Museum of Natural History
TACFI	TACFI568-12	JP00593		BOLD:AAG2113	JP00593	658[0n]	2		1					2005-06-12	Eurithia consobrina	A			Tampere Museum of Natural History
TACFI	TACFI569-12	JP00594		BOLD:ABY1135	JP00594	658[0n]	2		1					2006-07-15	Eurithia connivens	A			Tampere Museum of Natural History
TACFI	TACFI570-12	JP00595		BOLD:ABY1135	JP00595	615[0n]	2		1					2007-07-22	Eurithia connivens	A			Tampere Museum of Natural History
TACFI	TACFI571-12	JP00401			JP00401	0[n]			1					1995-08-06	Brullaea ocypteroidea	A			Tampere Museum of Natural History
TACFI	TACFI572-12	JP00402		BOLD:AAV0905	JP00402	658[0n]	2		1					2005-05-19	Strongygaster celer	A			Tampere Museum of Natural History
TACFI	TACFI573-12	JP00403		BOLD:ACF8196	JP00403	658[0n]	2		1					2004-05-31	Acemya acuticornis	A			Tampere Museum of Natural History
TACFI	TACFI574-12	JP00404		BOLD:ACB0777	JP00404	658[0n]	2		1					2012-06-10	Acemya rufitibia	A			Tampere Museum of Natural History	On label: 3474
TACFI	TACFI575-12	JP00405			JP00405	0[n]			1					1980-06-17	Carcelia tibialis	A			Tampere Museum of Natural History
TACFI	TACFI576-12	JP00406		BOLD:AAN9266	JP00406	651[0n]	2		1					2002-05-20	Clemelis pullata	A			Tampere Museum of Natural History
TACFI	TACFI577-12	JP00407			JP00407	0[n]	2		1					1997-08-23	Erynnia ocypterata	A			Tampere Museum of Natural History	Period: Aug-23-1997 - Sep-20-1997
TACFI	TACFI578-12	JP00408		BOLD:ACF6012	JP00408	658[0n]	2		1					1998-08-07	Gonia capitata	A			Tampere Museum of Natural History
TACFI	TACFI579-12	JP00409			JP00409	0[n]			1					1992-05-13	Hebia flavipes	A			Tampere Museum of Natural History
TACFI	TACFI580-12	JP00410		BOLD:AAN4016	JP00410	658[0n]	2		1					2009-07-16	Masicera silvatica	A			Tampere Museum of Natural History
TACFI	TACFI581-12	JP00411			JP00411	407[0n]	4		1					2000-06-08	Periarchiclops scutellaris	A			Tampere Museum of Natural History
TACFI	TACFI582-12	JP00412			JP00412	407[0n]	4		1					1997-07-07	Phryxe nemea	A			Tampere Museum of Natural History
TACFI	TACFI583-12	JP00413		BOLD:ACD9530	JP00413	658[0n]	2		1					2000-06-07	Pseudoperichaeta palesoidea	A			Tampere Museum of Natural History
TACFI	TACFI584-12	JP00414			JP00414	460[1n]	2		1					2002-05-21	Smidtia conspersa	A			Tampere Museum of Natural History
TACFI	TACFI585-12	JP00415			JP00415	0[n]			1					1992-06-03	Spallanzania hebes	A			Tampere Museum of Natural History
TACFI	TACFI586-12	JP00416		BOLD:AAZ8670	JP00416	658[0n]	2		1					2009-07-15	Sturmia bella	A			Tampere Museum of Natural History
TACFI	TACFI587-12	JP00417		BOLD:ACF7333	JP00417	658[0n]	2		1					1999-09-02	Thelymorpha marmorata	A			Tampere Museum of Natural History
TACFI	TACFI588-12	JP00418			JP00418	0[n]			1					1972-07-05	Actia infantula	A			Tampere Museum of Natural History
TACFI	TACFI589-12	JP00419			JP00419	0[n]			1					1967-06-06	Actia maksymovi	A			Tampere Museum of Natural History
TACFI	TACFI590-12	JP00420			JP00420	0[n]			1					1992-05-06	Entomophaga nigrohalterata	A			Tampere Museum of Natural History
TACFI	TACFI591-12	JP00421		BOLD:ACD9518	JP00421	658[0n]	2		1					2002-07-28	Eurithia caesia	A			Tampere Museum of Natural History
TACFI	TACFI592-12	JP00422		BOLD:AAG2113	JP00422	658[0n]	2		1					1999-08-31	Eurithia vivida	A			Tampere Museum of Natural History
TACFI	TACFI593-12	JP00423			JP00423	0[n]			1					1998-08-11	Linnaemya olsufjevi	A			Tampere Museum of Natural History
TACFI	TACFI594-12	JP00424			JP00424	0[n]	4		1					2000-08-20	Nemoraea pellucida	A			Tampere Museum of Natural History
TACFI	TACFI595-12	JP00425		BOLD:AAK1389	JP00425	658[0n]	2	KU146901	1					2008-08-26	Nowickia ferox	A			Tampere Museum of Natural History
TACFI	TACFI596-12	JP00426		BOLD:ACD9618	JP00426	658[0n]	2		1					1998-08-04	Dexia rustica	A			Tampere Museum of Natural History
TACFI	TACFI597-12	JP00427		BOLD:ACF7509	JP00427	658[0n]	2		1					1998-08-08	Eriothrix prolixa	A			Tampere Museum of Natural History
TACFI	TACFI598-12	JP00428		BOLD:AAN9583	JP00428	658[0n]	2		1					2009-07-12	Estheria petiolata	A			Tampere Museum of Natural History
TACFI	TACFI599-12	JP00429		BOLD:ACD9481	JP00429	658[0n]	2		1					2011-04-27	Periscepsia carbonaria	A			Tampere Museum of Natural History
TACFI	TACFI600-12	JP00430		BOLD:ACF9642	JP00430	658[0n]	2		1					2012-05-08	Clytiomya	A			Tampere Museum of Natural History
TACFI	TACFI601-12	JP00431		BOLD:AAG2311	JP00431	658[0n]	2		1					2012-05-10	Phasia obesa	A			Tampere Museum of Natural History
TACFI	TACFI602-12	JP00432		BOLD:AAG2311	JP00432	658[0n]	2		1					2012-05-05	Phasia obesa	A			Tampere Museum of Natural History
TACFI	TACFI603-12	JP00433		BOLD:AAN9761	JP00433	658[0n]	2		1					2012-05-18	Meigenia majuscula	A			Tampere Museum of Natural History
TACFI	TACFI604-12	JP00434		BOLD:ABW2498	JP00434	658[0n]	2		1					2012-05-17	Tachina nupta	A			Tampere Museum of Natural History
TACFI	TACFI605-12	JP00435		BOLD:ACF9017	JP00435	658[0n]	2		1					2012-05-04	Loewia adjuncta	A			Tampere Museum of Natural History
TACFI	TACFI606-12	JP00436		BOLD:ACF7922	JP00436	658[3n]	2		1					2012-08-03	Synactia parvula	A			Tampere Museum of Natural History
TACFI	TACFI607-12	JP00437		BOLD:ACF8476	JP00437	658[0n]	2		1					2012-08-03	Hemyda vittata	A			Tampere Museum of Natural History
TACFI	TACFI608-12	JP00438		BOLD:ACF7404	JP00438	658[0n]	2		1					2012-06-26	Hemyda obscuripennis	A			Tampere Museum of Natural History
TACFI	TACFI609-12	JP00439		BOLD:ACF7922	JP00439	658[0n]	2		1					2012-06-30	Synactia parvula	A			Tampere Museum of Natural History
TACFI	TACFI610-12	JP00440			JP00440	407[0n]	6		1					2012-08-03	Paracraspedothrix montivaga	A			Tampere Museum of Natural History
TACFI	TACFI611-12	JP00441		BOLD:AAX6668	JP00441	649[1n]	2		1					2012-08-03	Lophosia fasciata	A			Tampere Museum of Natural History
TACFI	TACFI612-12	JP00442		BOLD:ACO3996	JP00442	658[0n]	2		1					2012-08-04	Gymnosoma dolycoridis	A			Tampere Museum of Natural History
TACFI	TACFI613-12	JP00443		BOLD:ACO3996	JP00443	658[0n]	2		1					2012-08-03	Gymnosoma dolycoridis	A			Tampere Museum of Natural History
TACFI	TACFI614-12	JP00444		BOLD:AAN4077	JP00444	658[0n]	2		1					2012-08-03	Blondelia nigripes	A			Tampere Museum of Natural History	Blondelia sp.
TACFI	TACFI616-12	JP00446		BOLD:AAF6259	JP00446	658[0n]	2		1					2008-04-19	Lypha dubia	A			Tampere Museum of Natural History
TACFI	TACFI617-12	JP00447		BOLD:AAG6902	JP00447	658[0n]	2		1					2012-08-13	Medina luctuosa	A			Tampere Museum of Natural History	Period: Aug-13-2010 - Aug-19-2012
TACFI	TACFI618-12	JP00448		BOLD:AAG6902	JP00448	658[0n]	2		1					2007-08-15	Medina luctuosa	A			Tampere Museum of Natural History
TACFI	TACFI619-12	JP00449		BOLD:AAN4077	JP00449	658[0n]	2		1					2008-07-23	Blondelia nigripes	A			Tampere Museum of Natural History
TACFI	TACFI620-12	JP00450		BOLD:ACB0954	JP00450	658[0n]	2		1					2007-08-08	Epicampocera succincta	A			Tampere Museum of Natural History
TACFI	TACFI621-12	JP00451			JP00451	0[n]	2		1					2000-07-12	Actia pilipennis	A			Tampere Museum of Natural History	Period: Jul-12-2000 - Aug-07-2000
TACFI	TACFI622-12	JP00452		BOLD:ACD1290	JP00452	658[0n]	2		1					2012-08-13	Actia nigroscutellata	A			Tampere Museum of Natural History	Period: Aug-13-2010 - Aug-19-2012
TACFI	TACFI623-12	JP00453		BOLD:ABV4561	JP00453	658[0n]	2		1					2008-08-03	Actia lamia	A			Tampere Museum of Natural History
TACFI	TACFI624-12	JP00454		BOLD:ABZ2498	JP00454	658[0n]	2		1					2012-06-20	Blepharomyia angustifrons	A			Tampere Museum of Natural History	Period: Jun-20-2012 - Jun-24-2012
TACFI	TACFI625-12	JP00455		BOLD:ACF7878	JP00455	658[0n]	2		1					2012-08-28	Diplostichus janitrix	A			Tampere Museum of Natural History	Period: Aug-28-2012 - Sep-11-2012
TACFI	TACFI626-12	JP00456		BOLD:ACE5781	JP00456	658[0n]	2		1					2012-08-28	Aplomya confinis	A			Tampere Museum of Natural History	Period: Aug-28-2012 - Sep-11-2012
TACFI	TACFI627-12	JP00457		BOLD:ACB0998	JP00457	658[0n]	2		1					2012-08-13	Paratryphera barbatula	A			Tampere Museum of Natural History	Period: Aug-13-2010 - Aug-19-2012
TACFI	TACFI628-12	JP00458		BOLD:ACF7321	JP00458	658[0n]	2		1					2012-07-12	Phebellia pauciseta	A			Tampere Museum of Natural History	Period: Jul-12-2012 - Jul-15-2012
TACFI	TACFI629-12	JP00459		BOLD:ACF7321	JP00459	658[0n]	2		1					2012-07-08	Phebellia pauciseta	A			Tampere Museum of Natural History	Period: Jul-08-2012 - Jul-11-2012
TACFI	TACFI630-12	JP00460		BOLD:ACA9927	JP00460	658[0n]	2		1					2012-05-25	Athrycia trepida	A			Tampere Museum of Natural History	Period: May-25-2012 - May-28-2012
TACFI	TACFI631-12	JP00461		BOLD:ABW2498	JP00461	658[0n]	2		1					2012-07-12	Tachina fera	A			Tampere Museum of Natural History
TACFI	TACFI632-12	JP00462		BOLD:AAN9512	JP00462	658[0n]	2	KU146923	1					2012-08-03	Tachina nr. magnicornis	A			Tampere Museum of Natural History	Period: Aug-03-2012 - Aug-15-2012
TACFI	TACFI633-12	JP00463		BOLD:ABW4375	JP00463	658[0n]	2		1					2007-07-23	Eurithia anthophila	A			Tampere Museum of Natural History
TACFI	TACFI634-12	JP00464		BOLD:ABY1135	JP00464	658[0n]	2		1					2007-07-16	Eurithia connivens	A			Tampere Museum of Natural History
TACFI	TACFI635-12	JP00465		BOLD:ACB0817	JP00465	658[0n]	2		1					2012-05-17	Gonia divisa	A			Tampere Museum of Natural History
TACFI	TACFI636-12	JP00466		BOLD:ACB0817	JP00466	658[0n]	2		1					2012-05-25	Gonia divisa	A			Tampere Museum of Natural History	Period: May-25-2012 - May-28-2012
TACFI	TACFI637-12	JP00467		BOLD:AAY2346	JP00467	658[0n]	2		1					2012-05-27	Gonia ornata	A			Tampere Museum of Natural History	On label: L262-lhk7
TACFI	TACFI638-12	JP00468		BOLD:ACF9775	JP00468	658[0n]	2		1					2012-05-08	Gonia picea	A			Tampere Museum of Natural History
TACFI	TACFI639-12	JP00469		BOLD:ACB0050	JP00469	658[0n]	2	KU146916	1					2012-08-01	Linnaemya vulpina	A			Tampere Museum of Natural History
TACFI	TACFI640-12	JP00470		BOLD:AAV7115	JP00470	658[0n]	2		1					2012-07-27	Eriothrix rufomaculatus	A			Tampere Museum of Natural History	Period: Jul-27-2012 - Jul-31-2012
TACFI	TACFI641-12	JP00471		BOLD:ACF6211	JP00471	658[0n]	2								Istocheta longicornis	A			Staatliches Museum fur Naturkunde Stuttgart	Collection Date: 2009
TACFI	TACFI642-12	JP00472		BOLD:ACF0198	JP00472	658[0n]	2								Winthemia erythura	A			Staatliches Museum fur Naturkunde Stuttgart	Collection Date: 1980
TACFI	TACFI643-12	JP00473			JP00473	0[n]									Billaea fortis	A			Staatliches Museum fur Naturkunde Stuttgart	Collection Date: 1987
TACFI	TACFI644-12	JP00474			JP00474	0[n]									Policheta unicolor	A			Staatliches Museum fur Naturkunde Stuttgart	Collection Date: 1988
TACFI	TACFI645-12	JP00475			JP00475	0[n]									Macquartia viridana	A			Staatliches Museum fur Naturkunde Stuttgart	Collection Date: 2002
TACFI	TACFI646-12	JP00476			JP00476	0[n]									Peteina erinaceus	A			Staatliches Museum fur Naturkunde Stuttgart	Collection Date: 1992
TACFI	TACFI647-12	JP00477			JP00477	0[n]									Rondania dispar	A			Staatliches Museum fur Naturkunde Stuttgart	Collection Date: 1983
TACFI	TACFI648-12	JP00478			JP00478	0[n]	2								Dexia vacua	A			Staatliches Museum fur Naturkunde Stuttgart	Collection Date: 1983
TACFI	TACFI649-12	JP00479			JP00479	0[n]	4								Eurithia intermedia	A			Staatliches Museum fur Naturkunde Stuttgart	Collection Date: 1994
TACFI	TACFI650-12	JP00480			JP00480	0[n]									Peleteria ferina	A			Staatliches Museum fur Naturkunde Stuttgart	Collection Date: 1994
TACFI	TACFI651-12	JP00481			JP00481	0[n]									Myxexoristops bonsdorffi	A			Staatliches Museum fur Naturkunde Stuttgart	Collection Date: 1974
TACFI	TACFI652-12	JP00482			JP00482	0[n]									Macroprosopa atrata	A			Staatliches Museum fur Naturkunde Stuttgart	Collection Date: 2000
TACFI	TACFI653-12	JP00483			JP00483	0[n]	2								Linnaemya haemorrhoidalis	A			Staatliches Museum fur Naturkunde Stuttgart	Collection Date: 1995
TACFI	TACFI654-12	JP00484			JP00484	0[n]									Senometopia separata	A			Staatliches Museum fur Naturkunde Stuttgart	Collection Date: 1988
TACFI	TACFI655-12	JP00485		BOLD:ACF6864	JP00485	526[0n]	2								Admontia seria	A			Staatliches Museum fur Naturkunde Stuttgart	Collection Date: 2000
TACFI	TACFI656-12	JP00486		BOLD:ACO3993	JP00486	658[0n]	2								Stomina tachinoides	A			Staatliches Museum fur Naturkunde Stuttgart	Collection Date: 1998
TACFI	TACFI657-12	JP00487			JP00487	0[n]									Cleonice keteli	A			Staatliches Museum fur Naturkunde Stuttgart	Collection Date: 1987
TACFI	TACFI658-12	JP00488			JP00488	0[n]	2								Chaetovoria antennata	A			Staatliches Museum fur Naturkunde Stuttgart	Collection Date: 1997
TACFI	TACFI659-12	JP00489		BOLD:AAG2126	JP00489	658[0n]	2								Aphria longilingua	A			Staatliches Museum fur Naturkunde Stuttgart	Collection Date: 1999
TACFI	TACFI660-12	JP00490		BOLD:ACD9587	JP00490	632[0n]	2								Eriothrix argyreatus	A			Staatliches Museum fur Naturkunde Stuttgart	Collection Date: 1996
TACFI	TACFI661-12	JP00491			JP00491	0[n]	2								Linnaemya rossica	A			Staatliches Museum fur Naturkunde Stuttgart	Collection Date: 1995
TACFI	TACFI662-12	JP00492			JP00492	0[n]									Drino gilva	A			Staatliches Museum fur Naturkunde Stuttgart	Collection Date: 1992
TACFI	TACFI663-12	JP00493			JP00493	0[n]									Paratryphera bisetosa	A			Staatliches Museum fur Naturkunde Stuttgart	Collection Date: 1969
TACFI	TACFI664-12	JP00494		BOLD:ACF8673	JP00494	658[0n]	2								Senometopia intermedia	A			Staatliches Museum fur Naturkunde Stuttgart	Collection Date: 2006
TACFI	TACFI665-12	JP00495			JP00495	0[n]									Germaria ruficeps	A			Staatliches Museum fur Naturkunde Stuttgart	Collection Date: 2001
TACFI	FIDIP3606-12	ZMUO.003707		BOLD:ACE1120	ZMUO.003707	658[0n]	3	KU146905	1					2001-08-23	Onychogonia cervini	A			University of Oulu	larva 23.08.2001: Host: LEP Pararctia lapponica
TACFI	FIDIP3607-12	ZMUO.003708		BOLD:ACE1120	ZMUO.003708	634[0n]	3		1					2001-08-22	Onychogonia cervini	A			University of Oulu	larva 22.08.2001: LEP: Arctiidae Pararctia lapponica
TACFI	FIDIP3608-12	JKo12-00189		BOLD:ACO3991	JKo12-00189	638[0n]	3		1					2012-08-19	Phorinia aurifrons	A			Research Collection of J. Koistinen
TACFI	FIDIP3609-12	AHa12-001306		BOLD:ACF0198	AHa12-001306	632[0n]	3		1					2011-06-27	Winthemia erythura	A			University of Helsinki
TACFI	DIFIA377-12	KWi-312		BOLD:ACD3034	KWi-312	658[0n]	2		1					2004-06-02	Graphogaster nigrescens	A			Research Collection of Kaj Winqvist	Period: Jun-02-2004 - Jun-09-2004
TACFI	FIDIP3612-13	JKA12-1946	JKA12-1946	BOLD:ACJ1887	JKA12-1946	658[0n]	2		1					2010-07-17	Aphantorhaphopsis verralli	adult			Finnish Museum of Natural History, Zoological Museum	JKA12-1946, 17.-20.7.2010
TACFI	FIDIP3625-13	JKA12-1959	JKA12-1959	BOLD:ACD2706	JKA12-1959	658[0n]	2		1					2011-05-25	Hebia flavipes	adult	25.5-4.6.2011		Finnish Museum of Natural History, Zoological Museum	JKA12-1959
TACFI	FIDIP3626-13	JKA12-1960	JKA12-1960	BOLD:ACD2761	JKA12-1960	658[0n]	2		1					2006-06-30	Gonia ornata	adult			Finnish Museum of Natural History, Zoological Museum	JKA12-1960
TACFI	FIDIP3627-13	JKA12-1961	JKA12-1961	BOLD:AAV9145	JKA12-1961	658[0n]	2		1					2010-07-08	Demoticus plebejus	adult			Finnish Museum of Natural History, Zoological Museum	JKA12-1961
TACFI	FIDIP3629-13	JKA12-1963	JKA12-1963		JKA12-1963	0[n]	2		1					2011-09-07	Smidtia amoena	adult			Finnish Museum of Natural History, Zoological Museum	JKA12-1963, 7.-9.2011
TACFI	FIDIP3630-13	JKA12-1964	JKA12-1964	BOLD:ACB0787	JKA12-1964	658[0n]	2		1					2011-05-23	Smidtia amoena	adult			Finnish Museum of Natural History, Zoological Museum	JKA12-1964
TACFI	FIDIP3631-13	JKA12-1965	JKA12-1965	BOLD:ACB0930	JKA12-1965	658[0n]	2		1					2011-05-23	Botria subalpina	adult			Finnish Museum of Natural History, Zoological Museum	JKA12-1965
TACFI	FIDIP3632-13	JKA12-1966	JKA12-1966	BOLD:ACB0135	JKA12-1966	658[0n]	2		1					2011-04-27	Panzeria puparum	adult			Finnish Museum of Natural History, Zoological Museum	JKA12-1966
TACFI	FIDIP3634-13	JKA12-1968	JKA12-1968	BOLD:AAV0907	JKA12-1968	658[0n]	2		1					2011-05-15	Macquartia viridana	adult			Finnish Museum of Natural History, Zoological Museum	JKA12-1968
TACFI	FIDIP3635-13	JKA12-1969	JKA12-1969	BOLD:ACC6145	JKA12-1969	658[0n]	2		1					2011-04-25	Cyzenis jucunda	adult			Finnish Museum of Natural History, Zoological Museum	JKA12-1969
TACFI	FIDIP3637-13	JKA12-1971	JKA12-1971	BOLD:ACB0817	JKA12-1971	658[0n]	2		1					2009-04-30	Gonia picea	adult			Finnish Museum of Natural History, Zoological Museum	JKA12-1971, 30.4. - 2.5.2009
TACFI	FIDIP3638-13	JKA12-1972	JKA12-1972	BOLD:ACB0817	JKA12-1972	658[0n]	2		1					2011-05-31	Gonia divisa	adult			Finnish Museum of Natural History, Zoological Museum	JKA12-1972
TACFI	FIDIP3868-13	MZH_HP.1491	MZH_HP.1491		MZH_Diptera	0[n]			1					2011-06-07	Bactromyia aurulenta	adult	jka11-01831	Vouchered:Registered Collection	Finnish Museum of Natural History, Zoological Museum	http://id.luomus.fi/HP.1491
TACFI	FIDIP3894-13	MZH_HP.1517	MZH_HP.1517		MZH_Diptera	0[n]			1					2011-06-07	Gymnocheta viridis	adult	jka11-01710	Vouchered:Registered Collection	Finnish Museum of Natural History, Zoological Museum	http://id.luomus.fi/HP.1517
TACFI	FIDIP3984-13	MZH_HP.1998	MZH_HP.1998	BOLD:ABY5409	MZH_Diptera	658[0n]	2		1					2010-07-10	Nowickia marklini	adult		Vouchered:Registered Collection	Finnish Museum of Natural History, Zoological Museum	http://id.luomus.fi/HP.1998
TACFI	FIDIP3985-13	MZH_HP.1999	MZH_HP.1999	BOLD:ABY5409	MZH_Diptera	658[0n]	2		1					2010-07-10	Nowickia marklini	adult		Vouchered:Registered Collection	Finnish Museum of Natural History, Zoological Museum	http://id.luomus.fi/HP.1999
TACFI	FIDIP3989-13	MZH_HP.2003	MZH_HP.2003	BOLD:ABW0151	MZH_Diptera	658[0n]	2		1					2009-07-09	Allophorocera lapponica	adult		Vouchered:Registered Collection	Finnish Museum of Natural History, Zoological Museum	http://id.luomus.fi/HP.2003
TACFI	TACFI666-13	JP00801			JP00801	0[n]	3		1					2000-07-06	Dinera carinifrons	Adult			Tampere Museum of Natural History	46deg32`04N 010deg29`28E
TACFI	TACFI667-13	JP00802		BOLD:ACN1416	JP00802	658[0n]	5		1					2003-07-16	Dinera carinifrons	Adult			Tampere Museum of Natural History	46deg32`55.3N 010deg15`47.9E
TACFI	TACFI668-13	JP00803		BOLD:ACA3942	JP00803	658[0n]	3		1					2012-05-08	Macquartia tessellatum	Adult			Tampere Museum of Natural History	36.848582 27.091942
TACFI	TACFI669-13	JP00804		BOLD:AAX9602	JP00804	658[0n]	3		1					2010-07-31	Dinera nr. fuscata	Adult			Tampere Museum of Natural History	50deg20`6``N8``41`8``
TACFI	TACFI670-13	JP00805		BOLD:AAX9602	JP00805	658[0n]	3		1					2011-07-23	Dinera nr. fuscata	Adult			Tampere Museum of Natural History	50deg20`6``N8``41`8``
TACFI	TACFI671-13	JP00806		BOLD:AAV6797	JP00806	658[0n]	3		1					2011-07-23	Dinera ferina	Adult			Tampere Museum of Natural History	50deg20`6``N8``41`8``
TACFI	TACFI672-13	JP00807		BOLD:AAX9602	JP00807	658[0n]	3		1					2010-08-07	Dinera nr. fuscata	Adult			Tampere Museum of Natural History	50deg20`6``N8deg41`8``
TACFI	TACFI673-13	JP00808		BOLD:AAX9602	JP00808	658[0n]	3		1					2012-06-23	Dinera nr. fuscata	Adult			Tampere Museum of Natural History	50deg20`6``N 8deg41`8``
TACFI	TACFI674-13	JP00809		BOLD:ACG6905	JP00809	658[0n]	3		1					2007-07-16	Phebellia glauca	Adult			Tampere Museum of Natural History
TACFI	TACFI675-13	JP00810		BOLD:ACD9613	JP00810	658[0n]	3		1					2010-07-09	Oswaldia reducta	Adult			Tampere Museum of Natural History
TACFI	TACFI676-13	JP00811		BOLD:ACD3910	JP00811	658[0n]	3		1					2009-07-23	Anthomyiopsis nigrisquamata	Adult			Tampere Museum of Natural History
TACFI	TACFI677-13	JP00812			JP00812	0[n]	3		1					1994-04-20	Carcelia iliaca	Adult			Tampere Museum of Natural History	period 20.-21.4.94, host: Thaumetopoea processionea
TACFI	TACFI678-13	JP00813		BOLD:AAZ4745	JP00813	658[0n]	3		1					2007-07-29	Erynnia ocypterata	Adult			Tampere Museum of Natural History
TACFI	TACFI679-13	JP00814		BOLD:AAZ4745	JP00814	658[0n]	3		1					2007-07-29	Erynnia ocypterata	Adult			Tampere Museum of Natural History
TACFI	TACFI680-13	JP00815		BOLD:AAZ4745	JP00815	658[0n]	3		1					2005-07-05	Erynnia ocypterata	Adult			Tampere Museum of Natural History
TACFI	TACFI681-13	JP00816			JP00816	0[n]	3		1					2006-08-05	Paracraspedothrix montivaga	Adult			Tampere Museum of Natural History
TACFI	TACFI682-13	JP00817		BOLD:ACB0816	JP00817	658[0n]	3		1					2008-06-13	Carcelia laxifrons	Adult			Tampere Museum of Natural History
TACFI	TACFI683-13	JP00818		BOLD:ACB0942	JP00818	658[0n]	3		1					2009-07-19	Carcelia atricosta	Adult			Tampere Museum of Natural History
TACFI	TACFI684-13	JP00819		BOLD:AAZ5252	JP00819	658[0n]	3	KU146925	1						Peleteria aenea	Adult			Tampere Museum of Natural History	UTM 8264293:0512680, 24 m a.s.l.: period 30.7-9.8.2011
TACFI	TACFI685-13	JP00820		BOLD:ACA9972	JP00820	658[0n]	3		1					2009-07-31	Pseudopachystylum gonioides	Adult			Tampere Museum of Natural History
TACFI	TACFI686-13	JP00821		BOLD:ACA9972	JP00821	658[0n]	3		1					2009-07-23	Pseudopachystylum gonioides	Adult			Tampere Museum of Natural History
TACFI	TACFI687-13	JP00822		BOLD:ACM2607	JP00822	658[0n]	3		1					2009-08-02	Pseudopachystylum gonioides	Adult			Tampere Museum of Natural History
TACFI	TACFI688-13	JP00823		BOLD:ACL8097	JP00823	658[0n]	3		1					2006-08-06	Oswaldia spectabilis	Adult			Tampere Museum of Natural History
TACFI	TACFI689-13	JP00824		BOLD:ACL8097	JP00824	645[0n]	3		1					2007-07-15	Oswaldia spectabilis	Adult			Tampere Museum of Natural History
TACFI	TACFI690-13	JP00825			JP00825	0[n]	3		1					2004-07-29	Oswaldia spectabilis	Adult			Tampere Museum of Natural History
TACFI	TACFI691-13	JP00826		BOLD:ACL8097	JP00826	614[0n]	3		1					2005-08-03	Oswaldia spectabilis	Adult			Tampere Museum of Natural History
TACFI	TACFI692-13	JP00827			JP00827	0[n]	3		1					2008-07-29	Oswaldia spectabilis	Adult			Tampere Museum of Natural History
TACFI	TACFI693-13	JP00828		BOLD:ACD3758	JP00828	658[0n]	3		1					2010-06-06	Siphona pauciseta	Adult			Tampere Museum of Natural History
TACFI	TACFI694-13	JP00829		BOLD:ACD3758	JP00829	630[0n]	3		1					2010-06-06	Siphona pauciseta	Adult			Tampere Museum of Natural History
TACFI	TACFI695-13	JP00830		BOLD:ACD3758	JP00830	658[0n]	3		1					2010-06-06	Siphona pauciseta	Adult			Tampere Museum of Natural History
TACFI	TACFI696-13	JP00831		BOLD:ACD9475	JP00831	658[0n]	3		1					2011-08-02	Germaria angustata	Adult			Tampere Museum of Natural History	vc27
TACFI	TACFI697-13	JP00832		BOLD:ACB1016	JP00832	658[0n]	3		1					2008-07-09	Onychogonia flaviceps	Adult			Tampere Museum of Natural History
TACFI	TACFI698-13	JP00833		BOLD:ACH2127	JP00833	658[0n]	3		1					2012-07-01	Actia infantula	Adult			Tampere Museum of Natural History
TACFI	TACFI699-13	JP00834		BOLD:ACH2127	JP00834	658[0n]	3		1					2012-08-28	Actia infantula	Adult			Tampere Museum of Natural History	TM444661 #86
TACFI	TACFI700-13	JP00835		BOLD:ACH2127	JP00835	658[0n]	3		1					2012-08-28	Actia infantula	Adult			Tampere Museum of Natural History	TM444661 #85
TACFI	TACFI702-13	JP00837		BOLD:ACA9902	JP00837	658[0n]	3	KU146921	1					2010-08-23	Lypha ruficauda	Adult			Tampere Museum of Natural History
TACFI	TACFI703-13	JP00838		BOLD:ACB0824	JP00838	658[0n]	3		1					2011-06-21	Nilea innoxia	Adult			Tampere Museum of Natural History
TACFI	TACFI704-13	JP00839		BOLD:ACL8046	JP00839	658[0n]	3		1					2012-07-17	Carcelia bombylans	Adult			Tampere Museum of Natural History
TACFI	TACFI705-13	JP00840		BOLD:ACG2953	JP00840	658[0n]	3		1					2012-05-25	Carcelia puberula	Adult			Tampere Museum of Natural History
TACFI	TACFI706-13	JP00841		BOLD:ACF0198	JP00841	658[0n]	3		1					2012-08-18	Winthemia erythura	Adult			Tampere Museum of Natural History
TACFI	TACFI707-13	JP00842		BOLD:ACO3977	JP00842	658[0n]	3		1					2012-07-02	Panzeria rudis	Adult			Tampere Museum of Natural History
TACFI	TACFI708-13	JP00843		BOLD:ACL8510	JP00843	658[0n]	3		1					2009-07-15	Paratryphera bisetosa	Adult			Tampere Museum of Natural History
TACFI	TACFI709-13	JP00844		BOLD:AAZ4745	JP00844	658[0n]	3		1					2012-06-04	Erynnia ocypterata	Adult			Tampere Museum of Natural History
TACFI	TACFI710-13	JP00845		BOLD:AAG6902	JP00845	658[0n]	3		1					2012-08-18	Medina luctuosa	Adult			Tampere Museum of Natural History
TACFI	TACFI711-13	JP00846		BOLD:ACA9946	JP00846	658[0n]	3		1					2012-06-30	Macquartia nudigena	Adult			Tampere Museum of Natural History
TACFI	TACFI712-13	JP00847			JP00847	0[n]	3		1					2012-08-06	Paracraspedothrix montivaga	Adult			Tampere Museum of Natural History
TACFI	TACFI713-13	JP00848		BOLD:AAN4077	JP00848	658[0n]	3		1					2011-07-26	Blondelia nigripes	Adult			Tampere Museum of Natural History
TACFI	TACFI714-13	JP00849		BOLD:ACF5729	JP00849	658[0n]	3		1					2009-06-11	Exorista fasciata	Adult			Tampere Museum of Natural History	43deg19`N 20deg46`E
TACFI	TACFI715-13	JP00850		BOLD:AAW3725	JP00850	658[0n]	3		1					2009-05-05	Chetogena cf. tschorsnigi	Adult			Tampere Museum of Natural History	40deg19`1.96N 7deg34`40.03``W
TACFI	TACFI716-13	JP00851			JP00851	0[n]	3		1						Chetogena acuminata	Adult			Tampere Museum of Natural History	light trap, period 4.7-12.8.2006
TACFI	TACFI717-13	JP00852		BOLD:ACL8571	JP00852	658[0n]	3		1					2013-07-16	Chetogena acuminata	Adult			Tampere Museum of Natural History
TACFI	TACFI718-13	JP00853		BOLD:ACL8661	JP00853	658[0n]	3		1					2007-09-10	Vibrissina turrita	Adult			Tampere Museum of Natural History
TACFI	TACFI719-13	JP00854		BOLD:ACD2778	JP00854	658[0n]	3		1					2012-05-18	Carcelia tibialis	Adult			Tampere Museum of Natural History	50.494 N 5.550 E
TACFI	TACFI720-13	JP00855			JP00855	0[n]	3		1					2004-06-01	Carcelia puberula	Adult			Tampere Museum of Natural History
TACFI	TACFI721-13	JP00856		BOLD:ACL8083	JP00856	658[0n]	3		1					2003-08-22	Thecocarcelia acutangulata	Adult			Tampere Museum of Natural History
TACFI	TACFI722-13	JP00857		BOLD:ACL7923	JP00857	658[0n]	3		1					2010-06-09	Erycia	Adult			Tampere Museum of Natural History	42deg16`15N 27deg42`2`` E
TACFI	TACFI723-13	JP00858		BOLD:ACO3994	JP00858	658[0n]	3		1						Panzeria laevigata	Adult			Tampere Museum of Natural History	malaise trap, period 18.-25.4.2008
TACFI	TACFI724-13	JP00859		BOLD:ACF4476	JP00859	658[0n]	3	KU146915	1					2011-07-07	Linnaemya haemorrhoidalis	Adult			Tampere Museum of Natural History	40deg54`N 44deg43`E
TACFI	TACFI725-13	JP00860		BOLD:ACH2127	JP00860	658[0n]	3		1					2001-06-22	Actia infantula	Adult			Tampere Museum of Natural History	on Chaerophyllum
TACFI	TACFI726-13	JP00861		BOLD:ACH1961	JP00861	658[0n]	3		1						Peribaea setinervis	Adult			Tampere Museum of Natural History	52deg07`49.3``N 5deg15`57.8``E, malaise trap, period 5.-9.7.2010
TACFI	TACFI727-13	JP00862		BOLD:ACO3993	JP00862	658[0n]	3		1					2001-08-26	Stomina tachinoides	Adult			Tampere Museum of Natural History
TACFI	TACFI728-13	JP00863		BOLD:ACL8113	JP00863	658[0n]	3		1					2013-04-11	Baumhaueria goniaeformis	Adult			Tampere Museum of Natural History	46deg14`40.56``N 20deg12`11.28``E
TACFI	TACFI729-13	JP00864		BOLD:ACH2086	JP00864	658[0n]	3		1					2012-06-11	Phytomyptera nigrina	Adult			Tampere Museum of Natural History
TACFI	TACFI730-13	JP00865		BOLD:AAN9651	JP00865	658[0n]	3		1					2012-06-29	Cadurciella tritaeniata	Adult			Tampere Museum of Natural History
TACFI	TACFI731-13	JP00866		BOLD:AAN9651	JP00866	658[0n]	3		1					2012-06-29	Cadurciella tritaeniata	Adult			Tampere Museum of Natural History
TACFI	TACFI732-13	JP00867		BOLD:AAZ4745	JP00867	658[0n]	3		1					2012-06-29	Erynnia ocypterata	Adult			Tampere Museum of Natural History
TACFI	TACFI733-13	JP00868		BOLD:AAG2113	JP00868	658[0n]	3		1					2012-06-19	Eurithia vivida	Adult			Tampere Museum of Natural History
TACFI	TACFI734-13	JP00869		BOLD:ACD9460	JP00869	658[0n]	3		1					2012-06-06	Periarchiclops scutellaris	Adult			Tampere Museum of Natural History
TACFI	TACFI735-13	JP00870		BOLD:ABZ7811	JP00870	658[0n]	3		1					2012-07-03	Winthemia quadripustulata	Adult			Tampere Museum of Natural History
TACFI	TACFI736-13	JP00871		BOLD:ACB0134	JP00871	658[0n]	3		1					2012-07-03	Peribaea hertingi	Adult			Tampere Museum of Natural History
TACFI	TACFI737-13	JP00872		BOLD:ACF6211	JP00872	655[0n]	3		1					2012-06-30	Istocheta longicornis	Adult			Tampere Museum of Natural History	N 55.48.32 E 14.04.19 Aengsmark/bete
TACFI	TACFI738-13	JP00873		BOLD:ACD3587	JP00873	658[0n]	3		1					2012-06-19	Blepharomyia piliceps	Adult			Tampere Museum of Natural History
TACFI	TACFI739-13	JP00874		BOLD:AAG6902	JP00874	658[0n]	3		1					2012-06-19	Medina luctuosa	Adult			Tampere Museum of Natural History
TACFI	TACFI740-13	JP00875		BOLD:AAV8857	JP00875	658[0n]	3		1					2012-07-04	Staurochaeta albocingulata	Adult			Tampere Museum of Natural History
TACFI	TACFI741-13	JP00876		BOLD:ACB0787	JP00876	614[0n]	3		1					2011-06-27	Smidtia amoena	Adult			Tampere Museum of Natural History
TACFI	TACFI742-13	JP00877		BOLD:ACO3989	JP00877	658[0n]	3		1						Nemorilla maculosa	Adult			Tampere Museum of Natural History	year 2011, host possibly Diloba caeruleocephala
TACFI	TACFI743-13	JP00878			JP00878	0[n]	3		1					2011-08-15	Phryxe heraclei	Adult			Tampere Museum of Natural History	50deg20`11``N 8deg42`56``
TACFI	TACFI744-13	JP00879		BOLD:ACM3624	JP00879	659[0n]	3		1					2010-08-07	Phryxe heraclei	Adult			Tampere Museum of Natural History	50deg20`6``N 8deg41`8``
TACFI	TACFI745-13	JP00880		BOLD:ACB0796	JP00880	552[0n]	3		1					2007-07-16	Phryxe erythrostoma	Adult			Tampere Museum of Natural History
TACFI	TACFI746-13	JP00881		BOLD:ACZ8981	JP00881	658[0n]	3		1					2008-08-03	Phryxe vulgaris	Adult			Tampere Museum of Natural History
TACFI	TACFI747-13	JP00882		BOLD:AAP8653	JP00882	658[1n]	3		1					2012-06-18	Lydella ripae	Adult			Tampere Museum of Natural History
TACFI	TACFI748-13	JP00883		BOLD:AAG6902	JP00883	658[0n]	3		1					2012-06-29	Medina luctuosa	Adult			Tampere Museum of Natural History
TACFI	TACFI749-13	JP00884		BOLD:AAG6902	JP00884	658[0n]	3		1					2012-06-19	Medina luctuosa	Adult			Tampere Museum of Natural History
TACFI	TACFI750-13	JP00885		BOLD:ACB0817	JP00885	658[0n]	3		1					2013-04-22	Gonia divisa	Adult			Tampere Museum of Natural History
TACFI	TACFI751-13	JP00886		BOLD:ACC6145	JP00886	658[0n]	3		1					2013-04-29	Cyzenis jucunda	Adult			Tampere Museum of Natural History
TACFI	TACFI752-13	JP00887		BOLD:ACB0896	JP00887	658[0n]	3		1					2013-04-29	Cyzenis albicans	Adult			Tampere Museum of Natural History
TACFI	TACFI753-13	JP00888		BOLD:ACB3639	JP00888	658[0n]	3		1					2012-06-05	Ceromya bicolor	Adult			Tampere Museum of Natural History
TACFI	TACFI754-13	JP00889		BOLD:ACD9465	JP00889	658[0n]	3		1					2012-05-17	Phryno vetula	Adult			Tampere Museum of Natural History	50deg20`6``N 8deg41`8``
TACFI	TACFI755-13	JP00890		BOLD:AAN3557	JP00890	574[3n]	3		1					2011-09-10	Linnaemya picta	Adult			Tampere Museum of Natural History	50deg20`11N 8deg42`56``
TACFI	TACFI756-13	JP00891		BOLD:AAZ3879	JP00891	658[0n]	3		1					2012-08-04	Linnaemya tessellans	Adult			Tampere Museum of Natural History	50deg20`11``N 8deg42`56``
TACFI	TACFI757-13	JP00892		BOLD:ABW2498	JP00892	658[0n]	3		1					2012-05-18	Tachina nupta	Adult			Tampere Museum of Natural History	50deg20`6``N 8deg41`8``
TACFI	TACFI758-13	JP00893		BOLD:ACB0954	JP00893	658[0n]	3		1					2012-05-28	Epicampocera succincta	Adult			Tampere Museum of Natural History	50deg47`18``N 6deg4`45
TACFI	TACFI759-13	JP00894		BOLD:ACD3587	JP00894	658[0n]	3		1					2012-06-13	Blepharomyia piliceps	Adult			Tampere Museum of Natural History
TACFI	TACFI760-13	JP00895		BOLD:AAV9222	JP00895	658[0n]	3		1					2010-07-31	Cistogaster globosa	Adult			Tampere Museum of Natural History	50deg20`6``N 8deg41`8``
TACFI	FIDIP4120-14	MZH_HP.684	MZH_HP.684	BOLD:ACM2607	MZH_HP.684	658[0n]	2		1					2011-06-11	Pseudopachystylum gonioides	adult	jka11-00005	Vouchered:Registered Collection	Finnish Museum of Natural History, Zoological Museum	http://id.luomus.fi/HP.684
TACFI	TACFI761-14	JP00096		BOLD:AAP8655	JP00096	658[0n]	2	KU146920	1						Linnaemya bergstroemi	adult			Tampere Museum of Natural History	ex larva 2001 from Pararctia lapponica (Erebidae: Arctiinae)
TACFI	TACFI762-14	JP00097		BOLD:ACL6462	JP00097	658[0n]	2		1					2013-07-15	Phytomyptera nigroaenea	adult			Tampere Museum of Natural History	Phytomyptera nigroaenea
TACFI	TACFI763-14	JP00098	JP00098	BOLD:ACI8929	JP00098	658[0n]	2		1					2006-09-08	Carcelia gnava				Tampere Museum of Natural History
TACFI	TACFI764-14	JP00099	JP00099	BOLD:AAG2429	JP00099	658[0n]			1					2013-07-25	Carcelia lucorum				Tampere Museum of Natural History
TACFI	FIDIP4234-14	MZH_HP.2151	MZH_HP.2151	BOLD:AAG6902	MZH_Diptera	658[0n]	2		1					2012-08-03	Medina luctuosa	adult	AHa12-001897		Finnish Museum of Natural History, Zoological Museum	http://id.luomus.fi/HP.2151
TACFI	FIDIP4235-14	MZH_HP.2152	MZH_HP.2152	BOLD:AAV0942	MZH_Diptera	658[0n]	2		1					2003-08-09	Myxexoristops bonsdorffi	adult	AHa12-000001		Finnish Museum of Natural History, Zoological Museum	http://id.luomus.fi/HP.2152
TACFI	FIDIP4236-14	MZH_HP.2153	MZH_HP.2153	BOLD:ACD9613	MZH_Diptera	658[3n]	2		1					2000-08-13	Oswaldia reducta	adult	AHa12-005250		Finnish Museum of Natural History, Zoological Museum	http://id.luomus.fi/HP.2153
TACFI	FIDIP4299-14	MZH_HP.2216	MZH_HP.2216	BOLD:ACC6145	MZH_Diptera	658[0n]	2		2					2012-04-29	Cyzenis jucunda	adult	AHa12-000917		Finnish Museum of Natural History, Zoological Museum	http://id.luomus.fi/HP.2216
TACFI	FIDIP4344-14	MZH_HP.2261	MZH_HP.2261	BOLD:AAY0450	MZH_Diptera	658[0n]	2		2					2011-06-18	Periscepsia ringdahli	adult			Finnish Museum of Natural History, Zoological Museum	http://id.luomus.fi/HP.2261
TACFI	FIDIP4362-14	MZH_HP.2279	MZH_HP.2279	BOLD:AAN9583	MZH_Diptera	658[0n]	2		2					2011-07-07	Estheria petiolata	adult			Finnish Museum of Natural History, Zoological Museum	http://id.luomus.fi/HP.2279
TACFI	FIDIP4363-14	MZH_HP.2280	MZH_HP.2280	BOLD:ACN3499	MZH_Diptera	624[1n]	2		2					2011-06-19	Oswaldia eggeri	adult			Finnish Museum of Natural History, Zoological Museum	http://id.luomus.fi/HP.2280
TACFI	FIDIP4364-14	MZH_HP.2281	MZH_HP.2281	BOLD:ACN4397	MZH_Diptera	658[0n]	2		2					2011-06-11	Klugia marginata	adult			Finnish Museum of Natural History, Zoological Museum	http://id.luomus.fi/HP.2281
TACFI	FIDIP4365-14	MZH_HP.2282	MZH_HP.2282	BOLD:ACO3977	MZH_Diptera	658[0n]	2		2					2011-06-04	Panzeria vagans	adult			Finnish Museum of Natural History, Zoological Museum	http://id.luomus.fi/HP.2282
TACFI	FIDIP4366-14	MZH_HP.2283	MZH_HP.2283	BOLD:AAG2113	MZH_Diptera	658[0n]	2		2					2011-06-15	Eurithia vivida	adult			Finnish Museum of Natural History, Zoological Museum	http://id.luomus.fi/HP.2283
TACFI	FIDIP4367-14	MZH_HP.2284	MZH_HP.2284	BOLD:ACD2803	MZH_Diptera	658[0n]	2		2					1905-06-29	Winthemia cruentata	adult	AHa07-001053		Finnish Museum of Natural History, Zoological Museum	http://id.luomus.fi/HP.2284
TACFI	FIDIP4368-14	MZH_HP.2285	MZH_HP.2285	BOLD:ACD2803	MZH_Diptera	658[0n]	2		2					1905-06-29	Winthemia cruentata	adult	AHa07-001059		Finnish Museum of Natural History, Zoological Museum	http://id.luomus.fi/HP.2285
TACFI	TACFI765-14	JP00196	JP00196	BOLD:ACM7749	JP00196	658[1n]	2		1					2006-08-08	Siphona cristata			To be Vouchered:Holdup/Private	Tampere Museum of Natural History
TACFI	TACFI766-14	JP00197	JKA13-4829	BOLD:ACG2953	JKA13-4829	658[0n]	2							2013-05-31	Carcelia puberula	adult			Museum Zoological Helsinki
TACFI	TACFI767-14	JP00198	JP00198	BOLD:ACN4397	JP00198	658[1n]	2		1					2014-06-04	Klugia marginata				Tampere Museum of Natural History
TACFI	LEFIJ2283-14	JP00927		BOLD:AAG2173	JP00927	658[0n]	4		1					2013-07-27	Ceromasia rubrifrons	Adult			Tampere Museum of Natural History
TACFI	LEFIJ2284-14	JP00901		BOLD:AAN9583	JP00901	658[0n]	4		1					2013-06-26	Estheria petiolata	Adult			Tampere Museum of Natural History
TACFI	LEFIJ2285-14	JP00902		BOLD:AAN9583	JP00902	658[0n]	4		1					2013-06-26	Estheria petiolata	Adult			Tampere Museum of Natural History
TACFI	LEFIJ2286-14	JP00903		BOLD:AAG2163	JP00903	658[0n]	4		1					2013-06-27	Exorista	Adult			Tampere Museum of Natural History
TACFI	LEFIJ2287-14	JP00904		BOLD:AAZ4745	JP00904	658[0n]	4		1					2013-06-26	Erynnia ocypterata	Adult			Tampere Museum of Natural History
TACFI	LEFIJ2288-14	JP00905		BOLD:AAZ4745	JP00905	658[0n]	4		1					2013-06-26	Erynnia ocypterata	Adult			Tampere Museum of Natural History
TACFI	LEFIJ2289-14	JP00906		BOLD:AAZ4745	JP00906	658[0n]	4		1					2013-06-26	Erynnia ocypterata	Adult			Tampere Museum of Natural History
TACFI	LEFIJ2290-14	JP00907		BOLD:ACL8046	JP00907	658[0n]	4		1					2013-06-16	Carcelia bombylans	Adult			Tampere Museum of Natural History
TACFI	LEFIJ2291-14	JP00908		BOLD:ACN3499	JP00908	658[0n]	4		1					2013-06-30	Oswaldia eggeri	Adult			Tampere Museum of Natural History
TACFI	LEFIJ2292-14	JP00909		BOLD:ACB0772	JP00909	658[0n]	4		1					2013-07-09	Erycia furibunda	Adult			Tampere Museum of Natural History
TACFI	LEFIJ2293-14	JP00910		BOLD:AAI1339	JP00910	658[0n]	4		1					2013-07-24	Linnaemya rossica	Adult			Tampere Museum of Natural History
TACFI	LEFIJ2294-14	JP00911		BOLD:AAI1339	JP00911	658[0n]	4	KU146913	1					2013-07-24	Linnaemya rossica	Adult			Tampere Museum of Natural History
TACFI	LEFIJ2295-14	JP00912		BOLD:ACB0817	JP00912	658[0n]	4		1					2013-05-15	Gonia picea	Adult			Tampere Museum of Natural History
TACFI	LEFIJ2296-14	JP00913		BOLD:ACF9775	JP00913	658[0n]	4		1					2013-04-01	Gonia picea	Adult			Tampere Museum of Natural History
TACFI	LEFIJ2297-14	JP00914		BOLD:ACF9775	JP00914	658[0n]	4		1					2013-05-06	Gonia picea	Adult			Tampere Museum of Natural History
TACFI	LEFIJ2298-14	JP00915		BOLD:AAG2113	JP00915	658[0n]	4		1					2013-06-20	Eurithia vivida	Adult			Tampere Museum of Natural History
TACFI	LEFIJ2299-14	JP00916		BOLD:ACD1435	JP00916	658[0n]	4		1					2013-07-08	Thelaira nigrina	Adult			Tampere Museum of Natural History
TACFI	LEFIJ2300-14	JP00917		BOLD:ABY5409	JP00917	658[0n]	4		1					2013-07-01	Nowickia marklini	Adult			Tampere Museum of Natural History
TACFI	LEFIJ2301-14	JP00918		BOLD:ACF5729	JP00918	658[0n]	4		1					2013-07-01	Exorista larvarum	Adult			Tampere Museum of Natural History
TACFI	LEFIJ2304-14	JP00921		BOLD:ACB0772	JP00921	658[0n]	4		1					2013-06-22	Erycia furibunda	Adult			Tampere Museum of Natural History
TACFI	LEFIJ2305-14	JP00922		BOLD:ACO4699	JP00922	658[0n]	4		1					2013-07-27	Phebellia villica	Adult			Tampere Museum of Natural History
TACFI	LEFIJ2306-14	JP00923		BOLD:ACD2778	JP00923	658[0n]	4		1					2013-06-24	Carcelia tibialis	Adult			Tampere Museum of Natural History
TACFI	LEFIJ2307-14	JP00924		BOLD:AAG2162	JP00924	658[0n]	4		1						Platymya fimbriata	Adult			Tampere Museum of Natural History	year 2013
TACFI	LEFIJ2308-14	JP00925		BOLD:ACZ8981	JP00925	658[0n]	4		1						Phryxe vulgaris	Adult			Tampere Museum of Natural History	year 2013
TACFI	LEFIJ2309-14	JP00926		BOLD:AAV8857	JP00926	658[0n]	4		1					2013-07-09	Staurochaeta albocingulata	Adult			Tampere Museum of Natural History
TACFI	TACFI768-14	ThZ00001	ThZ00001	BOLD:ACO2118	ThZ00001	686[0n]	2		1						Germariochaeta clavata				Tampere Museum of Natural History
TACFI	LEFIJ2451-14	ZMUO.012846		BOLD:ACA9902	ZMUO.012846	658[0n]	2		1					2014-05-14	Lypha ruficauda	adult			University of Oulu
TACFI	TACFI769-14	JP00100	JP00100	BOLD:ACR6683	JP00100	658[1n]	2		1					2014-07-13	Graphogaster dispar				Tampere Museum of Natural History
TACFI	TACFI770-14	JP00199	JP00199	BOLD:AAY0455	JP00199	657[1n]	2							2013-07-30	Periscepsia prunaria				Tampere Museum of Natural History
TACFI	TACFI771-14	JP00200	JP00200		JP00200	0[n]								2014-06-15	Rondania fasciata				Tampere Museum of Natural History
TACFI	TACFI772-14	AHa14-003401	AHa14-003401	BOLD:ACR0442	AHa14-003401	638[2n]	2		1					2014-08-06	Lecanipa bicincta				Tampere Museum of Natural History
TACFI	TACFI773-14	JP00296	JP00296	BOLD:AAG2163	JP00296	658[1n]	2		1					2013-07-11	Exorista mimula				Tampere Museum of Natural History
TACFI	TACFI774-15	JP00928	JP00928	BOLD:ACS7987	JP00928	611[0n]	2		1					2000-08-23	Chaetovoria antennata				Tampere Museum of Natural History
TACFI	LEFIJ4200-16	JP00929		BOLD:AAV8821	JP00929	632[0n]	2		1					2015-07-16	Solieria inanis	Adult			Tampere Museum of Natural History
TACFI	LEFIJ4201-16	JP00930		BOLD:AAV8821	JP00930	658[0n]	2		1					2015-07-21	Solieria inanis	Adult			Tampere Museum of Natural History
TACFI	LEFIJ4202-16	JP00931		BOLD:ACZ8981	JP00931	658[0n]	2		1					2015-08-03	Phryxe vulgaris	Adult			Tampere Museum of Natural History
TACFI	LEFIJ4203-16	JP00932			JP00932	0[n]	2		1					2011-08-15	Phryxe heraclei	Adult			Tampere Museum of Natural History
TACFI	LEFIJ4204-16	JP00933		BOLD:ACZ7775	JP00933	658[0n]	2		1					2015-06-29	Admontia maculisquama	Adult			Tampere Museum of Natural History
TACFI	LEFIJ4205-16	JP00934		BOLD:ACO3991	JP00934	658[0n]	2		1					2015-07-02	Phorinia aurifrons	Adult			Tampere Museum of Natural History
TACFI	LEFIJ4206-16	JP00935		BOLD:AAY0209	JP00935	630[0n]	2		1					2015-07-20	Loewia erecta	Adult			Tampere Museum of Natural History
TACFI	LEFIJ4207-16	JP00936		BOLD:ACZ9930	JP00936	658[0n]	2		1					2013-07-09	Billaea fortis	Adult			Tampere Museum of Natural History
TACFI	LEFIJ4208-16	JP00937		BOLD:AAL7745	JP00937	658[0n]	2		1					2015-07-03	Phebellia strigifrons	Adult			Tampere Museum of Natural History
TACFI	LEFIJ4209-16	JP00938		BOLD:ACZ7002	JP00938	612[0n]	2		1					2015-08-05	Myxexoristops arctica	Adult			Tampere Museum of Natural History
TACFI	LEFIJ4210-16	JP00939			JP00939	0[n]	2		1					2015-05-26	Entomophaga nigrohalterata	Adult			Tampere Museum of Natural History
TACFI	LEFIJ4211-16	JP00940		BOLD:ACF7922	JP00940	626[0n]	2		1					2015-08-16	Synactia parvula	Adult			Tampere Museum of Natural History
TACFI	LEFIJ4212-16	JP00941		BOLD:ACG6905	JP00941	658[0n]	2		1					2013-06-20	Phebellia glauca	Adult			Tampere Museum of Natural History
TACFI	LEFIJ4213-16	JP00942			JP00942	0[n]	2		1					2010-09-17	Cylindromyia rufipes	Adult			Tampere Museum of Natural History
TACFI	LEFIJ4214-16	JP00943		BOLD:AAP8653	JP00943	626[0n]	2		1					2015-01-01	Lydella thompsoni	Adult			Tampere Museum of Natural History
TACFI	LEFIJ4215-16	JP00944		BOLD:AAG2175	JP00944	658[0n]	2		1					2013-06-19	Periscepsia	Adult			Tampere Museum of Natural History
TACFI	LEFIJ4216-16	JP00945			JP00945	0[n]	2		1					2013-07-13	Periscepsia	Adult			Tampere Museum of Natural History
TACFI	LEFIJ4217-16	JP00946		BOLD:ADA0499	JP00946	658[0n]	2		1					2013-07-09	Trigonospila ludio	Adult			Tampere Museum of Natural History

## Sheet: Voucher
Sample ID	Field ID	Museum ID	Collection Code	Institution Storing
lampe00002	lampe00002	lampe00002		Research Collection of Petri Lampila
lampe00003	lampe00003	lampe00003		Research Collection of Petri Lampila
lampe00004	lampe00004	lampe00004		Research Collection of Petri Lampila
lampe00005	lampe00005	lampe00005		Research Collection of Petri Lampila
lampe00006	lampe00006	lampe00006		Research Collection of Petri Lampila
lampe00007	lampe00007	lampe00007		Research Collection of Petri Lampila
lampe00008	lampe00008	lampe00008		Research Collection of Petri Lampila
lampe00009	lampe00009	lampe00009		Research Collection of Petri Lampila
lampe00010	lampe00010	lampe00010		Research Collection of Petri Lampila
lampe00092	lampe00092	lampe00092		Research Collection of Petri Lampila
lampe00093	lampe00093	lampe00093		Research Collection of Petri Lampila
lampe00094	lampe00094	lampe00094		Research Collection of Petri Lampila
lampe00095	lampe00095	lampe00095		Research Collection of Petri Lampila
JP00001	JP00001	JP00001		Tampere Museum of Natural History
JP00002	JP00002	JP00002		Tampere Museum of Natural History
JP00003	JP00003	JP00003		Tampere Museum of Natural History
JP00004	JP00004	JP00004		Tampere Museum of Natural History
JP00005	JP00005	JP00005		Tampere Museum of Natural History
JP00006	JP00006	JP00006		Tampere Museum of Natural History
JP00007	JP00007	JP00007		Tampere Museum of Natural History
JP00008	JP00008	JP00008		Tampere Museum of Natural History
JP00009	JP00009	JP00009		Tampere Museum of Natural History
JP00010	JP00010	JP00010		Tampere Museum of Natural History
JP00011	JP00011	JP00011		Tampere Museum of Natural History
JP00012	JP00012	JP00012		Tampere Museum of Natural History
JP00013	JP00013	JP00013		Tampere Museum of Natural History
JP00014	JP00014	JP00014		Tampere Museum of Natural History
JP00015	JP00015	JP00015		Tampere Museum of Natural History
JP00016	JP00016	JP00016		Tampere Museum of Natural History
JP00017	JP00017	JP00017		Tampere Museum of Natural History
JP00018	JP00018	JP00018		Tampere Museum of Natural History
JP00019	JP00019	JP00019		Tampere Museum of Natural History
JP00020	JP00020	JP00020		Tampere Museum of Natural History
JP00021	JP00021	JP00021		Tampere Museum of Natural History
JP00022	JP00022	JP00022		Tampere Museum of Natural History
JP00023	JP00023	JP00023		Tampere Museum of Natural History
JP00024	JP00024	JP00024		Tampere Museum of Natural History
JP00025	JP00025	JP00025		Tampere Museum of Natural History
JP00026	JP00026	JP00026		Tampere Museum of Natural History
JP00027	JP00027	JP00027		Tampere Museum of Natural History
JP00028	JP00028	JP00028		Tampere Museum of Natural History
JP00029	JP00029	JP00029		Tampere Museum of Natural History
JP00030	JP00030	JP00030		Tampere Museum of Natural History
JP00031	JP00031	JP00031		Tampere Museum of Natural History
JP00032	JP00032	JP00032		Tampere Museum of Natural History
JP00033	JP00033	JP00033		Tampere Museum of Natural History
JP00034	JP00034	JP00034		Tampere Museum of Natural History
JP00035	JP00035	JP00035		Tampere Museum of Natural History
JP00036	JP00036	JP00036		Tampere Museum of Natural History
JP00037	JP00037	JP00037		Tampere Museum of Natural History
JP00038	JP00038	JP00038		Tampere Museum of Natural History
JP00039	JP00039	JP00039		Tampere Museum of Natural History
JP00040	JP00040	JP00040		Tampere Museum of Natural History
JP00041	JP00041	JP00041		Tampere Museum of Natural History
JP00042	JP00042	JP00042		Tampere Museum of Natural History
JP00043	JP00043	JP00043		Tampere Museum of Natural History
JP00044	JP00044	JP00044		Tampere Museum of Natural History
JP00045	JP00045	JP00045		Tampere Museum of Natural History
JP00046	JP00046	JP00046		Tampere Museum of Natural History
JP00047	JP00047	JP00047		Tampere Museum of Natural History
JP00048	JP00048	JP00048		Tampere Museum of Natural History
JP00050	JP00050	JP00050		Tampere Museum of Natural History
JP00051	JP00051	JP00051		Tampere Museum of Natural History
JP00052	JP00052	JP00052		Tampere Museum of Natural History
JP00053	JP00053	JP00053		Tampere Museum of Natural History
JP00054	JP00054	JP00054		Tampere Museum of Natural History
JP00055	JP00055	JP00055		Tampere Museum of Natural History
JP00056	JP00056	JP00056		Tampere Museum of Natural History
JP00057	JP00057	JP00057		Tampere Museum of Natural History
JP00058	JP00058	JP00058		Tampere Museum of Natural History
JP00059	JP00059	JP00059		Tampere Museum of Natural History
JP00060	JP00060	JP00060		Tampere Museum of Natural History
JP00061	JP00061	JP00061		Tampere Museum of Natural History
JP00062	JP00062	JP00062		Tampere Museum of Natural History
JP00063	JP00063	JP00063		Tampere Museum of Natural History
JP00064	JP00064	JP00064		Tampere Museum of Natural History
JP00065	JP00065	JP00065		Tampere Museum of Natural History
JP00066	JP00066	JP00066		Tampere Museum of Natural History
JP00067	JP00067	JP00067		Tampere Museum of Natural History
JP00068	JP00068	JP00068		Tampere Museum of Natural History
JP00069	JP00069	JP00069		Tampere Museum of Natural History
JP00070	JP00070	JP00070		Tampere Museum of Natural History
JP00071	JP00071	JP00071		Tampere Museum of Natural History
JP00072	JP00072	JP00072		Tampere Museum of Natural History
JP00073	JP00073	JP00073		Tampere Museum of Natural History
JP00074	JP00074	JP00074		Tampere Museum of Natural History
JP00075	JP00075	JP00075		Tampere Museum of Natural History
JP00076	JP00076	JP00076		Tampere Museum of Natural History
JP00077	JP00077	JP00077		Tampere Museum of Natural History
JP00078	JP00078	JP00078		Tampere Museum of Natural History
JP00079	JP00079	JP00079		Tampere Museum of Natural History
JP00080	JP00080	JP00080		Tampere Museum of Natural History
JP00081	JP00081	JP00081		Tampere Museum of Natural History
JP00082	JP00082	JP00082		Tampere Museum of Natural History
JP00083	JP00083	JP00083		Tampere Museum of Natural History
JP00084	JP00084	JP00084		Tampere Museum of Natural History
JP00085	JP00085	JP00085		Tampere Museum of Natural History
JP00086	JP00086	JP00086		Tampere Museum of Natural History
JP00087	JP00087	JP00087		Tampere Museum of Natural History
JP00088	JP00088	JP00088		Tampere Museum of Natural History
JP00089	JP00089	JP00089		Tampere Museum of Natural History
JP00090	JP00090	JP00090		Tampere Museum of Natural History
JP00091	JP00091	JP00091		Tampere Museum of Natural History
JP00092	JP00092	JP00092		Tampere Museum of Natural History
JP00093	JP00093	JP00093		Tampere Museum of Natural History
JP00094	JP00094	JP00094		Tampere Museum of Natural History
JP00095	JP00095	JP00095		Tampere Museum of Natural History
MZH_HP.184	MZH_HP.184	MZH_HP.184	MZH_Diptera	Finnish Museum of Natural History, Zoological Museum
MZH_HP.196	MZH_HP.196	MZH_HP.196	MZH_Diptera	Finnish Museum of Natural History, Zoological Museum
MZH_HP.197	MZH_HP.197	MZH_HP.197	MZH_Diptera	Finnish Museum of Natural History, Zoological Museum
MZH_HP.198	MZH_HP.198	MZH_HP.198	MZH_Diptera	Finnish Museum of Natural History, Zoological Museum
MZH_HP.199	MZH_HP.199	MZH_HP.199	MZH_Diptera	Finnish Museum of Natural History, Zoological Museum
MZH_HP.200	MZH_HP.200	MZH_HP.200	MZH_Diptera	Finnish Museum of Natural History, Zoological Museum
MZH_HP.244	MZH_HP.244	MZH_HP.244	MZH_Diptera	Finnish Museum of Natural History, Zoological Museum
MZH_HP.245	MZH_HP.245	MZH_HP.245	MZH_Diptera	Finnish Museum of Natural History, Zoological Museum
MZH_HP.246	MZH_HP.246	MZH_HP.246	MZH_Diptera	Finnish Museum of Natural History, Zoological Museum
MZH_HP.257	MZH_HP.257	MZH_HP.257	MZH_Diptera	Finnish Museum of Natural History, Zoological Museum
MZH_HP.259	MZH_HP.259	MZH_HP.259	MZH_Diptera	Finnish Museum of Natural History, Zoological Museum
MZH_HP.282	MZH_HP.282	MZH_HP.282	MZH_Diptera	Finnish Museum of Natural History, Zoological Museum
MZH_HP.324	MZH_HP.324	MZH_HP.324	MZH_Diptera	Finnish Museum of Natural History, Zoological Museum
MZH_HP.338	MZH_HP.338	MZH_HP.338	MZH_Diptera	Finnish Museum of Natural History, Zoological Museum
MZH_HP.339	MZH_HP.339	MZH_HP.339	MZH_Diptera	Finnish Museum of Natural History, Zoological Museum
MZH_HP.347	MZH_HP.347	MZH_HP.347	MZH_Diptera	Finnish Museum of Natural History, Zoological Museum
MZH_HP.358	MZH_HP.358	MZH_HP.358	MZH_Diptera	Finnish Museum of Natural History, Zoological Museum
MZH_HP.359	MZH_HP.359	MZH_HP.359	MZH_Diptera	Finnish Museum of Natural History, Zoological Museum
MZH_HP.360	MZH_HP.360	MZH_HP.360	MZH_Diptera	Finnish Museum of Natural History, Zoological Museum
MZH_HP.362	MZH_HP.362	MZH_HP.362	MZH_Diptera	Finnish Museum of Natural History, Zoological Museum
MZH_HP.363	MZH_HP.363	MZH_HP.363	MZH_Diptera	Finnish Museum of Natural History, Zoological Museum
MZH_HP.374	MZH_HP.374	MZH_HP.374	MZH_Diptera	Finnish Museum of Natural History, Zoological Museum
MZH_HP.375	MZH_HP.375	MZH_HP.375	MZH_Diptera	Finnish Museum of Natural History, Zoological Museum
MZH_HP.376	MZH_HP.376	MZH_HP.376	MZH_Diptera	Finnish Museum of Natural History, Zoological Museum
MZH_HP.378	MZH_HP.378	MZH_HP.378	MZH_Diptera	Finnish Museum of Natural History, Zoological Museum
MZH_HP.379	MZH_HP.379	MZH_HP.379	MZH_Diptera	Finnish Museum of Natural History, Zoological Museum
MZH_HP.380	MZH_HP.380	MZH_HP.380	MZH_Diptera	Finnish Museum of Natural History, Zoological Museum
MZH_HP.381	MZH_HP.381	MZH_HP.381	MZH_Diptera	Finnish Museum of Natural History, Zoological Museum
MZH_HP.382	MZH_HP.382	MZH_HP.382	MZH_Diptera	Finnish Museum of Natural History, Zoological Museum
MZH_HP.383	MZH_HP.383	MZH_HP.383	MZH_Diptera	Finnish Museum of Natural History, Zoological Museum
MZH_HP.384	MZH_HP.384	MZH_HP.384	MZH_Diptera	Finnish Museum of Natural History, Zoological Museum
MZH_HP.385	MZH_HP.385	MZH_HP.385	MZH_Diptera	Finnish Museum of Natural History, Zoological Museum
MZH_HP.386	MZH_HP.386	MZH_HP.386	MZH_Diptera	Finnish Museum of Natural History, Zoological Museum
MZH_HP.407	MZH_HP.407	MZH_HP.407	MZH_Diptera	Finnish Museum of Natural History, Zoological Museum
MZH_HP.445	MZH_HP.445	MZH_HP.445	MZH_Diptera	Finnish Museum of Natural History, Zoological Museum
MHZ_HP.492	MHZ_HP.492	MHZ_HP.492	MZH_Diptera	Finnish Museum of Natural History, Zoological Museum
MHZ_HP.493	MHZ_HP.493	MHZ_HP.493	MZH_Diptera	Finnish Museum of Natural History, Zoological Museum
MHZ_HP.536	MHZ_HP.536	MHZ_HP.536	MZH_Diptera	Finnish Museum of Natural History, Zoological Museum
MZH_GV.3474	jka11-00136	MZH_GV.3474	MZH	University of Helsinki
MZH_GV.3512	jka11-02352	MZH_GV.3512	MZH	University of Helsinki
MZH_GV.3205	jka11-02202		MZH	University of Helsinki
MZH_GV.3217	jka11-02217		MZH	University of Helsinki
MZH_GV.3233	jka11-02236		MZH	University of Helsinki
MZH_GV.3277	jka11-02267		MZH	University of Helsinki
MZH_GV.3278	jka11-02277		MZH	University of Helsinki
MZH_GV.3279	jka11-02280		MZH	University of Helsinki
MZH_GV.3280	jka11-02257		MZH	University of Helsinki
MZH_GV.3281	jka11-02254		MZH	University of Helsinki
jka11-02259	jka11-02259	jka11-02259		Personal Collection of J. Kahanpaeae
MZH_HP.588	MZH_HP.588	MZH_HP.588	MZH_Diptera	Finnish Museum of Natural History, Zoological Museum
MZH_HP.589	MZH_HP.589	MZH_HP.589	MZH_Diptera	Finnish Museum of Natural History, Zoological Museum
MZH_HP.590	MZH_HP.590	MZH_HP.590	MZH_Diptera	Finnish Museum of Natural History, Zoological Museum
MZH_HP.591	MZH_HP.591	MZH_HP.591	MZH_Diptera	Finnish Museum of Natural History, Zoological Museum
MZH_HP.592	MZH_HP.592	MZH_HP.592	MZH_Diptera	Finnish Museum of Natural History, Zoological Museum
MZH_HP.593	MZH_HP.593	MZH_HP.593	MZH_Diptera	Finnish Museum of Natural History, Zoological Museum
MZH_HP.751	MZH_HP.751	MZH_HP.751	MZH_Diptera	Finnish Museum of Natural History, Zoological Museum
MZH_HP.818	MZH_HP.818	MZH_HP.818	MZH_Diptera	Finnish Museum of Natural History, Zoological Museum
MZH_HP.925	MZH_HP.925	MZH_HP.925	MZH_Diptera	Finnish Museum of Natural History, Zoological Museum
JP00201		JP00201		Tampere Museum of Natural History
JP00202		JP00202		Tampere Museum of Natural History
JP00203		JP00203		Tampere Museum of Natural History
JP00204		JP00204		Tampere Museum of Natural History
JP00205		JP00205		Tampere Museum of Natural History
JP00206		JP00206		Tampere Museum of Natural History
JP00207		JP00207		Tampere Museum of Natural History
JP00208		JP00208		Tampere Museum of Natural History
JP00209		JP00209		Tampere Museum of Natural History
JP00210		JP00210		Tampere Museum of Natural History
JP00211		JP00211		Tampere Museum of Natural History
JP00212		JP00212		Tampere Museum of Natural History
JP00213		JP00213		Tampere Museum of Natural History
JP00214		JP00214		Tampere Museum of Natural History
JP00215		JP00215		Tampere Museum of Natural History
JP00216		JP00216		Tampere Museum of Natural History
JP00217		JP00217		Tampere Museum of Natural History
JP00218		JP00218		Tampere Museum of Natural History
JP00219		JP00219		Tampere Museum of Natural History
JP00220		JP00220		Tampere Museum of Natural History
JP00221		JP00221		Tampere Museum of Natural History
JP00222		JP00222		Tampere Museum of Natural History
JP00223		JP00223		Tampere Museum of Natural History
JP00224		JP00224		Tampere Museum of Natural History
JP00225		JP00225		Tampere Museum of Natural History
JP00226		JP00226		Tampere Museum of Natural History
JP00227		JP00227		Tampere Museum of Natural History
JP00228		JP00228		Tampere Museum of Natural History
JP00229		JP00229		Tampere Museum of Natural History
JP00230		JP00230		Tampere Museum of Natural History
JP00231		JP00231		Tampere Museum of Natural History
JP00232		JP00232		Tampere Museum of Natural History
JP00233		JP00233		Tampere Museum of Natural History
JP00234		JP00234		Tampere Museum of Natural History
JP00235		JP00235		Tampere Museum of Natural History
JP00236		JP00236		Tampere Museum of Natural History
JP00237		JP00237		Tampere Museum of Natural History
JP00238		JP00238		Tampere Museum of Natural History
JP00239		JP00239		Tampere Museum of Natural History
JP00240		JP00240		Tampere Museum of Natural History
JP00241		JP00241		Tampere Museum of Natural History
JP00242		JP00242		Tampere Museum of Natural History
JP00243		JP00243		Tampere Museum of Natural History
JP00244		JP00244		Tampere Museum of Natural History
JP00245		JP00245		Tampere Museum of Natural History
JP00246		JP00246		Tampere Museum of Natural History
JP00247		JP00247		Tampere Museum of Natural History
JP00248		JP00248		Tampere Museum of Natural History
JP00249		JP00249		Tampere Museum of Natural History
JP00250		JP00250		Tampere Museum of Natural History
JP00251		JP00251		Tampere Museum of Natural History
JP00252		JP00252		Tampere Museum of Natural History
JP00253		JP00253		Tampere Museum of Natural History
JP00254		JP00254		Tampere Museum of Natural History
JP00255		JP00255		Tampere Museum of Natural History
JP00256		JP00256		Tampere Museum of Natural History
JP00257		JP00257		Tampere Museum of Natural History
JP00258		JP00258		Tampere Museum of Natural History
JP00259		JP00259		Tampere Museum of Natural History
JP00260		JP00260		Tampere Museum of Natural History
JP00261		JP00261		Tampere Museum of Natural History
JP00262		JP00262		Tampere Museum of Natural History
JP00263		JP00263		Tampere Museum of Natural History
JP00264		JP00264		Tampere Museum of Natural History
JP00265		JP00265		Tampere Museum of Natural History
JP00266		JP00266		Tampere Museum of Natural History
JP00267		JP00267		Tampere Museum of Natural History
JP00268		JP00268		Tampere Museum of Natural History
JP00269		JP00269		Tampere Museum of Natural History
JP00270		JP00270		Tampere Museum of Natural History
JP00271		JP00271		Tampere Museum of Natural History
JP00272		JP00272		Tampere Museum of Natural History
JP00273		JP00273		Tampere Museum of Natural History
JP00274		JP00274		Tampere Museum of Natural History
JP00275		JP00275		Tampere Museum of Natural History
JP00276		JP00276		Tampere Museum of Natural History
JP00277		JP00277		Tampere Museum of Natural History
JP00278		JP00278		Tampere Museum of Natural History
JP00279		JP00279		Tampere Museum of Natural History
JP00280		JP00280		Tampere Museum of Natural History
JP00281		JP00281		Tampere Museum of Natural History
JP00282		JP00282		Tampere Museum of Natural History
JP00283		JP00283		Tampere Museum of Natural History
JP00284		JP00284		Tampere Museum of Natural History
JP00285		JP00285		Tampere Museum of Natural History
JP00286		JP00286		Tampere Museum of Natural History
JP00287		JP00287		Tampere Museum of Natural History
JP00288		JP00288		Tampere Museum of Natural History
JP00289		JP00289		Tampere Museum of Natural History
JP00290		JP00290		Tampere Museum of Natural History
JP00291		JP00291		Tampere Museum of Natural History
JP00292		JP00292		Tampere Museum of Natural History
JP00293		JP00293		Tampere Museum of Natural History
JP00294		JP00294		Tampere Museum of Natural History
JP00295		JP00295		Tampere Museum of Natural History
MZH_GV.3522	MZH_GV.3522	MZH_GV.3522	MZH	University of Helsinki
MZH_GV.3524	MZH_GV.3524	MZH_GV.3524	MZH	University of Helsinki
MZH_GV.3529	MZH_GV.3529	MZH_GV.3529	MZH	University of Helsinki
JP00101		JP00101		Tampere Museum of Natural History
JP00102		JP00102		Tampere Museum of Natural History
JP00103		JP00103		Tampere Museum of Natural History
JP00104		JP00104		Tampere Museum of Natural History
JP00105		JP00105		Tampere Museum of Natural History
JP00106		JP00106		Tampere Museum of Natural History
JP00107		JP00107		Tampere Museum of Natural History
JP00108		JP00108		Tampere Museum of Natural History
JP00109		JP00109		Tampere Museum of Natural History
JP00110		JP00110		Tampere Museum of Natural History
JP00111		JP00111		Tampere Museum of Natural History
JP00112		JP00112		Tampere Museum of Natural History
JP00113		JP00113		Tampere Museum of Natural History
JP00114		JP00114		Tampere Museum of Natural History
JP00115		JP00115		Tampere Museum of Natural History
JP00116		JP00116		Tampere Museum of Natural History
JP00117		JP00117		Tampere Museum of Natural History
JP00118		JP00118		Tampere Museum of Natural History
JP00119		JP00119		Tampere Museum of Natural History
JP00120		JP00120		Tampere Museum of Natural History
JP00121		JP00121		Tampere Museum of Natural History
JP00122		JP00122		Tampere Museum of Natural History
JP00123		JP00123		Tampere Museum of Natural History
JP00124		JP00124		Tampere Museum of Natural History
JP00125		JP00125		Tampere Museum of Natural History
JP00126		JP00126		Tampere Museum of Natural History
JP00127		JP00127		Tampere Museum of Natural History
JP00128		JP00128		Tampere Museum of Natural History
JP00129		JP00129		Tampere Museum of Natural History
JP00130		JP00130		Tampere Museum of Natural History
JP00131		JP00131		Tampere Museum of Natural History
JP00132		JP00132		Tampere Museum of Natural History
JP00133		JP00133		Tampere Museum of Natural History
JP00134		JP00134		Tampere Museum of Natural History
JP00135		JP00135		Tampere Museum of Natural History
JP00136		JP00136		Tampere Museum of Natural History
JP00137		JP00137		Tampere Museum of Natural History
JP00138		JP00138		Tampere Museum of Natural History
JP00139		JP00139		Tampere Museum of Natural History
JP00140		JP00140		Tampere Museum of Natural History
JP00141		JP00141		Tampere Museum of Natural History
JP00142		JP00142		Tampere Museum of Natural History
JP00143		JP00143		Tampere Museum of Natural History
JP00144		JP00144		Tampere Museum of Natural History
JP00145		JP00145		Tampere Museum of Natural History
JP00146		JP00146		Tampere Museum of Natural History
JP00147		JP00147		Tampere Museum of Natural History
JP00148		JP00148		Tampere Museum of Natural History
JP00149		JP00149		Tampere Museum of Natural History
JP00150		JP00150		Tampere Museum of Natural History
JP00151		JP00151		Tampere Museum of Natural History
JP00152		JP00152		Tampere Museum of Natural History
JP00153		JP00153		Tampere Museum of Natural History
JP00154		JP00154		Tampere Museum of Natural History
JP00155		JP00155		Tampere Museum of Natural History
JP00156		JP00156		Tampere Museum of Natural History
JP00157		JP00157		Tampere Museum of Natural History
JP00158		JP00158		Tampere Museum of Natural History
JP00159		JP00159		Tampere Museum of Natural History
JP00160		JP00160		Tampere Museum of Natural History
JP00161		JP00161		Tampere Museum of Natural History
JP00162		JP00162		Tampere Museum of Natural History
JP00163		JP00163		Tampere Museum of Natural History
JP00164		JP00164		Tampere Museum of Natural History
JP00165		JP00165		Tampere Museum of Natural History
JP00166		JP00166		Tampere Museum of Natural History
JP00167		JP00167		Tampere Museum of Natural History
JP00168		JP00168		Tampere Museum of Natural History
JP00169		JP00169		Tampere Museum of Natural History
JP00170		JP00170		Tampere Museum of Natural History
JP00171		JP00171		Tampere Museum of Natural History
JP00172		JP00172		Tampere Museum of Natural History
JP00173		JP00173		Tampere Museum of Natural History
JP00174		JP00174		Tampere Museum of Natural History
JP00175		JP00175		Tampere Museum of Natural History
JP00176		JP00176		Tampere Museum of Natural History
JP00177		JP00177		Tampere Museum of Natural History
JP00178		JP00178		Tampere Museum of Natural History
JP00179		JP00179		Tampere Museum of Natural History
JP00180		JP00180		Tampere Museum of Natural History
JP00181		JP00181		Tampere Museum of Natural History
JP00182		JP00182		Tampere Museum of Natural History
JP00183		JP00183		Tampere Museum of Natural History
JP00184		JP00184		Tampere Museum of Natural History
JP00185		JP00185		Tampere Museum of Natural History
JP00186		JP00186		Tampere Museum of Natural History
JP00187		JP00187		Tampere Museum of Natural History
JP00188		JP00188		Tampere Museum of Natural History
JP00189		JP00189		Tampere Museum of Natural History
JP00190		JP00190		Tampere Museum of Natural History
JP00191		JP00191		Tampere Museum of Natural History
JP00192		JP00192		Tampere Museum of Natural History
JP00193		JP00193		Tampere Museum of Natural History
JP00194		JP00194		Tampere Museum of Natural History
JP00195		JP00195		Tampere Museum of Natural History
jka11-01724		HP.1350	MZH	University of Helsinki
jka11-00489		HP.1363	MZH	University of Helsinki
jka11-01645		HP.1401	MZH	University of Helsinki
jka11-00705		HP.994	MZH	University of Helsinki
jka11-00770		HP.1010	MZH	University of Helsinki
jka11-00839		HP.1028	MZH	University of Helsinki
jka11-00898		HP.1034	MZH	University of Helsinki
jka11-00903		HP.1035	MZH	University of Helsinki
jka11-00899		HP.1040	MZH	University of Helsinki
jka11-00965		HP.1044	MZH	University of Helsinki
jka11-01060		HP.1053	MZH	University of Helsinki
jka11-01055		HP.1056	MZH	University of Helsinki
JP00301		JP00301		Tampere Museum of Natural History
JP00302		JP00302		Tampere Museum of Natural History
JP00303		JP00303		Humboldt Universitaet Berlin, Museum fuer Naturkunde
JP00304		JP00304		Tampere Museum of Natural History
JP00305		JP00305		Tampere Museum of Natural History
JP00306		JP00306		Tampere Museum of Natural History
JP00307		JP00307		Humboldt Universitaet Berlin, Museum fuer Naturkunde
JP00308		JP00308		Tampere Museum of Natural History
JP00309		JP00309		Tampere Museum of Natural History
JP00310		JP00310		Tampere Museum of Natural History
JP00311		JP00311		Tampere Museum of Natural History
JP00312		JP00312		Tampere Museum of Natural History
JP00313		JP00313		Tampere Museum of Natural History
JP00314		JP00314		Tampere Museum of Natural History
JP00315		JP00315		Tampere Museum of Natural History
JP00316		JP00316		Tampere Museum of Natural History
JP00317		JP00317		Humboldt Universitaet Berlin, Museum fuer Naturkunde
JP00318		JP00318		Tampere Museum of Natural History
JP00319		JP00319		Tampere Museum of Natural History
JP00320		JP00320		Tampere Museum of Natural History
JP00321		JP00321		Tampere Museum of Natural History
JP00322		JP00322		Tampere Museum of Natural History
JP00323		JP00323		Tampere Museum of Natural History
JP00324		JP00324		Tampere Museum of Natural History
JP00325		JP00325		Tampere Museum of Natural History
JP00326		JP00326		Tampere Museum of Natural History
JP00327		JP00327		Tampere Museum of Natural History
JP00328		JP00328		Tampere Museum of Natural History
JP00329		JP00329		Tampere Museum of Natural History
JP00330		JP00330		Tampere Museum of Natural History
JP00331		JP00331		Tampere Museum of Natural History
JP00332		JP00332		Tampere Museum of Natural History
JP00333		JP00333		Tampere Museum of Natural History
JP00334		JP00334		Tampere Museum of Natural History
JP00335		JP00335		Tampere Museum of Natural History
JP00336		JP00336		Tampere Museum of Natural History
JP00337		JP00337		Tampere Museum of Natural History
JP00338		JP00338		Tampere Museum of Natural History
JP00339		JP00339		Tampere Museum of Natural History
JP00340		JP00340		Tampere Museum of Natural History
JP00341		JP00341		Tampere Museum of Natural History
JP00342		JP00342		Tampere Museum of Natural History
JP00343		JP00343		Tampere Museum of Natural History
JP00344		JP00344		Tampere Museum of Natural History
JP00345		JP00345		Tampere Museum of Natural History
JP00346		JP00346		Tampere Museum of Natural History
JP00347		JP00347		Tampere Museum of Natural History
JP00348		JP00348		Tampere Museum of Natural History
JP00349		JP00349		Tampere Museum of Natural History
JP00350		JP00350		Tampere Museum of Natural History
JP00351		JP00351		Tampere Museum of Natural History
JP00352		JP00352		Tampere Museum of Natural History
JP00353		JP00353		Tampere Museum of Natural History
JP00354		JP00354		Tampere Museum of Natural History
JP00355		JP00355		Tampere Museum of Natural History
JP00356		JP00356		Tampere Museum of Natural History
JP00357		JP00357		Tampere Museum of Natural History
JP00358		JP00358		Tampere Museum of Natural History
JP00359		JP00359		Tampere Museum of Natural History
JP00360		JP00360		Tampere Museum of Natural History
JP00361		JP00361		Tampere Museum of Natural History
JP00362		JP00362		Tampere Museum of Natural History
JP00363		JP00363		Tampere Museum of Natural History
JP00364		JP00364		Tampere Museum of Natural History
JP00365		JP00365		Tampere Museum of Natural History
JP00366		JP00366		Tampere Museum of Natural History
JP00367		JP00367		Tampere Museum of Natural History
jka09-05298		jka09-05298	MZH	University of Helsinki
JKA12-0931		JKA12-0931	MZH	University of Helsinki
jka09-04981		jka09-04981	MZH	University of Helsinki
jka07-05559		jka07-05559	MZH	University of Helsinki
jka07-05568		jka07-05568	MZH	University of Helsinki
JKA12-0933		JKA12-0933	MZH	University of Helsinki
jka-05-02928		jka-05-02928	MZH	University of Helsinki
JKA12-0932		JKA12-0932	MZH	University of Helsinki
jka-05-00451		jka-05-00451	MZH	University of Helsinki
jka08-00455		jka08-00455	MZH	University of Helsinki
JKA12-0935		JKA12-0935	MZH	University of Helsinki
jka09-05729		jka09-05729	MZH	University of Helsinki
jka07-04541		jka07-04541	MZH	University of Helsinki
jka06-00525		jka06-00525	MZH	University of Helsinki
jka07-04405		jka07-04405	MZH	University of Helsinki
jka10-00117		jka10-00117	MZH	University of Helsinki
jka09-05552		jka09-05552	MZH	University of Helsinki
jka06-01234		jka06-01234	MZH	University of Helsinki
jka06-01300		jka06-01300	MZH	University of Helsinki
jka07-05432		jka07-05432	MZH	University of Helsinki
JKA12-0936		JKA12-0936	MZH	University of Helsinki
JKA12-0937		JKA12-0937	MZH	University of Helsinki
jka06-02329		jka06-02329	MZH	University of Helsinki
jka09-04283		jka09-04283	MZH	University of Helsinki
jka08-00016		jka08-00016	MZH	University of Helsinki
jka10-02702		jka10-02702	MZH	University of Helsinki
JKA12-0938		JKA12-0938	MZH	University of Helsinki
JKA12-0939		JKA12-0939	MZH	University of Helsinki
jka-05-02998		jka-05-02998	MZH	University of Helsinki
jka10-03381		jka10-03381	MZH	University of Helsinki
jka-05-02092		jka-05-02092	MZH	University of Helsinki
JKA12-0940		JKA12-0940	MZH	University of Helsinki
JKA12-0941		JKA12-0941	MZH	University of Helsinki
jka10-02193		jka10-02193	MZH	University of Helsinki
JKA12-0942		JKA12-0942	MZH	University of Helsinki
JKA12-0943		JKA12-0943	MZH	University of Helsinki
jka-05-03818		jka-05-03818	MZH	University of Helsinki
JKA12-0944		JKA12-0944	MZH	University of Helsinki
JKA12-0945		JKA12-0945	MZH	University of Helsinki
jka06-00105		jka06-00105	MZH	University of Helsinki
JKA12-0946		JKA12-0946	MZH	University of Helsinki
JKA12-0947		JKA12-0947	MZH	University of Helsinki
jka-05-03941		jka-05-03941	MZH	University of Helsinki
jka-05-02972		jka-05-02972	MZH	University of Helsinki
jka07-05418		jka07-05418	MZH	University of Helsinki
jka06-01288		jka06-01288	MZH	University of Helsinki
JKA12-0948		JKA12-0948	MZH	University of Helsinki
JKA12-0949		JKA12-0949	MZH	University of Helsinki
jka07-03019		jka07-03019	MZH	University of Helsinki
jka07-07207		jka07-07207	MZH	University of Helsinki
jka07-06244		jka07-06244	MZH	University of Helsinki
jka07-05442		jka07-05442	MZH	University of Helsinki
jka07-07109		jka07-07109	MZH	University of Helsinki
JKA12-0950		JKA12-0950	MZH	University of Helsinki
jka07-05400		jka07-05400	MZH	University of Helsinki
JKA12-0951		JKA12-0951	MZH	University of Helsinki
jka10-02053		jka10-02053	MZH	University of Helsinki
jka08-00018		jka08-00018	MZH	University of Helsinki
JKA12-0952		JKA12-0952	MZH	University of Helsinki
jka06-00769		jka06-00769	MZH	University of Helsinki
jka10-00738		jka10-00738	MZH	University of Helsinki
JKA12-0953		JKA12-0953	MZH	University of Helsinki
jka10-00231		jka10-00231	MZH	University of Helsinki
JKA12-0954		JKA12-0954	MZH	University of Helsinki
jka06-02728		jka06-02728	MZH	University of Helsinki
jka06-02284		jka06-02284	MZH	University of Helsinki
jka09-04687		jka09-04687	MZH	University of Helsinki
jka06-00491		jka06-00491	MZH	University of Helsinki
JKA12-0955		JKA12-0955	MZH	University of Helsinki
JKA12-0956		JKA12-0956	MZH	University of Helsinki
jka07-06830		jka07-06830	MZH	University of Helsinki
jka07-01818		jka07-01818	MZH	University of Helsinki
JKA12-0957		JKA12-0957	MZH	University of Helsinki
jka07-04069		jka07-04069	MZH	University of Helsinki
jka06-02381		jka06-02381	MZH	University of Helsinki
jka09-05832		jka09-05832	MZH	University of Helsinki
jka06-00482		jka06-00482	MZH	University of Helsinki
jka-05-00342		jka-05-00342	MZH	University of Helsinki
JKA12-0958		JKA12-0958	MZH	University of Helsinki
JKA12-0959		JKA12-0959	MZH	University of Helsinki
jka07-06566		jka07-06566	MZH	University of Helsinki
jka06-00334		jka06-00334	MZH	University of Helsinki
jka06-02638		jka06-02638	MZH	University of Helsinki
JKA12-0960		JKA12-0960	MZH	University of Helsinki
jka06-02375		jka06-02375	MZH	University of Helsinki
jka06-02692		jka06-02692	MZH	University of Helsinki
jka06-01416		jka06-01416	MZH	University of Helsinki
jka07-03528		jka07-03528	MZH	University of Helsinki
jka06-00799		jka06-00799	MZH	University of Helsinki
jka-05-04538		jka-05-04538	MZH	University of Helsinki
JKA12-0961		JKA12-0961	MZH	University of Helsinki
jka07-06463		jka07-06463	MZH	University of Helsinki
JKA12-0962		JKA12-0962	MZH	University of Helsinki
jka07-01836		jka07-01836	MZH	University of Helsinki
jka-05-00258		jka-05-00258	MZH	University of Helsinki
JKA12-0965		JKA12-0965	MZH	University of Helsinki
jka-05-03391		jka-05-03391	MZH	University of Helsinki
JKA12-0966		JKA12-0966	MZH	University of Helsinki
JKA12-0964		JKA12-0964	MZH	University of Helsinki
jka-05-03360		jka-05-03360	MZH	University of Helsinki
jka-05-00763		jka-05-00763	MZH	University of Helsinki
JKA12-0963		JKA12-0963	MZH	University of Helsinki
jka07-03390		jka07-03390	MZH	University of Helsinki
jka07-03842		jka07-03842	MZH	University of Helsinki
jka07-05555		jka07-05555	MZH	University of Helsinki
jka09-05417		jka09-05417	MZH	University of Helsinki
jka07-03328		jka07-03328	MZH	University of Helsinki
jka10-01368		jka10-01368	MZH	University of Helsinki
jka10-02736		jka10-02736	MZH	University of Helsinki
jka10-02151		jka10-02151	MZH	University of Helsinki
JKA12-0967		JKA12-0967	MZH	University of Helsinki
JKA12-0968		JKA12-0968	MZH	University of Helsinki
jka06-01776		jka06-01776	MZH	University of Helsinki
JKA12-0969		JKA12-0969	MZH	University of Helsinki
jka06-01153		jka06-01153	MZH	University of Helsinki
jka10-02269		jka10-02269	MZH	University of Helsinki
JKA12-0971		JKA12-0971	MZH	University of Helsinki
jka10-02524		jka10-02524	MZH	University of Helsinki
JKA12-0972		JKA12-0972	MZH	University of Helsinki
jka10-02249		jka10-02249	MZH	University of Helsinki
jka08-00014		jka08-00014	MZH	University of Helsinki
jka10-02208		jka10-02208	MZH	University of Helsinki
jka08-00649		jka08-00649	MZH	University of Helsinki
jka-05-00788		jka-05-00788	MZH	University of Helsinki
jka06-00285		jka06-00285	MZH	University of Helsinki
jka06-00502		jka06-00502	MZH	University of Helsinki
jka08-00075		jka08-00075	MZH	University of Helsinki
JKA12-0974		JKA12-0974	MZH	University of Helsinki
JKA12-0975		JKA12-0975	MZH	University of Helsinki
jka-05-02932		jka-05-02932	MZH	University of Helsinki
JKA12-0978		JKA12-0978	MZH	University of Helsinki
JKA12-0980		JKA12-0980	MZH	University of Helsinki
JKA12-0981		JKA12-0981	MZH	University of Helsinki
jka06-01317		jka06-01317	MZH	University of Helsinki
JP00601		JP00601		Tampere Museum of Natural History
JP00602		JP00602		Tampere Museum of Natural History
JP00603		JP00603		Tampere Museum of Natural History
JP00604		JP00604		Tampere Museum of Natural History
JP00605		JP00605		Tampere Museum of Natural History
JP00606		JP00606		Tampere Museum of Natural History
JP00607		JP00607		Tampere Museum of Natural History
JP00608		JP00608		Tampere Museum of Natural History
JP00609		JP00609		Tampere Museum of Natural History
JP00610		JP00610		Tampere Museum of Natural History
JP00611		JP00611		Tampere Museum of Natural History
JP00612		JP00612		Tampere Museum of Natural History
JP00613		JP00613		Tampere Museum of Natural History
JP00614		JP00614		Tampere Museum of Natural History
JP00615		JP00615		Tampere Museum of Natural History
JP00616		JP00616		Tampere Museum of Natural History
JP00617		JP00617		Tampere Museum of Natural History
JP00618		JP00618		Tampere Museum of Natural History
JP00619		JP00619		Tampere Museum of Natural History
JP00620		JP00620		Tampere Museum of Natural History
JP00621		JP00621		Tampere Museum of Natural History
JP00622		JP00622		Tampere Museum of Natural History
JP00623		JP00623		Tampere Museum of Natural History
JP00624		JP00624		Tampere Museum of Natural History
JP00625		JP00625		Tampere Museum of Natural History
JP00626		JP00626		Tampere Museum of Natural History
JP00627		JP00627		Tampere Museum of Natural History
JP00628		JP00628		Tampere Museum of Natural History
JP00629		JP00629		Tampere Museum of Natural History
JP00630		JP00630		Tampere Museum of Natural History
JP00631		JP00631		Tampere Museum of Natural History
JP00632		JP00632		Tampere Museum of Natural History
JP00633		JP00633		Tampere Museum of Natural History
JP00634		JP00634		Tampere Museum of Natural History
JP00635		JP00635		Tampere Museum of Natural History
JP00636		JP00636		Tampere Museum of Natural History
JP00637		JP00637		Tampere Museum of Natural History
JP00638		JP00638		Tampere Museum of Natural History
JP00639		JP00639		Tampere Museum of Natural History
JP00640		JP00640		Tampere Museum of Natural History
JP00641		JP00641		Tampere Museum of Natural History
JP00642		JP00642		Tampere Museum of Natural History
JP00643		JP00643		Tampere Museum of Natural History
JP00644		JP00644		Tampere Museum of Natural History
JP00645		JP00645		Tampere Museum of Natural History
JP00646		JP00646		Tampere Museum of Natural History
JP00647		JP00647		Tampere Museum of Natural History
JP00648		JP00648		Tampere Museum of Natural History
JP00649		JP00649		Tampere Museum of Natural History
JP00650		JP00650		Tampere Museum of Natural History
JP00651		JP00651		Tampere Museum of Natural History
JP00652		JP00652		Tampere Museum of Natural History
JP00653		JP00653		Tampere Museum of Natural History
JP00654		JP00654		Tampere Museum of Natural History
JP00655		JP00655		Tampere Museum of Natural History
JP00656		JP00656		Tampere Museum of Natural History
JP00657		JP00657		Tampere Museum of Natural History
JP00658		JP00658		Tampere Museum of Natural History
JP00659		JP00659		Tampere Museum of Natural History
JP00660		JP00660		Tampere Museum of Natural History
JP00661		JP00661		Tampere Museum of Natural History
JP00662		JP00662		Tampere Museum of Natural History
JP00663		JP00663		Tampere Museum of Natural History
JP00664		JP00664		Tampere Museum of Natural History
JP00665		JP00665		Tampere Museum of Natural History
JP00666		JP00666		Tampere Museum of Natural History
JP00667		JP00667		Tampere Museum of Natural History
JP00668		JP00668		Tampere Museum of Natural History
JP00669		JP00669		Tampere Museum of Natural History
JP00670		JP00670		Tampere Museum of Natural History
JP00671		JP00671		Tampere Museum of Natural History
JP00672		JP00672		Tampere Museum of Natural History
JP00673		JP00673		Tampere Museum of Natural History
JP00674		JP00674		Tampere Museum of Natural History
JP00675		JP00675		Tampere Museum of Natural History
JP00676		JP00676		Tampere Museum of Natural History
JP00677		JP00677		Tampere Museum of Natural History
JP00678		JP00678		Tampere Museum of Natural History
JP00679		JP00679		Tampere Museum of Natural History
JP00680		JP00680		Tampere Museum of Natural History
JP00681		JP00681		Tampere Museum of Natural History
JP00682		JP00682		Tampere Museum of Natural History
JP00683		JP00683		Tampere Museum of Natural History
JP00684		JP00684		Tampere Museum of Natural History
JP00685		JP00685		Tampere Museum of Natural History
JP00686		JP00686		Tampere Museum of Natural History
JP00687		JP00687		Tampere Museum of Natural History
JP00688		JP00688		Tampere Museum of Natural History
JP00689		JP00689		Tampere Museum of Natural History
JP00690		JP00690		Tampere Museum of Natural History
JP00691		JP00691		Tampere Museum of Natural History
JP00692		JP00692		Tampere Museum of Natural History
JP00693		JP00693		Tampere Museum of Natural History
JP00694		JP00694		Tampere Museum of Natural History
JP00695		JP00695		Tampere Museum of Natural History
JP00701		JP00701		Tampere Museum of Natural History
JP00702		JP00702		Tampere Museum of Natural History
JP00703		JP00703		Tampere Museum of Natural History
JP00704		JP00704		Tampere Museum of Natural History
JP00705		JP00705		Tampere Museum of Natural History
JP00706		JP00706		Tampere Museum of Natural History
JP00707		JP00707		Tampere Museum of Natural History
JP00708		JP00708		Tampere Museum of Natural History
JP00709		JP00709		Tampere Museum of Natural History
JP00710		JP00710		Tampere Museum of Natural History
JP00711		JP00711		Tampere Museum of Natural History
JP00712		JP00712		Tampere Museum of Natural History
JP00713		JP00713		Tampere Museum of Natural History
JP00714		JP00714		Tampere Museum of Natural History
JP00715		JP00715		Tampere Museum of Natural History
JP00716		JP00716		Tampere Museum of Natural History
JP00717		JP00717		Tampere Museum of Natural History
JP00718		JP00718		Tampere Museum of Natural History
JP00719		JP00719		Tampere Museum of Natural History
JP00720		JP00720		Tampere Museum of Natural History
JP00721		JP00721		Tampere Museum of Natural History
JP00722		JP00722		Tampere Museum of Natural History
JP00723		JP00723		Tampere Museum of Natural History
JP00724		JP00724		Tampere Museum of Natural History
JP00725		JP00725		Tampere Museum of Natural History
JP00726		JP00726		Tampere Museum of Natural History
JP00727		JP00727		Tampere Museum of Natural History
JP00728		JP00728		Tampere Museum of Natural History
JP00729		JP00729		Tampere Museum of Natural History
JP00730		JP00730		Tampere Museum of Natural History
JP00731		JP00731		Tampere Museum of Natural History
JP00733		JP00733		Tampere Museum of Natural History
JP00734		JP00734		Tampere Museum of Natural History
JP00735		JP00735		Tampere Museum of Natural History
JP00736		JP00736		Tampere Museum of Natural History
JP00737		JP00737		Tampere Museum of Natural History
JP00738		JP00738		Tampere Museum of Natural History
JP00739		JP00739		Tampere Museum of Natural History
JP00740		JP00740		Tampere Museum of Natural History
JP00741		JP00741		Tampere Museum of Natural History
JP00742		JP00742		Tampere Museum of Natural History
JP00743		JP00743		Tampere Museum of Natural History
JP00744		JP00744		Tampere Museum of Natural History
JP00745		JP00745		Tampere Museum of Natural History
JP00746		JP00746		Tampere Museum of Natural History
JP00747		JP00747		Tampere Museum of Natural History
JP00748		JP00748		Tampere Museum of Natural History
JP00749		JP00749		Tampere Museum of Natural History
JP00750		JP00750		Tampere Museum of Natural History
JP00751		JP00751		Tampere Museum of Natural History
JP00752		JP00752		Tampere Museum of Natural History
JP00753		JP00753		Tampere Museum of Natural History
JP00754		JP00754		Tampere Museum of Natural History
JP00755		JP00755		Tampere Museum of Natural History
JP00756		JP00756		Tampere Museum of Natural History
JP00757		JP00757		Tampere Museum of Natural History
JP00758		JP00758		Tampere Museum of Natural History
JP00759		JP00759		Tampere Museum of Natural History
JP00760		JP00760		Tampere Museum of Natural History
JP00761		JP00761		Tampere Museum of Natural History
JP00762		JP00762		Tampere Museum of Natural History
JP00763		JP00763		Tampere Museum of Natural History
JP00764		JP00764		Tampere Museum of Natural History
JP00765		JP00765		Tampere Museum of Natural History
JP00766		JP00766		Tampere Museum of Natural History
JP00767		JP00767		Tampere Museum of Natural History
JP00768		JP00768		Tampere Museum of Natural History
JP00769		JP00769		Tampere Museum of Natural History
JP00770		JP00770		Tampere Museum of Natural History
JP00771		JP00771		Tampere Museum of Natural History
JP00772		JP00772		Tampere Museum of Natural History
JP00773		JP00773		Tampere Museum of Natural History
JP00774		JP00774		Tampere Museum of Natural History
JP00775		JP00775		Tampere Museum of Natural History
JP00776		JP00776		Tampere Museum of Natural History
JP00777		JP00777		Tampere Museum of Natural History
JP00778		JP00778		Tampere Museum of Natural History
JP00779		JP00779		Tampere Museum of Natural History
JP00780		JP00780		Tampere Museum of Natural History
JP00781		JP00781		Tampere Museum of Natural History
JP00782		JP00782		Tampere Museum of Natural History
JP00783		JP00783		Tampere Museum of Natural History
JP00784		JP00784		Tampere Museum of Natural History
JP00785		JP00785		Tampere Museum of Natural History
JP00786		JP00786		Tampere Museum of Natural History
JP00787		JP00787		Tampere Museum of Natural History
JP00788		JP00788		Tampere Museum of Natural History
JP00789		JP00789		Tampere Museum of Natural History
JP00790		JP00790		Tampere Museum of Natural History
JP00791		JP00791		Tampere Museum of Natural History
JP00792		JP00792		Tampere Museum of Natural History
JP00793		JP00793		Tampere Museum of Natural History
JP00794		JP00794		Tampere Museum of Natural History
JP00795		JP00795		Tampere Museum of Natural History
JP00501		JP00501		Tampere Museum of Natural History
JP00502		JP00502		Tampere Museum of Natural History
JP00503		JP00503		Tampere Museum of Natural History
JP00504		JP00504		Tampere Museum of Natural History
JP00505		JP00505		Tampere Museum of Natural History
JP00506		JP00506		Tampere Museum of Natural History
JP00507		JP00507		Tampere Museum of Natural History
JP00508		JP00508		Tampere Museum of Natural History
JP00509		JP00509		Tampere Museum of Natural History
JP00510		JP00510		Tampere Museum of Natural History
JP00511		JP00511		Tampere Museum of Natural History
JP00512		JP00512		Tampere Museum of Natural History
JP00513		JP00513		Tampere Museum of Natural History
JP00514		JP00514		Tampere Museum of Natural History
JP00515		JP00515		Tampere Museum of Natural History
JP00516		JP00516		Tampere Museum of Natural History
JP00517		JP00517		Tampere Museum of Natural History
JP00518		JP00518		Tampere Museum of Natural History
JP00519		JP00519		Tampere Museum of Natural History
JP00520		JP00520		Tampere Museum of Natural History
JP00521		JP00521		Tampere Museum of Natural History
JP00522		JP00522		Tampere Museum of Natural History
JP00523		JP00523		Tampere Museum of Natural History
JP00524		JP00524		Tampere Museum of Natural History
JP00525		JP00525		Tampere Museum of Natural History
JP00526		JP00526		Tampere Museum of Natural History
JP00527		JP00527		Tampere Museum of Natural History
JP00528		JP00528		Tampere Museum of Natural History
JP00529		JP00529		Tampere Museum of Natural History
JP00530		JP00530		Tampere Museum of Natural History
JP00531		JP00531		Tampere Museum of Natural History
JP00532		JP00532		Tampere Museum of Natural History
JP00533		JP00533		Tampere Museum of Natural History
JP00534		JP00534		Tampere Museum of Natural History
JP00535		JP00535		Tampere Museum of Natural History
JP00536		JP00536		Tampere Museum of Natural History
JP00537		JP00537		Tampere Museum of Natural History
JP00538		JP00538		Tampere Museum of Natural History
JP00539		JP00539		Tampere Museum of Natural History
JP00540		JP00540		Tampere Museum of Natural History
JP00541		JP00541		Tampere Museum of Natural History
JP00542		JP00542		Tampere Museum of Natural History
JP00543		JP00543		Tampere Museum of Natural History
JP00544		JP00544		Tampere Museum of Natural History
JP00545		JP00545		Tampere Museum of Natural History
JP00546		JP00546		Tampere Museum of Natural History
JP00547		JP00547		Tampere Museum of Natural History
JP00548		JP00548		Tampere Museum of Natural History
JP00549		JP00549		Tampere Museum of Natural History
JP00550		JP00550		Tampere Museum of Natural History
JP00551		JP00551		Tampere Museum of Natural History
JP00552		JP00552		Tampere Museum of Natural History
JP00553		JP00553		Tampere Museum of Natural History
JP00554		JP00554		Tampere Museum of Natural History
JP00555		JP00555		Tampere Museum of Natural History
JP00556		JP00556		Tampere Museum of Natural History
JP00557		JP00557		Tampere Museum of Natural History
JP00558		JP00558		Tampere Museum of Natural History
JP00559		JP00559		Tampere Museum of Natural History
JP00560		JP00560		Tampere Museum of Natural History
JP00561		JP00561		Tampere Museum of Natural History
JP00562		JP00562		Tampere Museum of Natural History
JP00563		JP00563		Tampere Museum of Natural History
JP00564		JP00564		Tampere Museum of Natural History
JP00565		JP00565		Tampere Museum of Natural History
JP00566		JP00566		Tampere Museum of Natural History
JP00567		JP00567		Tampere Museum of Natural History
JP00568		JP00568		Tampere Museum of Natural History
JP00569		JP00569		Tampere Museum of Natural History
JP00570		JP00570		Tampere Museum of Natural History
JP00571		JP00571		Tampere Museum of Natural History
JP00572		JP00572		Tampere Museum of Natural History
JP00573		JP00573		Tampere Museum of Natural History
JP00574		JP00574		Tampere Museum of Natural History
JP00575		JP00575		Tampere Museum of Natural History
JP00576		JP00576		Tampere Museum of Natural History
JP00577		JP00577		Tampere Museum of Natural History
JP00578		JP00578		Tampere Museum of Natural History
JP00579		JP00579		Tampere Museum of Natural History
JP00580		JP00580		Tampere Museum of Natural History
JP00581		JP00581		Tampere Museum of Natural History
JP00582		JP00582		Tampere Museum of Natural History
JP00583		JP00583		Tampere Museum of Natural History
JP00584		JP00584		Tampere Museum of Natural History
JP00585		JP00585		Tampere Museum of Natural History
JP00586		JP00586		Tampere Museum of Natural History
JP00587		JP00587		Tampere Museum of Natural History
JP00588		JP00588		Tampere Museum of Natural History
JP00589		JP00589		Tampere Museum of Natural History
JP00590		JP00590		Tampere Museum of Natural History
JP00591		JP00591		Tampere Museum of Natural History
JP00592		JP00592		Tampere Museum of Natural History
JP00593		JP00593		Tampere Museum of Natural History
JP00594		JP00594		Tampere Museum of Natural History
JP00595		JP00595		Tampere Museum of Natural History
JP00401		JP00401		Tampere Museum of Natural History
JP00402		JP00402		Tampere Museum of Natural History
JP00403		JP00403		Tampere Museum of Natural History
JP00404		JP00404		Tampere Museum of Natural History
JP00405		JP00405		Tampere Museum of Natural History
JP00406		JP00406		Tampere Museum of Natural History
JP00407		JP00407		Tampere Museum of Natural History
JP00408		JP00408		Tampere Museum of Natural History
JP00409		JP00409		Tampere Museum of Natural History
JP00410		JP00410		Tampere Museum of Natural History
JP00411		JP00411		Tampere Museum of Natural History
JP00412		JP00412		Tampere Museum of Natural History
JP00413		JP00413		Tampere Museum of Natural History
JP00414		JP00414		Tampere Museum of Natural History
JP00415		JP00415		Tampere Museum of Natural History
JP00416		JP00416		Tampere Museum of Natural History
JP00417		JP00417		Tampere Museum of Natural History
JP00418		JP00418		Tampere Museum of Natural History
JP00419		JP00419		Tampere Museum of Natural History
JP00420		JP00420		Tampere Museum of Natural History
JP00421		JP00421		Tampere Museum of Natural History
JP00422		JP00422		Tampere Museum of Natural History
JP00423		JP00423		Tampere Museum of Natural History
JP00424		JP00424		Tampere Museum of Natural History
JP00425		JP00425		Tampere Museum of Natural History
JP00426		JP00426		Tampere Museum of Natural History
JP00427		JP00427		Tampere Museum of Natural History
JP00428		JP00428		Tampere Museum of Natural History
JP00429		JP00429		Tampere Museum of Natural History
JP00430		JP00430		Tampere Museum of Natural History
JP00431		JP00431		Tampere Museum of Natural History
JP00432		JP00432		Tampere Museum of Natural History
JP00433		JP00433		Tampere Museum of Natural History
JP00434		JP00434		Tampere Museum of Natural History
JP00435		JP00435		Tampere Museum of Natural History
JP00436		JP00436		Tampere Museum of Natural History
JP00437		JP00437		Tampere Museum of Natural History
JP00438		JP00438		Tampere Museum of Natural History
JP00439		JP00439		Tampere Museum of Natural History
JP00440		JP00440		Tampere Museum of Natural History
JP00441		JP00441		Tampere Museum of Natural History
JP00442		JP00442		Tampere Museum of Natural History
JP00443		JP00443		Tampere Museum of Natural History
JP00444		JP00444		Tampere Museum of Natural History
JP00446		JP00446		Tampere Museum of Natural History
JP00447		JP00447		Tampere Museum of Natural History
JP00448		JP00448		Tampere Museum of Natural History
JP00449		JP00449		Tampere Museum of Natural History
JP00450		JP00450		Tampere Museum of Natural History
JP00451		JP00451		Tampere Museum of Natural History
JP00452		JP00452		Tampere Museum of Natural History
JP00453		JP00453		Tampere Museum of Natural History
JP00454		JP00454		Tampere Museum of Natural History
JP00455		JP00455		Tampere Museum of Natural History
JP00456		JP00456		Tampere Museum of Natural History
JP00457		JP00457		Tampere Museum of Natural History
JP00458		JP00458		Tampere Museum of Natural History
JP00459		JP00459		Tampere Museum of Natural History
JP00460		JP00460		Tampere Museum of Natural History
JP00461		JP00461		Tampere Museum of Natural History
JP00462		JP00462		Tampere Museum of Natural History
JP00463		JP00463		Tampere Museum of Natural History
JP00464		JP00464		Tampere Museum of Natural History
JP00465		JP00465		Tampere Museum of Natural History
JP00466		JP00466		Tampere Museum of Natural History
JP00467		JP00467		Tampere Museum of Natural History
JP00468		JP00468		Tampere Museum of Natural History
JP00469		JP00469		Tampere Museum of Natural History
JP00470		JP00470		Tampere Museum of Natural History
JP00471		JP00471		Staatliches Museum fur Naturkunde Stuttgart
JP00472		JP00472		Staatliches Museum fur Naturkunde Stuttgart
JP00473		JP00473		Staatliches Museum fur Naturkunde Stuttgart
JP00474		JP00474		Staatliches Museum fur Naturkunde Stuttgart
JP00475		JP00475		Staatliches Museum fur Naturkunde Stuttgart
JP00476		JP00476		Staatliches Museum fur Naturkunde Stuttgart
JP00477		JP00477		Staatliches Museum fur Naturkunde Stuttgart
JP00478		JP00478		Staatliches Museum fur Naturkunde Stuttgart
JP00479		JP00479		Staatliches Museum fur Naturkunde Stuttgart
JP00480		JP00480		Staatliches Museum fur Naturkunde Stuttgart
JP00481		JP00481		Staatliches Museum fur Naturkunde Stuttgart
JP00482		JP00482		Staatliches Museum fur Naturkunde Stuttgart
JP00483		JP00483		Staatliches Museum fur Naturkunde Stuttgart
JP00484		JP00484		Staatliches Museum fur Naturkunde Stuttgart
JP00485		JP00485		Staatliches Museum fur Naturkunde Stuttgart
JP00486		JP00486		Staatliches Museum fur Naturkunde Stuttgart
JP00487		JP00487		Staatliches Museum fur Naturkunde Stuttgart
JP00488		JP00488		Staatliches Museum fur Naturkunde Stuttgart
JP00489		JP00489		Staatliches Museum fur Naturkunde Stuttgart
JP00490		JP00490		Staatliches Museum fur Naturkunde Stuttgart
JP00491		JP00491		Staatliches Museum fur Naturkunde Stuttgart
JP00492		JP00492		Staatliches Museum fur Naturkunde Stuttgart
JP00493		JP00493		Staatliches Museum fur Naturkunde Stuttgart
JP00494		JP00494		Staatliches Museum fur Naturkunde Stuttgart
JP00495		JP00495		Staatliches Museum fur Naturkunde Stuttgart
ZMUO.003707		ZMUO.003707	ZMUO	University of Oulu
ZMUO.003708		ZMUO.003708	ZMUO	University of Oulu
JKo12-00189		JKo12-00189		Research Collection of J. Koistinen
AHa12-001306		AHa12-001306	MZH	University of Helsinki
KWi-312		KWi-312		Research Collection of Kaj Winqvist
JKA12-1946	JKA12-1946	JKA12-1946	MZH_Diptera	Finnish Museum of Natural History, Zoological Museum
JKA12-1959	JKA12-1959	JKA12-1959	MZH_Diptera	Finnish Museum of Natural History, Zoological Museum
JKA12-1960	JKA12-1960	JKA12-1960	MZH_Diptera	Finnish Museum of Natural History, Zoological Museum
JKA12-1961	JKA12-1961	JKA12-1961	MZH_Diptera	Finnish Museum of Natural History, Zoological Museum
JKA12-1963	JKA12-1963	JKA12-1963	MZH_Diptera	Finnish Museum of Natural History, Zoological Museum
JKA12-1964	JKA12-1964	JKA12-1964	MZH_Diptera	Finnish Museum of Natural History, Zoological Museum
JKA12-1965	JKA12-1965	JKA12-1965	MZH_Diptera	Finnish Museum of Natural History, Zoological Museum
JKA12-1966	JKA12-1966	JKA12-1966	MZH_Diptera	Finnish Museum of Natural History, Zoological Museum
JKA12-1968	JKA12-1968	JKA12-1968	MZH_Diptera	Finnish Museum of Natural History, Zoological Museum
JKA12-1969	JKA12-1969	JKA12-1969	MZH_Diptera	Finnish Museum of Natural History, Zoological Museum
JKA12-1971	JKA12-1971	JKA12-1971	MZH_Diptera	Finnish Museum of Natural History, Zoological Museum
JKA12-1972	JKA12-1972	JKA12-1972	MZH_Diptera	Finnish Museum of Natural History, Zoological Museum
MZH_HP.1491	MZH_HP.1491	MZH_Diptera		Finnish Museum of Natural History, Zoological Museum
MZH_HP.1517	MZH_HP.1517	MZH_Diptera		Finnish Museum of Natural History, Zoological Museum
MZH_HP.1998	MZH_HP.1998	MZH_Diptera		Finnish Museum of Natural History, Zoological Museum
MZH_HP.1999	MZH_HP.1999	MZH_Diptera		Finnish Museum of Natural History, Zoological Museum
MZH_HP.2003	MZH_HP.2003	MZH_Diptera		Finnish Museum of Natural History, Zoological Museum
JP00801		JP00801		Tampere Museum of Natural History
JP00802		JP00802		Tampere Museum of Natural History
JP00803		JP00803		Tampere Museum of Natural History
JP00804		JP00804		Tampere Museum of Natural History
JP00805		JP00805		Tampere Museum of Natural History
JP00806		JP00806		Tampere Museum of Natural History
JP00807		JP00807		Tampere Museum of Natural History
JP00808		JP00808		Tampere Museum of Natural History
JP00809		JP00809		Tampere Museum of Natural History
JP00810		JP00810		Tampere Museum of Natural History
JP00811		JP00811		Tampere Museum of Natural History
JP00812		JP00812		Tampere Museum of Natural History
JP00813		JP00813		Tampere Museum of Natural History
JP00814		JP00814		Tampere Museum of Natural History
JP00815		JP00815		Tampere Museum of Natural History
JP00816		JP00816		Tampere Museum of Natural History
JP00817		JP00817		Tampere Museum of Natural History
JP00818		JP00818		Tampere Museum of Natural History
JP00819		JP00819		Tampere Museum of Natural History
JP00820		JP00820		Tampere Museum of Natural History
JP00821		JP00821		Tampere Museum of Natural History
JP00822		JP00822		Tampere Museum of Natural History
JP00823		JP00823		Tampere Museum of Natural History
JP00824		JP00824		Tampere Museum of Natural History
JP00825		JP00825		Tampere Museum of Natural History
JP00826		JP00826		Tampere Museum of Natural History
JP00827		JP00827		Tampere Museum of Natural History
JP00828		JP00828		Tampere Museum of Natural History
JP00829		JP00829		Tampere Museum of Natural History
JP00830		JP00830		Tampere Museum of Natural History
JP00831		JP00831		Tampere Museum of Natural History
JP00832		JP00832		Tampere Museum of Natural History
JP00833		JP00833		Tampere Museum of Natural History
JP00834		JP00834		Tampere Museum of Natural History
JP00835		JP00835		Tampere Museum of Natural History
JP00837		JP00837		Tampere Museum of Natural History
JP00838		JP00838		Tampere Museum of Natural History
JP00839		JP00839		Tampere Museum of Natural History
JP00840		JP00840		Tampere Museum of Natural History
JP00841		JP00841		Tampere Museum of Natural History
JP00842		JP00842		Tampere Museum of Natural History
JP00843		JP00843		Tampere Museum of Natural History
JP00844		JP00844		Tampere Museum of Natural History
JP00845		JP00845		Tampere Museum of Natural History
JP00846		JP00846		Tampere Museum of Natural History
JP00847		JP00847		Tampere Museum of Natural History
JP00848		JP00848		Tampere Museum of Natural History
JP00849		JP00849		Tampere Museum of Natural History
JP00850		JP00850		Tampere Museum of Natural History
JP00851		JP00851		Tampere Museum of Natural History
JP00852		JP00852		Tampere Museum of Natural History
JP00853		JP00853		Tampere Museum of Natural History
JP00854		JP00854		Tampere Museum of Natural History
JP00855		JP00855		Tampere Museum of Natural History
JP00856		JP00856		Tampere Museum of Natural History
JP00857		JP00857		Tampere Museum of Natural History
JP00858		JP00858		Tampere Museum of Natural History
JP00859		JP00859		Tampere Museum of Natural History
JP00860		JP00860		Tampere Museum of Natural History
JP00861		JP00861		Tampere Museum of Natural History
JP00862		JP00862		Tampere Museum of Natural History
JP00863		JP00863		Tampere Museum of Natural History
JP00864		JP00864		Tampere Museum of Natural History
JP00865		JP00865		Tampere Museum of Natural History
JP00866		JP00866		Tampere Museum of Natural History
JP00867		JP00867		Tampere Museum of Natural History
JP00868		JP00868		Tampere Museum of Natural History
JP00869		JP00869		Tampere Museum of Natural History
JP00870		JP00870		Tampere Museum of Natural History
JP00871		JP00871		Tampere Museum of Natural History
JP00872		JP00872		Tampere Museum of Natural History
JP00873		JP00873		Tampere Museum of Natural History
JP00874		JP00874		Tampere Museum of Natural History
JP00875		JP00875		Tampere Museum of Natural History
JP00876		JP00876		Tampere Museum of Natural History
JP00877		JP00877		Tampere Museum of Natural History
JP00878		JP00878		Tampere Museum of Natural History
JP00879		JP00879		Tampere Museum of Natural History
JP00880		JP00880		Tampere Museum of Natural History
JP00881		JP00881		Tampere Museum of Natural History
JP00882		JP00882		Tampere Museum of Natural History
JP00883		JP00883		Tampere Museum of Natural History
JP00884		JP00884		Tampere Museum of Natural History
JP00885		JP00885		Tampere Museum of Natural History
JP00886		JP00886		Tampere Museum of Natural History
JP00887		JP00887		Tampere Museum of Natural History
JP00888		JP00888		Tampere Museum of Natural History
JP00889		JP00889		Tampere Museum of Natural History
JP00890		JP00890		Tampere Museum of Natural History
JP00891		JP00891		Tampere Museum of Natural History
JP00892		JP00892		Tampere Museum of Natural History
JP00893		JP00893		Tampere Museum of Natural History
JP00894		JP00894		Tampere Museum of Natural History
JP00895		JP00895		Tampere Museum of Natural History
MZH_HP.684	MZH_HP.684	MZH_HP.684	MZH_Diptera	Finnish Museum of Natural History, Zoological Museum
JP00096		JP00096		Tampere Museum of Natural History
JP00097		JP00097		Tampere Museum of Natural History
JP00098	JP00098	JP00098		Tampere Museum of Natural History
JP00099	JP00099	JP00099		Tampere Museum of Natural History
MZH_HP.2151	MZH_HP.2151	MZH_Diptera		Finnish Museum of Natural History, Zoological Museum
MZH_HP.2152	MZH_HP.2152	MZH_Diptera		Finnish Museum of Natural History, Zoological Museum
MZH_HP.2153	MZH_HP.2153	MZH_Diptera		Finnish Museum of Natural History, Zoological Museum
MZH_HP.2216	MZH_HP.2216	MZH_Diptera		Finnish Museum of Natural History, Zoological Museum
MZH_HP.2261	MZH_HP.2261	MZH_Diptera		Finnish Museum of Natural History, Zoological Museum
MZH_HP.2279	MZH_HP.2279	MZH_Diptera		Finnish Museum of Natural History, Zoological Museum
MZH_HP.2280	MZH_HP.2280	MZH_Diptera		Finnish Museum of Natural History, Zoological Museum
MZH_HP.2281	MZH_HP.2281	MZH_Diptera		Finnish Museum of Natural History, Zoological Museum
MZH_HP.2282	MZH_HP.2282	MZH_Diptera		Finnish Museum of Natural History, Zoological Museum
MZH_HP.2283	MZH_HP.2283	MZH_Diptera		Finnish Museum of Natural History, Zoological Museum
MZH_HP.2284	MZH_HP.2284	MZH_Diptera		Finnish Museum of Natural History, Zoological Museum
MZH_HP.2285	MZH_HP.2285	MZH_Diptera		Finnish Museum of Natural History, Zoological Museum
JP00196	JP00196	JP00196		Tampere Museum of Natural History
JP00197	JKA13-4829	JKA13-4829		Museum Zoological Helsinki
JP00198	JP00198	JP00198		Tampere Museum of Natural History
JP00927		JP00927		Tampere Museum of Natural History
JP00901		JP00901		Tampere Museum of Natural History
JP00902		JP00902		Tampere Museum of Natural History
JP00903		JP00903		Tampere Museum of Natural History
JP00904		JP00904		Tampere Museum of Natural History
JP00905		JP00905		Tampere Museum of Natural History
JP00906		JP00906		Tampere Museum of Natural History
JP00907		JP00907		Tampere Museum of Natural History
JP00908		JP00908		Tampere Museum of Natural History
JP00909		JP00909		Tampere Museum of Natural History
JP00910		JP00910		Tampere Museum of Natural History
JP00911		JP00911		Tampere Museum of Natural History
JP00912		JP00912		Tampere Museum of Natural History
JP00913		JP00913		Tampere Museum of Natural History
JP00914		JP00914		Tampere Museum of Natural History
JP00915		JP00915		Tampere Museum of Natural History
JP00916		JP00916		Tampere Museum of Natural History
JP00917		JP00917		Tampere Museum of Natural History
JP00918		JP00918		Tampere Museum of Natural History
JP00921		JP00921		Tampere Museum of Natural History
JP00922		JP00922		Tampere Museum of Natural History
JP00923		JP00923		Tampere Museum of Natural History
JP00924		JP00924		Tampere Museum of Natural History
JP00925		JP00925		Tampere Museum of Natural History
JP00926		JP00926		Tampere Museum of Natural History
ThZ00001	ThZ00001	ThZ00001		Tampere Museum of Natural History
ZMUO.012846		ZMUO.012846	ZMUO	University of Oulu
JP00100	JP00100	JP00100		Tampere Museum of Natural History
JP00199	JP00199	JP00199		Tampere Museum of Natural History
JP00200	JP00200	JP00200		Tampere Museum of Natural History
AHa14-003401	AHa14-003401	AHa14-003401		Tampere Museum of Natural History
JP00296	JP00296	JP00296		Tampere Museum of Natural History
JP00928	JP00928	JP00928		Tampere Museum of Natural History
JP00929		JP00929		Tampere Museum of Natural History
JP00930		JP00930		Tampere Museum of Natural History
JP00931		JP00931		Tampere Museum of Natural History
JP00932		JP00932		Tampere Museum of Natural History
JP00933		JP00933		Tampere Museum of Natural History
JP00934		JP00934		Tampere Museum of Natural History
JP00935		JP00935		Tampere Museum of Natural History
JP00936		JP00936		Tampere Museum of Natural History
JP00937		JP00937		Tampere Museum of Natural History
JP00938		JP00938		Tampere Museum of Natural History
JP00939		JP00939		Tampere Museum of Natural History
JP00940		JP00940		Tampere Museum of Natural History
JP00941		JP00941		Tampere Museum of Natural History
JP00942		JP00942		Tampere Museum of Natural History
JP00943		JP00943		Tampere Museum of Natural History
JP00944		JP00944		Tampere Museum of Natural History
JP00945		JP00945		Tampere Museum of Natural History
JP00946		JP00946		Tampere Museum of Natural History

## Sheet: Taxonomy
Sample ID	Phylum	Class	Order	Family	Subfamily	Tribe	Genus	Species	Subspecies	Identifier	Identifier Email	Identification Method	Taxonomy Notes
lampe00002	Arthropoda	Insecta	Diptera	Tachinidae	Dexiinae		Eriothrix	Eriothrix rufomaculatus		Petri Lampila	petri.lampila@oulu.fi
lampe00003	Arthropoda	Insecta	Diptera	Tachinidae	Dexiinae		Eriothrix	Eriothrix rufomaculatus		Petri Lampila	petri.lampila@oulu.fi
lampe00004	Arthropoda	Insecta	Diptera	Tachinidae	Exoristinae		Gonia	Gonia ornata		Petri Lampila	petri.lampila@oulu.fi
lampe00005	Arthropoda	Insecta	Diptera	Tachinidae	Phasiinae		Gymnosoma	Gymnosoma nudifrons		Petri Lampila	petri.lampila@oulu.fi
lampe00006	Arthropoda	Insecta	Diptera	Tachinidae	Dexiinae		Dinera	Dinera ferina		Petri Lampila	petri.lampila@oulu.fi
lampe00007	Arthropoda	Insecta	Diptera	Tachinidae	Tachininae		Leskia	Leskia aurea		Petri Lampila	petri.lampila@oulu.fi
lampe00008	Arthropoda	Insecta	Diptera	Tachinidae	Tachininae		Appendicia	Appendicia truncata		Petri Lampila	petri.lampila@oulu.fi
lampe00009	Arthropoda	Insecta	Diptera	Tachinidae	Tachininae		Tachina	Tachina fera		Petri Lampila	petri.lampila@oulu.fi
lampe00010	Arthropoda	Insecta	Diptera	Tachinidae	Dexiinae		Voria	Voria ruralis		Petri Lampila	petri.lampila@oulu.fi
lampe00092	Arthropoda	Insecta	Diptera	Tachinidae	Tachininae		Macquartia	Macquartia dispar		Petri Lampila	petri.lampila@oulu.fi
lampe00093	Arthropoda	Insecta	Diptera	Tachinidae	Exoristinae		Oswaldia	Oswaldia muscaria		Petri Lampila	petri.lampila@oulu.fi
lampe00094	Arthropoda	Insecta	Diptera	Tachinidae	Exoristinae		Belida	Belida angelicae		Petri Lampila	petri.lampila@oulu.fi
lampe00095	Arthropoda	Insecta	Diptera	Tachinidae	Dexiinae		Trixa	Trixa conspersa		Petri Lampila	petri.lampila@oulu.fi
JP00001	Arthropoda	Insecta	Diptera	Tachinidae	Phasiinae		Eliozeta	Eliozeta pellucens		Jaakko L.O. Pohjoismaeki	jaakkop@uef.fi
JP00002	Arthropoda	Insecta	Diptera	Tachinidae	Phasiinae		Subclytia	Subclytia rotundiventris		Jaakko L.O. Pohjoismaeki	jaakkop@uef.fi
JP00003	Arthropoda	Insecta	Diptera	Tachinidae	Phasiinae		Gymnosoma	Gymnosoma clavatum		Jaakko L.O. Pohjoismaeki	jaakkop@uef.fi
JP00004	Arthropoda	Insecta	Diptera	Tachinidae	Phasiinae		Gymnosoma	Gymnosoma dolycoridis		Jaakko L.O. Pohjoismaeki	jaakkop@uef.fi
JP00005	Arthropoda	Insecta	Diptera	Tachinidae	Phasiinae		Gymnosoma	Gymnosoma nudifrons		Jaakko L.O. Pohjoismaeki	jaakkop@uef.fi
JP00006	Arthropoda	Insecta	Diptera	Tachinidae	Phasiinae		Cistogaster	Cistogaster globosa		Jaakko L.O. Pohjoismaeki	jaakkop@uef.fi
JP00007	Arthropoda	Insecta	Diptera	Tachinidae	Phasiinae		Phasia	Phasia pusilla		Jaakko L.O. Pohjoismaeki	jaakkop@uef.fi
JP00008	Arthropoda	Insecta	Diptera	Tachinidae	Phasiinae		Phasia	Phasia aurigera		Jaakko L.O. Pohjoismaeki	jaakkop@uef.fi
JP00009	Arthropoda	Insecta	Diptera	Tachinidae	Phasiinae		Phasia	Phasia aurulans		Jaakko L.O. Pohjoismaeki	jaakkop@uef.fi
JP00010	Arthropoda	Insecta	Diptera	Tachinidae	Phasiinae		Phasia	Phasia hemiptera		Jaakko L.O. Pohjoismaeki	jaakkop@uef.fi
JP00011	Arthropoda	Insecta	Diptera	Tachinidae	Phasiinae		Phasia	Phasia obesa		Jaakko L.O. Pohjoismaeki	jaakkop@uef.fi
JP00012	Arthropoda	Insecta	Diptera	Tachinidae	Phasiinae		Phasia	Phasia barbifrons		Jaakko L.O. Pohjoismaeki	jaakkop@uef.fi
JP00013	Arthropoda	Insecta	Diptera	Tachinidae	Phasiinae		Phasia	Phasia subcoleoptrata		Jaakko L.O. Pohjoismaeki	jaakkop@uef.fi
JP00014	Arthropoda	Insecta	Diptera	Tachinidae	Phasiinae		Catharosia	Catharosia pygmaea		Jaakko L.O. Pohjoismaeki	jaakkop@uef.fi
JP00015	Arthropoda	Insecta	Diptera	Tachinidae	Phasiinae		Cinochira	Cinochira atra		Jaakko L.O. Pohjoismaeki	jaakkop@uef.fi
JP00016	Arthropoda	Insecta	Diptera	Tachinidae	Phasiinae		Lophosia	Lophosia fasciata		Jaakko L.O. Pohjoismaeki	jaakkop@uef.fi
JP00017	Arthropoda	Insecta	Diptera	Tachinidae	Phasiinae		Cylindromyia	Cylindromyia auriceps		Jaakko L.O. Pohjoismaeki	jaakkop@uef.fi
JP00018	Arthropoda	Insecta	Diptera	Tachinidae	Phasiinae		Cylindromyia	Cylindromyia bicolor		Jaakko L.O. Pohjoismaeki	jaakkop@uef.fi
JP00019	Arthropoda	Insecta	Diptera	Tachinidae	Phasiinae		Cylindromyia	Cylindromyia brassicaria		Jaakko L.O. Pohjoismaeki	jaakkop@uef.fi
JP00020	Arthropoda	Insecta	Diptera	Tachinidae	Phasiinae		Cylindromyia	Cylindromyia interrupta		Jaakko L.O. Pohjoismaeki	jaakkop@uef.fi
JP00021	Arthropoda	Insecta	Diptera	Tachinidae	Phasiinae		Cylindromyia	Cylindromyia pusilla		Jaakko L.O. Pohjoismaeki	jaakkop@uef.fi
JP00022	Arthropoda	Insecta	Diptera	Tachinidae	Phasiinae		Besseria	Besseria anthophila		Jaakko L.O. Pohjoismaeki	jaakkop@uef.fi
JP00023	Arthropoda	Insecta	Diptera	Tachinidae	Phasiinae		Phania	Phania curvicauda		Jaakko L.O. Pohjoismaeki	jaakkop@uef.fi
JP00024	Arthropoda	Insecta	Diptera	Tachinidae	Phasiinae		Phania	Phania funesta		Jaakko L.O. Pohjoismaeki	jaakkop@uef.fi
JP00025	Arthropoda	Insecta	Diptera	Tachinidae	Phasiinae		Phania	Phania thoracica		Jaakko L.O. Pohjoismaeki	jaakkop@uef.fi
JP00026	Arthropoda	Insecta	Diptera	Tachinidae	Phasiinae		Ectophasia	Ectophasia crassipennis		Jaakko L.O. Pohjoismaeki	jaakkop@uef.fi
JP00027	Arthropoda	Insecta	Diptera	Tachinidae	Exoristinae		Exorista	Exorista rustica		Jaakko L.O. Pohjoismaeki	jaakkop@uef.fi
JP00028	Arthropoda	Insecta	Diptera	Tachinidae	Exoristinae		Exorista	Exorista fasciata		Jaakko L.O. Pohjoismaeki	jaakkop@uef.fi
JP00029	Arthropoda	Insecta	Diptera	Tachinidae	Exoristinae		Exorista	Exorista grandis		Jaakko L.O. Pohjoismaeki	jaakkop@uef.fi
JP00030	Arthropoda	Insecta	Diptera	Tachinidae	Exoristinae		Exorista	Exorista grandis		Jaakko L.O. Pohjoismaeki	jaakkop@uef.fi
JP00031	Arthropoda	Insecta	Diptera	Tachinidae	Exoristinae		Exorista	Exorista sorbillans		Jaakko L.O. Pohjoismaeki	jaakkop@uef.fi
JP00032	Arthropoda	Insecta	Diptera	Tachinidae	Exoristinae		Exorista	Exorista deligata		Jaakko L.O. Pohjoismaeki	jaakkop@uef.fi
JP00033	Arthropoda	Insecta	Diptera	Tachinidae	Exoristinae		Chetogena	Chetogena tschorsnigi		Jaakko L.O. Pohjoismaeki	jaakkop@uef.fi
JP00034	Arthropoda	Insecta	Diptera	Tachinidae	Exoristinae		Diplostichus	Diplostichus janitrix		Jaakko L.O. Pohjoismaeki	jaakkop@uef.fi
JP00035	Arthropoda	Insecta	Diptera	Tachinidae	Exoristinae		Phorocera	Phorocera obscura		Jaakko L.O. Pohjoismaeki	jaakkop@uef.fi
JP00036	Arthropoda	Insecta	Diptera	Tachinidae	Exoristinae		Bessa	Bessa selecta		Jaakko L.O. Pohjoismaeki	jaakkop@uef.fi
JP00037	Arthropoda	Insecta	Diptera	Tachinidae	Exoristinae		Belida	Belida angelicae		Jaakko L.O. Pohjoismaeki	jaakkop@uef.fi
JP00038	Arthropoda	Insecta	Diptera	Tachinidae	Exoristinae		Meigenia	Meigenia dorsalis		Jaakko L.O. Pohjoismaeki	jaakkop@uef.fi
JP00039	Arthropoda	Insecta	Diptera	Tachinidae	Exoristinae		Meigenia	Meigenia mutabilis		Jaakko L.O. Pohjoismaeki	jaakkop@uef.fi
JP00040	Arthropoda	Insecta	Diptera	Tachinidae	Exoristinae		Meigenia	Meigenia mutabilis		Jaakko L.O. Pohjoismaeki	jaakkop@uef.fi
JP00041	Arthropoda	Insecta	Diptera	Tachinidae	Exoristinae		Zaira	Zaira cinerea		Jaakko L.O. Pohjoismaeki	jaakkop@uef.fi
JP00042	Arthropoda	Insecta	Diptera	Tachinidae	Exoristinae		Staurochaeta	Staurochaeta albocingulata		Jaakko L.O. Pohjoismaeki	jaakkop@uef.fi
JP00043	Arthropoda	Insecta	Diptera	Tachinidae	Exoristinae		Leiophora	Leiophora innoxia		Jaakko L.O. Pohjoismaeki	jaakkop@uef.fi
JP00044	Arthropoda	Insecta	Diptera	Tachinidae	Exoristinae		Admontia	Admontia blanda		Jaakko L.O. Pohjoismaeki	jaakkop@uef.fi
JP00045	Arthropoda	Insecta	Diptera	Tachinidae	Exoristinae		Admontia	Admontia grandicornis		Jaakko L.O. Pohjoismaeki	jaakkop@uef.fi
JP00046	Arthropoda	Insecta	Diptera	Tachinidae	Exoristinae		Oswaldia	Oswaldia muscaria		Jaakko L.O. Pohjoismaeki	jaakkop@uef.fi
JP00047	Arthropoda	Insecta	Diptera	Tachinidae	Exoristinae		Oswaldia	Oswaldia eggeri		Jaakko L.O. Pohjoismaeki	jaakkop@uef.fi
JP00048	Arthropoda	Insecta	Diptera	Tachinidae	Exoristinae		Oswaldia	Oswaldia spectabilis		Jaakko L.O. Pohjoismaeki	jaakkop@uef.fi
JP00050	Arthropoda	Insecta	Diptera	Tachinidae	Tachininae		Aphria	Aphria longirostris		Jaakko L.O. Pohjoismaeki	jaakkop@uef.fi
JP00051	Arthropoda	Insecta	Diptera	Tachinidae	Tachininae		Demoticus	Demoticus plebejus		Jaakko L.O. Pohjoismaeki	jaakkop@uef.fi
JP00052	Arthropoda	Insecta	Diptera	Tachinidae	Tachininae		Leskia	Leskia aurea		Jaakko L.O. Pohjoismaeki	jaakkop@uef.fi
JP00053	Arthropoda	Insecta	Diptera	Tachinidae	Tachininae		Solieria	Solieria pacifica		Jaakko L.O. Pohjoismaeki	jaakkop@uef.fi
JP00054	Arthropoda	Insecta	Diptera	Tachinidae	Tachininae		Solieria	Solieria pacifica		Jaakko L.O. Pohjoismaeki	jaakkop@uef.fi
JP00055	Arthropoda	Insecta	Diptera	Tachinidae	Tachininae		Mintho	Mintho rufiventris		Jaakko L.O. Pohjoismaeki	jaakkop@uef.fi
JP00056	Arthropoda	Insecta	Diptera	Tachinidae	Tachininae		Minthodes	Minthodes picta		Jaakko L.O. Pohjoismaeki	jaakkop@uef.fi
JP00057	Arthropoda	Insecta	Diptera	Tachinidae	Tachininae		Dexiosoma	Dexiosoma caninum		Jaakko L.O. Pohjoismaeki	jaakkop@uef.fi
JP00058	Arthropoda	Insecta	Diptera	Tachinidae	Dexiinae		Trixa	Trixa conspersa		Jaakko L.O. Pohjoismaeki	jaakkop@uef.fi		Dark form
JP00059	Arthropoda	Insecta	Diptera	Tachinidae	Dexiinae		Trixa	Trixa conspersa		Jaakko L.O. Pohjoismaeki	jaakkop@uef.fi		Dark form
JP00060	Arthropoda	Insecta	Diptera	Tachinidae	Dexiinae		Trixa	Trixa conspersa		Jaakko L.O. Pohjoismaeki	jaakkop@uef.fi		dark form
JP00061	Arthropoda	Insecta	Diptera	Tachinidae	Dexiinae		Trixa	Trixa caerulescens		Jaakko L.O. Pohjoismaeki	jaakkop@uef.fi
JP00062	Arthropoda	Insecta	Diptera	Tachinidae	Dexiinae		Trixa	Trixa caerulescens		Jaakko L.O. Pohjoismaeki	jaakkop@uef.fi
JP00063	Arthropoda	Insecta	Diptera	Tachinidae	Dexiinae		Trixa	Trixa caerulescens		Jaakko L.O. Pohjoismaeki	jaakkop@uef.fi
JP00064	Arthropoda	Insecta	Diptera	Tachinidae	Dexiinae		Trixa	Trixa conspersa		Jaakko L.O. Pohjoismaeki	jaakkop@uef.fi
JP00065	Arthropoda	Insecta	Diptera	Tachinidae	Dexiinae		Trixa	Trixa conspersa		Jaakko L.O. Pohjoismaeki	jaakkop@uef.fi
JP00066	Arthropoda	Insecta	Diptera	Tachinidae	Dexiinae		Trixa	Trixa conspersa		Jaakko L.O. Pohjoismaeki	jaakkop@uef.fi
JP00067	Arthropoda	Insecta	Diptera	Tachinidae	Dexiinae		Billaea	Billaea irrorata		Jaakko L.O. Pohjoismaeki	jaakkop@uef.fi
JP00068	Arthropoda	Insecta	Diptera	Tachinidae	Dexiinae		Billaea	Billaea kolomyetzi		Jaakko L.O. Pohjoismaeki	jaakkop@uef.fi
JP00069	Arthropoda	Insecta	Diptera	Tachinidae	Dexiinae		Billaea	Billaea triangulifera		Jaakko L.O. Pohjoismaeki	jaakkop@uef.fi
JP00070	Arthropoda	Insecta	Diptera	Tachinidae	Dexiinae		Dinera	Dinera nr. fuscata		Jaakko L.O. Pohjoismaeki	jaakkop@uef.fi
JP00071	Arthropoda	Insecta	Diptera	Tachinidae	Dexiinae		Dinera	Dinera ferina		Jaakko L.O. Pohjoismaeki	jaakkop@uef.fi
JP00072	Arthropoda	Insecta	Diptera	Tachinidae	Dexiinae		Dinera	Dinera grisescens		Jaakko L.O. Pohjoismaeki	jaakkop@uef.fi
JP00073	Arthropoda	Insecta	Diptera	Tachinidae	Dexiinae		Prosena	Prosena siberita		Jaakko L.O. Pohjoismaeki	jaakkop@uef.fi
JP00074	Arthropoda	Insecta	Diptera	Tachinidae	Dexiinae		Eriothrix	Eriothrix rufomaculatus		Jaakko L.O. Pohjoismaeki	jaakkop@uef.fi
JP00075	Arthropoda	Insecta	Diptera	Tachinidae	Dexiinae		Trafoia	Trafoia monticola		Jaakko L.O. Pohjoismaeki	jaakkop@uef.fi
JP00076	Arthropoda	Insecta	Diptera	Tachinidae	Dexiinae		Campylocheta	Campylocheta fuscinervis		Jaakko L.O. Pohjoismaeki	jaakkop@uef.fi
JP00077	Arthropoda	Insecta	Diptera	Tachinidae	Dexiinae		Campylocheta	Campylocheta inepta		Jaakko L.O. Pohjoismaeki	jaakkop@uef.fi
JP00078	Arthropoda	Insecta	Diptera	Tachinidae	Dexiinae		Campylocheta	Campylocheta praecox		Jaakko L.O. Pohjoismaeki	jaakkop@uef.fi
JP00079	Arthropoda	Insecta	Diptera	Tachinidae	Dexiinae		Blepharomyia	Blepharomyia pagana		Jaakko L.O. Pohjoismaeki	jaakkop@uef.fi
JP00080	Arthropoda	Insecta	Diptera	Tachinidae	Dexiinae		Periscepsia	Periscepsia prunaria		Jaakko L.O. Pohjoismaeki	jaakkop@uef.fi
JP00081	Arthropoda	Insecta	Diptera	Tachinidae	Dexiinae		Periscepsia	Periscepsia ringdahli		Jaakko L.O. Pohjoismaeki	jaakkop@uef.fi
JP00082	Arthropoda	Insecta	Diptera	Tachinidae	Dexiinae		Periscepsia	Periscepsia spathulata		Jaakko L.O. Pohjoismaeki	jaakkop@uef.fi
JP00083	Arthropoda	Insecta	Diptera	Tachinidae	Dexiinae		Wagneria	Wagneria alpina		Jaakko L.O. Pohjoismaeki	jaakkop@uef.fi
JP00084	Arthropoda	Insecta	Diptera	Tachinidae	Dexiinae		Wagneria	Wagneria costata		Jaakko L.O. Pohjoismaeki	jaakkop@uef.fi
JP00085	Arthropoda	Insecta	Diptera	Tachinidae	Dexiinae		Voria	Voria ruralis		Jaakko L.O. Pohjoismaeki	jaakkop@uef.fi
JP00086	Arthropoda	Insecta	Diptera	Tachinidae	Dexiinae		Cyrtophleba	Cyrtophleba ruricola		Jaakko L.O. Pohjoismaeki	jaakkop@uef.fi
JP00087	Arthropoda	Insecta	Diptera	Tachinidae	Dexiinae		Cyrtophleba	Cyrtophleba vernalis		Jaakko L.O. Pohjoismaeki	jaakkop@uef.fi
JP00088	Arthropoda	Insecta	Diptera	Tachinidae	Dexiinae		Phyllomya	Phyllomya volvulus		Jaakko L.O. Pohjoismaeki	jaakkop@uef.fi
JP00089	Arthropoda	Insecta	Diptera	Tachinidae	Dexiinae		Thelaira	Thelaira nigrina		Jaakko L.O. Pohjoismaeki	jaakkop@uef.fi
JP00090	Arthropoda	Insecta	Diptera	Tachinidae	Dexiinae		Dufouria	Dufouria chalybeata		Jaakko L.O. Pohjoismaeki	jaakkop@uef.fi
JP00091	Arthropoda	Insecta	Diptera	Tachinidae	Tachininae		Loewia	Loewia erecta		Jaakko L.O. Pohjoismaeki	jaakkop@uef.fi
JP00092	Arthropoda	Insecta	Diptera	Tachinidae	Dexiinae		Rondania	Rondania dimidiata		Jaakko L.O. Pohjoismaeki	jaakkop@uef.fi
JP00093	Arthropoda	Insecta	Diptera	Tachinidae	Dexiinae		Rondania	Rondania fasciata		Jaakko L.O. Pohjoismaeki	jaakkop@uef.fi
JP00094	Arthropoda	Insecta	Diptera	Tachinidae	Dexiinae		Microsoma	Microsoma exiguum		Jaakko L.O. Pohjoismaeki	jaakkop@uef.fi
JP00095	Arthropoda	Insecta	Diptera	Tachinidae	Dexiinae		Freraea	Freraea gagatea		Jaakko L.O. Pohjoismaeki	jaakkop@uef.fi
MZH_HP.184	Arthropoda	Insecta	Diptera	Tachinidae	Tachininae		Nowickia	Nowickia marklini		Antti Haarto	ahaarto@gmail.com		Previous ID: Nowickia marklini
MZH_HP.196	Arthropoda	Insecta	Diptera	Tachinidae	Dexiinae		Trixa	Trixa caerulescens		Antti Haarto	ahaarto@gmail.com
MZH_HP.197	Arthropoda	Insecta	Diptera	Tachinidae	Dexiinae		Trixa	Trixa conspersa		Antti Haarto	ahaarto@gmail.com
MZH_HP.198	Arthropoda	Insecta	Diptera	Tachinidae	Tachininae		Panzeria	Panzeria rudis		Antti Haarto	ahaarto@gmail.com
MZH_HP.199	Arthropoda	Insecta	Diptera	Tachinidae	Tachininae		Panzeria	Panzeria rudis		Antti Haarto	ahaarto@gmail.com
MZH_HP.200	Arthropoda	Insecta	Diptera	Tachinidae	Phasiinae		Gymnosoma	Gymnosoma nudifrons		Antti Haarto	ahaarto@gmail.com
MZH_HP.244	Arthropoda	Insecta	Diptera	Tachinidae	Exoristinae		Smidtia	Smidtia conspersa		Antti Haarto	ahaarto@gmail.com
MZH_HP.245	Arthropoda	Insecta	Diptera	Tachinidae	Exoristinae		Phorocera	Phorocera obscura		Antti Haarto	ahaarto@gmail.com
MZH_HP.246	Arthropoda	Insecta	Diptera	Tachinidae	Tachininae		Pelatachina	Pelatachina tibialis		Antti Haarto	ahaarto@gmail.com
MZH_HP.257	Arthropoda	Insecta	Diptera	Tachinidae	Exoristinae		Phorocera	Phorocera obscura		Antti Haarto	ahaarto@gmail.com
MZH_HP.259	Arthropoda	Insecta	Diptera	Tachinidae	Tachininae		Actia	Actia lamia		Antti Haarto	ahaarto@gmail.com
MZH_HP.282	Arthropoda	Insecta	Diptera	Tachinidae	Dexiinae		Trixa	Trixa caerulescens		Antti Haarto	ahaarto@gmail.com
MZH_HP.324	Arthropoda	Insecta	Diptera	Tachinidae	Phasiinae		Cylindromyia	Cylindromyia pusilla		Antti Haarto	ahaarto@gmail.com
MZH_HP.338	Arthropoda	Insecta	Diptera	Tachinidae	Phasiinae		Lophosia	Lophosia fasciata		Antti Haarto	ahaarto@gmail.com
MZH_HP.339	Arthropoda	Insecta	Diptera	Tachinidae	Tachininae		Panzeria	Panzeria rudis		Antti Haarto	ahaarto@gmail.com
MZH_HP.347	Arthropoda	Insecta	Diptera	Tachinidae	Phasiinae		Gymnosoma	Gymnosoma nudifrons		Antti Haarto	ahaarto@gmail.com
MZH_HP.358	Arthropoda	Insecta	Diptera	Tachinidae	Exoristinae		Allophorocera	Allophorocera ferruginea		Antti Haarto	ahaarto@gmail.com
MZH_HP.359	Arthropoda	Insecta	Diptera	Tachinidae	Exoristinae		Pales	Pales pavida		Antti Haarto	ahaarto@gmail.com
MZH_HP.360	Arthropoda	Insecta	Diptera	Tachinidae	Dexiinae		Dinera	Dinera ferina		Antti Haarto	ahaarto@gmail.com
MZH_HP.362	Arthropoda	Insecta	Diptera	Tachinidae	Exoristinae		Allophorocera	Allophorocera ferruginea		Antti Haarto	ahaarto@gmail.com
MZH_HP.363	Arthropoda	Insecta	Diptera	Tachinidae	Exoristinae		Allophorocera	Allophorocera ferruginea		Antti Haarto	ahaarto@gmail.com
MZH_HP.374	Arthropoda	Insecta	Diptera	Tachinidae	Phasiinae		Gymnosoma	Gymnosoma nudifrons		Antti Haarto	ahaarto@gmail.com
MZH_HP.375	Arthropoda	Insecta	Diptera	Tachinidae	Exoristinae		Tlephusa	Tlephusa cincinna		Antti Haarto	ahaarto@gmail.com
MZH_HP.376	Arthropoda	Insecta	Diptera	Tachinidae	Exoristinae		Aplomya	Aplomya confinis		Antti Haarto	ahaarto@gmail.com
MZH_HP.378	Arthropoda	Insecta	Diptera	Tachinidae	Exoristinae		Tlephusa	Tlephusa cincinna		Antti Haarto	ahaarto@gmail.com
MZH_HP.379	Arthropoda	Insecta	Diptera	Tachinidae	Exoristinae		Aplomya	Aplomya confinis		Antti Haarto	ahaarto@gmail.com
MZH_HP.380	Arthropoda	Insecta	Diptera	Tachinidae	Exoristinae		Allophorocera	Allophorocera ferruginea		Antti Haarto	ahaarto@gmail.com
MZH_HP.381	Arthropoda	Insecta	Diptera	Tachinidae	Exoristinae		Frontina	Frontina laeta		Antti Haarto	ahaarto@gmail.com
MZH_HP.382	Arthropoda	Insecta	Diptera	Tachinidae	Exoristinae		Frontina	Frontina laeta		Antti Haarto	ahaarto@gmail.com
MZH_HP.383	Arthropoda	Insecta	Diptera	Tachinidae	Tachininae		Eurithia	Eurithia anthophila		Antti Haarto	ahaarto@gmail.com
MZH_HP.384	Arthropoda	Insecta	Diptera	Tachinidae	Tachininae		Eurithia	Eurithia anthophila		Antti Haarto	ahaarto@gmail.com
MZH_HP.385	Arthropoda	Insecta	Diptera	Tachinidae	Tachininae		Loewia	Loewia foeda		Antti Haarto	ahaarto@gmail.com
MZH_HP.386	Arthropoda	Insecta	Diptera	Tachinidae	Phasiinae		Gymnosoma	Gymnosoma nudifrons		Antti Haarto	ahaarto@gmail.com
MZH_HP.407	Arthropoda	Insecta	Diptera	Tachinidae	Exoristinae		Medina			Antti Haarto	ahaarto@gmail.com		sp. nr. collaris
MZH_HP.445	Arthropoda	Insecta	Diptera	Tachinidae	Tachininae		Dexiosoma	Dexiosoma caninum		Antti Haarto	ahaarto@gmail.com
MHZ_HP.492	Arthropoda	Insecta	Diptera	Tachinidae	Phasiinae		Cistogaster	Cistogaster globosa		Antti Haarto	ahaarto@gmail.com
MHZ_HP.493	Arthropoda	Insecta	Diptera	Tachinidae	Dexiinae		Eriothrix	Eriothrix rufomaculatus		Antti Haarto	ahaarto@gmail.com
MHZ_HP.536	Arthropoda	Insecta	Diptera	Tachinidae	Exoristinae		Exorista	Exorista rustica		Antti Haarto	ahaarto@gmail.com
MZH_GV.3474	Arthropoda	Insecta	Diptera	Tachinidae	Exoristinae		Medina	Medina separata		Jere Kahanpaa	jere.kahanpaa@helsinki.fi
MZH_GV.3512	Arthropoda	Insecta	Diptera	Tachinidae	Exoristinae		Phryxe	Phryxe magnicornis		Jere Kahanpaa	jere.kahanpaa@helsinki.fi
MZH_GV.3205	Arthropoda	Insecta	Diptera	Tachinidae	Dexiinae		Periscepsia	Periscepsia spathulata		Jere Kahanpaa	jere.kahanpaa@helsinki.fi
MZH_GV.3217	Arthropoda	Insecta	Diptera	Tachinidae	Phasiinae		Cinochira	Cinochira atra		Jere Kahanpaa	jere.kahanpaa@helsinki.fi
MZH_GV.3233	Arthropoda	Insecta	Diptera	Tachinidae	Dexiinae		Freraea	Freraea gagatea		Jere Kahanpaa	jere.kahanpaa@helsinki.fi
MZH_GV.3277	Arthropoda	Insecta	Diptera	Tachinidae	Tachininae		Appendicia	Appendicia truncata		Jere Kahanpaa	jere.kahanpaa@helsinki.fi
MZH_GV.3278	Arthropoda	Insecta	Diptera	Tachinidae	Exoristinae		Winthemia	Winthemia quadripustulata		Jere Kahanpaa	jere.kahanpaa@helsinki.fi
MZH_GV.3279	Arthropoda	Insecta	Diptera	Tachinidae	Tachininae		Macquartia	Macquartia viridana		Jere Kahanpaa	jere.kahanpaa@helsinki.fi
MZH_GV.3280	Arthropoda	Insecta	Diptera	Tachinidae	Tachininae		Actia	Actia pilipennis		Jere Kahanpaa	jere.kahanpaa@helsinki.fi
MZH_GV.3281	Arthropoda	Insecta	Diptera	Tachinidae	Tachininae		Lypha	Lypha dubia		Jere Kahanpaa	jere.kahanpaa@helsinki.fi
jka11-02259	Arthropoda	Insecta	Diptera	Tachinidae	Tachininae		Ceromya	Ceromya bicolor		Jere Kahanpaa	jere.kahanpaa@helsinki.fi
MZH_HP.588	Arthropoda	Insecta	Diptera	Tachinidae	Tachininae		Loewia	Loewia erecta		J. Flinck	dipterabarcodes@luomus.fi
MZH_HP.589	Arthropoda	Insecta	Diptera	Tachinidae	Tachininae		Hyalurgus	Hyalurgus lucidus		Antti Haarto	ahaarto@gmail.com
MZH_HP.590	Arthropoda	Insecta	Diptera	Tachinidae	Tachininae		Hyalurgus	Hyalurgus crucigerus		Antti Haarto	ahaarto@gmail.com
MZH_HP.591	Arthropoda	Insecta	Diptera	Tachinidae	Tachininae		Hyalurgus	Hyalurgus crucigerus		Antti Haarto	ahaarto@gmail.com
MZH_HP.592	Arthropoda	Insecta	Diptera	Tachinidae	Exoristinae		Exorista	Exorista rustica		J. Flinck	dipterabarcodes@luomus.fi
MZH_HP.593	Arthropoda	Insecta	Diptera	Tachinidae	Exoristinae		Exorista	Exorista rustica		J. Flinck	dipterabarcodes@luomus.fi
MZH_HP.751	Arthropoda	Insecta	Diptera	Tachinidae	Tachininae		Pelatachina	Pelatachina tibialis		J. Flinck	dipterabarcodes@luomus.fi
MZH_HP.818	Arthropoda	Insecta	Diptera	Tachinidae	Tachininae		Dexiosoma	Dexiosoma caninum		J. Flinck	dipterabarcodes@luomus.fi
MZH_HP.925	Arthropoda	Insecta	Diptera	Tachinidae	Tachininae		Zophomyia	Zophomyia temula		J. Flinck	dipterabarcodes@luomus.fi
JP00201	Arthropoda	Insecta	Diptera	Tachinidae	Tachininae		Tachina	Tachina fera		Jaakko L.O. Pohjoismaeki	jaakkop@uef.fi
JP00202	Arthropoda	Insecta	Diptera	Tachinidae	Tachininae		Tachina	Tachina grossa		Jaakko L.O. Pohjoismaeki	jaakkop@uef.fi
JP00203	Arthropoda	Insecta	Diptera	Tachinidae	Tachininae		Tachina	Tachina magnicornis		Jaakko L.O. Pohjoismaeki	jaakkop@uef.fi
JP00204	Arthropoda	Insecta	Diptera	Tachinidae	Tachininae		Tachina	Tachina fera		Jaakko L.O. Pohjoismaeki	jaakkop@uef.fi
JP00205	Arthropoda	Insecta	Diptera	Tachinidae	Tachininae		Tachina	Tachina ursina		Jaakko L.O. Pohjoismaeki	jaakkop@uef.fi
JP00206	Arthropoda	Insecta	Diptera	Tachinidae	Tachininae		Tachina	Tachina canariensis		Jaakko L.O. Pohjoismaeki	jaakkop@uef.fi
JP00207	Arthropoda	Insecta	Diptera	Tachinidae	Tachininae		Tachina	Tachina lurida		Jaakko L.O. Pohjoismaeki	jaakkop@uef.fi
JP00208	Arthropoda	Insecta	Diptera	Tachinidae	Tachininae		Nowickia	Nowickia alpina		Jaakko L.O. Pohjoismaeki	jaakkop@uef.fi
JP00209	Arthropoda	Insecta	Diptera	Tachinidae	Tachininae		Nowickia	Nowickia marklini		Jaakko L.O. Pohjoismaeki	jaakkop@uef.fi
JP00210	Arthropoda	Insecta	Diptera	Tachinidae	Tachininae		Peleteria	Peleteria prompta		Jaakko L.O. Pohjoismaeki	jaakkop@uef.fi
JP00211	Arthropoda	Insecta	Diptera	Tachinidae	Tachininae		Peleteria	Peleteria rubescens		Jaakko L.O. Pohjoismaeki	jaakkop@uef.fi
JP00212	Arthropoda	Insecta	Diptera	Tachinidae	Tachininae		Peleteria	Peleteria ruficornis		Jaakko L.O. Pohjoismaeki	jaakkop@uef.fi
JP00213	Arthropoda	Insecta	Diptera	Tachinidae	Tachininae		Linnaemya	Linnaemya picta		Jaakko L.O. Pohjoismaeki	jaakkop@uef.fi
JP00214	Arthropoda	Insecta	Diptera	Tachinidae	Tachininae		Linnaemya	Linnaemya tessellans		Jaakko L.O. Pohjoismaeki	jaakkop@uef.fi
JP00215	Arthropoda	Insecta	Diptera	Tachinidae	Tachininae		Linnaemya	Linnaemya vulpina		Jaakko L.O. Pohjoismaeki	jaakkop@uef.fi
JP00216	Arthropoda	Insecta	Diptera	Tachinidae	Tachininae		Chrysosomopsis	Chrysosomopsis aurata		Jaakko L.O. Pohjoismaeki	jaakkop@uef.fi
JP00217	Arthropoda	Insecta	Diptera	Tachinidae	Tachininae		Lydina	Lydina aenea		Jaakko L.O. Pohjoismaeki	jaakkop@uef.fi
JP00218	Arthropoda	Insecta	Diptera	Tachinidae	Tachininae		Lypha	Lypha dubia		Jaakko L.O. Pohjoismaeki	jaakkop@uef.fi
JP00219	Arthropoda	Insecta	Diptera	Tachinidae	Tachininae		Lypha	Lypha ruficauda		Jaakko L.O. Pohjoismaeki	jaakkop@uef.fi
JP00220	Arthropoda	Insecta	Diptera	Tachinidae	Tachininae		Panzeria	Panzeria rudis		Jaakko L.O. Pohjoismaeki	jaakkop@uef.fi
JP00221	Arthropoda	Insecta	Diptera	Tachinidae	Tachininae		Panzeria	Panzeria puparum		Jaakko L.O. Pohjoismaeki	jaakkop@uef.fi
JP00222	Arthropoda	Insecta	Diptera	Tachinidae	Tachininae		Panzeria	Panzeria vagans		Jaakko L.O. Pohjoismaeki	jaakkop@uef.fi
JP00223	Arthropoda	Insecta	Diptera	Tachinidae	Tachininae		Appendicia	Appendicia truncata		Jaakko L.O. Pohjoismaeki	jaakkop@uef.fi
JP00224	Arthropoda	Insecta	Diptera	Tachinidae	Tachininae		Eurithia	Eurithia anthophila		Jaakko L.O. Pohjoismaeki	jaakkop@uef.fi
JP00225	Arthropoda	Insecta	Diptera	Tachinidae	Tachininae		Eurithia	Eurithia connivens		Jaakko L.O. Pohjoismaeki	jaakkop@uef.fi
JP00226	Arthropoda	Insecta	Diptera	Tachinidae	Tachininae		Eurithia	Eurithia connivens		Jaakko L.O. Pohjoismaeki	jaakkop@uef.fi
JP00227	Arthropoda	Insecta	Diptera	Tachinidae	Tachininae		Hyalurgus	Hyalurgus crucigerus		Jaakko L.O. Pohjoismaeki	jaakkop@uef.fi
JP00228	Arthropoda	Insecta	Diptera	Tachinidae	Tachininae		Hyalurgus	Hyalurgus lucidus		Jaakko L.O. Pohjoismaeki	jaakkop@uef.fi
JP00229	Arthropoda	Insecta	Diptera	Tachinidae	Tachininae		Gymnocheta	Gymnocheta magna		Jaakko L.O. Pohjoismaeki	jaakkop@uef.fi
JP00230	Arthropoda	Insecta	Diptera	Tachinidae	Tachininae		Gymnocheta	Gymnocheta viridis		Jaakko L.O. Pohjoismaeki	jaakkop@uef.fi
JP00231	Arthropoda	Insecta	Diptera	Tachinidae	Tachininae		Zophomyia	Zophomyia temula		Jaakko L.O. Pohjoismaeki	jaakkop@uef.fi
JP00232	Arthropoda	Insecta	Diptera	Tachinidae	Tachininae		Cleonice	Cleonice callida		Jaakko L.O. Pohjoismaeki	jaakkop@uef.fi
JP00233	Arthropoda	Insecta	Diptera	Tachinidae	Tachininae		Loewia	Loewia foeda		Jaakko L.O. Pohjoismaeki	jaakkop@uef.fi
JP00234	Arthropoda	Insecta	Diptera	Tachinidae	Tachininae		Loewia	Loewia erecta		Jaakko L.O. Pohjoismaeki	jaakkop@uef.fi
JP00235	Arthropoda	Insecta	Diptera	Tachinidae	Tachininae		Loewia	Loewia brevifrons		Jaakko L.O. Pohjoismaeki	jaakkop@uef.fi
JP00236	Arthropoda	Insecta	Diptera	Tachinidae	Tachininae		Loewia	Loewia phaeoptera		Jaakko L.O. Pohjoismaeki	jaakkop@uef.fi
JP00237	Arthropoda	Insecta	Diptera	Tachinidae	Tachininae		Loewia	Loewia submetallica		Jaakko L.O. Pohjoismaeki	jaakkop@uef.fi
JP00238	Arthropoda	Insecta	Diptera	Tachinidae	Tachininae		Loewia	Loewia nudigena		Jaakko L.O. Pohjoismaeki	jaakkop@uef.fi
JP00239	Arthropoda	Insecta	Diptera	Tachinidae	Tachininae		Eloceria	Eloceria delecta		Jaakko L.O. Pohjoismaeki	jaakkop@uef.fi
JP00240	Arthropoda	Insecta	Diptera	Tachinidae	Tachininae		Pseudopachystylum	Pseudopachystylum gonioides		Jaakko L.O. Pohjoismaeki	jaakkop@uef.fi
JP00241	Arthropoda	Insecta	Diptera	Tachinidae	Tachininae		Pelatachina	Pelatachina tibialis		Jaakko L.O. Pohjoismaeki	jaakkop@uef.fi
JP00242	Arthropoda	Insecta	Diptera	Tachinidae	Tachininae		Macquartia	Macquartia dispar		Jaakko L.O. Pohjoismaeki	jaakkop@uef.fi
JP00243	Arthropoda	Insecta	Diptera	Tachinidae	Tachininae		Macquartia	Macquartia nudigena		Jaakko L.O. Pohjoismaeki	jaakkop@uef.fi
JP00244	Arthropoda	Insecta	Diptera	Tachinidae	Tachininae		Macquartia	Macquartia nudigena		Jaakko L.O. Pohjoismaeki	jaakkop@uef.fi
JP00245	Arthropoda	Insecta	Diptera	Tachinidae	Tachininae		Triarthria	Triarthria setipennis		Jaakko L.O. Pohjoismaeki	jaakkop@uef.fi
JP00246	Arthropoda	Insecta	Diptera	Tachinidae	Tachininae		Triarthria	Triarthria setipennis		Jaakko L.O. Pohjoismaeki	jaakkop@uef.fi		f. spinipennis
JP00247	Arthropoda	Insecta	Diptera	Tachinidae	Tachininae		Phytomyptera	Phytomyptera bohemica		Jaakko L.O. Pohjoismaeki	jaakkop@uef.fi
JP00248	Arthropoda	Insecta	Diptera	Tachinidae	Tachininae		Phytomyptera	Phytomyptera cingulata		Jaakko L.O. Pohjoismaeki	jaakkop@uef.fi
JP00249	Arthropoda	Insecta	Diptera	Tachinidae	Tachininae		Phytomyptera	Phytomyptera minutissima		Jaakko L.O. Pohjoismaeki	jaakkop@uef.fi
JP00250	Arthropoda	Insecta	Diptera	Tachinidae	Tachininae		Phytomyptera	Phytomyptera zonella		Jaakko L.O. Pohjoismaeki	jaakkop@uef.fi
JP00251	Arthropoda	Insecta	Diptera	Tachinidae	Tachininae		Graphogaster	Graphogaster buccata		Jaakko L.O. Pohjoismaeki	jaakkop@uef.fi
JP00252	Arthropoda	Insecta	Diptera	Tachinidae	Tachininae		Graphogaster	Graphogaster brunnescens		Jaakko L.O. Pohjoismaeki	jaakkop@uef.fi
JP00253	Arthropoda	Insecta	Diptera	Tachinidae	Tachininae		Ceranthia	Ceranthia abdominalis		Jaakko L.O. Pohjoismaeki	jaakkop@uef.fi
JP00254	Arthropoda	Insecta	Diptera	Tachinidae	Tachininae		Ceromya	Ceromya bicolor		Jaakko L.O. Pohjoismaeki	jaakkop@uef.fi
JP00255	Arthropoda	Insecta	Diptera	Tachinidae	Dexiinae		Microsoma	Microsoma exiguum		Jaakko L.O. Pohjoismaeki	jaakkop@uef.fi
JP00256	Arthropoda	Insecta	Diptera	Tachinidae	Tachininae		Actia	Actia crassicornis		Jaakko L.O. Pohjoismaeki	jaakkop@uef.fi
JP00257	Arthropoda	Insecta	Diptera	Tachinidae	Tachininae		Actia	Actia lamia		Jaakko L.O. Pohjoismaeki	jaakkop@uef.fi
JP00258	Arthropoda	Insecta	Diptera	Tachinidae	Tachininae		Actia	Actia nigroscutellata		Jaakko L.O. Pohjoismaeki	jaakkop@uef.fi
JP00259	Arthropoda	Insecta	Diptera	Tachinidae	Tachininae		Actia	Actia pilipennis		Jaakko L.O. Pohjoismaeki	jaakkop@uef.fi
JP00260	Arthropoda	Insecta	Diptera	Tachinidae	Tachininae		Actia	Actia resinellae		Jaakko L.O. Pohjoismaeki	jaakkop@uef.fi
JP00261	Arthropoda	Insecta	Diptera	Tachinidae	Tachininae		Peribaea	Peribaea hertingi		Jaakko L.O. Pohjoismaeki	jaakkop@uef.fi
JP00262	Arthropoda	Insecta	Diptera	Tachinidae	Tachininae		Peribaea	Peribaea tibialis		Jaakko L.O. Pohjoismaeki	jaakkop@uef.fi
JP00263	Arthropoda	Insecta	Diptera	Tachinidae	Tachininae		Ceranthia	Ceranthia abdominalis		Jaakko L.O. Pohjoismaeki	jaakkop@uef.fi
JP00264	Arthropoda	Insecta	Diptera	Tachinidae	Tachininae		Ceranthia	Ceranthia lichtwardtiana		Jaakko L.O. Pohjoismaeki	jaakkop@uef.fi
JP00265	Arthropoda	Insecta	Diptera	Tachinidae	Tachininae		Ceranthia	Ceranthia tenuipalpis		Jaakko L.O. Pohjoismaeki	jaakkop@uef.fi
JP00266	Arthropoda	Insecta	Diptera	Tachinidae	Tachininae		Aphantorhaphopsis	Aphantorhaphopsis samarensis		Jaakko L.O. Pohjoismaeki	jaakkop@uef.fi
JP00267	Arthropoda	Insecta	Diptera	Tachinidae	Tachininae		Aphantorhaphopsis	Aphantorhaphopsis siphonoides		Jaakko L.O. Pohjoismaeki	jaakkop@uef.fi
JP00268	Arthropoda	Insecta	Diptera	Tachinidae	Tachininae		Aphantorhaphopsis	Aphantorhaphopsis verralli		Jaakko L.O. Pohjoismaeki	jaakkop@uef.fi
JP00269	Arthropoda	Insecta	Diptera	Tachinidae	Tachininae		Siphona	Siphona boreata		Jaakko L.O. Pohjoismaeki	jaakkop@uef.fi
JP00270	Arthropoda	Insecta	Diptera	Tachinidae	Tachininae		Siphona	Siphona collini		Jaakko L.O. Pohjoismaeki	jaakkop@uef.fi
JP00271	Arthropoda	Insecta	Diptera	Tachinidae	Tachininae		Siphona	Siphona confusa		Jaakko L.O. Pohjoismaeki	jaakkop@uef.fi
JP00272	Arthropoda	Insecta	Diptera	Tachinidae	Tachininae		Siphona	Siphona flavifrons		Jaakko L.O. Pohjoismaeki	jaakkop@uef.fi
JP00273	Arthropoda	Insecta	Diptera	Tachinidae	Tachininae		Siphona	Siphona geniculata		Jaakko L.O. Pohjoismaeki	jaakkop@uef.fi
JP00274	Arthropoda	Insecta	Diptera	Tachinidae	Tachininae		Siphona	Siphona ingerae		Jaakko L.O. Pohjoismaeki	jaakkop@uef.fi
JP00275	Arthropoda	Insecta	Diptera	Tachinidae	Tachininae		Siphona	Siphona paludosa		Jaakko L.O. Pohjoismaeki	jaakkop@uef.fi
JP00276	Arthropoda	Insecta	Diptera	Tachinidae	Tachininae		Siphona	Siphona maculata		Jaakko L.O. Pohjoismaeki	jaakkop@uef.fi
JP00277	Arthropoda	Insecta	Diptera	Tachinidae	Tachininae		Siphona	Siphona nigricans		Jaakko L.O. Pohjoismaeki	jaakkop@uef.fi
JP00278	Arthropoda	Insecta	Diptera	Tachinidae	Tachininae		Siphona	Siphona paludosa		Jaakko L.O. Pohjoismaeki	jaakkop@uef.fi
JP00279	Arthropoda	Insecta	Diptera	Tachinidae	Tachininae		Siphona	Siphona paludosa		Jaakko L.O. Pohjoismaeki	jaakkop@uef.fi
JP00280	Arthropoda	Insecta	Diptera	Tachinidae	Tachininae		Siphona	Siphona rossica		Jaakko L.O. Pohjoismaeki	jaakkop@uef.fi
JP00281	Arthropoda	Insecta	Diptera	Tachinidae	Tachininae		Siphona	Siphona setosa		Jaakko L.O. Pohjoismaeki	jaakkop@uef.fi
JP00282	Arthropoda	Insecta	Diptera	Tachinidae	Tachininae		Siphona	Siphona subarctica		Jaakko L.O. Pohjoismaeki	jaakkop@uef.fi
JP00283	Arthropoda	Insecta	Diptera	Tachinidae	Tachininae		Bithia	Bithia acanthophora		Jaakko L.O. Pohjoismaeki	jaakkop@uef.fi
JP00284	Arthropoda	Insecta	Diptera	Tachinidae	Tachininae		Bithia	Bithia spreta		Jaakko L.O. Pohjoismaeki	jaakkop@uef.fi
JP00285	Arthropoda	Insecta	Diptera	Tachinidae	Tachininae		Solieria	Solieria inanis		Jaakko L.O. Pohjoismaeki	jaakkop@uef.fi
JP00286	Arthropoda	Insecta	Diptera	Tachinidae	Tachininae		Microphthalma	Microphthalma europaea		Jaakko L.O. Pohjoismaeki	jaakkop@uef.fi
JP00287	Arthropoda	Insecta	Diptera	Tachinidae	Dexiinae		Estheria			Jaakko L.O. Pohjoismaeki	jaakkop@uef.fi		Estheria sp.
JP00288	Arthropoda	Insecta	Diptera	Tachinidae	Dexiinae		Billaea	Billaea pectinata		Jaakko L.O. Pohjoismaeki	jaakkop@uef.fi
JP00289	Arthropoda	Insecta	Diptera	Tachinidae	Dexiinae		Zeuxia	Zeuxia cinerea		Jaakko L.O. Pohjoismaeki	jaakkop@uef.fi
JP00290	Arthropoda	Insecta	Diptera	Tachinidae	Dexiinae		Blepharomyia	Blepharomyia angustifrons		Jaakko L.O. Pohjoismaeki	jaakkop@uef.fi
JP00291	Arthropoda	Insecta	Diptera	Tachinidae	Dexiinae		Kirbya	Kirbya moerens		Jaakko L.O. Pohjoismaeki	jaakkop@uef.fi
JP00292	Arthropoda	Insecta	Diptera	Tachinidae	Dexiinae		Athrycia	Athrycia curvinervis		Jaakko L.O. Pohjoismaeki	jaakkop@uef.fi
JP00293	Arthropoda	Insecta	Diptera	Tachinidae	Dexiinae		Athrycia	Athrycia impressa		Jaakko L.O. Pohjoismaeki	jaakkop@uef.fi
JP00294	Arthropoda	Insecta	Diptera	Tachinidae	Dexiinae		Athrycia	Athrycia trepida		Jaakko L.O. Pohjoismaeki	jaakkop@uef.fi
JP00295	Arthropoda	Insecta	Diptera	Tachinidae	Dexiinae		Microsoma	Microsoma exiguum		Jaakko L.O. Pohjoismaeki	jaakkop@uef.fi
MZH_GV.3522	Arthropoda	Insecta	Diptera	Tachinidae	Tachininae		Gymnocheta	Gymnocheta viridis		Jere Kahanpaa	jere.kahanpaa@helsinki.fi
MZH_GV.3524	Arthropoda	Insecta	Diptera	Tachinidae	Tachininae		Lypha	Lypha dubia		Jere Kahanpaa	jere.kahanpaa@helsinki.fi
MZH_GV.3529	Arthropoda	Insecta	Diptera	Tachinidae	Tachininae		Siphona	Siphona collini		Jere Kahanpaa	jere.kahanpaa@helsinki.fi
JP00101	Arthropoda	Insecta	Diptera	Tachinidae	Phasiinae		Clytiomya	Clytiomya continua		Jaakko L.O. Pohjoismaeki	jaakkop@uef.fi
JP00102	Arthropoda	Insecta	Diptera	Tachinidae	Phasiinae		Ectophasia	Ectophasia crassipennis		Jaakko L.O. Pohjoismaeki	jaakkop@uef.fi
JP00103	Arthropoda	Insecta	Diptera	Tachinidae	Phasiinae		Xysta	Xysta holosericea
JP00104	Arthropoda	Insecta	Diptera	Tachinidae	Phasiinae		Opesia	Opesia descendens		Jaakko L.O. Pohjoismaeki	jaakkop@uef.fi
JP00105	Arthropoda	Insecta	Diptera	Tachinidae	Phasiinae		Eulabidogaster	Eulabidogaster setifacies		Jaakko L.O. Pohjoismaeki	jaakkop@uef.fi
JP00106	Arthropoda	Insecta	Diptera	Tachinidae	Phasiinae		Leucostoma	Leucostoma meridianum		Jaakko L.O. Pohjoismaeki	jaakkop@uef.fi
JP00107	Arthropoda	Insecta	Diptera	Tachinidae	Phasiinae		Leucostoma	Leucostoma tetraptera		Jaakko L.O. Pohjoismaeki	jaakkop@uef.fi
JP00108	Arthropoda	Insecta	Diptera	Tachinidae	Phasiinae		Leucostoma	Leucostoma simplex		Jaakko L.O. Pohjoismaeki	jaakkop@uef.fi
JP00109	Arthropoda	Insecta	Diptera	Tachinidae	Phasiinae		Clairvillia	Clairvillia biguttata		Jaakko L.O. Pohjoismaeki	jaakkop@uef.fi
JP00110	Arthropoda	Insecta	Diptera	Tachinidae	Phasiinae		Phania	Phania funesta		Jaakko L.O. Pohjoismaeki	jaakkop@uef.fi
JP00111	Arthropoda	Insecta	Diptera	Tachinidae	Phasiinae		Cylindromyia	Cylindromyia rufifrons		Jaakko L.O. Pohjoismaeki	jaakkop@uef.fi
JP00112	Arthropoda	Insecta	Diptera	Tachinidae	Exoristinae		Exorista	Exorista larvarum		Jaakko L.O. Pohjoismaeki	jaakkop@uef.fi
JP00113	Arthropoda	Insecta	Diptera	Tachinidae	Exoristinae		Chetogena	Chetogena acuminata		Jaakko L.O. Pohjoismaeki	jaakkop@uef.fi
JP00114	Arthropoda	Insecta	Diptera	Tachinidae	Exoristinae		Parasetigena	Parasetigena silvestris		Jaakko L.O. Pohjoismaeki	jaakkop@uef.fi
JP00115	Arthropoda	Insecta	Diptera	Tachinidae	Exoristinae		Phorocera	Phorocera assimilis		Jaakko L.O. Pohjoismaeki	jaakkop@uef.fi
JP00116	Arthropoda	Insecta	Diptera	Tachinidae	Exoristinae		Phorocera	Phorocera grandis		Jaakko L.O. Pohjoismaeki	jaakkop@uef.fi
JP00117	Arthropoda	Insecta	Diptera	Tachinidae	Exoristinae		Gastrolepta	Gastrolepta anthracina		Jaakko L.O. Pohjoismaeki	jaakkop@uef.fi
JP00118	Arthropoda	Insecta	Diptera	Tachinidae	Exoristinae		Medina			Jaakko L.O. Pohjoismaeki	jaakkop@uef.fi		sp. nr. collaris
JP00119	Arthropoda	Insecta	Diptera	Tachinidae	Exoristinae		Medina	Medina separata		Jaakko L.O. Pohjoismaeki	jaakkop@uef.fi
JP00120	Arthropoda	Insecta	Diptera	Tachinidae	Exoristinae		Medina	Medina separata		Jaakko L.O. Pohjoismaeki	jaakkop@uef.fi
JP00121	Arthropoda	Insecta	Diptera	Tachinidae	Exoristinae		Ligeria	Ligeria angusticornis		Jaakko L.O. Pohjoismaeki	jaakkop@uef.fi
JP00122	Arthropoda	Insecta	Diptera	Tachinidae	Exoristinae		Blondelia	Blondelia nigripes		Jaakko L.O. Pohjoismaeki	jaakkop@uef.fi
JP00123	Arthropoda	Insecta	Diptera	Tachinidae	Tachininae		Acemya	Acemya rufitibia		Jaakko L.O. Pohjoismaeki	jaakkop@uef.fi
JP00124	Arthropoda	Insecta	Diptera	Tachinidae	Exoristinae		Paratryphera	Paratryphera barbatula		Jaakko L.O. Pohjoismaeki	jaakkop@uef.fi
JP00125	Arthropoda	Insecta	Diptera	Tachinidae	Exoristinae		Rhaphiochaeta	Rhaphiochaeta breviseta		Jaakko L.O. Pohjoismaeki	jaakkop@uef.fi
JP00126	Arthropoda	Insecta	Diptera	Tachinidae	Exoristinae		Smidtia	Smidtia amoena		Jaakko L.O. Pohjoismaeki	jaakkop@uef.fi
JP00127	Arthropoda	Insecta	Diptera	Tachinidae	Exoristinae		Winthemia	Winthemia quadripustulata		Jaakko L.O. Pohjoismaeki	jaakkop@uef.fi
JP00128	Arthropoda	Insecta	Diptera	Tachinidae	Exoristinae		Winthemia	Winthemia speciosa		Jaakko L.O. Pohjoismaeki	jaakkop@uef.fi
JP00129	Arthropoda	Insecta	Diptera	Tachinidae	Exoristinae		Nemorilla	Nemorilla floralis		Jaakko L.O. Pohjoismaeki	jaakkop@uef.fi
JP00130	Arthropoda	Insecta	Diptera	Tachinidae	Exoristinae		Nemorilla	Nemorilla maculosa		Jaakko L.O. Pohjoismaeki	jaakkop@uef.fi
JP00131	Arthropoda	Insecta	Diptera	Tachinidae	Exoristinae		Aplomya	Aplomya confinis		Jaakko L.O. Pohjoismaeki	jaakkop@uef.fi
JP00132	Arthropoda	Insecta	Diptera	Tachinidae	Exoristinae		Phebellia	Phebellia glauca		Jaakko L.O. Pohjoismaeki	jaakkop@uef.fi
JP00133	Arthropoda	Insecta	Diptera	Tachinidae	Exoristinae		Hubneria	Hubneria affinis		Jaakko L.O. Pohjoismaeki	jaakkop@uef.fi		Previous ID: Huebneria affinis
JP00134	Arthropoda	Insecta	Diptera	Tachinidae	Exoristinae		Phebellia	Phebellia nigripalpis		Christer Bergstroem
JP00135	Arthropoda	Insecta	Diptera	Tachinidae	Exoristinae		Phebellia	Phebellia stulta		Jaakko L.O. Pohjoismaeki	jaakkop@uef.fi
JP00136	Arthropoda	Insecta	Diptera	Tachinidae	Exoristinae		Hubneria	Hubneria affinis		Jaakko L.O. Pohjoismaeki	jaakkop@uef.fi		Previous ID: Huebneria affinis
JP00137	Arthropoda	Insecta	Diptera	Tachinidae	Exoristinae		Phebellia	Phebellia stulta		Jaakko L.O. Pohjoismaeki	jaakkop@uef.fi
JP00138	Arthropoda	Insecta	Diptera	Tachinidae	Exoristinae		Nilea	Nilea hortulana		Jaakko L.O. Pohjoismaeki	jaakkop@uef.fi
JP00139	Arthropoda	Insecta	Diptera	Tachinidae	Exoristinae		Phryxe	Phryxe erythrostoma		Jaakko L.O. Pohjoismaeki	jaakkop@uef.fi
JP00140	Arthropoda	Insecta	Diptera	Tachinidae	Exoristinae		Pales	Pales pavida		Jaakko L.O. Pohjoismaeki	jaakkop@uef.fi
JP00141	Arthropoda	Insecta	Diptera	Tachinidae	Exoristinae		Tlephusa	Tlephusa cincinna		Jaakko L.O. Pohjoismaeki	jaakkop@uef.fi
JP00142	Arthropoda	Insecta	Diptera	Tachinidae	Exoristinae		Epicampocera	Epicampocera succincta		Jaakko L.O. Pohjoismaeki	jaakkop@uef.fi
JP00143	Arthropoda	Insecta	Diptera	Tachinidae	Exoristinae		Phryxe	Phryxe vulgaris		Jaakko L.O. Pohjoismaeki	jaakkop@uef.fi
JP00144	Arthropoda	Insecta	Diptera	Tachinidae	Exoristinae		Phryxe	Phryxe heraclei		Jaakko L.O. Pohjoismaeki	jaakkop@uef.fi
JP00145	Arthropoda	Insecta	Diptera	Tachinidae	Exoristinae		Phryxe	Phryxe vulgaris		Jaakko L.O. Pohjoismaeki	jaakkop@uef.fi
JP00146	Arthropoda	Insecta	Diptera	Tachinidae	Exoristinae		Bactromyia	Bactromyia aurulenta		Jaakko L.O. Pohjoismaeki	jaakkop@uef.fi
JP00147	Arthropoda	Insecta	Diptera	Tachinidae	Exoristinae		Pseudoperichaeta	Pseudoperichaeta nigrolineata		Jaakko L.O. Pohjoismaeki	jaakkop@uef.fi
JP00148	Arthropoda	Insecta	Diptera	Tachinidae	Exoristinae		Pales	Pales pavida
JP00149	Arthropoda	Insecta	Diptera	Tachinidae	Exoristinae		Lydella	Lydella ripae		Jaakko L.O. Pohjoismaeki	jaakkop@uef.fi
JP00150	Arthropoda	Insecta	Diptera	Tachinidae	Exoristinae		Lydella	Lydella stabulans		Jaakko L.O. Pohjoismaeki	jaakkop@uef.fi
JP00151	Arthropoda	Insecta	Diptera	Tachinidae	Exoristinae		Chetina	Chetina setigena		Jaakko L.O. Pohjoismaeki	jaakkop@uef.fi
JP00152	Arthropoda	Insecta	Diptera	Tachinidae	Exoristinae		Cadurciella	Cadurciella tritaeniata		Jaakko L.O. Pohjoismaeki	jaakkop@uef.fi
JP00153	Arthropoda	Insecta	Diptera	Tachinidae	Exoristinae		Drino	Drino galii		Jaakko L.O. Pohjoismaeki	jaakkop@uef.fi
JP00154	Arthropoda	Insecta	Diptera	Tachinidae	Exoristinae		Drino	Drino inconspicua		Christer Bergstroem
JP00155	Arthropoda	Insecta	Diptera	Tachinidae	Exoristinae		Drino	Drino lota		Jaakko L.O. Pohjoismaeki	jaakkop@uef.fi
JP00156	Arthropoda	Insecta	Diptera	Tachinidae	Exoristinae		Drino	Drino vicina		Jaakko L.O. Pohjoismaeki	jaakkop@uef.fi		Drino vicina
JP00157	Arthropoda	Insecta	Diptera	Tachinidae	Exoristinae		Hubneria	Hubneria affinis		Jaakko L.O. Pohjoismaeki	jaakkop@uef.fi		Previous ID: Huebneria affinis
JP00158	Arthropoda	Insecta	Diptera	Tachinidae	Exoristinae		Carcelia	Carcelia atricosta		Jaakko L.O. Pohjoismaeki	jaakkop@uef.fi
JP00159	Arthropoda	Insecta	Diptera	Tachinidae	Exoristinae		Carcelia	Carcelia iliaca
JP00160	Arthropoda	Insecta	Diptera	Tachinidae	Exoristinae		Carcelia	Carcelia laxifrons		Jaakko L.O. Pohjoismaeki	jaakkop@uef.fi
JP00161	Arthropoda	Insecta	Diptera	Tachinidae	Exoristinae		Carcelia	Carcelia lucorum		Jaakko L.O. Pohjoismaeki	jaakkop@uef.fi
JP00162	Arthropoda	Insecta	Diptera	Tachinidae	Exoristinae		Carcelia	Carcelia rasa		Jaakko L.O. Pohjoismaeki	jaakkop@uef.fi
JP00163	Arthropoda	Insecta	Diptera	Tachinidae	Exoristinae		Senometopia	Senometopia excisa		Jaakko L.O. Pohjoismaeki	jaakkop@uef.fi
JP00164	Arthropoda	Insecta	Diptera	Tachinidae	Exoristinae		Senometopia	Senometopia pollinosa		Jaakko L.O. Pohjoismaeki	jaakkop@uef.fi
JP00165	Arthropoda	Insecta	Diptera	Tachinidae	Exoristinae		Senometopia	Senometopia separata		Jaakko L.O. Pohjoismaeki	jaakkop@uef.fi
JP00166	Arthropoda	Insecta	Diptera	Tachinidae	Exoristinae		Erycia	Erycia furibunda		Jaakko L.O. Pohjoismaeki	jaakkop@uef.fi
JP00167	Arthropoda	Insecta	Diptera	Tachinidae	Exoristinae		Carcelia	Carcelia iliaca
JP00168	Arthropoda	Insecta	Diptera	Tachinidae	Exoristinae		Xylotachina	Xylotachina diluta		Jaakko L.O. Pohjoismaeki	jaakkop@uef.fi
JP00169	Arthropoda	Insecta	Diptera	Tachinidae	Exoristinae		Alsomyia	Alsomyia capillata		Jaakko L.O. Pohjoismaeki	jaakkop@uef.fi
JP00170	Arthropoda	Insecta	Diptera	Tachinidae	Exoristinae		Platymya	Platymya fimbriata		Jaakko L.O. Pohjoismaeki	jaakkop@uef.fi
JP00171	Arthropoda	Insecta	Diptera	Tachinidae	Exoristinae		Eumea	Eumea linearicornis		Jaakko L.O. Pohjoismaeki	jaakkop@uef.fi
JP00172	Arthropoda	Insecta	Diptera	Tachinidae	Exoristinae		Eumea	Eumea mitis		Jaakko L.O. Pohjoismaeki	jaakkop@uef.fi
JP00173	Arthropoda	Insecta	Diptera	Tachinidae	Exoristinae		Myxexoristops	Myxexoristops blondeli		Jaakko L.O. Pohjoismaeki	jaakkop@uef.fi
JP00174	Arthropoda	Insecta	Diptera	Tachinidae	Exoristinae		Myxexoristops	Myxexoristops stolida		Jaakko L.O. Pohjoismaeki	jaakkop@uef.fi
JP00175	Arthropoda	Insecta	Diptera	Tachinidae	Exoristinae		Clemelis	Clemelis pullata		Jaakko L.O. Pohjoismaeki	jaakkop@uef.fi
JP00176	Arthropoda	Insecta	Diptera	Tachinidae	Exoristinae		Zenillia	Zenillia libatrix		Jaakko L.O. Pohjoismaeki	jaakkop@uef.fi
JP00177	Arthropoda	Insecta	Diptera	Tachinidae	Exoristinae		Pales	Pales pavida		Jaakko L.O. Pohjoismaeki	jaakkop@uef.fi
JP00178	Arthropoda	Insecta	Diptera	Tachinidae	Exoristinae		Pales	Pales peregrina		Jaakko L.O. Pohjoismaeki	jaakkop@uef.fi
JP00179	Arthropoda	Insecta	Diptera	Tachinidae	Exoristinae		Cyzenis	Cyzenis albicans		Jaakko L.O. Pohjoismaeki	jaakkop@uef.fi
JP00180	Arthropoda	Insecta	Diptera	Tachinidae	Exoristinae		Cyzenis	Cyzenis jucunda		Jaakko L.O. Pohjoismaeki	jaakkop@uef.fi
JP00181	Arthropoda	Insecta	Diptera	Tachinidae	Exoristinae		Botria	Botria subalpina		Jaakko L.O. Pohjoismaeki	jaakkop@uef.fi
JP00182	Arthropoda	Insecta	Diptera	Tachinidae	Exoristinae		Bothria	Bothria frontosa		Christer Bergstroem
JP00183	Arthropoda	Insecta	Diptera	Tachinidae	Exoristinae		Allophorocera	Allophorocera ferruginea		Jaakko L.O. Pohjoismaeki	jaakkop@uef.fi
JP00184	Arthropoda	Insecta	Diptera	Tachinidae	Exoristinae		Ocytata	Ocytata pallipes		Jaakko L.O. Pohjoismaeki	jaakkop@uef.fi
JP00185	Arthropoda	Insecta	Diptera	Tachinidae	Exoristinae		Elodia	Elodia ambulatoria		Jaakko L.O. Pohjoismaeki	jaakkop@uef.fi
JP00186	Arthropoda	Insecta	Diptera	Tachinidae	Exoristinae		Blepharipa	Blepharipa pratensis		Jaakko L.O. Pohjoismaeki	jaakkop@uef.fi
JP00187	Arthropoda	Insecta	Diptera	Tachinidae	Exoristinae		Masicera	Masicera pavoniae		Jaakko L.O. Pohjoismaeki	jaakkop@uef.fi
JP00188	Arthropoda	Insecta	Diptera	Tachinidae	Exoristinae		Prosopea	Prosopea nigricans		Jaakko L.O. Pohjoismaeki	jaakkop@uef.fi
JP00189	Arthropoda	Insecta	Diptera	Tachinidae	Exoristinae		Frontina	Frontina laeta		Jaakko L.O. Pohjoismaeki	jaakkop@uef.fi
JP00190	Arthropoda	Insecta	Diptera	Tachinidae	Exoristinae		Brachicheta	Brachicheta strigata		Jaakko L.O. Pohjoismaeki	jaakkop@uef.fi
JP00191	Arthropoda	Insecta	Diptera	Tachinidae	Exoristinae		Gonia	Gonia bimaculata
JP00192	Arthropoda	Insecta	Diptera	Tachinidae	Exoristinae		Gonia	Gonia ornata		Jaakko L.O. Pohjoismaeki	jaakkop@uef.fi
JP00193	Arthropoda	Insecta	Diptera	Tachinidae	Exoristinae		Gonia	Gonia divisa		Jaakko L.O. Pohjoismaeki	jaakkop@uef.fi
JP00194	Arthropoda	Insecta	Diptera	Tachinidae	Exoristinae		Gonia	Gonia picea		Jaakko L.O. Pohjoismaeki	jaakkop@uef.fi
JP00195	Arthropoda	Insecta	Diptera	Tachinidae	Exoristinae		Onychogonia	Onychogonia flaviceps		Jaakko L.O. Pohjoismaeki	jaakkop@uef.fi
jka11-01724	Arthropoda	Insecta	Diptera	Tachinidae	Exoristinae		Oswaldia	Oswaldia muscaria		Jere Kahanpaa	jere.kahanpaa@helsinki.fi
jka11-00489	Arthropoda	Insecta	Diptera	Tachinidae	Phasiinae		Cylindromyia	Cylindromyia brassicaria		Jere Kahanpaa	jere.kahanpaa@helsinki.fi
jka11-01645	Arthropoda	Insecta	Diptera	Tachinidae	Tachininae		Solieria	Solieria pacifica		Jere Kahanpaa	jere.kahanpaa@helsinki.fi
jka11-00705	Arthropoda	Insecta	Diptera	Tachinidae	Exoristinae		Drino	Drino lota		Jere Kahanpaa	jere.kahanpaa@helsinki.fi
jka11-00770	Arthropoda	Insecta	Diptera	Tachinidae	Tachininae		Loewia	Loewia erecta		Jere Kahanpaa	jere.kahanpaa@helsinki.fi
jka11-00839	Arthropoda	Insecta	Diptera	Tachinidae	Tachininae		Actia	Actia maksymovi		Jere Kahanpaa	jere.kahanpaa@helsinki.fi
jka11-00898	Arthropoda	Insecta	Diptera	Tachinidae	Phasiinae		Phania	Phania funesta		Jere Kahanpaa	jere.kahanpaa@helsinki.fi
jka11-00903	Arthropoda	Insecta	Diptera	Tachinidae	Exoristinae		Zaira	Zaira cinerea		Jere Kahanpaa	jere.kahanpaa@helsinki.fi
jka11-00899	Arthropoda	Insecta	Diptera	Tachinidae	Phasiinae		Cistogaster	Cistogaster globosa		Jere Kahanpaa	jere.kahanpaa@helsinki.fi
jka11-00965	Arthropoda	Insecta	Diptera	Tachinidae	Dexiinae		Thelaira	Thelaira nigrina		Jere Kahanpaa	jere.kahanpaa@helsinki.fi
jka11-01060	Arthropoda	Insecta	Diptera	Tachinidae	Phasiinae		Cylindromyia	Cylindromyia interrupta		Jere Kahanpaa	jere.kahanpaa@helsinki.fi
jka11-01055	Arthropoda	Insecta	Diptera	Tachinidae	Phasiinae		Cylindromyia	Cylindromyia pusilla		Jere Kahanpaa	jere.kahanpaa@helsinki.fi
JP00301	Arthropoda	Insecta	Diptera	Tachinidae	Exoristinae		Exorista	Exorista fasciata		Jaakko L.O. Pohjoismaeki	jaakkop@uef.fi
JP00302	Arthropoda	Insecta	Diptera	Tachinidae	Phasiinae		Brullaea	Brullaea ocypteroidea		J. Ziegler
JP00303	Arthropoda	Insecta	Diptera	Tachinidae	Exoristinae		Chetogena	Chetogena tschorsnigi		J. Ziegler
JP00304	Arthropoda	Insecta	Diptera	Tachinidae	Exoristinae		Clemelis	Clemelis pullata		J. Ziegler
JP00305	Arthropoda	Insecta	Diptera	Tachinidae	Exoristinae		Gonia	Gonia capitata		J. Ziegler
JP00306	Arthropoda	Insecta	Diptera	Tachinidae	Exoristinae		Masicera	Masicera silvatica		J. Ziegler
JP00307	Arthropoda	Insecta	Diptera	Tachinidae	Exoristinae		Oswaldia	Oswaldia reducta		J. Ziegler
JP00308	Arthropoda	Insecta	Diptera	Tachinidae	Exoristinae		Periarchiclops	Periarchiclops scutellaris		J. Ziegler
JP00309	Arthropoda	Insecta	Diptera	Tachinidae	Exoristinae		Phryxe	Phryxe nemea		J. Ziegler
JP00310	Arthropoda	Insecta	Diptera	Tachinidae	Goniinae		Pseudoperichaeta	Pseudoperichaeta palesoidea		J. Ziegler
JP00311	Arthropoda	Insecta	Diptera	Tachinidae	Exoristinae		Smidtia	Smidtia conspersa		J. Ziegler
JP00312	Arthropoda	Insecta	Diptera	Tachinidae	Exoristinae		Spallanzania	Spallanzania hebes		J. Ziegler
JP00313	Arthropoda	Insecta	Diptera	Tachinidae	Exoristinae		Spallanzania	Spallanzania hebes		J. Ziegler
JP00314	Arthropoda	Insecta	Diptera	Tachinidae	Exoristinae		Sturmia	Sturmia bella		J. Ziegler
JP00315	Arthropoda	Insecta	Diptera	Tachinidae	Tachininae		Eurithia	Eurithia caesia		J. Ziegler
JP00316	Arthropoda	Insecta	Diptera	Tachinidae	Tachininae		Eurithia	Eurithia vivida		J. Ziegler
JP00317	Arthropoda	Insecta	Diptera	Tachinidae	Tachininae		Germaria	Germaria angustata		J. Ziegler
JP00318	Arthropoda	Insecta	Diptera	Tachinidae	Tachininae		Nemoraea	Nemoraea pellucida		J. Ziegler
JP00319	Arthropoda	Insecta	Diptera	Tachinidae	Tachininae		Nowickia	Nowickia ferox		J. Ziegler
JP00320	Arthropoda	Insecta	Diptera	Tachinidae	Tachininae		Nowickia	Nowickia ferox		T. Zeegers
JP00321	Arthropoda	Insecta	Diptera	Tachinidae	Tachininae		Peleteria	Peleteria rubescens		J. Ziegler
JP00322	Arthropoda	Insecta	Diptera	Tachinidae	Tachininae		Siphona	Siphona grandistyla		J. Ziegler
JP00323	Arthropoda	Insecta	Diptera	Tachinidae	Dexiinae		Dexia	Dexia rustica		J. Ziegler
JP00324	Arthropoda	Insecta	Diptera	Tachinidae	Dexiinae		Eriothrix	Eriothrix argyreatus		J. Ziegler
JP00325	Arthropoda	Insecta	Diptera	Tachinidae	Dexiinae		Eriothrix	Eriothrix rufomaculatus		Jaakko L.O. Pohjoismaeki	jaakkop@uef.fi
JP00326	Arthropoda	Insecta	Diptera	Tachinidae	Dexiinae		Estheria	Estheria petiolata		J. Ziegler
JP00327	Arthropoda	Insecta	Diptera	Tachinidae	Dexiinae		Periscepsia	Periscepsia carbonaria		J. Ziegler
JP00328	Arthropoda	Insecta	Diptera	Tachinidae	Tachininae		Therobia	Therobia leonidei		Jaakko L.O. Pohjoismaeki	jaakkop@uef.fi
JP00329	Arthropoda	Insecta	Diptera	Tachinidae	Tachininae		Therobia	Therobia leonidei		Jaakko L.O. Pohjoismaeki	jaakkop@uef.fi
JP00330	Arthropoda	Insecta	Diptera	Tachinidae	Exoristinae		Phryxe	Phryxe magnicornis		Jaakko L.O. Pohjoismaeki	jaakkop@uef.fi
JP00331	Arthropoda	Insecta	Diptera	Tachinidae	Phasiinae		Cinochira	Cinochira atra		T. Zeegers
JP00332	Arthropoda	Insecta	Diptera	Tachinidae	Phasiinae		Gymnosoma	Gymnosoma clavatum		T. Zeegers
JP00333	Arthropoda	Insecta	Diptera	Tachinidae	Phasiinae		Gymnosoma	Gymnosoma clavatum		T. Zeegers
JP00334	Arthropoda	Insecta	Diptera	Tachinidae	Phasiinae		Gymnosoma	Gymnosoma nudifrons		T. Zeegers
JP00335	Arthropoda	Insecta	Diptera	Tachinidae	Phasiinae		Gymnosoma	Gymnosoma nudifrons		T. Zeegers
JP00336	Arthropoda	Insecta	Diptera	Tachinidae	Phasiinae		Gymnosoma	Gymnosoma rotundatum		T. Zeegers
JP00337	Arthropoda	Insecta	Diptera	Tachinidae	Phasiinae		Gymnosoma	Gymnosoma rotundatum		T. Zeegers
JP00338	Arthropoda	Insecta	Diptera	Tachinidae	Phasiinae		Gymnosoma	Gymnosoma nr. Costatum		T. Zeegers
JP00339	Arthropoda	Insecta	Diptera	Tachinidae	Tachininae		Graphogaster	Graphogaster vestita		T. Zeegers
JP00340	Arthropoda	Insecta	Diptera	Tachinidae	Dexiinae		Kirbya	Kirbya moerens		Jaakko L.O. Pohjoismaeki	jaakkop@uef.fi
JP00341	Arthropoda	Insecta	Diptera	Tachinidae	Tachininae		Tachina	Tachina lurida		Jaakko L.O. Pohjoismaeki	jaakkop@uef.fi
JP00342	Arthropoda	Insecta	Diptera	Tachinidae	Exoristinae		Phryno	Phryno vetula		Jaakko L.O. Pohjoismaeki	jaakkop@uef.fi
JP00343	Arthropoda	Insecta	Diptera	Tachinidae	Dexiinae		Cyrtophleba	Cyrtophleba ruricola		Jaakko L.O. Pohjoismaeki	jaakkop@uef.fi
JP00344	Arthropoda	Insecta	Diptera	Tachinidae	Exoristinae		Paracraspedothrix	Paracraspedothrix montivaga		Jaakko L.O. Pohjoismaeki	jaakkop@uef.fi
JP00345	Arthropoda	Insecta	Diptera	Tachinidae	Tachininae		Mintho	Mintho rufiventris		Jaakko L.O. Pohjoismaeki	jaakkop@uef.fi
JP00346	Arthropoda	Insecta	Diptera	Tachinidae	Exoristinae		Exorista	Exorista deligata		Jaakko L.O. Pohjoismaeki	jaakkop@uef.fi
JP00347	Arthropoda	Insecta	Diptera	Tachinidae	Exoristinae		Exorista	Exorista glossatorum		Jaakko L.O. Pohjoismaeki	jaakkop@uef.fi
JP00348	Arthropoda	Insecta	Diptera	Tachinidae	Exoristinae		Phorocera	Phorocera assimilis		Jaakko L.O. Pohjoismaeki	jaakkop@uef.fi
JP00349	Arthropoda	Insecta	Diptera	Tachinidae	Dexiinae		Pandelleia	Pandelleia albipennis		Hans-Peter Tschorsnig	hanspeter.tschorsnig@smns-bw.de
JP00350	Arthropoda	Insecta	Diptera	Tachinidae	Dexiinae		Pandelleia	Pandelleia albipennis		Hans-Peter Tschorsnig	hanspeter.tschorsnig@smns-bw.de
JP00351	Arthropoda	Insecta	Diptera	Tachinidae	Dexiinae		Zeuxia	Zeuxia subapennina		Jaakko L.O. Pohjoismaeki	jaakkop@uef.fi
JP00352	Arthropoda	Insecta	Diptera	Tachinidae	Dexiinae		Voria			Jaakko L.O. Pohjoismaeki	jaakkop@uef.fi
JP00353	Arthropoda	Insecta	Diptera	Tachinidae	Phasiinae		Phasia	Phasia theodori		Jaakko L.O. Pohjoismaeki	jaakkop@uef.fi
JP00354	Arthropoda	Insecta	Diptera	Tachinidae	Phasiinae		Phasia	Phasia pusilla		Jaakko L.O. Pohjoismaeki	jaakkop@uef.fi
JP00355	Arthropoda	Insecta	Diptera	Tachinidae	Tachininae		Trichactia	Trichactia pictiventris		Jaakko L.O. Pohjoismaeki	jaakkop@uef.fi
JP00356	Arthropoda	Insecta	Diptera	Tachinidae	Goniinae		Lydella	Lydella grisescens		Jaakko L.O. Pohjoismaeki	jaakkop@uef.fi
JP00357	Arthropoda	Insecta	Diptera	Tachinidae	Exoristinae		Phebellia	Phebellia stulta		Jaakko L.O. Pohjoismaeki	jaakkop@uef.fi
JP00358	Arthropoda	Insecta	Diptera	Tachinidae	Exoristinae		Eumea	Eumea linearicornis		Jaakko L.O. Pohjoismaeki	jaakkop@uef.fi
JP00359	Arthropoda	Insecta	Diptera	Tachinidae	Exoristinae		Phebellia	Phebellia glaucoides		Jaakko L.O. Pohjoismaeki	jaakkop@uef.fi
JP00360	Arthropoda	Insecta	Diptera	Tachinidae	Exoristinae		Phebellia	Phebellia margaretae		Jaakko L.O. Pohjoismaeki	jaakkop@uef.fi
JP00361	Arthropoda	Insecta	Diptera	Tachinidae	Exoristinae		Phorocera	Phorocera assimilis		Jaakko L.O. Pohjoismaeki	jaakkop@uef.fi
JP00362	Arthropoda	Insecta	Diptera	Tachinidae	Exoristinae		Phorocera	Phorocera obscura		Jaakko L.O. Pohjoismaeki	jaakkop@uef.fi
JP00363	Arthropoda	Insecta	Diptera	Tachinidae	Exoristinae		Ocytata	Ocytata pallipes		Jaakko L.O. Pohjoismaeki	jaakkop@uef.fi
JP00364	Arthropoda	Insecta	Diptera	Tachinidae	Tachininae		Neaera	Neaera atra		Hans-Peter Tschorsnig	hanspeter.tschorsnig@smns-bw.de
JP00365	Arthropoda	Insecta	Diptera	Tachinidae	Dexiinae		Billaea	Billaea biserialis		Hans-Peter Tschorsnig	hanspeter.tschorsnig@smns-bw.de
JP00366	Arthropoda	Insecta	Diptera	Tachinidae	Dexiinae		Billaea	Billaea biserialis		Hans-Peter Tschorsnig	hanspeter.tschorsnig@smns-bw.de
JP00367	Arthropoda	Insecta	Diptera	Tachinidae	Exoristinae		Exorista			Jaakko L.O. Pohjoismaeki	jaakkop@uef.fi
jka09-05298	Arthropoda	Insecta	Diptera	Tachinidae	Phasiinae		Subclytia	Subclytia rotundiventris		Jere Kahanpaa	jere.kahanpaa@helsinki.fi
JKA12-0931	Arthropoda	Insecta	Diptera	Tachinidae	Phasiinae		Gymnosoma	Gymnosoma dolycoridis		Jere Kahanpaa	jere.kahanpaa@helsinki.fi
jka09-04981	Arthropoda	Insecta	Diptera	Tachinidae	Phasiinae		Gymnosoma	Gymnosoma dolycoridis		Jere Kahanpaa	jere.kahanpaa@helsinki.fi
jka07-05559	Arthropoda	Insecta	Diptera	Tachinidae	Phasiinae		Gymnosoma	Gymnosoma dolycoridis		Jere Kahanpaa	jere.kahanpaa@helsinki.fi
jka07-05568	Arthropoda	Insecta	Diptera	Tachinidae	Phasiinae		Gymnosoma	Gymnosoma dolycoridis		Jere Kahanpaa	jere.kahanpaa@helsinki.fi
JKA12-0933	Arthropoda	Insecta	Diptera	Tachinidae	Phasiinae		Gymnosoma	Gymnosoma nudifrons		Jere Kahanpaa	jere.kahanpaa@helsinki.fi
jka-05-02928	Arthropoda	Insecta	Diptera	Tachinidae	Phasiinae		Gymnosoma	Gymnosoma nudifrons		Jere Kahanpaa	jere.kahanpaa@helsinki.fi
JKA12-0932	Arthropoda	Insecta	Diptera	Tachinidae	Phasiinae		Gymnosoma	Gymnosoma nudifrons		Jere Kahanpaa	jere.kahanpaa@helsinki.fi
jka-05-00451	Arthropoda	Insecta	Diptera	Tachinidae	Phasiinae		Gymnosoma	Gymnosoma nudifrons		Jere Kahanpaa	jere.kahanpaa@helsinki.fi
jka08-00455	Arthropoda	Insecta	Diptera	Tachinidae	Phasiinae		Phasia	Phasia pusilla		Jere Kahanpaa	jere.kahanpaa@helsinki.fi
JKA12-0935	Arthropoda	Insecta	Diptera	Tachinidae	Phasiinae		Phasia	Phasia aurulans		Jere Kahanpaa	jere.kahanpaa@helsinki.fi
jka09-05729	Arthropoda	Insecta	Diptera	Tachinidae	Phasiinae		Phasia	Phasia aurulans		Jere Kahanpaa	jere.kahanpaa@helsinki.fi
jka07-04541	Arthropoda	Insecta	Diptera	Tachinidae	Phasiinae		Phasia	Phasia obesa		Jere Kahanpaa	jere.kahanpaa@helsinki.fi
jka06-00525	Arthropoda	Insecta	Diptera	Tachinidae	Phasiinae		Phasia	Phasia subcoleoptrata		Jere Kahanpaa	jere.kahanpaa@helsinki.fi
jka07-04405	Arthropoda	Insecta	Diptera	Tachinidae	Phasiinae		Phasia	Phasia barbifrons		Jere Kahanpaa	jere.kahanpaa@helsinki.fi
jka10-00117	Arthropoda	Insecta	Diptera	Tachinidae	Phasiinae		Phania	Phania thoracica		Jere Kahanpaa	jere.kahanpaa@helsinki.fi
jka09-05552	Arthropoda	Insecta	Diptera	Tachinidae	Exoristinae		Bessa	Bessa selecta		Jere Kahanpaa	jere.kahanpaa@helsinki.fi
jka06-01234	Arthropoda	Insecta	Diptera	Tachinidae	Exoristinae		Belida	Belida angelicae		Jere Kahanpaa	jere.kahanpaa@helsinki.fi
jka06-01300	Arthropoda	Insecta	Diptera	Tachinidae	Exoristinae		Belida	Belida angelicae		Jere Kahanpaa	jere.kahanpaa@helsinki.fi
jka07-05432	Arthropoda	Insecta	Diptera	Tachinidae	Phasiinae		Phania	Phania thoracica		Jere Kahanpaa	jere.kahanpaa@helsinki.fi
JKA12-0936	Arthropoda	Insecta	Diptera	Tachinidae	Exoristinae		Medina	Medina collaris		Jere Kahanpaa	jere.kahanpaa@helsinki.fi
JKA12-0937	Arthropoda	Insecta	Diptera	Tachinidae	Exoristinae		Medina			Jere Kahanpaa	jere.kahanpaa@helsinki.fi		sp. nr. collaris
jka06-02329	Arthropoda	Insecta	Diptera	Tachinidae	Exoristinae		Admontia	Admontia blanda		Jere Kahanpaa	jere.kahanpaa@helsinki.fi
jka09-04283	Arthropoda	Insecta	Diptera	Tachinidae	Exoristinae		Admontia	Admontia blanda		Jere Kahanpaa	jere.kahanpaa@helsinki.fi
jka08-00016	Arthropoda	Insecta	Diptera	Tachinidae	Exoristinae		Oswaldia	Oswaldia muscaria		Jere Kahanpaa	jere.kahanpaa@helsinki.fi
jka10-02702	Arthropoda	Insecta	Diptera	Tachinidae	Exoristinae		Oswaldia	Oswaldia muscaria		Jere Kahanpaa	jere.kahanpaa@helsinki.fi
JKA12-0938	Arthropoda	Insecta	Diptera	Tachinidae	Exoristinae		Winthemia	Winthemia quadripustulata		Jere Kahanpaa	jere.kahanpaa@helsinki.fi
JKA12-0939	Arthropoda	Insecta	Diptera	Tachinidae	Exoristinae		Aplomya	Aplomya confinis		Jere Kahanpaa	jere.kahanpaa@helsinki.fi
jka-05-02998	Arthropoda	Insecta	Diptera	Tachinidae	Exoristinae		Tlephusa	Tlephusa cincinna		Jere Kahanpaa	jere.kahanpaa@helsinki.fi
jka10-03381	Arthropoda	Insecta	Diptera	Tachinidae	Exoristinae		Tlephusa	Tlephusa cincinna		Jere Kahanpaa	jere.kahanpaa@helsinki.fi
jka-05-02092	Arthropoda	Insecta	Diptera	Tachinidae	Exoristinae		Lydella	Lydella ripae		Jere Kahanpaa	jere.kahanpaa@helsinki.fi
JKA12-0940	Arthropoda	Insecta	Diptera	Tachinidae	Exoristinae		Lydella	Lydella stabulans		Jere Kahanpaa	jere.kahanpaa@helsinki.fi
JKA12-0941	Arthropoda	Insecta	Diptera	Tachinidae	Exoristinae		Hubneria	Hubneria affinis		Jere Kahanpaa	jere.kahanpaa@helsinki.fi		Previous ID: Huebneria affinis
jka10-02193	Arthropoda	Insecta	Diptera	Tachinidae	Exoristinae		Carcelia	Carcelia tibialis		Jere Kahanpaa	jere.kahanpaa@helsinki.fi
JKA12-0942	Arthropoda	Insecta	Diptera	Tachinidae	Exoristinae		Erycia	Erycia furibunda		Jere Kahanpaa	jere.kahanpaa@helsinki.fi
JKA12-0943	Arthropoda	Insecta	Diptera	Tachinidae	Exoristinae		Platymya	Platymya fimbriata		Jere Kahanpaa	jere.kahanpaa@helsinki.fi
jka-05-03818	Arthropoda	Insecta	Diptera	Tachinidae	Exoristinae		Platymya	Platymya fimbriata		Jere Kahanpaa	jere.kahanpaa@helsinki.fi
JKA12-0944	Arthropoda	Insecta	Diptera	Tachinidae	Exoristinae		Erynnia	Erynnia ocypterata		Jere Kahanpaa	jere.kahanpaa@helsinki.fi
JKA12-0945	Arthropoda	Insecta	Diptera	Tachinidae	Exoristinae		Hebia	Hebia flavipes		Jere Kahanpaa	jere.kahanpaa@helsinki.fi
jka06-00105	Arthropoda	Insecta	Diptera	Tachinidae	Exoristinae		Gonia	Gonia ornata		Jere Kahanpaa	jere.kahanpaa@helsinki.fi
JKA12-0946	Arthropoda	Insecta	Diptera	Tachinidae	Exoristinae		Gonia	Gonia picea		Jaakko L.O. Pohjoismaeki	jaakkop@uef.fi		Was identified as Gonia ornata. Assingned as picea due to COI. Has enough dusting to be a dark form of ornata!
JKA12-0947	Arthropoda	Insecta	Diptera	Tachinidae	Tachininae		Lydina	Lydina aenea		Jere Kahanpaa	jere.kahanpaa@helsinki.fi
jka-05-03941	Arthropoda	Insecta	Diptera	Tachinidae	Tachininae		Tachina	Tachina fera		Jere Kahanpaa	jere.kahanpaa@helsinki.fi
jka-05-02972	Arthropoda	Insecta	Diptera	Tachinidae	Tachininae		Tachina	Tachina fera		Jere Kahanpaa	jere.kahanpaa@helsinki.fi
jka07-05418	Arthropoda	Insecta	Diptera	Tachinidae	Tachininae		Tachina	Tachina fera		Jere Kahanpaa	jere.kahanpaa@helsinki.fi
jka06-01288	Arthropoda	Insecta	Diptera	Tachinidae	Tachininae		Tachina	Tachina fera		Jere Kahanpaa	jere.kahanpaa@helsinki.fi
JKA12-0948	Arthropoda	Insecta	Diptera	Tachinidae	Tachininae		Tachina	Tachina nr. magnicornis		Jere Kahanpaa	jere.kahanpaa@helsinki.fi
JKA12-0949	Arthropoda	Insecta	Diptera	Tachinidae	Tachininae		Tachina	Tachina nr. magnicornis		Jere Kahanpaa	jere.kahanpaa@helsinki.fi
jka07-03019	Arthropoda	Insecta	Diptera	Tachinidae	Tachininae		Tachina	Tachina nr. magnicornis		Jere Kahanpaa	jere.kahanpaa@helsinki.fi
jka07-07207	Arthropoda	Insecta	Diptera	Tachinidae	Tachininae		Tachina	Tachina nr. magnicornis		Jere Kahanpaa	jere.kahanpaa@helsinki.fi
jka07-06244	Arthropoda	Insecta	Diptera	Tachinidae	Tachininae		Tachina	Tachina nr. magnicornis		Jere Kahanpaa	jere.kahanpaa@helsinki.fi
jka07-05442	Arthropoda	Insecta	Diptera	Tachinidae	Tachininae		Tachina	Tachina nr. magnicornis		Jere Kahanpaa	jere.kahanpaa@helsinki.fi
jka07-07109	Arthropoda	Insecta	Diptera	Tachinidae	Tachininae		Tachina	Tachina ursina		Jere Kahanpaa	jere.kahanpaa@helsinki.fi
JKA12-0950	Arthropoda	Insecta	Diptera	Tachinidae	Tachininae		Tachina	Tachina grossa		Jere Kahanpaa	jere.kahanpaa@helsinki.fi
jka07-05400	Arthropoda	Insecta	Diptera	Tachinidae	Tachininae		Nowickia	Nowickia marklini		Jere Kahanpaa	jere.kahanpaa@helsinki.fi		Previous ID: Nowickia marklini
JKA12-0951	Arthropoda	Insecta	Diptera	Tachinidae	Tachininae		Eurithia	Eurithia anthophila		Jere Kahanpaa	jere.kahanpaa@helsinki.fi
jka10-02053	Arthropoda	Insecta	Diptera	Tachinidae	Tachininae		Eurithia	Eurithia consobrina		Jere Kahanpaa	jere.kahanpaa@helsinki.fi
jka08-00018	Arthropoda	Insecta	Diptera	Tachinidae	Tachininae		Gymnocheta			Jere Kahanpaa	jere.kahanpaa@helsinki.fi		sp. nr. viridis
JKA12-0952	Arthropoda	Insecta	Diptera	Tachinidae	Tachininae		Zophomyia	Zophomyia temula		Jere Kahanpaa	jere.kahanpaa@helsinki.fi
jka06-00769	Arthropoda	Insecta	Diptera	Tachinidae	Tachininae		Cleonice	Cleonice callida		Jere Kahanpaa	jere.kahanpaa@helsinki.fi
jka10-00738	Arthropoda	Insecta	Diptera	Tachinidae	Tachininae		Cleonice	Cleonice callida		Jere Kahanpaa	jere.kahanpaa@helsinki.fi
JKA12-0953	Arthropoda	Insecta	Diptera	Tachinidae	Tachininae		Pelatachina	Pelatachina tibialis		Jere Kahanpaa	jere.kahanpaa@helsinki.fi
jka10-00231	Arthropoda	Insecta	Diptera	Tachinidae	Tachininae		Anthomyiopsis	Anthomyiopsis nigrisquamata		Jere Kahanpaa	jere.kahanpaa@helsinki.fi
JKA12-0954	Arthropoda	Insecta	Diptera	Tachinidae	Tachininae		Phytomyptera	Phytomyptera nigrina		Jere Kahanpaa	jere.kahanpaa@helsinki.fi
jka06-02728	Arthropoda	Insecta	Diptera	Tachinidae	Tachininae		Ceromya	Ceromya silacea		Jere Kahanpaa	jere.kahanpaa@helsinki.fi
jka06-02284	Arthropoda	Insecta	Diptera	Tachinidae	Tachininae		Ceromya	Ceromya silacea		Jere Kahanpaa	jere.kahanpaa@helsinki.fi
jka09-04687	Arthropoda	Insecta	Diptera	Tachinidae	Tachininae		Actia	Actia lamia		Jere Kahanpaa	jere.kahanpaa@helsinki.fi
jka06-00491	Arthropoda	Insecta	Diptera	Tachinidae	Tachininae		Actia	Actia lamia		Jere Kahanpaa	jere.kahanpaa@helsinki.fi
JKA12-0955	Arthropoda	Insecta	Diptera	Tachinidae	Tachininae		Ceranthia	Ceranthia abdominalis		Jere Kahanpaa	jere.kahanpaa@helsinki.fi
JKA12-0956	Arthropoda	Insecta	Diptera	Tachinidae	Tachininae		Ceranthia	Ceranthia lichtwardtiana		Jere Kahanpaa	jere.kahanpaa@helsinki.fi
jka07-06830	Arthropoda	Insecta	Diptera	Tachinidae	Tachininae		Siphona	Siphona pauciseta		Jaakko L.O. Pohjoismaeki	jaakkop@uef.fi		Identified as boreata by Christer Bergstroem. Seems to be a dark knee form of pauciseta. Antenna too short for boreata male and not widened apically!
jka07-01818	Arthropoda	Insecta	Diptera	Tachinidae	Tachininae		Siphona	Siphona pauciseta		Jaakko L.O. Pohjoismaeki	jaakkop@uef.fi		Identified as boreata by Christer Bergstroem. Seems to be dark knee form of pauciseta.
JKA12-0957	Arthropoda	Insecta	Diptera	Tachinidae	Tachininae		Siphona	Siphona boreata		Jere Kahanpaa	jere.kahanpaa@helsinki.fi
jka07-04069	Arthropoda	Insecta	Diptera	Tachinidae	Tachininae		Siphona	Siphona pauciseta		Jaakko L.O. Pohjoismaeki	jaakkop@uef.fi		Identified as boreata by Christer Bergstroem
jka06-02381	Arthropoda	Insecta	Diptera	Tachinidae	Tachininae		Siphona	Siphona boreata		Christer Bergstroem
jka09-05832	Arthropoda	Insecta	Diptera	Tachinidae	Tachininae		Siphona	Siphona collini		Jere Kahanpaa	jere.kahanpaa@helsinki.fi
jka06-00482	Arthropoda	Insecta	Diptera	Tachinidae	Tachininae		Siphona	Siphona collini		Jere Kahanpaa	jere.kahanpaa@helsinki.fi
jka-05-00342	Arthropoda	Insecta	Diptera	Tachinidae	Tachininae		Siphona	Siphona collini		Christer Bergstroem
JKA12-0958	Arthropoda	Insecta	Diptera	Tachinidae	Tachininae		Siphona	Siphona confusa		Jere Kahanpaa	jere.kahanpaa@helsinki.fi
JKA12-0959	Arthropoda	Insecta	Diptera	Tachinidae	Tachininae		Siphona	Siphona confusa		Christer Bergstroem
jka07-06566	Arthropoda	Insecta	Diptera	Tachinidae	Tachininae		Siphona	Siphona confusa		Christer Bergstroem
jka06-00334	Arthropoda	Insecta	Diptera	Tachinidae	Tachininae		Siphona	Siphona confusa		Christer Bergstroem
jka06-02638	Arthropoda	Insecta	Diptera	Tachinidae	Tachininae		Siphona	Siphona flavifrons		Jere Kahanpaa	jere.kahanpaa@helsinki.fi
JKA12-0960	Arthropoda	Insecta	Diptera	Tachinidae	Tachininae		Siphona	Siphona flavifrons		Jere Kahanpaa	jere.kahanpaa@helsinki.fi
jka06-02375	Arthropoda	Insecta	Diptera	Tachinidae	Tachininae		Siphona	Siphona flavifrons		Jere Kahanpaa	jere.kahanpaa@helsinki.fi
jka06-02692	Arthropoda	Insecta	Diptera	Tachinidae	Tachininae		Siphona	Siphona flavifrons		Jere Kahanpaa	jere.kahanpaa@helsinki.fi
jka06-01416	Arthropoda	Insecta	Diptera	Tachinidae	Tachininae		Siphona	Siphona geniculata		Christer Bergstroem
jka07-03528	Arthropoda	Insecta	Diptera	Tachinidae	Tachininae		Siphona	Siphona geniculata		Christer Bergstroem
jka06-00799	Arthropoda	Insecta	Diptera	Tachinidae	Tachininae		Siphona	Siphona geniculata		Christer Bergstroem
jka-05-04538	Arthropoda	Insecta	Diptera	Tachinidae	Tachininae		Siphona	Siphona geniculata		Christer Bergstroem
JKA12-0961	Arthropoda	Insecta	Diptera	Tachinidae	Tachininae		Siphona	Siphona ingerae		Jere Kahanpaa	jere.kahanpaa@helsinki.fi
jka07-06463	Arthropoda	Insecta	Diptera	Tachinidae	Tachininae		Siphona	Siphona ingerae		Jere Kahanpaa	jere.kahanpaa@helsinki.fi
JKA12-0962	Arthropoda	Insecta	Diptera	Tachinidae	Tachininae		Siphona	Siphona hokkaidensis		Jere Kahanpaa	jere.kahanpaa@helsinki.fi
jka07-01836	Arthropoda	Insecta	Diptera	Tachinidae	Tachininae		Siphona	Siphona maculata		Christer Bergstroem
jka-05-00258	Arthropoda	Insecta	Diptera	Tachinidae	Tachininae		Siphona	Siphona maculata		Christer Bergstroem
JKA12-0965	Arthropoda	Insecta	Diptera	Tachinidae	Tachininae		Siphona	Siphona paludosa		Jere Kahanpaa	jere.kahanpaa@helsinki.fi
jka-05-03391	Arthropoda	Insecta	Diptera	Tachinidae	Tachininae		Siphona	Siphona paludosa		Jere Kahanpaa	jere.kahanpaa@helsinki.fi
JKA12-0966	Arthropoda	Insecta	Diptera	Tachinidae	Tachininae		Siphona	Siphona paludosa		Jere Kahanpaa	jere.kahanpaa@helsinki.fi
JKA12-0964	Arthropoda	Insecta	Diptera	Tachinidae	Tachininae		Siphona	Siphona paludosa		Jere Kahanpaa	jere.kahanpaa@helsinki.fi
jka-05-03360	Arthropoda	Insecta	Diptera	Tachinidae	Tachininae		Siphona	Siphona pauciseta		Christer Bergstroem
jka-05-00763	Arthropoda	Insecta	Diptera	Tachinidae	Tachininae		Siphona	Siphona pauciseta		Christer Bergstroem
JKA12-0963	Arthropoda	Insecta	Diptera	Tachinidae	Tachininae		Siphona	Siphona pauciseta		Jere Kahanpaa	jere.kahanpaa@helsinki.fi
jka07-03390	Arthropoda	Insecta	Diptera	Tachinidae	Tachininae		Siphona	Siphona rossica		Christer Bergstroem
jka07-03842	Arthropoda	Insecta	Diptera	Tachinidae	Tachininae		Siphona	Siphona setosa		Christer Bergstroem
jka07-05555	Arthropoda	Insecta	Diptera	Tachinidae	Tachininae		Siphona	Siphona setosa		Christer Bergstroem
jka09-05417	Arthropoda	Insecta	Diptera	Tachinidae	Tachininae		Leskia	Leskia aurea		Jere Kahanpaa	jere.kahanpaa@helsinki.fi
jka07-03328	Arthropoda	Insecta	Diptera	Tachinidae	Tachininae		Solieria	Solieria pacifica		Jere Kahanpaa	jere.kahanpaa@helsinki.fi		Was originally identified as inanis
jka10-01368	Arthropoda	Insecta	Diptera	Tachinidae	Dexiinae		Trixa	Trixa caerulescens		Jere Kahanpaa	jere.kahanpaa@helsinki.fi
jka10-02736	Arthropoda	Insecta	Diptera	Tachinidae	Dexiinae		Trixa	Trixa caerulescens		Jere Kahanpaa	jere.kahanpaa@helsinki.fi
jka10-02151	Arthropoda	Insecta	Diptera	Tachinidae	Dexiinae		Trixa	Trixa caerulescens		Jere Kahanpaa	jere.kahanpaa@helsinki.fi
JKA12-0967	Arthropoda	Insecta	Diptera	Tachinidae	Dexiinae		Dinera	Dinera grisescens		Jere Kahanpaa	jere.kahanpaa@helsinki.fi
JKA12-0968	Arthropoda	Insecta	Diptera	Tachinidae	Dexiinae		Dinera	Dinera grisescens		Jere Kahanpaa	jere.kahanpaa@helsinki.fi
jka06-01776	Arthropoda	Insecta	Diptera	Tachinidae	Dexiinae		Prosena	Prosena siberita		Jere Kahanpaa	jere.kahanpaa@helsinki.fi
JKA12-0969	Arthropoda	Insecta	Diptera	Tachinidae	Dexiinae		Eriothrix	Eriothrix rufomaculatus		Jere Kahanpaa	jere.kahanpaa@helsinki.fi
jka06-01153	Arthropoda	Insecta	Diptera	Tachinidae	Dexiinae		Trafoia	Trafoia monticola		Jere Kahanpaa	jere.kahanpaa@helsinki.fi
jka10-02269	Arthropoda	Insecta	Diptera	Tachinidae	Dexiinae		Campylocheta	Campylocheta inepta		Jere Kahanpaa	jere.kahanpaa@helsinki.fi
JKA12-0971	Arthropoda	Insecta	Diptera	Tachinidae	Dexiinae		Campylocheta	Campylocheta inepta		Jere Kahanpaa	jere.kahanpaa@helsinki.fi
jka10-02524	Arthropoda	Insecta	Diptera	Tachinidae	Dexiinae		Campylocheta	Campylocheta inepta		Jere Kahanpaa	jere.kahanpaa@helsinki.fi
JKA12-0972	Arthropoda	Insecta	Diptera	Tachinidae	Dexiinae		Campylocheta	Campylocheta inepta		Jere Kahanpaa	jere.kahanpaa@helsinki.fi
jka10-02249	Arthropoda	Insecta	Diptera	Tachinidae	Dexiinae		Blepharomyia	Blepharomyia angustifrons		Jere Kahanpaa	jere.kahanpaa@helsinki.fi
jka08-00014	Arthropoda	Insecta	Diptera	Tachinidae	Dexiinae		Blepharomyia	Blepharomyia piliceps		Jere Kahanpaa	jere.kahanpaa@helsinki.fi
jka10-02208	Arthropoda	Insecta	Diptera	Tachinidae	Dexiinae		Athrycia	Athrycia trepida		Jere Kahanpaa	jere.kahanpaa@helsinki.fi
jka08-00649	Arthropoda	Insecta	Diptera	Tachinidae	Dexiinae		Athrycia	Athrycia trepida		Jere Kahanpaa	jere.kahanpaa@helsinki.fi
jka-05-00788	Arthropoda	Insecta	Diptera	Tachinidae	Dexiinae		Cyrtophleba	Cyrtophleba ruricola		Jere Kahanpaa	jere.kahanpaa@helsinki.fi
jka06-00285	Arthropoda	Insecta	Diptera	Tachinidae	Dexiinae		Cyrtophleba	Cyrtophleba ruricola		Jere Kahanpaa	jere.kahanpaa@helsinki.fi
jka06-00502	Arthropoda	Insecta	Diptera	Tachinidae	Dexiinae		Dufouria	Dufouria nigrita		Jere Kahanpaa	jere.kahanpaa@helsinki.fi
jka08-00075	Arthropoda	Insecta	Diptera	Tachinidae	Dexiinae		Rondania	Rondania fasciata		Jere Kahanpaa	jere.kahanpaa@helsinki.fi
JKA12-0974	Arthropoda	Insecta	Diptera	Tachinidae	Dexiinae		Rondania	Rondania fasciata		Jere Kahanpaa	jere.kahanpaa@helsinki.fi
JKA12-0975	Arthropoda	Insecta	Diptera	Tachinidae	Dexiinae		Microsoma	Microsoma exiguum		Jere Kahanpaa	jere.kahanpaa@helsinki.fi
jka-05-02932	Arthropoda	Insecta	Diptera	Tachinidae	Phasiinae		Gymnosoma	Gymnosoma dolycoridis		Jere Kahanpaa	jere.kahanpaa@helsinki.fi
JKA12-0978	Arthropoda	Insecta	Diptera	Tachinidae	Tachininae		Cleonice	Cleonice keteli		Jere Kahanpaa	jere.kahanpaa@helsinki.fi
JKA12-0980	Arthropoda	Insecta	Diptera	Tachinidae	Tachininae		Actia	Actia crassicornis		Jere Kahanpaa	jere.kahanpaa@helsinki.fi
JKA12-0981	Arthropoda	Insecta	Diptera	Tachinidae	Tachininae		Siphona	Siphona setosa		Jere Kahanpaa	jere.kahanpaa@helsinki.fi
jka06-01317	Arthropoda	Insecta	Diptera	Tachinidae	Tachininae		Siphona	Siphona setosa		Jere Kahanpaa	jere.kahanpaa@helsinki.fi
JP00601	Arthropoda	Insecta	Diptera	Tachinidae	Tachininae		Gymnocheta	Gymnocheta viridis		Christer Bergstroem
JP00602	Arthropoda	Insecta	Diptera	Tachinidae	Tachininae		Gymnocheta	Gymnocheta viridis		Jaakko L.O. Pohjoismaeki	jaakkop@uef.fi
JP00603	Arthropoda	Insecta	Diptera	Tachinidae	Tachininae		Gymnocheta			Jaakko Pohjoismaki	jaakko.pohjoismaki@uef.fi		sp. nr. viridis
JP00604	Arthropoda	Insecta	Diptera	Tachinidae	Tachininae		Gymnocheta			Jaakko L.O. Pohjoismaeki	jaakkop@uef.fi		sp. nr. viridis
JP00605	Arthropoda	Insecta	Diptera	Tachinidae	Tachininae		Gymnocheta			Jaakko L.O. Pohjoismaeki	jaakkop@uef.fi		sp. nr. viridis
JP00606	Arthropoda	Insecta	Diptera	Tachinidae	Tachininae		Zophomyia	Zophomyia temula		Jaakko L.O. Pohjoismaeki	jaakkop@uef.fi
JP00607	Arthropoda	Insecta	Diptera	Tachinidae	Tachininae		Zophomyia	Zophomyia temula		Jaakko L.O. Pohjoismaeki	jaakkop@uef.fi
JP00608	Arthropoda	Insecta	Diptera	Tachinidae	Tachininae		Macquartia	Macquartia tenebricosa		Christer Bergstroem
JP00609	Arthropoda	Insecta	Diptera	Tachinidae	Tachininae		Phytomyptera	Phytomyptera bohemica		Jaakko L.O. Pohjoismaeki	jaakkop@uef.fi
JP00610	Arthropoda	Insecta	Diptera	Tachinidae	Tachininae		Phytomyptera	Phytomyptera cingulata		Jaakko L.O. Pohjoismaeki	jaakkop@uef.fi
JP00611	Arthropoda	Insecta	Diptera	Tachinidae	Tachininae		Phytomyptera	Phytomyptera cingulata		Jaakko L.O. Pohjoismaeki	jaakkop@uef.fi
JP00612	Arthropoda	Insecta	Diptera	Tachinidae	Tachininae		Phytomyptera	Phytomyptera minutissima		Jaakko L.O. Pohjoismaeki	jaakkop@uef.fi
JP00613	Arthropoda	Insecta	Diptera	Tachinidae	Tachininae		Phytomyptera	Phytomyptera minutissima		Antti Haarto	ahaarto@gmail.com
JP00614	Arthropoda	Insecta	Diptera	Tachinidae	Tachininae		Phytomyptera	Phytomyptera minutissima		Jaakko L.O. Pohjoismaeki	jaakkop@uef.fi
JP00615	Arthropoda	Insecta	Diptera	Tachinidae	Tachininae		Phytomyptera	Phytomyptera minutissima		Jaakko L.O. Pohjoismaeki	jaakkop@uef.fi
JP00616	Arthropoda	Insecta	Diptera	Tachinidae	Tachininae		Phytomyptera	Phytomyptera zonella		Jaakko L.O. Pohjoismaeki	jaakkop@uef.fi
JP00617	Arthropoda	Insecta	Diptera	Tachinidae	Tachininae		Entomophaga	Entomophaga sufferta		Christer Bergstroem
JP00618	Arthropoda	Insecta	Diptera	Tachinidae	Tachininae		Entomophaga	Entomophaga sufferta		Jaakko L.O. Pohjoismaeki	jaakkop@uef.fi
JP00619	Arthropoda	Insecta	Diptera	Tachinidae	Tachininae		Ceromya	Ceromya bicolor		Jaakko L.O. Pohjoismaeki	jaakkop@uef.fi
JP00620	Arthropoda	Insecta	Diptera	Tachinidae	Tachininae		Ceromya	Ceromya bicolor		Jaakko L.O. Pohjoismaeki	jaakkop@uef.fi
JP00621	Arthropoda	Insecta	Diptera	Tachinidae	Tachininae		Ceromya	Ceromya bicolor		Jaakko L.O. Pohjoismaeki	jaakkop@uef.fi
JP00622	Arthropoda	Insecta	Diptera	Tachinidae	Tachininae		Ceromya	Ceromya silacea		Jaakko L.O. Pohjoismaeki	jaakkop@uef.fi
JP00623	Arthropoda	Insecta	Diptera	Tachinidae	Tachininae		Ceromya	Ceromya silacea		Jaakko L.O. Pohjoismaeki	jaakkop@uef.fi
JP00624	Arthropoda	Insecta	Diptera	Tachinidae	Tachininae		Ceromya	Ceromya silacea		Jaakko L.O. Pohjoismaeki	jaakkop@uef.fi
JP00625	Arthropoda	Insecta	Diptera	Tachinidae	Tachininae		Ceromya	Ceromya silacea		Jaakko L.O. Pohjoismaeki	jaakkop@uef.fi
JP00626	Arthropoda	Insecta	Diptera	Tachinidae	Tachininae		Ceromya	Ceromya silacea		Jaakko L.O. Pohjoismaeki	jaakkop@uef.fi
JP00627	Arthropoda	Insecta	Diptera	Tachinidae	Tachininae		Actia	Actia crassicornis		Jaakko L.O. Pohjoismaeki	jaakkop@uef.fi
JP00628	Arthropoda	Insecta	Diptera	Tachinidae	Tachininae		Actia	Actia crassicornis		Jaakko L.O. Pohjoismaeki	jaakkop@uef.fi
JP00629	Arthropoda	Insecta	Diptera	Tachinidae	Tachininae		Actia	Actia nigroscutellata		Jaakko L.O. Pohjoismaeki	jaakkop@uef.fi
JP00630	Arthropoda	Insecta	Diptera	Tachinidae	Tachininae		Actia	Actia pilipennis		Jaakko L.O. Pohjoismaeki	jaakkop@uef.fi
JP00631	Arthropoda	Insecta	Diptera	Tachinidae	Tachininae		Aphantorhaphopsis	Aphantorhaphopsis samarensis		Jaakko L.O. Pohjoismaeki	jaakkop@uef.fi
JP00632	Arthropoda	Insecta	Diptera	Tachinidae	Tachininae		Siphona	Siphona boreata		Christer Bergstroem
JP00633	Arthropoda	Insecta	Diptera	Tachinidae	Tachininae		Siphona	Siphona boreata		Christer Bergstroem
JP00634	Arthropoda	Insecta	Diptera	Tachinidae	Tachininae		Siphona	Siphona boreata		Christer Bergstroem
JP00635	Arthropoda	Insecta	Diptera	Tachinidae	Tachininae		Siphona	Siphona collini		Christer Bergstroem
JP00636	Arthropoda	Insecta	Diptera	Tachinidae	Tachininae		Siphona	Siphona confusa		Christer Bergstroem
JP00637	Arthropoda	Insecta	Diptera	Tachinidae	Tachininae		Siphona	Siphona paludosa		Jaakko L.O. Pohjoismaeki	jaakkop@uef.fi
JP00638	Arthropoda	Insecta	Diptera	Tachinidae	Tachininae		Siphona	Siphona geniculata		Jaakko L.O. Pohjoismaeki	jaakkop@uef.fi
JP00639	Arthropoda	Insecta	Diptera	Tachinidae	Tachininae		Siphona	Siphona flavifrons		Christer Bergstroem
JP00640	Arthropoda	Insecta	Diptera	Tachinidae	Tachininae		Siphona	Siphona flavifrons		Christer Bergstroem
JP00641	Arthropoda	Insecta	Diptera	Tachinidae	Tachininae		Siphona	Siphona flavifrons		Christer Bergstroem
JP00642	Arthropoda	Insecta	Diptera	Tachinidae	Tachininae		Siphona	Siphona hokkaidensis		Christer Bergstroem
JP00643	Arthropoda	Insecta	Diptera	Tachinidae	Tachininae		Siphona	Siphona maculata		Christer Bergstroem
JP00644	Arthropoda	Insecta	Diptera	Tachinidae	Tachininae		Siphona	Siphona maculata		Jaakko L.O. Pohjoismaeki	jaakkop@uef.fi
JP00645	Arthropoda	Insecta	Diptera	Tachinidae	Tachininae		Siphona	Siphona paludosa		Jaakko L.O. Pohjoismaeki	jaakkop@uef.fi
JP00646	Arthropoda	Insecta	Diptera	Tachinidae	Tachininae		Siphona	Siphona paludosa
JP00647	Arthropoda	Insecta	Diptera	Tachinidae	Tachininae		Siphona	Siphona paludosa		Christer Bergstroem
JP00648	Arthropoda	Insecta	Diptera	Tachinidae	Tachininae		Siphona	Siphona paludosa		Christer Bergstroem
JP00649	Arthropoda	Insecta	Diptera	Tachinidae	Tachininae		Siphona	Siphona setosa		Jaakko L.O. Pohjoismaeki	jaakkop@uef.fi
JP00650	Arthropoda	Insecta	Diptera	Tachinidae	Tachininae		Siphona	Siphona setosa		Christer Bergstroem
JP00651	Arthropoda	Insecta	Diptera	Tachinidae	Tachininae		Siphona	Siphona setosa		Christer Bergstroem
JP00652	Arthropoda	Insecta	Diptera	Tachinidae	Tachininae		Siphona	Siphona subarctica		Antti Haarto	ahaarto@gmail.com
JP00653	Arthropoda	Insecta	Diptera	Tachinidae	Tachininae		Siphona	Siphona nr. variata		Christer Bergstroem
JP00654	Arthropoda	Insecta	Diptera	Tachinidae	Tachininae		Siphona	Siphona ingerae		Christer Bergstroem
JP00655	Arthropoda	Insecta	Diptera	Tachinidae	Dexiinae		Dinera	Dinera grisescens		Jaakko L.O. Pohjoismaeki	jaakkop@uef.fi
JP00656	Arthropoda	Insecta	Diptera	Tachinidae	Dexiinae		Dinera	Dinera grisescens		Jaakko L.O. Pohjoismaeki	jaakkop@uef.fi
JP00657	Arthropoda	Insecta	Diptera	Tachinidae	Dexiinae		Dinera	Dinera grisescens		Jaakko L.O. Pohjoismaeki	jaakkop@uef.fi
JP00658	Arthropoda	Insecta	Diptera	Tachinidae	Dexiinae		Billaea	Billaea irrorata		Jaakko L.O. Pohjoismaeki	jaakkop@uef.fi
JP00659	Arthropoda	Insecta	Diptera	Tachinidae	Dexiinae		Billaea	Billaea triangulifera		Jaakko L.O. Pohjoismaeki	jaakkop@uef.fi
JP00660	Arthropoda	Insecta	Diptera	Tachinidae	Dexiinae		Billaea	Billaea triangulifera		Jaakko L.O. Pohjoismaeki	jaakkop@uef.fi
JP00661	Arthropoda	Insecta	Diptera	Tachinidae	Dexiinae		Billaea	Billaea triangulifera		Jaakko L.O. Pohjoismaeki	jaakkop@uef.fi
JP00662	Arthropoda	Insecta	Diptera	Tachinidae	Dexiinae		Prosena	Prosena siberita		Jaakko L.O. Pohjoismaeki	jaakkop@uef.fi
JP00663	Arthropoda	Insecta	Diptera	Tachinidae	Dexiinae		Prosena	Prosena siberita		Jaakko L.O. Pohjoismaeki	jaakkop@uef.fi
JP00664	Arthropoda	Insecta	Diptera	Tachinidae	Dexiinae		Campylocheta	Campylocheta inepta		Jaakko L.O. Pohjoismaeki	jaakkop@uef.fi
JP00665	Arthropoda	Insecta	Diptera	Tachinidae	Dexiinae		Campylocheta	Campylocheta inepta		Jaakko L.O. Pohjoismaeki	jaakkop@uef.fi
JP00666	Arthropoda	Insecta	Diptera	Tachinidae	Dexiinae		Campylocheta	Campylocheta inepta		Jaakko L.O. Pohjoismaeki	jaakkop@uef.fi
JP00667	Arthropoda	Insecta	Diptera	Tachinidae	Dexiinae		Campylocheta	Campylocheta inepta		Jaakko L.O. Pohjoismaeki	jaakkop@uef.fi
JP00668	Arthropoda	Insecta	Diptera	Tachinidae	Dexiinae		Campylocheta	Campylocheta praecox		Jaakko L.O. Pohjoismaeki	jaakkop@uef.fi
JP00669	Arthropoda	Insecta	Diptera	Tachinidae	Dexiinae		Campylocheta	Campylocheta praecox		Jaakko L.O. Pohjoismaeki	jaakkop@uef.fi
JP00670	Arthropoda	Insecta	Diptera	Tachinidae	Dexiinae		Blepharomyia	Blepharomyia pagana		Jaakko L.O. Pohjoismaeki	jaakkop@uef.fi
JP00671	Arthropoda	Insecta	Diptera	Tachinidae	Dexiinae		Blepharomyia	Blepharomyia pagana		Jaakko L.O. Pohjoismaeki	jaakkop@uef.fi
JP00672	Arthropoda	Insecta	Diptera	Tachinidae	Dexiinae		Blepharomyia	Blepharomyia angustifrons		Jaakko L.O. Pohjoismaeki	jaakkop@uef.fi
JP00673	Arthropoda	Insecta	Diptera	Tachinidae	Dexiinae		Periscepsia	Periscepsia ringdahli		Jaakko L.O. Pohjoismaeki	jaakkop@uef.fi
JP00674	Arthropoda	Insecta	Diptera	Tachinidae	Dexiinae		Periscepsia	Periscepsia ringdahli		Jaakko L.O. Pohjoismaeki	jaakkop@uef.fi
JP00675	Arthropoda	Insecta	Diptera	Tachinidae	Dexiinae		Periscepsia	Periscepsia ringdahli		Jaakko L.O. Pohjoismaeki	jaakkop@uef.fi
JP00676	Arthropoda	Insecta	Diptera	Tachinidae	Dexiinae		Periscepsia	Periscepsia ringdahli		Jaakko L.O. Pohjoismaeki	jaakkop@uef.fi
JP00677	Arthropoda	Insecta	Diptera	Tachinidae	Dexiinae		Periscepsia	Periscepsia ringdahli		Jaakko L.O. Pohjoismaeki	jaakkop@uef.fi
JP00678	Arthropoda	Insecta	Diptera	Tachinidae	Tachininae		Loewia	Loewia erecta		Jaakko L.O. Pohjoismaeki	jaakkop@uef.fi
JP00679	Arthropoda	Insecta	Diptera	Tachinidae	Dexiinae		Athrycia	Athrycia curvinervis		Jaakko L.O. Pohjoismaeki	jaakkop@uef.fi
JP00680	Arthropoda	Insecta	Diptera	Tachinidae	Dexiinae		Athrycia	Athrycia impressa		Jaakko L.O. Pohjoismaeki	jaakkop@uef.fi
JP00681	Arthropoda	Insecta	Diptera	Tachinidae	Dexiinae		Athrycia	Athrycia impressa		Jaakko L.O. Pohjoismaeki	jaakkop@uef.fi
JP00682	Arthropoda	Insecta	Diptera	Tachinidae	Dexiinae		Athrycia	Athrycia impressa		Jaakko L.O. Pohjoismaeki	jaakkop@uef.fi
JP00683	Arthropoda	Insecta	Diptera	Tachinidae	Dexiinae		Athrycia	Athrycia trepida		Jaakko L.O. Pohjoismaeki	jaakkop@uef.fi
JP00684	Arthropoda	Insecta	Diptera	Tachinidae	Dexiinae		Athrycia	Athrycia trepida		Jaakko L.O. Pohjoismaeki	jaakkop@uef.fi
JP00685	Arthropoda	Insecta	Diptera	Tachinidae	Dexiinae		Cyrtophleba	Cyrtophleba vernalis		Jaakko L.O. Pohjoismaeki	jaakkop@uef.fi
JP00686	Arthropoda	Insecta	Diptera	Tachinidae	Dexiinae		Cyrtophleba	Cyrtophleba vernalis		Jaakko L.O. Pohjoismaeki	jaakkop@uef.fi
JP00687	Arthropoda	Insecta	Diptera	Tachinidae	Dexiinae		Cyrtophleba	Cyrtophleba vernalis		Jaakko L.O. Pohjoismaeki	jaakkop@uef.fi
JP00688	Arthropoda	Insecta	Diptera	Tachinidae	Dexiinae		Phyllomya	Phyllomya volvulus		Jaakko L.O. Pohjoismaeki	jaakkop@uef.fi
JP00689	Arthropoda	Insecta	Diptera	Tachinidae	Dexiinae		Phyllomya	Phyllomya volvulus		Jaakko L.O. Pohjoismaeki	jaakkop@uef.fi
JP00690	Arthropoda	Insecta	Diptera	Tachinidae	Dexiinae		Thelaira	Thelaira nigrina		Jaakko L.O. Pohjoismaeki	jaakkop@uef.fi
JP00691	Arthropoda	Insecta	Diptera	Tachinidae	Dexiinae		Thelaira	Thelaira nigrina		Jaakko L.O. Pohjoismaeki	jaakkop@uef.fi
JP00692	Arthropoda	Insecta	Diptera	Tachinidae	Dexiinae		Thelaira	Thelaira nigrina		Jaakko L.O. Pohjoismaeki	jaakkop@uef.fi
JP00693	Arthropoda	Insecta	Diptera	Tachinidae	Dexiinae		Thelaira	Thelaira solivaga		Jaakko L.O. Pohjoismaeki	jaakkop@uef.fi
JP00694	Arthropoda	Insecta	Diptera	Tachinidae	Dexiinae		Thelaira	Thelaira solivaga		Jaakko L.O. Pohjoismaeki	jaakkop@uef.fi
JP00695	Arthropoda	Insecta	Diptera	Tachinidae	Dexiinae		Halidaya	Halidaya aurea		Jaakko L.O. Pohjoismaeki	jaakkop@uef.fi
JP00701	Arthropoda	Insecta	Diptera	Tachinidae	Dexiinae		Rondania	Rondania fasciata		Jaakko L.O. Pohjoismaeki	jaakkop@uef.fi
JP00702	Arthropoda	Insecta	Diptera	Tachinidae	Dexiinae		Dufouria	Dufouria nigrita		Jaakko L.O. Pohjoismaeki	jaakkop@uef.fi
JP00703	Arthropoda	Insecta	Diptera	Tachinidae	Dexiinae		Dufouria	Dufouria chalybeata		Jaakko L.O. Pohjoismaeki	jaakkop@uef.fi
JP00704	Arthropoda	Insecta	Diptera	Tachinidae	Dexiinae		Dufouria	Dufouria chalybeata		Jaakko L.O. Pohjoismaeki	jaakkop@uef.fi
JP00705	Arthropoda	Insecta	Diptera	Tachinidae	Dexiinae		Dufouria	Dufouria nigrita		Antti Haarto	ahaarto@gmail.com
JP00706	Arthropoda	Insecta	Diptera	Tachinidae	Dexiinae		Microsoma	Microsoma exiguum		Jaakko L.O. Pohjoismaeki	jaakkop@uef.fi
JP00707	Arthropoda	Insecta	Diptera	Tachinidae	Dexiinae		Microsoma	Microsoma exiguum		Jaakko L.O. Pohjoismaeki	jaakkop@uef.fi
JP00708	Arthropoda	Insecta	Diptera	Tachinidae	Dexiinae		Periscepsia	Periscepsia spathulata		Jaakko L.O. Pohjoismaeki	jaakkop@uef.fi
JP00709	Arthropoda	Insecta	Diptera	Tachinidae	Phasiinae		Labigastera	Labigastera nitidula		Jaakko L.O. Pohjoismaeki	jaakkop@uef.fi
JP00710	Arthropoda	Insecta	Diptera	Tachinidae	Exoristinae		Blondelia	Blondelia nigripes		Jaakko L.O. Pohjoismaeki	jaakkop@uef.fi
JP00711	Arthropoda	Insecta	Diptera	Tachinidae	Exoristinae		Meigenia	Meigenia mutabilis		Jaakko L.O. Pohjoismaeki	jaakkop@uef.fi
JP00712	Arthropoda	Insecta	Diptera	Tachinidae	Exoristinae		Blondelia	Blondelia nigripes		Jaakko L.O. Pohjoismaeki	jaakkop@uef.fi
JP00713	Arthropoda	Insecta	Diptera	Tachinidae	Exoristinae		Phorocera	Phorocera obscura		Jaakko L.O. Pohjoismaeki	jaakkop@uef.fi
JP00714	Arthropoda	Insecta	Diptera	Tachinidae	Exoristinae		Erycia	Erycia fatua		Jaakko L.O. Pohjoismaeki	jaakkop@uef.fi
JP00715	Arthropoda	Insecta	Diptera	Tachinidae	Exoristinae		Eumea	Eumea linearicornis		Jaakko L.O. Pohjoismaeki	jaakkop@uef.fi
JP00716	Arthropoda	Insecta	Diptera	Tachinidae	Exoristinae		Tlephusa	Tlephusa cincinna		Jaakko L.O. Pohjoismaeki	jaakkop@uef.fi
JP00717	Arthropoda	Insecta	Diptera	Tachinidae	Exoristinae		Hubneria	Hubneria affinis		Jaakko L.O. Pohjoismaeki	jaakkop@uef.fi		Previous ID: Huebneria affinis
JP00718	Arthropoda	Insecta	Diptera	Tachinidae	Tachininae		Triarthria	Triarthria setipennis		Jaakko L.O. Pohjoismaeki	jaakkop@uef.fi
JP00719	Arthropoda	Insecta	Diptera	Tachinidae	Tachininae		Actia	Actia crassicornis		Jaakko L.O. Pohjoismaeki	jaakkop@uef.fi
JP00720	Arthropoda	Insecta	Diptera	Tachinidae	Tachininae		Actia	Actia crassicornis		Jaakko L.O. Pohjoismaeki	jaakkop@uef.fi
JP00721	Arthropoda	Insecta	Diptera	Tachinidae	Tachininae		Actia	Actia pilipennis		Jaakko L.O. Pohjoismaeki	jaakkop@uef.fi
JP00722	Arthropoda	Insecta	Diptera	Tachinidae	Tachininae		Actia	Actia pilipennis		Jaakko L.O. Pohjoismaeki	jaakkop@uef.fi
JP00723	Arthropoda	Insecta	Diptera	Tachinidae	Tachininae		Actia	Actia pilipennis		Jaakko L.O. Pohjoismaeki	jaakkop@uef.fi
JP00724	Arthropoda	Insecta	Diptera	Tachinidae	Tachininae		Siphona	Siphona geniculata		Jaakko L.O. Pohjoismaeki	jaakkop@uef.fi
JP00725	Arthropoda	Insecta	Diptera	Tachinidae	Tachininae		Siphona	Siphona confusa		T. Zeegers
JP00726	Arthropoda	Insecta	Diptera	Tachinidae	Tachininae		Siphona	Siphona geniculata		Jaakko L.O. Pohjoismaeki	jaakkop@uef.fi
JP00727	Arthropoda	Insecta	Diptera	Tachinidae	Tachininae		Siphona	Siphona geniculata		Jaakko L.O. Pohjoismaeki	jaakkop@uef.fi
JP00728	Arthropoda	Insecta	Diptera	Tachinidae	Tachininae		Panzeria	Panzeria rudis		Jaakko L.O. Pohjoismaeki	jaakkop@uef.fi
JP00729	Arthropoda	Insecta	Diptera	Tachinidae	Tachininae		Gymnocheta	Gymnocheta viridis		Jaakko L.O. Pohjoismaeki	jaakkop@uef.fi
JP00730	Arthropoda	Insecta	Diptera	Tachinidae	Tachininae		Gymnocheta	Gymnocheta viridis		Jaakko L.O. Pohjoismaeki	jaakkop@uef.fi
JP00731	Arthropoda	Insecta	Diptera	Tachinidae	Dexiinae		Voria	Voria ruralis		Jaakko L.O. Pohjoismaeki	jaakkop@uef.fi
JP00733	Arthropoda	Insecta	Diptera	Tachinidae	Tachininae		Macquartia	Macquartia tenebricosa		Jaakko L.O. Pohjoismaeki	jaakkop@uef.fi
JP00734	Arthropoda	Insecta	Diptera	Tachinidae	Dexiinae		Microsoma	Microsoma exiguum		Jaakko L.O. Pohjoismaeki	jaakkop@uef.fi
JP00735	Arthropoda	Insecta	Diptera	Tachinidae	Dexiinae		Microsoma	Microsoma exiguum		Jaakko L.O. Pohjoismaeki	jaakkop@uef.fi
JP00736	Arthropoda	Insecta	Diptera	Tachinidae	Dexiinae		Rondania	Rondania nr. dimidiata		Jaakko L.O. Pohjoismaeki	jaakkop@uef.fi
JP00737	Arthropoda	Insecta	Diptera	Tachinidae	Tachininae		Siphona	Siphona geniculata		Jaakko L.O. Pohjoismaeki	jaakkop@uef.fi
JP00738	Arthropoda	Insecta	Diptera	Tachinidae	Goniinae		Lydella	Lydella stabulans		Jaakko L.O. Pohjoismaeki	jaakkop@uef.fi
JP00739	Arthropoda	Insecta	Diptera	Tachinidae	Tachininae		Macquartia	Macquartia viridana		Jaakko L.O. Pohjoismaeki	jaakkop@uef.fi
JP00740	Arthropoda	Insecta	Diptera	Tachinidae	Tachininae		Ceranthia	Ceranthia tenuipalpis		Jaakko L.O. Pohjoismaeki	jaakkop@uef.fi
JP00741	Arthropoda	Insecta	Diptera	Tachinidae	Tachininae		Ceranthia	Ceranthia lichtwardtiana		Jaakko L.O. Pohjoismaeki	jaakkop@uef.fi
JP00742	Arthropoda	Insecta	Diptera	Tachinidae	Tachininae		Aphantorhaphopsis	Aphantorhaphopsis samarensis		Jaakko L.O. Pohjoismaeki	jaakkop@uef.fi
JP00743	Arthropoda	Insecta	Diptera	Tachinidae	Tachininae		Peribaea	Peribaea tibialis		Jaakko L.O. Pohjoismaeki	jaakkop@uef.fi
JP00744	Arthropoda	Insecta	Diptera	Tachinidae	Tachininae		Siphona	Siphona geniculata		Jaakko L.O. Pohjoismaeki	jaakkop@uef.fi
JP00745	Arthropoda	Insecta	Diptera	Tachinidae	Tachininae		Siphona	Siphona geniculata		Jaakko L.O. Pohjoismaeki	jaakkop@uef.fi
JP00746	Arthropoda	Insecta	Diptera	Tachinidae	Tachininae		Siphona	Siphona geniculata		Jaakko L.O. Pohjoismaeki	jaakkop@uef.fi
JP00747	Arthropoda	Insecta	Diptera	Tachinidae	Tachininae		Siphona	Siphona geniculata		Jaakko L.O. Pohjoismaeki	jaakkop@uef.fi
JP00748	Arthropoda	Insecta	Diptera	Tachinidae	Tachininae		Siphona	Siphona geniculata		Jaakko L.O. Pohjoismaeki	jaakkop@uef.fi
JP00749	Arthropoda	Insecta	Diptera	Tachinidae	Exoristinae		Exorista	Exorista larvarum		Jaakko L.O. Pohjoismaeki	jaakkop@uef.fi
JP00750	Arthropoda	Insecta	Diptera	Tachinidae	Exoristinae		Exorista	Exorista rustica		Jaakko L.O. Pohjoismaeki	jaakkop@uef.fi
JP00751	Arthropoda	Insecta	Diptera	Tachinidae	Exoristinae		Exorista	Exorista rustica		Jaakko L.O. Pohjoismaeki	jaakkop@uef.fi
JP00752	Arthropoda	Insecta	Diptera	Tachinidae	Exoristinae		Exorista	Exorista rustica		Jaakko L.O. Pohjoismaeki	jaakkop@uef.fi
JP00753	Arthropoda	Insecta	Diptera	Tachinidae	Exoristinae		Exorista	Exorista rustica		Jaakko L.O. Pohjoismaeki	jaakkop@uef.fi
JP00754	Arthropoda	Insecta	Diptera	Tachinidae	Exoristinae		Gastrolepta	Gastrolepta anthracina		Jaakko L.O. Pohjoismaeki	jaakkop@uef.fi
JP00755	Arthropoda	Insecta	Diptera	Tachinidae	Exoristinae		Medina	Medina collaris		Jaakko L.O. Pohjoismaeki	jaakkop@uef.fi
JP00756	Arthropoda	Insecta	Diptera	Tachinidae	Phasiinae		Subclytia	Subclytia rotundiventris		Jaakko L.O. Pohjoismaeki	jaakkop@uef.fi
JP00757	Arthropoda	Insecta	Diptera	Tachinidae	Phasiinae		Phasia	Phasia aurulans		Jaakko L.O. Pohjoismaeki	jaakkop@uef.fi
JP00758	Arthropoda	Insecta	Diptera	Tachinidae	Phasiinae		Phasia	Phasia aurulans		Jaakko L.O. Pohjoismaeki	jaakkop@uef.fi
JP00759	Arthropoda	Insecta	Diptera	Tachinidae	Phasiinae		Phasia	Phasia hemiptera		Jaakko L.O. Pohjoismaeki	jaakkop@uef.fi
JP00760	Arthropoda	Insecta	Diptera	Tachinidae	Phasiinae		Phasia	Phasia aurigera		Jaakko L.O. Pohjoismaeki	jaakkop@uef.fi
JP00761	Arthropoda	Insecta	Diptera	Tachinidae	Phasiinae		Phasia	Phasia obesa		Jaakko L.O. Pohjoismaeki	jaakkop@uef.fi
JP00762	Arthropoda	Insecta	Diptera	Tachinidae	Phasiinae		Phasia	Phasia pusilla		Jaakko L.O. Pohjoismaeki	jaakkop@uef.fi
JP00763	Arthropoda	Insecta	Diptera	Tachinidae	Phasiinae		Phasia	Phasia obesa		Jaakko L.O. Pohjoismaeki	jaakkop@uef.fi
JP00764	Arthropoda	Insecta	Diptera	Tachinidae	Phasiinae		Cistogaster	Cistogaster globosa		Jaakko L.O. Pohjoismaeki	jaakkop@uef.fi
JP00765	Arthropoda	Insecta	Diptera	Tachinidae	Phasiinae		Cylindromyia	Cylindromyia interrupta		Jaakko L.O. Pohjoismaeki	jaakkop@uef.fi
JP00766	Arthropoda	Insecta	Diptera	Tachinidae	Phasiinae		Cylindromyia	Cylindromyia bicolor		Jaakko L.O. Pohjoismaeki	jaakkop@uef.fi
JP00767	Arthropoda	Insecta	Diptera	Tachinidae	Phasiinae		Cylindromyia	Cylindromyia auriceps		Jaakko L.O. Pohjoismaeki	jaakkop@uef.fi
JP00768	Arthropoda	Insecta	Diptera	Tachinidae	Phasiinae		Cylindromyia	Cylindromyia brassicaria		Jaakko L.O. Pohjoismaeki	jaakkop@uef.fi
JP00769	Arthropoda	Insecta	Diptera	Tachinidae	Phasiinae		Cylindromyia	Cylindromyia brassicaria		Jaakko L.O. Pohjoismaeki	jaakkop@uef.fi
JP00770	Arthropoda	Insecta	Diptera	Tachinidae	Tachininae		Phytomyptera	Phytomyptera cingulata		Jaakko L.O. Pohjoismaeki	jaakkop@uef.fi
JP00771	Arthropoda	Insecta	Diptera	Tachinidae	Tachininae		Actia	Actia lamia		Jaakko L.O. Pohjoismaeki	jaakkop@uef.fi
JP00772	Arthropoda	Insecta	Diptera	Tachinidae	Exoristinae		Leiophora	Leiophora innoxia		Jaakko L.O. Pohjoismaeki	jaakkop@uef.fi
JP00773	Arthropoda	Insecta	Diptera	Tachinidae	Tachininae		Gymnocheta	Gymnocheta viridis		Jaakko L.O. Pohjoismaeki	jaakkop@uef.fi
JP00774	Arthropoda	Insecta	Diptera	Tachinidae	Exoristinae		Allophorocera	Allophorocera ferruginea		Jaakko L.O. Pohjoismaeki	jaakkop@uef.fi
JP00775	Arthropoda	Insecta	Diptera	Tachinidae	Tachininae		Phytomyptera	Phytomyptera zonella		Jaakko L.O. Pohjoismaeki	jaakkop@uef.fi
JP00776	Arthropoda	Insecta	Diptera	Tachinidae	Tachininae		Siphona	Siphona subarctica		Jaakko L.O. Pohjoismaeki	jaakkop@uef.fi		Placed in this species based on yellow 2nd antenna segment, black tegula and short antennae.
JP00777	Arthropoda	Insecta	Diptera	Tachinidae	Tachininae		Siphona	Siphona subarctica		Jaakko L.O. Pohjoismaeki	jaakkop@uef.fi
JP00778	Arthropoda	Insecta	Diptera	Tachinidae	Exoristinae		Oswaldia	Oswaldia eggeri		Christer Bergstroem
JP00779	Arthropoda	Insecta	Diptera	Tachinidae	Exoristinae		Exorista	Exorista deligata		Jaakko L.O. Pohjoismaeki	jaakkop@uef.fi
JP00780	Arthropoda	Insecta	Diptera	Tachinidae	Tachininae		Ceranthia	Ceranthia abdominalis		Jaakko L.O. Pohjoismaeki	jaakkop@uef.fi
JP00781	Arthropoda	Insecta	Diptera	Tachinidae	Tachininae		Aphantorhaphopsis	Aphantorhaphopsis samarensis		Jaakko L.O. Pohjoismaeki	jaakkop@uef.fi
JP00782	Arthropoda	Insecta	Diptera	Tachinidae	Tachininae		Aphantorhaphopsis	Aphantorhaphopsis siphonoides		Jaakko L.O. Pohjoismaeki	jaakkop@uef.fi
JP00783	Arthropoda	Insecta	Diptera	Tachinidae	Tachininae		Aphantorhaphopsis	Aphantorhaphopsis verralli		Jaakko L.O. Pohjoismaeki	jaakkop@uef.fi
JP00784	Arthropoda	Insecta	Diptera	Tachinidae	Tachininae		Panzeria	Panzeria vagans		Jaakko L.O. Pohjoismaeki	jaakkop@uef.fi
JP00785	Arthropoda	Insecta	Diptera	Tachinidae	Tachininae		Phytomyptera	Phytomyptera bohemica		Jaakko L.O. Pohjoismaeki	jaakkop@uef.fi
JP00786	Arthropoda	Insecta	Diptera	Tachinidae	Phasiinae		Labigastera	Labigastera forcipata		Jaakko L.O. Pohjoismaeki	jaakkop@uef.fi
JP00787	Arthropoda	Insecta	Diptera	Tachinidae	Phasiinae		Labigastera	Labigastera forcipata		Jaakko L.O. Pohjoismaeki	jaakkop@uef.fi
JP00788	Arthropoda	Insecta	Diptera	Tachinidae	Exoristinae		Meigenia	Meigenia dorsalis		Jaakko L.O. Pohjoismaeki	jaakkop@uef.fi
JP00789	Arthropoda	Insecta	Diptera	Tachinidae	Exoristinae		Carcelia	Carcelia lucorum		Jaakko L.O. Pohjoismaeki	jaakkop@uef.fi
JP00790	Arthropoda	Insecta	Diptera	Tachinidae	Tachininae		Tachina	Tachina nr. magnicornis		Jaakko L.O. Pohjoismaeki	jaakkop@uef.fi
JP00791	Arthropoda	Insecta	Diptera	Tachinidae	Tachininae		Tachina	Tachina fera		Jaakko L.O. Pohjoismaeki	jaakkop@uef.fi
JP00792	Arthropoda	Insecta	Diptera	Tachinidae	Tachininae		Tachina	Tachina fera		Jaakko L.O. Pohjoismaeki	jaakkop@uef.fi
JP00793	Arthropoda	Insecta	Diptera	Tachinidae	Tachininae		Tachina	Tachina fera		Jaakko L.O. Pohjoismaeki	jaakkop@uef.fi
JP00794	Arthropoda	Insecta	Diptera	Tachinidae	Exoristinae		Ligeria	Ligeria angusticornis		Jaakko L.O. Pohjoismaeki	jaakkop@uef.fi
JP00795	Arthropoda	Insecta	Diptera	Tachinidae	Exoristinae		Winthemia	Winthemia speciosa		Jaakko L.O. Pohjoismaeki	jaakkop@uef.fi
JP00501	Arthropoda	Insecta	Diptera	Tachinidae	Phasiinae		Subclytia	Subclytia rotundiventris		Jaakko L.O. Pohjoismaeki	jaakkop@uef.fi
JP00502	Arthropoda	Insecta	Diptera	Tachinidae	Phasiinae		Phasia	Phasia subcoleoptrata		Jaakko L.O. Pohjoismaeki	jaakkop@uef.fi
JP00503	Arthropoda	Insecta	Diptera	Tachinidae	Phasiinae		Phasia	Phasia barbifrons		Jaakko L.O. Pohjoismaeki	jaakkop@uef.fi
JP00504	Arthropoda	Insecta	Diptera	Tachinidae	Phasiinae		Gymnosoma	Gymnosoma dolycoridis		Jaakko L.O. Pohjoismaeki	jaakkop@uef.fi
JP00505	Arthropoda	Insecta	Diptera	Tachinidae	Phasiinae		Phasia	Phasia subcoleoptrata		Jaakko L.O. Pohjoismaeki	jaakkop@uef.fi
JP00506	Arthropoda	Insecta	Diptera	Tachinidae	Exoristinae		Belida	Belida angelicae		Jaakko L.O. Pohjoismaeki	jaakkop@uef.fi
JP00507	Arthropoda	Insecta	Diptera	Tachinidae	Exoristinae		Belida	Belida angelicae		Jaakko L.O. Pohjoismaeki	jaakkop@uef.fi
JP00508	Arthropoda	Insecta	Diptera	Tachinidae	Exoristinae		Diplostichus	Diplostichus janitrix		Jaakko L.O. Pohjoismaeki	jaakkop@uef.fi
JP00509	Arthropoda	Insecta	Diptera	Tachinidae	Exoristinae		Diplostichus	Diplostichus janitrix		Jaakko L.O. Pohjoismaeki	jaakkop@uef.fi
JP00510	Arthropoda	Insecta	Diptera	Tachinidae	Exoristinae		Meigenia	Meigenia dorsalis		Jaakko L.O. Pohjoismaeki	jaakkop@uef.fi
JP00511	Arthropoda	Insecta	Diptera	Tachinidae	Exoristinae		Medina	Medina separata		Jaakko L.O. Pohjoismaeki	jaakkop@uef.fi
JP00512	Arthropoda	Insecta	Diptera	Tachinidae	Exoristinae		Medina	Medina collaris		Jaakko L.O. Pohjoismaeki	jaakkop@uef.fi
JP00513	Arthropoda	Insecta	Diptera	Tachinidae	Exoristinae		Medina			Jaakko L.O. Pohjoismaeki	jaakkop@uef.fi		sp. nr. collaris
JP00514	Arthropoda	Insecta	Diptera	Tachinidae	Exoristinae		Medina	Medina separata		Jaakko L.O. Pohjoismaeki	jaakkop@uef.fi
JP00515	Arthropoda	Insecta	Diptera	Tachinidae	Exoristinae		Zaira	Zaira cinerea		Jaakko L.O. Pohjoismaeki	jaakkop@uef.fi
JP00516	Arthropoda	Insecta	Diptera	Tachinidae	Exoristinae		Zaira	Zaira cinerea		Jaakko L.O. Pohjoismaeki	jaakkop@uef.fi
JP00517	Arthropoda	Insecta	Diptera	Tachinidae	Exoristinae		Bessa	Bessa selecta		Jaakko L.O. Pohjoismaeki	jaakkop@uef.fi
JP00518	Arthropoda	Insecta	Diptera	Tachinidae	Exoristinae		Winthemia	Winthemia cruentata		Jaakko L.O. Pohjoismaeki	jaakkop@uef.fi
JP00519	Arthropoda	Insecta	Diptera	Tachinidae	Exoristinae		Winthemia	Winthemia cruentata		Jaakko L.O. Pohjoismaeki	jaakkop@uef.fi
JP00520	Arthropoda	Insecta	Diptera	Tachinidae	Exoristinae		Admontia	Admontia blanda		Jaakko L.O. Pohjoismaeki	jaakkop@uef.fi
JP00521	Arthropoda	Insecta	Diptera	Tachinidae	Exoristinae		Admontia	Admontia blanda		Jaakko L.O. Pohjoismaeki	jaakkop@uef.fi
JP00522	Arthropoda	Insecta	Diptera	Tachinidae	Exoristinae		Admontia	Admontia grandicornis		Jaakko L.O. Pohjoismaeki	jaakkop@uef.fi
JP00523	Arthropoda	Insecta	Diptera	Tachinidae	Exoristinae		Blondelia	Blondelia nigripes		Jaakko L.O. Pohjoismaeki	jaakkop@uef.fi
JP00524	Arthropoda	Insecta	Diptera	Tachinidae	Exoristinae		Meigenia	Meigenia dorsalis		Jaakko L.O. Pohjoismaeki	jaakkop@uef.fi
JP00525	Arthropoda	Insecta	Diptera	Tachinidae	Exoristinae		Compsilura	Compsilura concinnata		Jaakko L.O. Pohjoismaeki	jaakkop@uef.fi
JP00526	Arthropoda	Insecta	Diptera	Tachinidae	Exoristinae		Myxexoristops	Myxexoristops abietis		Jaakko L.O. Pohjoismaeki	jaakkop@uef.fi
JP00527	Arthropoda	Insecta	Diptera	Tachinidae	Exoristinae		Oswaldia	Oswaldia spectabilis		Jaakko L.O. Pohjoismaeki	jaakkop@uef.fi
JP00528	Arthropoda	Insecta	Diptera	Tachinidae	Exoristinae		Oswaldia	Oswaldia muscaria		Jaakko L.O. Pohjoismaeki	jaakkop@uef.fi
JP00529	Arthropoda	Insecta	Diptera	Tachinidae	Exoristinae		Oswaldia	Oswaldia muscaria		Jaakko L.O. Pohjoismaeki	jaakkop@uef.fi
JP00530	Arthropoda	Insecta	Diptera	Tachinidae	Exoristinae		Oswaldia	Oswaldia muscaria		Jaakko L.O. Pohjoismaeki	jaakkop@uef.fi
JP00531	Arthropoda	Insecta	Diptera	Tachinidae	Exoristinae		Nemorilla	Nemorilla maculosa		T. Zeegers
JP00532	Arthropoda	Insecta	Diptera	Tachinidae	Exoristinae		Nemorilla	Nemorilla maculosa		T. Zeegers
JP00533	Arthropoda	Insecta	Diptera	Tachinidae	Exoristinae		Nemorilla	Nemorilla maculosa		Jaakko L.O. Pohjoismaeki	jaakkop@uef.fi
JP00534	Arthropoda	Insecta	Diptera	Tachinidae	Exoristinae		Smidtia	Smidtia amoena		Jaakko L.O. Pohjoismaeki	jaakkop@uef.fi
JP00535	Arthropoda	Insecta	Diptera	Tachinidae	Exoristinae		Smidtia	Smidtia amoena		Jaakko L.O. Pohjoismaeki	jaakkop@uef.fi
JP00536	Arthropoda	Insecta	Diptera	Tachinidae	Exoristinae		Tlephusa	Tlephusa cincinna		Jaakko L.O. Pohjoismaeki	jaakkop@uef.fi
JP00537	Arthropoda	Insecta	Diptera	Tachinidae	Exoristinae		Bactromyia	Bactromyia aurulenta		Christer Bergstroem
JP00538	Arthropoda	Insecta	Diptera	Tachinidae	Exoristinae		Bactromyia	Bactromyia aurulenta		Jaakko L.O. Pohjoismaeki	jaakkop@uef.fi
JP00539	Arthropoda	Insecta	Diptera	Tachinidae	Exoristinae		Phebellia	Phebellia stulta		Christer Bergstroem
JP00540	Arthropoda	Insecta	Diptera	Tachinidae	Exoristinae		Phebellia	Phebellia stulta		Jaakko L.O. Pohjoismaeki	jaakkop@uef.fi
JP00541	Arthropoda	Insecta	Diptera	Tachinidae	Exoristinae		Phebellia	Phebellia glaucoides		Jaakko L.O. Pohjoismaeki	jaakkop@uef.fi
JP00542	Arthropoda	Insecta	Diptera	Tachinidae	Exoristinae		Nilea	Nilea hortulana		Jaakko L.O. Pohjoismaeki	jaakkop@uef.fi
JP00543	Arthropoda	Insecta	Diptera	Tachinidae	Exoristinae		Nilea	Nilea hortulana		Jaakko L.O. Pohjoismaeki	jaakkop@uef.fi
JP00544	Arthropoda	Insecta	Diptera	Tachinidae	Exoristinae		Nilea	Nilea hortulana		Jaakko L.O. Pohjoismaeki	jaakkop@uef.fi
JP00545	Arthropoda	Insecta	Diptera	Tachinidae	Exoristinae		Nilea	Nilea innoxia		Jaakko L.O. Pohjoismaeki	jaakkop@uef.fi
JP00546	Arthropoda	Insecta	Diptera	Tachinidae	Exoristinae		Nilea	Nilea innoxia		Jaakko L.O. Pohjoismaeki	jaakkop@uef.fi
JP00547	Arthropoda	Insecta	Diptera	Tachinidae	Exoristinae		Nilea	Nilea rufiscutellaris		Christer Bergstroem
JP00548	Arthropoda	Insecta	Diptera	Tachinidae	Exoristinae		Nilea	Nilea rufiscutellaris		Jaakko L.O. Pohjoismaeki	jaakkop@uef.fi
JP00549	Arthropoda	Insecta	Diptera	Tachinidae	Exoristinae		Nilea	Nilea rufiscutellaris		Jaakko L.O. Pohjoismaeki	jaakkop@uef.fi
JP00550	Arthropoda	Insecta	Diptera	Tachinidae	Exoristinae		Phryxe	Phryxe magnicornis		Jaakko L.O. Pohjoismaeki	jaakkop@uef.fi
JP00551	Arthropoda	Insecta	Diptera	Tachinidae	Exoristinae		Phryxe	Phryxe erythrostoma		Jaakko L.O. Pohjoismaeki	jaakkop@uef.fi
JP00552	Arthropoda	Insecta	Diptera	Tachinidae	Exoristinae		Phryxe	Phryxe erythrostoma		Jaakko L.O. Pohjoismaeki	jaakkop@uef.fi
JP00553	Arthropoda	Insecta	Diptera	Tachinidae	Goniinae		Lydella	Lydella grisescens		T. Zeegers
JP00554	Arthropoda	Insecta	Diptera	Tachinidae	Goniinae		Lydella	Lydella ripae		Christer Bergstroem
JP00555	Arthropoda	Insecta	Diptera	Tachinidae	Goniinae		Lydella	Lydella stabulans		Christer Bergstroem
JP00556	Arthropoda	Insecta	Diptera	Tachinidae	Exoristinae		Belida	Belida angelicae		Jaakko L.O. Pohjoismaeki	jaakkop@uef.fi
JP00557	Arthropoda	Insecta	Diptera	Tachinidae	Goniinae		Lydella	Lydella stabulans		Jaakko L.O. Pohjoismaeki	jaakkop@uef.fi
JP00558	Arthropoda	Insecta	Diptera	Tachinidae	Goniinae		Lydella	Lydella stabulans		Jaakko L.O. Pohjoismaeki	jaakkop@uef.fi
JP00559	Arthropoda	Insecta	Diptera	Tachinidae	Exoristinae		Platymya	Platymya fimbriata		Antti Haarto	ahaarto@gmail.com
JP00560	Arthropoda	Insecta	Diptera	Tachinidae	Exoristinae		Platymya	Platymya fimbriata		Jaakko L.O. Pohjoismaeki	jaakkop@uef.fi
JP00561	Arthropoda	Insecta	Diptera	Tachinidae	Exoristinae		Platymya	Platymya fimbriata		Jaakko L.O. Pohjoismaeki	jaakkop@uef.fi
JP00562	Arthropoda	Insecta	Diptera	Tachinidae	Exoristinae		Platymya	Platymya fimbriata		Jaakko L.O. Pohjoismaeki	jaakkop@uef.fi
JP00563	Arthropoda	Insecta	Diptera	Tachinidae	Exoristinae		Elodia	Elodia ambulatoria		Jaakko L.O. Pohjoismaeki	jaakkop@uef.fi
JP00564	Arthropoda	Insecta	Diptera	Tachinidae	Exoristinae		Elodia	Elodia ambulatoria		Jaakko L.O. Pohjoismaeki	jaakkop@uef.fi
JP00565	Arthropoda	Insecta	Diptera	Tachinidae	Exoristinae		Brachicheta	Brachicheta strigata		Jaakko L.O. Pohjoismaeki	jaakkop@uef.fi
JP00566	Arthropoda	Insecta	Diptera	Tachinidae	Exoristinae		Eumea	Eumea linearicornis		Jaakko L.O. Pohjoismaeki	jaakkop@uef.fi
JP00567	Arthropoda	Insecta	Diptera	Tachinidae	Exoristinae		Eumea	Eumea mitis		Jaakko L.O. Pohjoismaeki	jaakkop@uef.fi
JP00568	Arthropoda	Insecta	Diptera	Tachinidae	Exoristinae		Platymya	Platymya fimbriata		Jaakko L.O. Pohjoismaeki	jaakkop@uef.fi
JP00569	Arthropoda	Insecta	Diptera	Tachinidae	Exoristinae		Cyzenis	Cyzenis jucunda		Jaakko L.O. Pohjoismaeki	jaakkop@uef.fi
JP00570	Arthropoda	Insecta	Diptera	Tachinidae	Exoristinae		Cyzenis	Cyzenis jucunda		Christer Bergstroem
JP00571	Arthropoda	Insecta	Diptera	Tachinidae	Exoristinae		Cyzenis	Cyzenis jucunda		Jaakko L.O. Pohjoismaeki	jaakkop@uef.fi
JP00572	Arthropoda	Insecta	Diptera	Tachinidae	Exoristinae		Botria	Botria subalpina		Christer Bergstroem
JP00573	Arthropoda	Insecta	Diptera	Tachinidae	Exoristinae		Botria	Botria subalpina		Jaakko L.O. Pohjoismaeki	jaakkop@uef.fi
JP00574	Arthropoda	Insecta	Diptera	Tachinidae	Exoristinae		Allophorocera	Allophorocera ferruginea		Jaakko L.O. Pohjoismaeki	jaakkop@uef.fi
JP00575	Arthropoda	Insecta	Diptera	Tachinidae	Exoristinae		Zenillia	Zenillia nr. dolosa		T. Zeegers
JP00576	Arthropoda	Insecta	Diptera	Tachinidae	Exoristinae		Frontina	Frontina laeta		Jaakko L.O. Pohjoismaeki	jaakkop@uef.fi
JP00577	Arthropoda	Insecta	Diptera	Tachinidae	Tachininae		Peleteria	Peleteria rubescens		Jaakko L.O. Pohjoismaeki	jaakkop@uef.fi
JP00578	Arthropoda	Insecta	Diptera	Tachinidae	Tachininae		Peleteria	Peleteria varia		Jaakko L.O. Pohjoismaeki	jaakkop@uef.fi
JP00579	Arthropoda	Insecta	Diptera	Tachinidae	Tachininae		Peleteria	Peleteria varia		Jaakko L.O. Pohjoismaeki	jaakkop@uef.fi
JP00580	Arthropoda	Insecta	Diptera	Tachinidae	Tachininae		Peleteria	Peleteria varia		Jaakko L.O. Pohjoismaeki	jaakkop@uef.fi
JP00581	Arthropoda	Insecta	Diptera	Tachinidae	Tachininae		Nowickia	Nowickia marklini		Jaakko L.O. Pohjoismaeki	jaakkop@uef.fi
JP00582	Arthropoda	Insecta	Diptera	Tachinidae	Tachininae		Nowickia	Nowickia alpina		Christer Bergstroem
JP00583	Arthropoda	Insecta	Diptera	Tachinidae	Tachininae		Nowickia	Nowickia alpina		Christer Bergstroem
JP00584	Arthropoda	Insecta	Diptera	Tachinidae	Tachininae		Tachina	Tachina nr. magnicornis		Jaakko L.O. Pohjoismaeki	jaakkop@uef.fi
JP00585	Arthropoda	Insecta	Diptera	Tachinidae	Tachininae		Tachina	Tachina fera		Jaakko L.O. Pohjoismaeki	jaakkop@uef.fi
JP00586	Arthropoda	Insecta	Diptera	Tachinidae	Tachininae		Tachina	Tachina nr. magnicornis		Jaakko L.O. Pohjoismaeki	jaakkop@uef.fi
JP00587	Arthropoda	Insecta	Diptera	Tachinidae	Tachininae		Lypha	Lypha dubia		Jaakko L.O. Pohjoismaeki	jaakkop@uef.fi
JP00588	Arthropoda	Insecta	Diptera	Tachinidae	Tachininae		Eurithia	Eurithia anthophila		Jaakko L.O. Pohjoismaeki	jaakkop@uef.fi
JP00589	Arthropoda	Insecta	Diptera	Tachinidae	Tachininae		Panzeria	Panzeria rudis		Jaakko L.O. Pohjoismaeki	jaakkop@uef.fi
JP00590	Arthropoda	Insecta	Diptera	Tachinidae	Tachininae		Panzeria	Panzeria rudis		Jaakko L.O. Pohjoismaeki	jaakkop@uef.fi
JP00591	Arthropoda	Insecta	Diptera	Tachinidae	Tachininae		Panzeria	Panzeria rudis		Jaakko L.O. Pohjoismaeki	jaakkop@uef.fi
JP00592	Arthropoda	Insecta	Diptera	Tachinidae	Tachininae		Appendicia	Appendicia truncata		Jaakko L.O. Pohjoismaeki	jaakkop@uef.fi
JP00593	Arthropoda	Insecta	Diptera	Tachinidae	Tachininae		Eurithia	Eurithia consobrina		Jaakko L.O. Pohjoismaeki	jaakkop@uef.fi
JP00594	Arthropoda	Insecta	Diptera	Tachinidae	Tachininae		Eurithia	Eurithia connivens		Jaakko L.O. Pohjoismaeki	jaakkop@uef.fi
JP00595	Arthropoda	Insecta	Diptera	Tachinidae	Tachininae		Eurithia	Eurithia connivens		Jaakko L.O. Pohjoismaeki	jaakkop@uef.fi
JP00401	Arthropoda	Insecta	Diptera	Tachinidae	Phasiinae		Brullaea	Brullaea ocypteroidea		Hans-Peter Tschorsnig	hanspeter.tschorsnig@smns-bw.de
JP00402	Arthropoda	Insecta	Diptera	Tachinidae	Tachininae		Strongygaster	Strongygaster celer		Hans-Peter Tschorsnig	hanspeter.tschorsnig@smns-bw.de
JP00403	Arthropoda	Insecta	Diptera	Tachinidae	Tachininae		Acemya	Acemya acuticornis		Hans-Peter Tschorsnig	hanspeter.tschorsnig@smns-bw.de
JP00404	Arthropoda	Insecta	Diptera	Tachinidae	Tachininae		Acemya	Acemya rufitibia		Jaakko L.O. Pohjoismaeki	jaakkop@uef.fi
JP00405	Arthropoda	Insecta	Diptera	Tachinidae	Exoristinae		Carcelia	Carcelia tibialis		Hans-Peter Tschorsnig	hanspeter.tschorsnig@smns-bw.de
JP00406	Arthropoda	Insecta	Diptera	Tachinidae	Exoristinae		Clemelis	Clemelis pullata		Hans-Peter Tschorsnig	hanspeter.tschorsnig@smns-bw.de
JP00407	Arthropoda	Insecta	Diptera	Tachinidae	Exoristinae		Erynnia	Erynnia ocypterata		Hans-Peter Tschorsnig	hanspeter.tschorsnig@smns-bw.de
JP00408	Arthropoda	Insecta	Diptera	Tachinidae	Exoristinae		Gonia	Gonia capitata		Hans-Peter Tschorsnig	hanspeter.tschorsnig@smns-bw.de
JP00409	Arthropoda	Insecta	Diptera	Tachinidae	Exoristinae		Hebia	Hebia flavipes		Hans-Peter Tschorsnig	hanspeter.tschorsnig@smns-bw.de
JP00410	Arthropoda	Insecta	Diptera	Tachinidae	Exoristinae		Masicera	Masicera silvatica		Hans-Peter Tschorsnig	hanspeter.tschorsnig@smns-bw.de
JP00411	Arthropoda	Insecta	Diptera	Tachinidae	Exoristinae		Periarchiclops	Periarchiclops scutellaris		Hans-Peter Tschorsnig	hanspeter.tschorsnig@smns-bw.de
JP00412	Arthropoda	Insecta	Diptera	Tachinidae	Exoristinae		Phryxe	Phryxe nemea		Hans-Peter Tschorsnig	hanspeter.tschorsnig@smns-bw.de
JP00413	Arthropoda	Insecta	Diptera	Tachinidae	Goniinae		Pseudoperichaeta	Pseudoperichaeta palesoidea		Hans-Peter Tschorsnig	hanspeter.tschorsnig@smns-bw.de
JP00414	Arthropoda	Insecta	Diptera	Tachinidae	Exoristinae		Smidtia	Smidtia conspersa		Hans-Peter Tschorsnig	hanspeter.tschorsnig@smns-bw.de
JP00415	Arthropoda	Insecta	Diptera	Tachinidae	Exoristinae		Spallanzania	Spallanzania hebes		Hans-Peter Tschorsnig	hanspeter.tschorsnig@smns-bw.de
JP00416	Arthropoda	Insecta	Diptera	Tachinidae	Exoristinae		Sturmia	Sturmia bella		Hans-Peter Tschorsnig	hanspeter.tschorsnig@smns-bw.de
JP00417	Arthropoda	Insecta	Diptera	Tachinidae	Exoristinae		Thelymorpha	Thelymorpha marmorata		Hans-Peter Tschorsnig	hanspeter.tschorsnig@smns-bw.de
JP00418	Arthropoda	Insecta	Diptera	Tachinidae	Tachininae		Actia	Actia infantula		Hans-Peter Tschorsnig	hanspeter.tschorsnig@smns-bw.de
JP00419	Arthropoda	Insecta	Diptera	Tachinidae	Tachininae		Actia	Actia maksymovi		Hans-Peter Tschorsnig	hanspeter.tschorsnig@smns-bw.de
JP00420	Arthropoda	Insecta	Diptera	Tachinidae	Tachininae		Entomophaga	Entomophaga nigrohalterata		Hans-Peter Tschorsnig	hanspeter.tschorsnig@smns-bw.de
JP00421	Arthropoda	Insecta	Diptera	Tachinidae	Tachininae		Eurithia	Eurithia caesia		Hans-Peter Tschorsnig	hanspeter.tschorsnig@smns-bw.de
JP00422	Arthropoda	Insecta	Diptera	Tachinidae	Tachininae		Eurithia	Eurithia vivida		Hans-Peter Tschorsnig	hanspeter.tschorsnig@smns-bw.de
JP00423	Arthropoda	Insecta	Diptera	Tachinidae	Tachininae		Linnaemya	Linnaemya olsufjevi		Hans-Peter Tschorsnig	hanspeter.tschorsnig@smns-bw.de
JP00424	Arthropoda	Insecta	Diptera	Tachinidae	Tachininae		Nemoraea	Nemoraea pellucida		Hans-Peter Tschorsnig	hanspeter.tschorsnig@smns-bw.de
JP00425	Arthropoda	Insecta	Diptera	Tachinidae	Tachininae		Nowickia	Nowickia ferox		Hans-Peter Tschorsnig	hanspeter.tschorsnig@smns-bw.de
JP00426	Arthropoda	Insecta	Diptera	Tachinidae	Dexiinae		Dexia	Dexia rustica		Hans-Peter Tschorsnig	hanspeter.tschorsnig@smns-bw.de
JP00427	Arthropoda	Insecta	Diptera	Tachinidae	Dexiinae		Eriothrix	Eriothrix prolixa		Hans-Peter Tschorsnig	hanspeter.tschorsnig@smns-bw.de
JP00428	Arthropoda	Insecta	Diptera	Tachinidae	Dexiinae		Estheria	Estheria petiolata		Hans-Peter Tschorsnig	hanspeter.tschorsnig@smns-bw.de
JP00429	Arthropoda	Insecta	Diptera	Tachinidae	Dexiinae		Periscepsia	Periscepsia carbonaria		Hans-Peter Tschorsnig	hanspeter.tschorsnig@smns-bw.de
JP00430	Arthropoda	Insecta	Diptera	Tachinidae	Phasiinae		Clytiomya			Jaakko L.O. Pohjoismaeki	jaakkop@uef.fi
JP00431	Arthropoda	Insecta	Diptera	Tachinidae	Phasiinae		Phasia	Phasia obesa		Jaakko L.O. Pohjoismaeki	jaakkop@uef.fi
JP00432	Arthropoda	Insecta	Diptera	Tachinidae	Phasiinae		Phasia	Phasia obesa		Jaakko L.O. Pohjoismaeki	jaakkop@uef.fi
JP00433	Arthropoda	Insecta	Diptera	Tachinidae	Exoristinae		Meigenia	Meigenia majuscula		Jaakko L.O. Pohjoismaeki	jaakkop@uef.fi
JP00434	Arthropoda	Insecta	Diptera	Tachinidae	Tachininae		Tachina	Tachina nupta		Jaakko L.O. Pohjoismaeki	jaakkop@uef.fi
JP00435	Arthropoda	Insecta	Diptera	Tachinidae	Tachininae		Loewia	Loewia adjuncta		Jaakko L.O. Pohjoismaeki	jaakkop@uef.fi
JP00436	Arthropoda	Insecta	Diptera	Tachinidae	Tachininae		Synactia	Synactia parvula		Jaakko L.O. Pohjoismaeki	jaakkop@uef.fi
JP00437	Arthropoda	Insecta	Diptera	Tachinidae	Phasiinae		Hemyda	Hemyda vittata		Jaakko L.O. Pohjoismaeki	jaakkop@uef.fi
JP00438	Arthropoda	Insecta	Diptera	Tachinidae	Phasiinae		Hemyda	Hemyda obscuripennis		Jaakko L.O. Pohjoismaeki	jaakkop@uef.fi
JP00439	Arthropoda	Insecta	Diptera	Tachinidae	Tachininae		Synactia	Synactia parvula		Jaakko L.O. Pohjoismaeki	jaakkop@uef.fi
JP00440	Arthropoda	Insecta	Diptera	Tachinidae	Exoristinae		Paracraspedothrix	Paracraspedothrix montivaga		Jaakko L.O. Pohjoismaeki	jaakkop@uef.fi
JP00441	Arthropoda	Insecta	Diptera	Tachinidae	Phasiinae		Lophosia	Lophosia fasciata		Jaakko L.O. Pohjoismaeki	jaakkop@uef.fi
JP00442	Arthropoda	Insecta	Diptera	Tachinidae	Phasiinae		Gymnosoma	Gymnosoma dolycoridis		Jaakko L.O. Pohjoismaeki	jaakkop@uef.fi
JP00443	Arthropoda	Insecta	Diptera	Tachinidae	Phasiinae		Gymnosoma	Gymnosoma dolycoridis		Jaakko L.O. Pohjoismaeki	jaakkop@uef.fi
JP00444	Arthropoda	Insecta	Diptera	Tachinidae	Exoristinae		Blondelia	Blondelia nigripes		Jaakko L.O. Pohjoismaeki	jaakkop@uef.fi
JP00446	Arthropoda	Insecta	Diptera	Tachinidae	Tachininae		Lypha	Lypha dubia		Jaakko L.O. Pohjoismaeki	jaakkop@uef.fi
JP00447	Arthropoda	Insecta	Diptera	Tachinidae	Exoristinae		Medina	Medina luctuosa		Jaakko L.O. Pohjoismaeki	jaakkop@uef.fi
JP00448	Arthropoda	Insecta	Diptera	Tachinidae	Exoristinae		Medina	Medina luctuosa		Jaakko L.O. Pohjoismaeki	jaakkop@uef.fi
JP00449	Arthropoda	Insecta	Diptera	Tachinidae	Exoristinae		Blondelia	Blondelia nigripes		Jaakko L.O. Pohjoismaeki	jaakkop@uef.fi
JP00450	Arthropoda	Insecta	Diptera	Tachinidae	Exoristinae		Epicampocera	Epicampocera succincta		Jaakko L.O. Pohjoismaeki	jaakkop@uef.fi
JP00451	Arthropoda	Insecta	Diptera	Tachinidae	Tachininae		Actia	Actia pilipennis		Jaakko L.O. Pohjoismaeki	jaakkop@uef.fi
JP00452	Arthropoda	Insecta	Diptera	Tachinidae	Tachininae		Actia	Actia nigroscutellata		Jaakko L.O. Pohjoismaeki	jaakkop@uef.fi
JP00453	Arthropoda	Insecta	Diptera	Tachinidae	Tachininae		Actia	Actia lamia		Jaakko L.O. Pohjoismaeki	jaakkop@uef.fi
JP00454	Arthropoda	Insecta	Diptera	Tachinidae	Dexiinae		Blepharomyia	Blepharomyia angustifrons		Jaakko L.O. Pohjoismaeki	jaakkop@uef.fi
JP00455	Arthropoda	Insecta	Diptera	Tachinidae	Exoristinae		Diplostichus	Diplostichus janitrix		Jaakko L.O. Pohjoismaeki	jaakkop@uef.fi
JP00456	Arthropoda	Insecta	Diptera	Tachinidae	Exoristinae		Aplomya	Aplomya confinis		Jaakko L.O. Pohjoismaeki	jaakkop@uef.fi
JP00457	Arthropoda	Insecta	Diptera	Tachinidae	Exoristinae		Paratryphera	Paratryphera barbatula		Jaakko L.O. Pohjoismaeki	jaakkop@uef.fi
JP00458	Arthropoda	Insecta	Diptera	Tachinidae	Exoristinae		Phebellia	Phebellia pauciseta		Jaakko L.O. Pohjoismaeki	jaakkop@uef.fi
JP00459	Arthropoda	Insecta	Diptera	Tachinidae	Exoristinae		Phebellia	Phebellia pauciseta		Jaakko L.O. Pohjoismaeki	jaakkop@uef.fi
JP00460	Arthropoda	Insecta	Diptera	Tachinidae	Dexiinae		Athrycia	Athrycia trepida		Jaakko L.O. Pohjoismaeki	jaakkop@uef.fi
JP00461	Arthropoda	Insecta	Diptera	Tachinidae	Tachininae		Tachina	Tachina fera		Jaakko L.O. Pohjoismaeki	jaakkop@uef.fi
JP00462	Arthropoda	Insecta	Diptera	Tachinidae	Tachininae		Tachina	Tachina nr. magnicornis		Jaakko L.O. Pohjoismaeki	jaakkop@uef.fi
JP00463	Arthropoda	Insecta	Diptera	Tachinidae	Tachininae		Eurithia	Eurithia anthophila		Jaakko L.O. Pohjoismaeki	jaakkop@uef.fi
JP00464	Arthropoda	Insecta	Diptera	Tachinidae	Tachininae		Eurithia	Eurithia connivens		Jaakko L.O. Pohjoismaeki	jaakkop@uef.fi
JP00465	Arthropoda	Insecta	Diptera	Tachinidae	Exoristinae		Gonia	Gonia divisa		Jaakko L.O. Pohjoismaeki	jaakkop@uef.fi
JP00466	Arthropoda	Insecta	Diptera	Tachinidae	Exoristinae		Gonia	Gonia divisa		Jaakko L.O. Pohjoismaeki	jaakkop@uef.fi
JP00467	Arthropoda	Insecta	Diptera	Tachinidae	Exoristinae		Gonia	Gonia ornata		Jaakko L.O. Pohjoismaeki	jaakkop@uef.fi
JP00468	Arthropoda	Insecta	Diptera	Tachinidae	Exoristinae		Gonia	Gonia picea		Jaakko L.O. Pohjoismaeki	jaakkop@uef.fi
JP00469	Arthropoda	Insecta	Diptera	Tachinidae	Tachininae		Linnaemya	Linnaemya vulpina		Jaakko L.O. Pohjoismaeki	jaakkop@uef.fi
JP00470	Arthropoda	Insecta	Diptera	Tachinidae	Dexiinae		Eriothrix	Eriothrix rufomaculatus		Jaakko L.O. Pohjoismaeki	jaakkop@uef.fi
JP00471	Arthropoda	Insecta	Diptera	Tachinidae	Exoristinae		Istocheta	Istocheta longicornis		Hans-Peter Tschorsnig	hanspeter.tschorsnig@smns-bw.de
JP00472	Arthropoda	Insecta	Diptera	Tachinidae	Exoristinae		Winthemia	Winthemia erythura		Hans-Peter Tschorsnig	hanspeter.tschorsnig@smns-bw.de
JP00473	Arthropoda	Insecta	Diptera	Tachinidae	Dexiinae		Billaea	Billaea fortis		Hans-Peter Tschorsnig	hanspeter.tschorsnig@smns-bw.de
JP00474	Arthropoda	Insecta	Diptera	Tachinidae	Exoristinae		Policheta	Policheta unicolor		Hans-Peter Tschorsnig	hanspeter.tschorsnig@smns-bw.de
JP00475	Arthropoda	Insecta	Diptera	Tachinidae	Tachininae		Macquartia	Macquartia viridana		Hans-Peter Tschorsnig	hanspeter.tschorsnig@smns-bw.de
JP00476	Arthropoda	Insecta	Diptera	Tachinidae	Dexiinae		Peteina	Peteina erinaceus		Hans-Peter Tschorsnig	hanspeter.tschorsnig@smns-bw.de
JP00477	Arthropoda	Insecta	Diptera	Tachinidae	Dexiinae		Rondania	Rondania dispar		Hans-Peter Tschorsnig	hanspeter.tschorsnig@smns-bw.de
JP00478	Arthropoda	Insecta	Diptera	Tachinidae	Dexiinae		Dexia	Dexia vacua		Hans-Peter Tschorsnig	hanspeter.tschorsnig@smns-bw.de
JP00479	Arthropoda	Insecta	Diptera	Tachinidae	Tachininae		Eurithia	Eurithia intermedia		Hans-Peter Tschorsnig	hanspeter.tschorsnig@smns-bw.de
JP00480	Arthropoda	Insecta	Diptera	Tachinidae	Tachininae		Peleteria	Peleteria ferina		Hans-Peter Tschorsnig	hanspeter.tschorsnig@smns-bw.de
JP00481	Arthropoda	Insecta	Diptera	Tachinidae	Exoristinae		Myxexoristops	Myxexoristops bonsdorffi		Hans-Peter Tschorsnig	hanspeter.tschorsnig@smns-bw.de
JP00482	Arthropoda	Insecta	Diptera	Tachinidae	Tachininae		Macroprosopa	Macroprosopa atrata		Hans-Peter Tschorsnig	hanspeter.tschorsnig@smns-bw.de
JP00483	Arthropoda	Insecta	Diptera	Tachinidae	Tachininae		Linnaemya	Linnaemya haemorrhoidalis		Hans-Peter Tschorsnig	hanspeter.tschorsnig@smns-bw.de
JP00484	Arthropoda	Insecta	Diptera	Tachinidae	Exoristinae		Senometopia	Senometopia separata		Hans-Peter Tschorsnig	hanspeter.tschorsnig@smns-bw.de
JP00485	Arthropoda	Insecta	Diptera	Tachinidae	Exoristinae		Admontia	Admontia seria		Hans-Peter Tschorsnig	hanspeter.tschorsnig@smns-bw.de
JP00486	Arthropoda	Insecta	Diptera	Tachinidae	Dexiinae		Stomina	Stomina tachinoides		Hans-Peter Tschorsnig	hanspeter.tschorsnig@smns-bw.de
JP00487	Arthropoda	Insecta	Diptera	Tachinidae	Tachininae		Cleonice	Cleonice keteli		Hans-Peter Tschorsnig	hanspeter.tschorsnig@smns-bw.de
JP00488	Arthropoda	Insecta	Diptera	Tachinidae	Dexiinae		Chaetovoria	Chaetovoria antennata		Hans-Peter Tschorsnig	hanspeter.tschorsnig@smns-bw.de
JP00489	Arthropoda	Insecta	Diptera	Tachinidae	Tachininae		Aphria	Aphria longilingua		Hans-Peter Tschorsnig	hanspeter.tschorsnig@smns-bw.de
JP00490	Arthropoda	Insecta	Diptera	Tachinidae	Dexiinae		Eriothrix	Eriothrix argyreatus		Hans-Peter Tschorsnig	hanspeter.tschorsnig@smns-bw.de
JP00491	Arthropoda	Insecta	Diptera	Tachinidae	Tachininae		Linnaemya	Linnaemya rossica		Hans-Peter Tschorsnig	hanspeter.tschorsnig@smns-bw.de
JP00492	Arthropoda	Insecta	Diptera	Tachinidae	Exoristinae		Drino	Drino gilva		Hans-Peter Tschorsnig	hanspeter.tschorsnig@smns-bw.de
JP00493	Arthropoda	Insecta	Diptera	Tachinidae	Exoristinae		Paratryphera	Paratryphera bisetosa		Hans-Peter Tschorsnig	hanspeter.tschorsnig@smns-bw.de
JP00494	Arthropoda	Insecta	Diptera	Tachinidae	Exoristinae		Senometopia	Senometopia intermedia		Hans-Peter Tschorsnig	hanspeter.tschorsnig@smns-bw.de
JP00495	Arthropoda	Insecta	Diptera	Tachinidae	Tachininae		Germaria	Germaria ruficeps		Hans-Peter Tschorsnig	hanspeter.tschorsnig@smns-bw.de
ZMUO.003707	Arthropoda	Insecta	Diptera	Tachinidae	Exoristinae		Onychogonia	Onychogonia cervini		Antti Haarto	ahaarto@gmail.com
ZMUO.003708	Arthropoda	Insecta	Diptera	Tachinidae	Exoristinae		Onychogonia	Onychogonia cervini		Antti Haarto	ahaarto@gmail.com
JKo12-00189	Arthropoda	Insecta	Diptera	Tachinidae	Exoristinae		Phorinia	Phorinia aurifrons		Jaakko L.O. Pohjoismaeki	jaakkop@uef.fi
AHa12-001306	Arthropoda	Insecta	Diptera	Tachinidae	Exoristinae		Winthemia	Winthemia erythura		Antti Haarto	ahaarto@gmail.com
KWi-312	Arthropoda	Insecta	Diptera	Tachinidae	Tachininae		Graphogaster	Graphogaster nigrescens		Kaj Winqvist	kwinqvist@hotmail.com
JKA12-1946	Arthropoda	Insecta	Diptera	Tachinidae	Tachininae		Aphantorhaphopsis	Aphantorhaphopsis verralli		J. Flinck	dipterabarcodes@luomus.fi
JKA12-1959	Arthropoda	Insecta	Diptera	Tachinidae	Exoristinae		Hebia	Hebia flavipes		J. Flinck	dipterabarcodes@luomus.fi
JKA12-1960	Arthropoda	Insecta	Diptera	Tachinidae	Exoristinae		Gonia	Gonia ornata		J. Flinck	dipterabarcodes@luomus.fi
JKA12-1961	Arthropoda	Insecta	Diptera	Tachinidae	Tachininae		Demoticus	Demoticus plebejus		J. Flinck	dipterabarcodes@luomus.fi
JKA12-1963	Arthropoda	Insecta	Diptera	Tachinidae	Exoristinae		Smidtia	Smidtia amoena		J. Flinck	dipterabarcodes@luomus.fi
JKA12-1964	Arthropoda	Insecta	Diptera	Tachinidae	Exoristinae		Smidtia	Smidtia amoena		J. Flinck	dipterabarcodes@luomus.fi
JKA12-1965	Arthropoda	Insecta	Diptera	Tachinidae	Exoristinae		Botria	Botria subalpina		J. Flinck	dipterabarcodes@luomus.fi
JKA12-1966	Arthropoda	Insecta	Diptera	Tachinidae	Tachininae		Panzeria	Panzeria puparum		J. Flinck	dipterabarcodes@luomus.fi
JKA12-1968	Arthropoda	Insecta	Diptera	Tachinidae	Tachininae		Macquartia	Macquartia viridana		J. Flinck	dipterabarcodes@luomus.fi
JKA12-1969	Arthropoda	Insecta	Diptera	Tachinidae	Exoristinae		Cyzenis	Cyzenis jucunda		J. Flinck	dipterabarcodes@luomus.fi
JKA12-1971	Arthropoda	Insecta	Diptera	Tachinidae	Exoristinae		Gonia	Gonia picea		J. Flinck	dipterabarcodes@luomus.fi
JKA12-1972	Arthropoda	Insecta	Diptera	Tachinidae	Exoristinae		Gonia	Gonia divisa		J. Flinck	dipterabarcodes@luomus.fi
MZH_HP.1491	Arthropoda	Insecta	Diptera	Tachinidae	Exoristinae		Bactromyia	Bactromyia aurulenta		Jere Kahanpaa	jere.kahanpaa@helsinki.fi
MZH_HP.1517	Arthropoda	Insecta	Diptera	Tachinidae	Tachininae		Gymnocheta	Gymnocheta viridis		Jere Kahanpaa	jere.kahanpaa@helsinki.fi
MZH_HP.1998	Arthropoda	Insecta	Diptera	Tachinidae	Tachininae		Nowickia	Nowickia marklini		J. Flinck	dipterabarcodes@luomus.fi		Previous ID: Nowickia marklini
MZH_HP.1999	Arthropoda	Insecta	Diptera	Tachinidae	Tachininae		Nowickia	Nowickia marklini		J. Flinck	dipterabarcodes@luomus.fi		Previous ID: Nowickia marklini
MZH_HP.2003	Arthropoda	Insecta	Diptera	Tachinidae	Exoristinae		Allophorocera	Allophorocera lapponica		J. Flinck	dipterabarcodes@luomus.fi
JP00801	Arthropoda	Insecta	Diptera	Tachinidae	Dexiinae		Dinera	Dinera carinifrons		J. Ziegler
JP00802	Arthropoda	Insecta	Diptera	Tachinidae	Dexiinae		Dinera	Dinera carinifrons		J. Ziegler
JP00803	Arthropoda	Insecta	Diptera	Tachinidae	Tachininae		Macquartia	Macquartia tessellatum		J. Ziegler
JP00804	Arthropoda	Insecta	Diptera	Tachinidae	Dexiinae		Dinera	Dinera nr. fuscata		J. Ziegler
JP00805	Arthropoda	Insecta	Diptera	Tachinidae	Dexiinae		Dinera	Dinera nr. fuscata		J. Ziegler
JP00806	Arthropoda	Insecta	Diptera	Tachinidae	Dexiinae		Dinera	Dinera ferina		J. Ziegler
JP00807	Arthropoda	Insecta	Diptera	Tachinidae	Dexiinae		Dinera	Dinera nr. fuscata		J. Ziegler
JP00808	Arthropoda	Insecta	Diptera	Tachinidae	Dexiinae		Dinera	Dinera nr. fuscata		J. Ziegler
JP00809	Arthropoda	Insecta	Diptera	Tachinidae	Exoristinae		Phebellia	Phebellia glauca		Jaakko L.O. Pohjoismaeki	jaakkop@uef.fi
JP00810	Arthropoda	Insecta	Diptera	Tachinidae	Exoristinae		Oswaldia	Oswaldia reducta		Jaakko L.O. Pohjoismaeki	jaakkop@uef.fi
JP00811	Arthropoda	Insecta	Diptera	Tachinidae	Tachininae		Anthomyiopsis	Anthomyiopsis nigrisquamata		Jaakko L.O. Pohjoismaeki	jaakkop@uef.fi
JP00812	Arthropoda	Insecta	Diptera	Tachinidae	Exoristinae		Carcelia	Carcelia iliaca		Hans-Peter Tschorsnig	hanspeter.tschorsnig@smns-bw.de
JP00813	Arthropoda	Insecta	Diptera	Tachinidae	Exoristinae		Erynnia	Erynnia ocypterata		Jaakko L.O. Pohjoismaeki	jaakkop@uef.fi
JP00814	Arthropoda	Insecta	Diptera	Tachinidae	Exoristinae		Erynnia	Erynnia ocypterata		Jaakko L.O. Pohjoismaeki	jaakkop@uef.fi
JP00815	Arthropoda	Insecta	Diptera	Tachinidae	Exoristinae		Erynnia	Erynnia ocypterata		Jaakko L.O. Pohjoismaeki	jaakkop@uef.fi
JP00816	Arthropoda	Insecta	Diptera	Tachinidae	Exoristinae		Paracraspedothrix	Paracraspedothrix montivaga		Jaakko L.O. Pohjoismaeki	jaakkop@uef.fi
JP00817	Arthropoda	Insecta	Diptera	Tachinidae	Exoristinae		Carcelia	Carcelia laxifrons		Jaakko L.O. Pohjoismaeki	jaakkop@uef.fi
JP00818	Arthropoda	Insecta	Diptera	Tachinidae	Exoristinae		Carcelia	Carcelia atricosta		Jaakko L.O. Pohjoismaeki	jaakkop@uef.fi
JP00819	Arthropoda	Insecta	Diptera	Tachinidae	Tachininae		Peleteria	Peleteria aenea		Jaakko L.O. Pohjoismaeki	jaakkop@uef.fi
JP00820	Arthropoda	Insecta	Diptera	Tachinidae	Tachininae		Pseudopachystylum	Pseudopachystylum gonioides		Jaakko L.O. Pohjoismaeki	jaakkop@uef.fi
JP00821	Arthropoda	Insecta	Diptera	Tachinidae	Tachininae		Pseudopachystylum	Pseudopachystylum gonioides		Jaakko L.O. Pohjoismaeki	jaakkop@uef.fi
JP00822	Arthropoda	Insecta	Diptera	Tachinidae	Tachininae		Pseudopachystylum	Pseudopachystylum gonioides		Jaakko L.O. Pohjoismaeki	jaakkop@uef.fi
JP00823	Arthropoda	Insecta	Diptera	Tachinidae	Exoristinae		Oswaldia	Oswaldia spectabilis		Jaakko L.O. Pohjoismaeki	jaakkop@uef.fi
JP00824	Arthropoda	Insecta	Diptera	Tachinidae	Exoristinae		Oswaldia	Oswaldia spectabilis		Jaakko L.O. Pohjoismaeki	jaakkop@uef.fi
JP00825	Arthropoda	Insecta	Diptera	Tachinidae	Exoristinae		Oswaldia	Oswaldia spectabilis		Jaakko L.O. Pohjoismaeki	jaakkop@uef.fi
JP00826	Arthropoda	Insecta	Diptera	Tachinidae	Exoristinae		Oswaldia	Oswaldia spectabilis		Jaakko L.O. Pohjoismaeki	jaakkop@uef.fi
JP00827	Arthropoda	Insecta	Diptera	Tachinidae	Exoristinae		Oswaldia	Oswaldia spectabilis		Jaakko L.O. Pohjoismaeki	jaakkop@uef.fi
JP00828	Arthropoda	Insecta	Diptera	Tachinidae	Tachininae		Siphona	Siphona pauciseta		Jaakko L.O. Pohjoismaeki	jaakkop@uef.fi
JP00829	Arthropoda	Insecta	Diptera	Tachinidae	Tachininae		Siphona	Siphona pauciseta		Jaakko L.O. Pohjoismaeki	jaakkop@uef.fi
JP00830	Arthropoda	Insecta	Diptera	Tachinidae	Tachininae		Siphona	Siphona pauciseta		Jaakko L.O. Pohjoismaeki	jaakkop@uef.fi
JP00831	Arthropoda	Insecta	Diptera	Tachinidae	Tachininae		Germaria	Germaria angustata		S. Downes
JP00832	Arthropoda	Insecta	Diptera	Tachinidae	Exoristinae		Onychogonia	Onychogonia flaviceps		Jaakko L.O. Pohjoismaeki	jaakkop@uef.fi
JP00833	Arthropoda	Insecta	Diptera	Tachinidae	Tachininae		Actia	Actia infantula		Jaakko L.O. Pohjoismaeki	jaakkop@uef.fi
JP00834	Arthropoda	Insecta	Diptera	Tachinidae	Tachininae		Actia	Actia infantula		Jaakko L.O. Pohjoismaeki	jaakkop@uef.fi
JP00835	Arthropoda	Insecta	Diptera	Tachinidae	Tachininae		Actia	Actia infantula		Jaakko L.O. Pohjoismaeki	jaakkop@uef.fi
JP00837	Arthropoda	Insecta	Diptera	Tachinidae	Tachininae		Lypha	Lypha ruficauda		Jaakko L.O. Pohjoismaeki	jaakkop@uef.fi
JP00838	Arthropoda	Insecta	Diptera	Tachinidae	Exoristinae		Nilea	Nilea innoxia		Jaakko L.O. Pohjoismaeki	jaakkop@uef.fi
JP00839	Arthropoda	Insecta	Diptera	Tachinidae	Exoristinae		Carcelia	Carcelia bombylans		Jaakko L.O. Pohjoismaeki	jaakkop@uef.fi
JP00840	Arthropoda	Insecta	Diptera	Tachinidae	Exoristinae		Carcelia	Carcelia puberula		Jaakko L.O. Pohjoismaeki	jaakkop@uef.fi
JP00841	Arthropoda	Insecta	Diptera	Tachinidae	Exoristinae		Winthemia	Winthemia erythura		Jaakko L.O. Pohjoismaeki	jaakkop@uef.fi
JP00842	Arthropoda	Insecta	Diptera	Tachinidae	Tachininae		Panzeria	Panzeria rudis		Jaakko L.O. Pohjoismaeki	jaakkop@uef.fi
JP00843	Arthropoda	Insecta	Diptera	Tachinidae	Exoristinae		Paratryphera	Paratryphera bisetosa		Jaakko L.O. Pohjoismaeki	jaakkop@uef.fi
JP00844	Arthropoda	Insecta	Diptera	Tachinidae	Exoristinae		Erynnia	Erynnia ocypterata		Jaakko L.O. Pohjoismaeki	jaakkop@uef.fi
JP00845	Arthropoda	Insecta	Diptera	Tachinidae	Exoristinae		Medina	Medina luctuosa		Jaakko L.O. Pohjoismaeki	jaakkop@uef.fi
JP00846	Arthropoda	Insecta	Diptera	Tachinidae	Tachininae		Macquartia	Macquartia nudigena		Jaakko L.O. Pohjoismaeki	jaakkop@uef.fi
JP00847	Arthropoda	Insecta	Diptera	Tachinidae	Exoristinae		Paracraspedothrix	Paracraspedothrix montivaga		Jaakko L.O. Pohjoismaeki	jaakkop@uef.fi
JP00848	Arthropoda	Insecta	Diptera	Tachinidae	Exoristinae		Blondelia	Blondelia nigripes		Jaakko L.O. Pohjoismaeki	jaakkop@uef.fi
JP00849	Arthropoda	Insecta	Diptera	Tachinidae	Exoristinae		Exorista	Exorista fasciata		Jaakko L.O. Pohjoismaeki	jaakkop@uef.fi
JP00850	Arthropoda	Insecta	Diptera	Tachinidae	Exoristinae		Chetogena	Chetogena cf. tschorsnigi		Jaakko L.O. Pohjoismaeki	jaakkop@uef.fi
JP00851	Arthropoda	Insecta	Diptera	Tachinidae	Exoristinae		Chetogena	Chetogena acuminata		Jaakko L.O. Pohjoismaeki	jaakkop@uef.fi
JP00852	Arthropoda	Insecta	Diptera	Tachinidae	Exoristinae		Chetogena	Chetogena acuminata		Jaakko L.O. Pohjoismaeki	jaakkop@uef.fi
JP00853	Arthropoda	Insecta	Diptera	Tachinidae	Exoristinae		Vibrissina	Vibrissina turrita		Jaakko L.O. Pohjoismaeki	jaakkop@uef.fi
JP00854	Arthropoda	Insecta	Diptera	Tachinidae	Exoristinae		Carcelia	Carcelia tibialis		Jaakko L.O. Pohjoismaeki	jaakkop@uef.fi
JP00855	Arthropoda	Insecta	Diptera	Tachinidae	Exoristinae		Carcelia	Carcelia puberula		Jaakko L.O. Pohjoismaeki	jaakkop@uef.fi
JP00856	Arthropoda	Insecta	Diptera	Tachinidae	Exoristinae		Thecocarcelia	Thecocarcelia acutangulata		Jaakko L.O. Pohjoismaeki	jaakkop@uef.fi
JP00857	Arthropoda	Insecta	Diptera	Tachinidae	Exoristinae		Erycia			Jaakko L.O. Pohjoismaeki	jaakkop@uef.fi
JP00858	Arthropoda	Insecta	Diptera	Tachinidae	Tachininae		Panzeria	Panzeria laevigata		Jaakko L.O. Pohjoismaeki	jaakkop@uef.fi
JP00859	Arthropoda	Insecta	Diptera	Tachinidae	Tachininae		Linnaemya	Linnaemya haemorrhoidalis		Jaakko L.O. Pohjoismaeki	jaakkop@uef.fi
JP00860	Arthropoda	Insecta	Diptera	Tachinidae	Tachininae		Actia	Actia infantula		Jaakko L.O. Pohjoismaeki	jaakkop@uef.fi
JP00861	Arthropoda	Insecta	Diptera	Tachinidae	Tachininae		Peribaea	Peribaea setinervis		Jaakko L.O. Pohjoismaeki	jaakkop@uef.fi
JP00862	Arthropoda	Insecta	Diptera	Tachinidae	Dexiinae		Stomina	Stomina tachinoides		Jaakko L.O. Pohjoismaeki	jaakkop@uef.fi
JP00863	Arthropoda	Insecta	Diptera	Tachinidae	Exoristinae		Baumhaueria	Baumhaueria goniaeformis		Jaakko L.O. Pohjoismaeki	jaakkop@uef.fi
JP00864	Arthropoda	Insecta	Diptera	Tachinidae	Tachininae		Phytomyptera	Phytomyptera nigrina		Jaakko L.O. Pohjoismaeki	jaakkop@uef.fi
JP00865	Arthropoda	Insecta	Diptera	Tachinidae	Exoristinae		Cadurciella	Cadurciella tritaeniata		Jaakko L.O. Pohjoismaeki	jaakkop@uef.fi
JP00866	Arthropoda	Insecta	Diptera	Tachinidae	Exoristinae		Cadurciella	Cadurciella tritaeniata		Jaakko L.O. Pohjoismaeki	jaakkop@uef.fi
JP00867	Arthropoda	Insecta	Diptera	Tachinidae	Exoristinae		Erynnia	Erynnia ocypterata		Jaakko L.O. Pohjoismaeki	jaakkop@uef.fi
JP00868	Arthropoda	Insecta	Diptera	Tachinidae	Tachininae		Eurithia	Eurithia vivida		Jaakko L.O. Pohjoismaeki	jaakkop@uef.fi
JP00869	Arthropoda	Insecta	Diptera	Tachinidae	Exoristinae		Periarchiclops	Periarchiclops scutellaris		Jaakko L.O. Pohjoismaeki	jaakkop@uef.fi
JP00870	Arthropoda	Insecta	Diptera	Tachinidae	Exoristinae		Winthemia	Winthemia quadripustulata		Jaakko L.O. Pohjoismaeki	jaakkop@uef.fi
JP00871	Arthropoda	Insecta	Diptera	Tachinidae	Tachininae		Peribaea	Peribaea hertingi		Jaakko L.O. Pohjoismaeki	jaakkop@uef.fi
JP00872	Arthropoda	Insecta	Diptera	Tachinidae	Exoristinae		Istocheta	Istocheta longicornis		Jaakko L.O. Pohjoismaeki	jaakkop@uef.fi
JP00873	Arthropoda	Insecta	Diptera	Tachinidae	Dexiinae		Blepharomyia	Blepharomyia piliceps		Jaakko L.O. Pohjoismaeki	jaakkop@uef.fi
JP00874	Arthropoda	Insecta	Diptera	Tachinidae	Exoristinae		Medina	Medina luctuosa		Jaakko L.O. Pohjoismaeki	jaakkop@uef.fi
JP00875	Arthropoda	Insecta	Diptera	Tachinidae	Exoristinae		Staurochaeta	Staurochaeta albocingulata		Jaakko L.O. Pohjoismaeki	jaakkop@uef.fi
JP00876	Arthropoda	Insecta	Diptera	Tachinidae	Exoristinae		Smidtia	Smidtia amoena		Jaakko L.O. Pohjoismaeki	jaakkop@uef.fi
JP00877	Arthropoda	Insecta	Diptera	Tachinidae	Exoristinae		Nemorilla	Nemorilla maculosa		Jaakko L.O. Pohjoismaeki	jaakkop@uef.fi
JP00878	Arthropoda	Insecta	Diptera	Tachinidae	Exoristinae		Phryxe	Phryxe heraclei		Jaakko L.O. Pohjoismaeki	jaakkop@uef.fi
JP00879	Arthropoda	Insecta	Diptera	Tachinidae	Exoristinae		Phryxe	Phryxe heraclei		Jaakko L.O. Pohjoismaeki	jaakkop@uef.fi
JP00880	Arthropoda	Insecta	Diptera	Tachinidae	Exoristinae		Phryxe	Phryxe erythrostoma		Jaakko L.O. Pohjoismaeki	jaakkop@uef.fi
JP00881	Arthropoda	Insecta	Diptera	Tachinidae	Exoristinae		Phryxe	Phryxe vulgaris		Jaakko L.O. Pohjoismaeki	jaakkop@uef.fi
JP00882	Arthropoda	Insecta	Diptera	Tachinidae	Exoristinae		Lydella	Lydella ripae		Jaakko L.O. Pohjoismaeki	jaakkop@uef.fi
JP00883	Arthropoda	Insecta	Diptera	Tachinidae	Exoristinae		Medina	Medina luctuosa		Jaakko L.O. Pohjoismaeki	jaakkop@uef.fi
JP00884	Arthropoda	Insecta	Diptera	Tachinidae	Exoristinae		Medina	Medina luctuosa		Jaakko L.O. Pohjoismaeki	jaakkop@uef.fi
JP00885	Arthropoda	Insecta	Diptera	Tachinidae	Exoristinae		Gonia	Gonia divisa		Jaakko L.O. Pohjoismaeki	jaakkop@uef.fi
JP00886	Arthropoda	Insecta	Diptera	Tachinidae	Exoristinae		Cyzenis	Cyzenis jucunda		Jaakko L.O. Pohjoismaeki	jaakkop@uef.fi
JP00887	Arthropoda	Insecta	Diptera	Tachinidae	Exoristinae		Cyzenis	Cyzenis albicans		Jaakko L.O. Pohjoismaeki	jaakkop@uef.fi
JP00888	Arthropoda	Insecta	Diptera	Tachinidae	Tachininae		Ceromya	Ceromya bicolor		Jaakko L.O. Pohjoismaeki	jaakkop@uef.fi
JP00889	Arthropoda	Insecta	Diptera	Tachinidae	Exoristinae		Phryno	Phryno vetula		Jaakko L.O. Pohjoismaeki	jaakkop@uef.fi
JP00890	Arthropoda	Insecta	Diptera	Tachinidae	Tachininae		Linnaemya	Linnaemya picta		Jaakko L.O. Pohjoismaeki	jaakkop@uef.fi
JP00891	Arthropoda	Insecta	Diptera	Tachinidae	Tachininae		Linnaemya	Linnaemya tessellans		Jaakko L.O. Pohjoismaeki	jaakkop@uef.fi
JP00892	Arthropoda	Insecta	Diptera	Tachinidae	Tachininae		Tachina	Tachina nupta		Jaakko L.O. Pohjoismaeki	jaakkop@uef.fi
JP00893	Arthropoda	Insecta	Diptera	Tachinidae	Exoristinae		Epicampocera	Epicampocera succincta		Jaakko L.O. Pohjoismaeki	jaakkop@uef.fi
JP00894	Arthropoda	Insecta	Diptera	Tachinidae	Dexiinae		Blepharomyia	Blepharomyia piliceps		Jaakko L.O. Pohjoismaeki	jaakkop@uef.fi
JP00895	Arthropoda	Insecta	Diptera	Tachinidae	Phasiinae		Cistogaster	Cistogaster globosa		Jaakko L.O. Pohjoismaeki	jaakkop@uef.fi
MZH_HP.684	Arthropoda	Insecta	Diptera	Tachinidae	Tachininae		Pseudopachystylum	Pseudopachystylum gonioides		Jere Kahanpaa	jere.kahanpaa@helsinki.fi
JP00096	Arthropoda	Insecta	Diptera	Tachinidae	Tachininae		Linnaemya	Linnaemya bergstroemi		Jaakko L.O. Pohjoismaeki	jaakkop@uef.fi
JP00097	Arthropoda	Insecta	Diptera	Tachinidae	Tachininae		Phytomyptera	Phytomyptera nigroaenea		Jaakko L.O. Pohjoismaeki	jaakkop@uef.fi
JP00098	Arthropoda	Insecta	Diptera	Tachinidae	Exoristinae		Carcelia	Carcelia gnava		Jaakko L.O. Pohjoismaeki	jaakkop@uef.fi		Carcelia gnava
JP00099	Arthropoda	Insecta	Diptera	Tachinidae	Exoristinae		Carcelia	Carcelia lucorum		Jaakko L.O. Pohjoismaeki	jaakkop@uef.fi
MZH_HP.2151	Arthropoda	Insecta	Diptera	Tachinidae	Exoristinae		Medina	Medina luctuosa		J. Flinck	dipterabarcodes@luomus.fi
MZH_HP.2152	Arthropoda	Insecta	Diptera	Tachinidae	Exoristinae		Myxexoristops	Myxexoristops bonsdorffi		J. Flinck	dipterabarcodes@luomus.fi
MZH_HP.2153	Arthropoda	Insecta	Diptera	Tachinidae	Exoristinae		Oswaldia	Oswaldia reducta		J. Flinck	dipterabarcodes@luomus.fi
MZH_HP.2216	Arthropoda	Insecta	Diptera	Tachinidae	Exoristinae		Cyzenis	Cyzenis jucunda		J. Flinck	dipterabarcodes@luomus.fi
MZH_HP.2261	Arthropoda	Insecta	Diptera	Tachinidae	Dexiinae		Periscepsia	Periscepsia ringdahli		J. Flinck	dipterabarcodes@luomus.fi
MZH_HP.2279	Arthropoda	Insecta	Diptera	Tachinidae	Dexiinae		Estheria	Estheria petiolata		J. Flinck	dipterabarcodes@luomus.fi
MZH_HP.2280	Arthropoda	Insecta	Diptera	Tachinidae	Exoristinae		Oswaldia	Oswaldia eggeri		J. Flinck	dipterabarcodes@luomus.fi
MZH_HP.2281	Arthropoda	Insecta	Diptera	Tachinidae	Dexiinae		Klugia	Klugia marginata		J. Flinck	dipterabarcodes@luomus.fi
MZH_HP.2282	Arthropoda	Insecta	Diptera	Tachinidae	Tachininae		Panzeria	Panzeria vagans		J. Flinck	dipterabarcodes@luomus.fi
MZH_HP.2283	Arthropoda	Insecta	Diptera	Tachinidae	Tachininae		Eurithia	Eurithia vivida		J. Flinck	dipterabarcodes@luomus.fi
MZH_HP.2284	Arthropoda	Insecta	Diptera	Tachinidae	Exoristinae		Winthemia	Winthemia cruentata		J. Flinck	dipterabarcodes@luomus.fi
MZH_HP.2285	Arthropoda	Insecta	Diptera	Tachinidae	Exoristinae		Winthemia	Winthemia cruentata		J. Flinck	dipterabarcodes@luomus.fi
JP00196	Arthropoda	Insecta	Diptera	Tachinidae	Tachininae		Siphona	Siphona cristata		Jaakko L.O. Pohjoismaeki	jaakkop@uef.fi
JP00197	Arthropoda	Insecta	Diptera	Tachinidae	Exoristinae		Carcelia	Carcelia puberula		Jaakko L.O. Pohjoismaeki	jaakkop@uef.fi
JP00198	Arthropoda	Insecta	Diptera	Tachinidae	Dexiinae		Klugia	Klugia marginata		Jaakko L.O. Pohjoismaeki	jaakkop@uef.fi
JP00927	Arthropoda	Insecta	Diptera	Tachinidae	Exoristinae		Ceromasia	Ceromasia rubrifrons		T. Zeegers
JP00901	Arthropoda	Insecta	Diptera	Tachinidae	Dexiinae		Estheria	Estheria petiolata		Jaakko L.O. Pohjoismaeki	jaakkop@uef.fi
JP00902	Arthropoda	Insecta	Diptera	Tachinidae	Dexiinae		Estheria	Estheria petiolata		Jaakko L.O. Pohjoismaeki	jaakkop@uef.fi
JP00903	Arthropoda	Insecta	Diptera	Tachinidae	Exoristinae		Exorista			Jaakko L.O. Pohjoismaeki	jaakkop@uef.fi
JP00904	Arthropoda	Insecta	Diptera	Tachinidae	Exoristinae		Erynnia	Erynnia ocypterata		Jaakko L.O. Pohjoismaeki	jaakkop@uef.fi
JP00905	Arthropoda	Insecta	Diptera	Tachinidae	Exoristinae		Erynnia	Erynnia ocypterata		Jaakko L.O. Pohjoismaeki	jaakkop@uef.fi
JP00906	Arthropoda	Insecta	Diptera	Tachinidae	Exoristinae		Erynnia	Erynnia ocypterata		Jaakko L.O. Pohjoismaeki	jaakkop@uef.fi
JP00907	Arthropoda	Insecta	Diptera	Tachinidae	Exoristinae		Carcelia	Carcelia bombylans		Jaakko L.O. Pohjoismaeki	jaakkop@uef.fi
JP00908	Arthropoda	Insecta	Diptera	Tachinidae	Exoristinae		Oswaldia	Oswaldia eggeri		Jaakko L.O. Pohjoismaeki	jaakkop@uef.fi
JP00909	Arthropoda	Insecta	Diptera	Tachinidae	Exoristinae		Erycia	Erycia furibunda		Jaakko L.O. Pohjoismaeki	jaakkop@uef.fi
JP00910	Arthropoda	Insecta	Diptera	Tachinidae	Tachininae		Linnaemya	Linnaemya rossica		Jaakko L.O. Pohjoismaeki	jaakkop@uef.fi
JP00911	Arthropoda	Insecta	Diptera	Tachinidae	Tachininae		Linnaemya	Linnaemya rossica		Jaakko L.O. Pohjoismaeki	jaakkop@uef.fi
JP00912	Arthropoda	Insecta	Diptera	Tachinidae	Exoristinae		Gonia	Gonia picea		Jaakko L.O. Pohjoismaeki	jaakkop@uef.fi
JP00913	Arthropoda	Insecta	Diptera	Tachinidae	Exoristinae		Gonia	Gonia picea		Jaakko L.O. Pohjoismaeki	jaakkop@uef.fi
JP00914	Arthropoda	Insecta	Diptera	Tachinidae	Exoristinae		Gonia	Gonia picea		Jaakko L.O. Pohjoismaeki	jaakkop@uef.fi
JP00915	Arthropoda	Insecta	Diptera	Tachinidae	Tachininae		Eurithia	Eurithia vivida		Jaakko L.O. Pohjoismaeki	jaakkop@uef.fi
JP00916	Arthropoda	Insecta	Diptera	Tachinidae	Dexiinae		Thelaira	Thelaira nigrina		Jaakko L.O. Pohjoismaeki	jaakkop@uef.fi
JP00917	Arthropoda	Insecta	Diptera	Tachinidae	Tachininae		Nowickia	Nowickia marklini		Jaakko L.O. Pohjoismaeki	jaakkop@uef.fi		Previous ID: Nowickia marklini
JP00918	Arthropoda	Insecta	Diptera	Tachinidae	Exoristinae		Exorista	Exorista larvarum		Jaakko L.O. Pohjoismaeki	jaakkop@uef.fi
JP00921	Arthropoda	Insecta	Diptera	Tachinidae	Exoristinae		Erycia	Erycia furibunda		Jaakko L.O. Pohjoismaeki	jaakkop@uef.fi
JP00922	Arthropoda	Insecta	Diptera	Tachinidae	Exoristinae		Phebellia	Phebellia villica		Jaakko L.O. Pohjoismaeki	jaakkop@uef.fi
JP00923	Arthropoda	Insecta	Diptera	Tachinidae	Exoristinae		Carcelia	Carcelia tibialis		Jaakko L.O. Pohjoismaeki	jaakkop@uef.fi
JP00924	Arthropoda	Insecta	Diptera	Tachinidae	Exoristinae		Platymya	Platymya fimbriata		Jaakko L.O. Pohjoismaeki	jaakkop@uef.fi
JP00925	Arthropoda	Insecta	Diptera	Tachinidae	Exoristinae		Phryxe	Phryxe vulgaris		Jaakko L.O. Pohjoismaeki	jaakkop@uef.fi
JP00926	Arthropoda	Insecta	Diptera	Tachinidae	Exoristinae		Staurochaeta	Staurochaeta albocingulata		Jaakko L.O. Pohjoismaeki	jaakkop@uef.fi
ThZ00001	Arthropoda	Insecta	Diptera	Tachinidae	Phasiinae		Germariochaeta	Germariochaeta clavata		T. Zeegers			Germariochaeta clavata
ZMUO.012846	Arthropoda	Insecta	Diptera	Tachinidae	Tachininae		Lypha	Lypha ruficauda		Jaakko Pohjoismaki	jaakko.pohjoismaki@uef.fi
JP00100	Arthropoda	Insecta	Diptera	Tachinidae	Tachininae		Graphogaster	Graphogaster dispar		Jaakko L.O. Pohjoismaeki	jaakkop@uef.fi		Graphogaster dispar
JP00199	Arthropoda	Insecta	Diptera	Tachinidae	Dexiinae		Periscepsia	Periscepsia prunaria		Jaakko L.O. Pohjoismaeki	jaakkop@uef.fi
JP00200	Arthropoda	Insecta	Diptera	Tachinidae	Dexiinae		Rondania	Rondania fasciata		Jaakko L.O. Pohjoismaeki	jaakkop@uef.fi
AHa14-003401	Arthropoda	Insecta	Diptera	Tachinidae	Exoristinae		Lecanipa	Lecanipa bicincta		Antti Haarto	ahaarto@gmail.com		Lecanipa bicincta
JP00296	Arthropoda	Insecta	Diptera	Tachinidae	Exoristinae		Exorista	Exorista mimula		Jaakko L.O. Pohjoismaeki	jaakkop@uef.fi
JP00928	Arthropoda	Insecta	Diptera	Tachinidae	Dexiinae		Chaetovoria	Chaetovoria antennata		Jaakko L.O. Pohjoismaeki	jaakkop@uef.fi
JP00929	Arthropoda	Insecta	Diptera	Tachinidae	Tachininae		Solieria	Solieria inanis		Jaakko Pohjoismaki	jaakko.pohjoismaki@uef.fi
JP00930	Arthropoda	Insecta	Diptera	Tachinidae	Tachininae		Solieria	Solieria inanis		Jaakko Pohjoismaki	jaakko.pohjoismaki@uef.fi
JP00931	Arthropoda	Insecta	Diptera	Tachinidae	Exoristinae		Phryxe	Phryxe vulgaris		Jaakko Pohjoismaki	jaakko.pohjoismaki@uef.fi
JP00932	Arthropoda	Insecta	Diptera	Tachinidae	Exoristinae		Phryxe	Phryxe heraclei		Jaakko Pohjoismaki	jaakko.pohjoismaki@uef.fi
JP00933	Arthropoda	Insecta	Diptera	Tachinidae	Exoristinae		Admontia	Admontia maculisquama		Jaakko Pohjoismaki	jaakko.pohjoismaki@uef.fi
JP00934	Arthropoda	Insecta	Diptera	Tachinidae	Exoristinae		Phorinia	Phorinia aurifrons		Jaakko Pohjoismaki	jaakko.pohjoismaki@uef.fi
JP00935	Arthropoda	Insecta	Diptera	Tachinidae	Tachininae		Loewia	Loewia erecta		Jaakko Pohjoismaki	jaakko.pohjoismaki@uef.fi
JP00936	Arthropoda	Insecta	Diptera	Tachinidae	Dexiinae		Billaea	Billaea fortis		Jaakko Pohjoismaki	jaakko.pohjoismaki@uef.fi
JP00937	Arthropoda	Insecta	Diptera	Tachinidae	Exoristinae		Phebellia	Phebellia strigifrons		Jaakko Pohjoismaki	jaakko.pohjoismaki@uef.fi
JP00938	Arthropoda	Insecta	Diptera	Tachinidae	Exoristinae		Myxexoristops	Myxexoristops arctica		Jaakko Pohjoismaki	jaakko.pohjoismaki@uef.fi
JP00939	Arthropoda	Insecta	Diptera	Tachinidae	Tachininae		Entomophaga	Entomophaga nigrohalterata		Jaakko Pohjoismaki	jaakko.pohjoismaki@uef.fi
JP00940	Arthropoda	Insecta	Diptera	Tachinidae	Tachininae		Synactia	Synactia parvula		Jaakko Pohjoismaki	jaakko.pohjoismaki@uef.fi
JP00941	Arthropoda	Insecta	Diptera	Tachinidae	Exoristinae		Phebellia	Phebellia glauca		Jaakko Pohjoismaki	jaakko.pohjoismaki@uef.fi
JP00942	Arthropoda	Insecta	Diptera	Tachinidae	Phasiinae		Cylindromyia	Cylindromyia rufipes		Jaakko Pohjoismaki	jaakko.pohjoismaki@uef.fi
JP00943	Arthropoda	Insecta	Diptera	Tachinidae	Exoristinae		Lydella	Lydella thompsoni		Jaakko Pohjoismaki	jaakko.pohjoismaki@uef.fi
JP00944	Arthropoda	Insecta	Diptera	Tachinidae	Dexiinae		Periscepsia			Jaakko Pohjoismaki	jaakko.pohjoismaki@uef.fi		sp. nr. prunaria
JP00945	Arthropoda	Insecta	Diptera	Tachinidae	Dexiinae		Periscepsia			Jaakko Pohjoismaki	jaakko.pohjoismaki@uef.fi		sp. nr. prunaria
JP00946	Arthropoda	Insecta	Diptera	Tachinidae	Exoristinae		Trigonospila	Trigonospila ludio		Jaakko Pohjoismaki	jaakko.pohjoismaki@uef.fi

## Sheet: Specimen Details
Sample ID	Sex	Reproduction	Life Stage	Extra Info	Notes	Voucher Status	Tissue Descriptor	External URLs	Associated Taxa	Associated Specimens
lampe00002		S	A
lampe00003		S	A
lampe00004		S	A
lampe00005		S	A
lampe00006		S	A
lampe00007		S	A
lampe00008		S	A
lampe00009		S	A
lampe00010		S	A
lampe00092		S	A
lampe00093		S	A
lampe00094		S	A
lampe00095		S	A
JP00001		S	A		11.-23.6.2006
JP00002		S	A
JP00003		S	A		Ch. Bergstroem det. no 970
JP00004		S	A
JP00005		S	A
JP00006		S	A
JP00007		S	A		17.5.-19.6.2008
JP00008		S	A
JP00009		S	A
JP00010		S	A
JP00011		S	A
JP00012		S	A		July 2008
JP00013		S	A		8.-31.5.2006
JP00014		S	A
JP00015		S	A		xx-9.9.2007
JP00016		S	A
JP00017		S	A
JP00018		S	A		11.-23.6.2006
JP00019		S	A
JP00020		S	A
JP00021		S	A
JP00022		S	A
JP00023		S	A		11.-23.6.2006
JP00024		S	A
JP00025		S	A
JP00026		S	A
JP00027		S	A
JP00028		S	A		e.l. `D.selenitic.`, 1978
JP00029		S	A		e.l. 1997
JP00030		S	A		e.l. `S. pavonia`, 1944
JP00031		S	A		e.l. `Hyles euphorbiae`
JP00032		S	A		26.5.-17.6.2007
JP00033		S	A
JP00034		S	A		e.l. `Diprion pini`,
JP00035		S	A
JP00036		S	A
JP00037		S	A		12.7.-7.8.2000
JP00038		S	A
JP00039		S	A
JP00040		S	A
JP00041		S	A
JP00042		S	A
JP00043		S	A
JP00044		S	A
JP00045		S	A		window trap 2005
JP00046		S	A		12.7.-2.8.2005
JP00047		S	A		19.6.-12.7.2005 det. C. Bergstroem
JP00048		S	A
JP00050		S	A
JP00051		S	A
JP00052		S	A
JP00053		S	A
JP00054		S	A
JP00055		S	A
JP00056		S	A		24.7.-3.9.2007
JP00057		S	A
JP00058		S	A		::taxonomy:Dark form::endTaxonomy:28.7.-13.8.2005
JP00059		S	A		::taxonomy:Dark form::endTaxonomy:
JP00060		S	A		::taxonomy:dark form::endTaxonomy:
JP00061		S	A
JP00062		S	A
JP00063		S	A		16.6.-12.7.2005
JP00064		S	A
JP00065		S	A
JP00066		S	A
JP00067		S	A		e.l. `Saperda populnea`, 2004
JP00068		S	A		JF10-5248
JP00069		S	A		window trap 2005
JP00070		S	A		July 2008
JP00071		S	A
JP00072		S	A
JP00073		S	A
JP00074		S	A
JP00075		S	A
JP00076		S	A
JP00077		S	A		25.5.-30.6.2008
JP00078		S	A
JP00079		S	A		17.5.-16.6.2008
JP00080		S	A
JP00081		S	A		e.p. `Noctuidae`, 9.-12.5.2007
JP00082		S	A		det. C. Bergstroem, 1119
JP00083		S	A
JP00084		S	A
JP00085		S	A
JP00086		S	A
JP00087		S	A
JP00088		S	A
JP00089		S	A
JP00090		S	A
JP00091		S	A
JP00092		S	A		12.7.-7.8.2000
JP00093		S	A		e.l. 2010
JP00094		S	A		xx-9.9.2007
JP00095		S	A
MZH_HP.184	F	S	A	aHa11-002952	http://id.luomus.fi/HP.184
MZH_HP.196	M	S	A	aHa11-002949	http://id.luomus.fi/HP.196
MZH_HP.197	M	S	A	aHa11-002951	http://id.luomus.fi/HP.197
MZH_HP.198	M	S	A	aHa11-002742	http://id.luomus.fi/HP.198
MZH_HP.199	M	S	A	aHa11-002743	http://id.luomus.fi/HP.199
MZH_HP.200	F	S	A	aHa11-002753	http://id.luomus.fi/HP.200
MZH_HP.244	M	S	A	aHa11-002711	http://id.luomus.fi/HP.244
MZH_HP.245	M	S	A	aHa11-002712	http://id.luomus.fi/HP.245
MZH_HP.246	F	S	A	aHa11-002713	http://id.luomus.fi/HP.246
MZH_HP.257	M	S	A	aHa11-002585	http://id.luomus.fi/HP.257
MZH_HP.259	F	S	A	aHa11-002709	http://id.luomus.fi/HP.259
MZH_HP.282	F	S	A	aHa11-003031	http://id.luomus.fi/HP.282
MZH_HP.324	M	S	A	aHa11-003090	http://id.luomus.fi/HP.324
MZH_HP.338	M	S	A	aHa11-003098	http://id.luomus.fi/HP.338
MZH_HP.339	F	S	A	aHa11-003102	http://id.luomus.fi/HP.339
MZH_HP.347	M	S	A	aHa11-003127	http://id.luomus.fi/HP.347
MZH_HP.358	M	S	A	aHa11-003177	http://id.luomus.fi/HP.358
MZH_HP.359	F	S	A	aHa11-003176	http://id.luomus.fi/HP.359
MZH_HP.360	M	S	A	aHa11-003175	http://id.luomus.fi/HP.360
MZH_HP.362	M	S	A	aHa11-003185	http://id.luomus.fi/HP.362
MZH_HP.363	F	S	A	aHa11-003186	http://id.luomus.fi/HP.363
MZH_HP.374	F	S	A	aHa11-003178	http://id.luomus.fi/HP.374
MZH_HP.375	F	S	A	aHa11-003180	http://id.luomus.fi/HP.375
MZH_HP.376	F	S	A	aHa11-003181	http://id.luomus.fi/HP.376
MZH_HP.378	F	S	A	aHa11-003197	http://id.luomus.fi/HP.378
MZH_HP.379	F	S	A	aHa11-003198	http://id.luomus.fi/HP.379
MZH_HP.380	F	S	A	aHa11-003187	http://id.luomus.fi/HP.380
MZH_HP.381	M	S	A	aHa11-003183	http://id.luomus.fi/HP.381
MZH_HP.382	M	S	A	aHa11-003184	http://id.luomus.fi/HP.382
MZH_HP.383	M	S	A	aHa11-003189	http://id.luomus.fi/HP.383
MZH_HP.384	M	S	A	aHa11-003190	http://id.luomus.fi/HP.384
MZH_HP.385	F	S	A	aHa11-003199	http://id.luomus.fi/HP.385
MZH_HP.386	M	S	A	aHa11-003188	http://id.luomus.fi/HP.386
MZH_HP.407	M	S	A	aHa11-003228	http://id.luomus.fi/HP.407
MZH_HP.445	M	S	A	aHa11-003305	http://id.luomus.fi/HP.445
MHZ_HP.492	F	S	A	aHa11-003454	http://id.luomus.fi/HP.492
MHZ_HP.493	M	S	A	aHa11-003453	http://id.luomus.fi/HP.493
MHZ_HP.536	M	S	A	aHa11-003533	http://id.luomus.fi/HP.536
MZH_GV.3474	M	S	A	MZH_GV.3474
MZH_GV.3512	F	S	A	MZH_GV.3512
MZH_GV.3205	M	S	A	http://id.luomus.fi/GV.3205	A3(I)A4: On Sorbus sorbifolia
MZH_GV.3217	M	S	A	http://id.luomus.fi/GV.3217	Vr3A3: On Sorbus sorbifolia: Period: Aug-03-2010 - Aug-05-2010
MZH_GV.3233	F	S	A	http://id.luomus.fi/GV.3233	`Frerea gagatea` on label: Sor7B: On Sorbaria: Period: Aug-08-2011 - Aug-15-2011
MZH_GV.3277	F	S	A	http://id.luomus.fi/GV.3277
MZH_GV.3278	F	S	A	http://id.luomus.fi/GV.3278	`Wintemia quadripustulata` on label
MZH_GV.3279	F	S	A	http://id.luomus.fi/GV.3279
MZH_GV.3280	M	S	A	http://id.luomus.fi/GV.3280
MZH_GV.3281	F	S	A	http://id.luomus.fi/GV.3281
jka11-02259	F	S	A	jka11-02259
MZH_HP.588	F	S	A	aHa11-003714	http://id.luomus.fi/HP.588
MZH_HP.589	M	S	A	aHa11-003706	http://id.luomus.fi/HP.589
MZH_HP.590	M	S	A	aHa11-003708	http://id.luomus.fi/HP.590
MZH_HP.591	F	S	A	aHa11-003710	http://id.luomus.fi/HP.591
MZH_HP.592	F	S	A	aHa11-003711	http://id.luomus.fi/HP.592
MZH_HP.593	F	S	A	aHa11-003712	http://id.luomus.fi/HP.593
MZH_HP.751	F	S	A	jka11-00075	http://id.luomus.fi/HP.751
MZH_HP.818	M	S	A	jka11-00327	http://id.luomus.fi/HP.818
MZH_HP.925	F	S	A	jka11-00528	http://id.luomus.fi/HP.925
JP00201		S	A		Period: Jun-29-2007 - Jul-12-2007
JP00202		S	A
JP00203	M	S	A
JP00204		S	A		ex larva
JP00205		S	A
JP00206	M	S	A		1000 m.
JP00207		S	A
JP00208		S	A		Period: Jul-08-2004 - Jul-09-2004
JP00209		S	A
JP00210		S	A
JP00211		S	A
JP00212		S	A
JP00213		S	A
JP00214		S	A		`Linneamya tesselans` on label
JP00215		S	A		Period: Jul-12-2007 - Jul-29-2007
JP00216	M	S	A		`*685` on separate small yellow label
JP00217		S	A		window trap
JP00218		S	A
JP00219		S	A
JP00220		S	A
JP00221		S	A
JP00222		S	A
JP00223		S	A		Period: May-07-2008 - Jun-06-2008
JP00224		S	A
JP00225		S	A
JP00226		S	A
JP00227		S	A		Period: Jul-08-2005 - Jul-14-2005
JP00228		S	A
JP00229		S	A
JP00230		S	A		Period: Jun-19-2008 - Aug-02-2008
JP00231		S	A
JP00232		S	A
JP00233		S	A		Period: Jul-28-2005 - Aug-13-2005
JP00234		S	A
JP00235		S	A
JP00236		S	A
JP00237		S	A
JP00238		S	A
JP00239		S	A
JP00240		S	A
JP00241		S	A
JP00242		S	A		Period: May-17-2008 - Jun-19-2008
JP00243		S	A
JP00244		S	A
JP00245		S	A
JP00246		S	A
JP00247		S	A		Period: Jul-14-2005 - Jul-27-2005
JP00248		S	A
JP00249		S	A
JP00250		S	A		Period: Aug-02-2008 - Sep-21-2008
JP00251		S	A
JP00252		S	A
JP00253		S	A		Period: Jun-06-2008 - Jul-24-2008
JP00254		S	A		Period: Jun-30-2008 - Jul-27-2008
JP00255		S	A
JP00256		S	A		Period: May-25-2008 - Jun-30-2008
JP00257		S	A
JP00258		S	A
JP00259		S	A		Period: Jul-22-2003 - Aug-21-2003
JP00260		S	A		Period: Jul-27-2005 - Aug-12-2005
JP00261		S	A		Period: May-26-2007 - Jun-17-2007
JP00262		S	A
JP00263		S	A		Period: Aug-02-2007 - Sep-01-2007
JP00264		S	A
JP00265		S	A		Period: May-30-2008 - Jun-19-2008
JP00266		S	A		Period: Jul-22-2003 - Aug-21-2003
JP00267		S	A		Period, start day unknown (marked on label as `xx-9.9.2007`)
JP00268		S	A		Period: Jul-22-2003 - Aug-21-2003
JP00269		S	A		Period: Jul-12-2000 - Aug-07-2000
JP00270		S	A
JP00271		S	A		Period: May-30-2008 - Jun-19-2008
JP00272	F	S	A		Period: Jul-15-2005 - Jul-28-2005
JP00273		S	A		Period: May-25-2008 - Jun-30-2008
JP00274		S	A
JP00275		S	A
JP00276		S	A
JP00277		S	A		Period: Jul-08-2005 - Jul-14-2005
JP00278		S	A
JP00279		S	A
JP00280		S	A
JP00281		S	A		Period: Jul-09-2006 - Aug-12-2006
JP00282		S	A		Period: Jul-12-2000 - Aug-07-2000
JP00283		S	A		Period: Jun-11-2006 - Jun-23-2006
JP00284		S	A
JP00285		S	A
JP00286		S	A
JP00287		S	A		::taxonomy:Estheria sp.::endTaxonomy:
JP00288		S	A
JP00289		S	A		Period: Jun-11-2006 - Jun-23-2006
JP00290		S	A
JP00291		S	A
JP00292		S	A
JP00293		S	A
JP00294		S	A		Period: Jun-22-2007 - Jun-24-2007
JP00295		S	A
MZH_GV.3522	M	S	A	jka11-02598	http://id.luomus.fi/MZH_GV.3522
MZH_GV.3524	F	S	A	jka11-02614	http://id.luomus.fi/MZH_GV.3524
MZH_GV.3529	F	S	A	jka11-02586	http://id.luomus.fi/MZH_GV.3529
JP00101		S	A		Period: Jun-11-2006 - Jun-23-2006
JP00102		S	A
JP00103	M	S	A		Period: Jun-11-2006 - Jun-23-2006
JP00104		S	A
JP00105		S	A
JP00106		S	A
JP00107		S	A
JP00108		S	A
JP00109		S	A
JP00110		S	A
JP00111		S	A
JP00112		S	A
JP00113		S	A		Period: Jun-11-2006 - Jun-23-2006
JP00114	M	S	A
JP00115		S	A
JP00116		S	A
JP00117		S	A
JP00118		S	A
JP00119		S	A
JP00120		S	A
JP00121		S	A		Date on label: `e .1 1985`
JP00122		S	A
JP00123		S	A		Period: May-26-2007 - Jun-17-2007
JP00124		S	A
JP00125		S	A
JP00126		S	A
JP00127		S	A
JP00128	M	S	A		Farbschale gelb K100
JP00129		S	A
JP00130		S	A
JP00131		S	A
JP00132		S	A		Period: Jul-14-2005 - Jul-27-2005
JP00133		S	A
JP00134	M	S	A		`*363` printed on separate, small yellow label
JP00135		S	A
JP00136		S	A
JP00137		S	A		Period: Jul-25-2007 - Aug-31-2007
JP00138		S	A
JP00139		S	A
JP00140	F	S	A
JP00141		S	A		Period: Jun-29-2007 - Jul-12-2007
JP00142		S	A
JP00143		S	A
JP00144		S	A
JP00145		S	A
JP00146		S	A		JF06-0640: malaise trap
JP00147		S	A		JF06-1911: malaise trap
JP00148	M	S	A		Period: Jun-11-2006 - Jun-23-2006
JP00149		S	A
JP00150		S	A
JP00151		S	A
JP00152		S	A
JP00153		S	A		Period: Jun-22-2007 - Jun-24-2007
JP00154	F	S	A		`e.1. 2005 ?Dipnon pini?`
JP00155		S	A		JF06-1828: malaise trap
JP00156		S	A		::taxonomy:Drino vicina::endTaxonomy:
JP00157		S	A
JP00158		S	A		Period: Jul-22-2003 - Aug-21-2003
JP00159		S	A		`ex Thaumet. processionea`: Period: Apr-20-1994 - Apr-21-1994
JP00160		S	A		Period: May-26-2007 - Jun-17-2007
JP00161		S	A
JP00162		S	A		ex larva
JP00163		S	A
JP00164		S	A
JP00165		S	A		`Senemetopia separata` on label
JP00166		S	A		ex larva: Period: May-12-2001 - May-25-2001
JP00167		S	A		Period: Apr-22-1994 - Apr-25-1994
JP00168		S	A		ex larva
JP00169		S	A
JP00170		S	A
JP00171		S	A
JP00172		S	A		Period: May-26-2007 - Jun-17-2007
JP00173		S	A
JP00174		S	A
JP00175		S	A
JP00176		S	A		ex larva
JP00177		S	A		Period: Jul-12-2007 - Jul-29-2007
JP00178		S	A		Period: Jun-11-2006 - Jun-23-2006
JP00179		S	A
JP00180		S	A		Period: May-22-2005 - Jun-19-2005
JP00181		S	A
JP00182	F	S	A
JP00183		S	A
JP00184		S	A
JP00185		S	A
JP00186		S	A		`Plephariba pratensis` on label
JP00187		S	A
JP00188		S	A		malaise trap
JP00189		S	A		Period: Jun-30-2008 - Jul-27-2008
JP00190		S	A
JP00191	M	S	A
JP00192		S	A
JP00193	F	S	A
JP00194		S	A
JP00195		S	A
jka11-01724	F	S	A		Museum voucher id: http://id.luomus.fi/HP.1350
jka11-00489	F	S	A		Museum voucher id: http://id.luomus.fi/HP.1363
jka11-01645	M	S	A		Museum voucher id: http://id.luomus.fi/HP.1401
jka11-00705	M	S	A		Museum voucher id: http://id.luomus.fi/HP.994
jka11-00770	F	S	A		Museum voucher id: http://id.luomus.fi/HP.1010
jka11-00839	F	S	A		Museum voucher id: http://id.luomus.fi/HP.1028
jka11-00898	M	S	A		Museum voucher id: http://id.luomus.fi/HP.1034
jka11-00903	M	S	A		Museum voucher id: http://id.luomus.fi/HP.1035
jka11-00899	M	S	A		Museum voucher id: http://id.luomus.fi/HP.1040
jka11-00965	M	S	A		Museum voucher id: http://id.luomus.fi/HP.1044
jka11-01060	F	S	A		Museum voucher id: http://id.luomus.fi/HP.1053
jka11-01055	M	S	A		Museum voucher id: http://id.luomus.fi/HP.1056
JP00301		S	A		Identifiers:Jaakko L.O. Pohjoismaeki
JP00302	M	S	A		21.825
JP00303	M	S	A		Paratypus
JP00304	M	S	A		24.296
JP00305	M	S	A
JP00306	M	S	A
JP00307	M	S	A
JP00308	M	S	A		24.949
JP00309	M	S	A		19.953
JP00310	M	S	A		22.703
JP00311	M	S	A		19.842
JP00312	F	S	A		33.129
JP00313	F	S	A		33.558
JP00314	F	S	A		14.654
JP00315	M	S	A		14.681
JP00316	M	S	A		27.413
JP00317	M	S	A
JP00318	F	S	A		33.061
JP00319	M	S	A		20.991
JP00320	M	S	A
JP00321	M	S	A		24.873
JP00322	F	S	A		33.590
JP00323	M	S	A		14.961
JP00324	M	S	A		24.863
JP00325		S	A		Period: Jun-17-2007 - Jun-29-2007
JP00326	M	S	A		19.435
JP00327	M	S	A		27.015
JP00328	M	S	A		Identifiers: G.U.C. Lehmann, Jaakko L.O. Pohjoismaeki, Host: Poeciloman mariannae G.U.C. Lehmann det.
JP00329	F	S	A		Identifiers: G.U.C. Lehmann, Jaakko L.O. Pohjoismaeki, Host: Poeciloman mariannae G.U.C. Lehmann det.
JP00330		S	A		Period: Jul-12-2007 - Jul-29-2007
JP00331	M	S	A		Period: May-22-2009 - May-26-2009: mal. trap
JP00332	M	S	A
JP00333	F	S	A
JP00334	M	S	A
JP00335	M	S	A
JP00336	F	S	A
JP00337	F	S	A
JP00338		S	A		Species: Gymnosoma costatum/intermedium
JP00339	M	S	A
JP00340	M	S	A
JP00341	M	S	A
JP00342	M	S	A
JP00343		S	A
JP00344		S	A
JP00345	F	S	A
JP00346		S	A
JP00347		S	A
JP00348	M	S	A
JP00349		S	A
JP00350		S	A
JP00351		S	A
JP00352		S	A
JP00353		S	A
JP00354		S	A
JP00355		S	A
JP00356		S	A
JP00357		S	A
JP00358		S	A
JP00359		S	A
JP00360		S	A
JP00361		S	A
JP00362		S	A
JP00363		S	A
JP00364		S	A
JP00365		S	A
JP00366		S	A
JP00367	F	S	A
jka09-05298	M	S	A
JKA12-0931	M	S	A		Identifiers:J. Kahanpaeae, C. Bergstroem
jka09-04981	M	S	A
jka07-05559	F	S	A
jka07-05568	F	S	A
JKA12-0933	M	S	A
jka-05-02928	M	S	A
JKA12-0932	M	S	A
jka-05-00451	F	S	A
jka08-00455	M	S	A
JKA12-0935	M	S	A
jka09-05729	F	S	A
jka07-04541	F	S	A
jka06-00525	F	S	A
jka07-04405	M	S	A
jka10-00117	M	S	A
jka09-05552	M	S	A
jka06-01234	M	S	A
jka06-01300	F	S	A
jka07-05432	F	S	A
JKA12-0936	F	S	A
JKA12-0937	F	S	A
jka06-02329	F	S	A
jka09-04283	F	S	A
jka08-00016	F	S	A
jka10-02702		S	A
JKA12-0938	F	S	A
JKA12-0939	F	S	A
jka-05-02998	M	S	A
jka10-03381		S	A
jka-05-02092	F	S	A
JKA12-0940	M	S	A
JKA12-0941	F	S	A
jka10-02193		S	A
JKA12-0942	F	S	A
JKA12-0943	M	S	A
jka-05-03818	F	S	A
JKA12-0944	F	S	A
JKA12-0945	M	S	A		niitty
jka06-00105	F	S	A
JKA12-0946	F	S	A		::taxonomy:Was identified as Gonia ornata. Assingned as picea due to COI. Has enough dusting to be a dark form of ornata!::endTaxonomy:raeme
JKA12-0947	M	S	A
jka-05-03941	M	S	A
jka-05-02972	M	S	A
jka07-05418	F	S	A
jka06-01288	F	S	A
JKA12-0948	M	S	A
JKA12-0949	M	S	A
jka07-03019	M	S	A
jka07-07207	F	S	A
jka07-06244	F	S	A
jka07-05442	M	S	A
jka07-07109	M	S	A
JKA12-0950	M	S	A
jka07-05400	F	S	A
JKA12-0951	M	S	A
jka10-02053		S	A
jka08-00018	M	S	A
JKA12-0952	F	S	A
jka06-00769	M	S	A
jka10-00738	F	S	A
JKA12-0953	M	S	A
jka10-00231	F	S	A
JKA12-0954	F	S	A
jka06-02728	M	S	A
jka06-02284	F	S	A
jka09-04687	F	S	A
jka06-00491	F	S	A
JKA12-0955	M	S	A
JKA12-0956	F	S	A
jka07-06830	M	S	A		::taxonomy:Identified as boreata by Christer Bergstroem. Seems to be a dark knee form of pauciseta. Antenna too short for boreata male and not widened apically!::endTaxonomy:
jka07-01818	M	S	A		::taxonomy:Identified as boreata by Christer Bergstroem. Seems to be dark knee form of pauciseta.::endTaxonomy:
JKA12-0957	M	S	A		Identifiers:J. Kahanpaeae, Stig Andersen
jka07-04069	F	S	A		::taxonomy:Identified as boreata by Christer Bergstroem::endTaxonomy:
jka06-02381	F	S	A
jka09-05832	M	S	A
jka06-00482	F	S	A
jka-05-00342	F	S	A
JKA12-0958	M	S	A		Identifiers:J. Kahanpaeae, Stig Andersen
JKA12-0959	M	S	A
jka07-06566	F	S	A		variata?
jka06-00334	F	S	A
jka06-02638	M	S	A
JKA12-0960	M	S	A		Identifiers:J. Kahanpaeae, Stig Andersen
jka06-02375	F	S	A
jka06-02692	F	S	A
jka06-01416	M	S	A
jka07-03528	M	S	A
jka06-00799	F	S	A
jka-05-04538	F	S	A
JKA12-0961	F	S	A		kuivaketo
jka07-06463	F	S	A
JKA12-0962	F	S	A		Identifiers:J. Kahanpaeae, C. Bergstroem
jka07-01836	F	S	A
jka-05-00258	F	S	A
JKA12-0965	F	S	A
jka-05-03391	F	S	A
JKA12-0966	F	S	A
JKA12-0964	F	S	A
jka-05-03360	M	S	A
jka-05-00763	F	S	A
JKA12-0963	F	S	A		Joutomaa-alue Identifiers:J. Kahanpaeae, C. Bergstroem
jka07-03390	F	S	A
jka07-03842	F	S	A
jka07-05555	F	S	A
jka09-05417	M	S	A
jka07-03328	F	S	A		::taxonomy:Was originally identified as inanis::endTaxonomy:
jka10-01368		S	A
jka10-02736		S	A
jka10-02151		S	A
JKA12-0967	M	S	A
JKA12-0968	F	S	A		Hiekkakuoppa
jka06-01776	F	S	A
JKA12-0969	F	S	A
jka06-01153	M	S	A
jka10-02269		S	A
JKA12-0971	M	S	A
jka10-02524		S	A
JKA12-0972	F	S	A
jka10-02249		S	A
jka08-00014	F	S	A
jka10-02208	F	S	A
jka08-00649	F	S	A
jka-05-00788	M	S	A
jka06-00285	M	S	A
jka06-00502	M	S	A
jka08-00075	M	S	A
JKA12-0974	F	S	A
JKA12-0975	F	S	A		Joutomaa-alue
jka-05-02932	M	S	A
JKA12-0978	F	S	A		Open meadow Identifiers:J. Kahanpaeae, C. Bergstroem
JKA12-0980	M	S	A
JKA12-0981	M	S	A		Identifiers:J. Kahanpaeae, Stig Andersen
jka06-01317	M	S	A
JP00601	F	S	A
JP00602		S	A
JP00603	F	S	A		Period: Jul-24-2007 - Sep-03-2007
JP00604		S	A
JP00605		S	A
JP00606		S	A
JP00607		S	A
JP00608	F	S	A		Label 0329
JP00609		S	A		Period: Jul-14-2005 - Jul-27-2005
JP00610		S	A
JP00611		S	A
JP00612		S	A		Period: Jun-30-2008 - Jul-27-2008
JP00613		S	A		Period: Jul-15-1999 - Jul-21-1999: Valorysae
JP00614		S	A
JP00615		S	A
JP00616		S	A
JP00617		S	A		Label 1303: RN 66371/15998
JP00618		S	A		Period: Jul-27-2005 - Aug-12-2005
JP00619		S	A		Period: Jun-29-2007 - Jul-12-2007
JP00620		S	A		Period: Jul-09-2006 - Aug-12-2006
JP00621		S	A		Period: Jun-06-2008 - Jul-24-2008
JP00622		S	A		Period: Jun-06-2008 - Jul-24-2008
JP00623		S	A		Period: Jul-09-2006 - Aug-12-2006
JP00624		S	A		Period: Jun-16-2005 - Jul-12-2005
JP00625		S	A		Period: Jul-09-2006 - Aug-12-2006
JP00626		S	A		Period: Jul-15-2005 - Jul-28-2005
JP00627		S	A		Period: Jul-12-2000 - Aug-07-2000
JP00628		S	A
JP00629		S	A
JP00630		S	A		Period: Jul-22-2003 - Aug-21-2003
JP00631		S	A		Period: Jul-22-2003 - Aug-21-2003
JP00632	M	S	A		Period: Jun-19-2005 - Jun-25-2005: Malaise
JP00633	M	S	A		Period: Jun-27-2005 - Jun-30-2005
JP00634	F	S	A
JP00635	M	S	A
JP00636	M	S	A
JP00637		S	A
JP00638		S	A
JP00639	M	S	A
JP00640	M	S	A
JP00641	M	S	A
JP00642	M	S	A		Label 2295: RN 65789/314100
JP00643	M	S	A		Period: May-22-2005 - Jun-19-2005
JP00644		S	A
JP00645		S	A
JP00646	M	S	A
JP00647	F	S	A
JP00648	F	S	A		Period: Jun-27-2005 - Jun-30-2005
JP00649		S	A		Period: Jul-12-2007 - Jul-29-2007
JP00650	M	S	A		Period: Jul-12-2005 - Aug-02-2005
JP00651	F	S	A
JP00652		S	A
JP00653	F	S	A		Period: Jul-12-2005 - Aug-02-2005
JP00654	F	S	A		Period: May-22-2005 - Jun-19-2005
JP00655		S	A
JP00656		S	A
JP00657		S	A
JP00658		S	A		ex Saperda populnea
JP00659		S	A
JP00660		S	A
JP00661		S	A
JP00662		S	A
JP00663		S	A
JP00664		S	A		Period: Jul-15-2005 - Jul-28-2005
JP00665		S	A		Period: May-25-2008 - Jun-30-2008
JP00666		S	A
JP00667		S	A		Period: Jun-17-2007 - Jun-29-2007
JP00668		S	A
JP00669		S	A
JP00670		S	A
JP00671		S	A		Period: Jun-17-2007 - Jun-29-2007
JP00672		S	A		Period: May-07-2008 - Jun-06-2008
JP00673		S	A		Period: May-17-2008 - Jun-19-2008
JP00674		S	A		Period: Jul-12-2000 - Aug-07-2000
JP00675		S	A		Period: Jul-12-2000 - Aug-07-2000
JP00676		S	A		Period: May-26-2007 - Jun-17-2007
JP00677		S	A		May-09-2007 - May-12-2007: ex Noctuidae ex Pupa
JP00678		S	A		Period: Jul-24-2007 - Sep-03-2007
JP00679		S	A
JP00680		S	A		Period: 2007-2008: e Noctuidae larva on Betula pubescens
JP00681		S	A		Period: Jul-12-2007 - Jul-29-2007
JP00682		S	A
JP00683		S	A
JP00684		S	A
JP00685		S	A
JP00686		S	A
JP00687		S	A
JP00688		S	A
JP00689		S	A
JP00690		S	A		f.1
JP00691		S	A		f.2
JP00692		S	A		f.2
JP00693		S	A		Period: Jun-11-2006 - Jun-23-2006
JP00694		S	A		Period: Jun-11-2006 - Jun-23-2006
JP00695		S	A
JP00701		S	A
JP00702		S	A
JP00703		S	A
JP00704		S	A
JP00705		S	A
JP00706		S	A
JP00707		S	A		Period: Jul-23-2009 - Aug-09-2009
JP00708		S	A
JP00709		S	A
JP00710		S	A
JP00711		S	A
JP00712		S	A
JP00713		S	A
JP00714		S	A
JP00715		S	A
JP00716		S	A
JP00717		S	A		Collection Date: 5.2012: e.l. Arctia caja
JP00718		S	A
JP00719		S	A		Period: Jul-26-2007 - Sep-04-2007
JP00720		S	A		Period: Jul-26-2007 - Aug-29-2007
JP00721		S	A
JP00722		S	A
JP00723		S	A		Period: Aug-02-2007 - Sep-01-2007
JP00724		S	A
JP00725	M	S	A
JP00726		S	A
JP00727		S	A
JP00728		S	A
JP00729		S	A
JP00730	M	S	A
JP00731		S	A
JP00733		S	A
JP00734		S	A
JP00735		S	A
JP00736		S	A		On own label: 6
JP00737		S	A
JP00738		S	A		On own label: 10
JP00739		S	A		On own label: 1
JP00740		S	A		Period: Jun-19-2005 - Jul-12-2005: Malaise
JP00741		S	A		Period: May-15-2007 - Jun-29-2007
JP00742		S	A		Period: Jun-19-2005 - Jul-12-2005
JP00743		S	A
JP00744		S	A
JP00745		S	A
JP00746		S	A
JP00747		S	A
JP00748		S	A
JP00749		S	A
JP00750		S	A		On own label: 5: Period: Aug-23-2011 - Aug-25-2011
JP00751		S	A
JP00752		S	A
JP00753		S	A
JP00754		S	A
JP00755		S	A
JP00756		S	A
JP00757		S	A
JP00758		S	A
JP00759		S	A
JP00760		S	A
JP00761		S	A
JP00762		S	A
JP00763		S	A
JP00764		S	A
JP00765		S	A
JP00766		S	A
JP00767		S	A
JP00768		S	A
JP00769		S	A
JP00770		S	A
JP00771		S	A
JP00772		S	A
JP00773		S	A		Period: May-25-2012 - May-28-2012
JP00774		S	A		Period: Aug-13-2012 - Aug-19-2012
JP00775		S	A
JP00776		S	A		::taxonomy:Placed in this species based on yellow 2nd antenna segment, black tegula and short antennae.::endTaxonomy:On own label: 8: Siphona sp. 1
JP00777		S	A		Siphona sp. 2
JP00778		S	A		Period: Jun-19-2005 - Jul-12-2005: Old JP00047
JP00779		S	A		Period: May-26-2007 - Jun-17-2007: Old JP00032
JP00780		S	A		Period: Aug-02-2007 - Sep-01-2007: Old JP00263
JP00781		S	A		Old JP00266
JP00782		S	A		Old JP00267
JP00783		S	A		Period: Jul-22-2003 - Aug-21-2003: Old JP00268
JP00784		S	A		Old JP00222
JP00785		S	A		Old JP00247
JP00786		S	A
JP00787		S	A
JP00788		S	A
JP00789		S	A		Collection Date: 5.2012: e.l. Arctia caja
JP00790		S	A
JP00791		S	A
JP00792		S	A
JP00793		S	A
JP00794		S	A		Collection Date: e. l. 1985: Old JP00121
JP00795	M	S	A		Farbschale gelb K100: Old JP00128
JP00501		S	A
JP00502		S	A		Period: May-08-2006 - May-31-2006
JP00503		S	A
JP00504		S	A
JP00505		S	A		Period: May-08-2006 - May-31-2006
JP00506		S	A		Period: Jul-12-2000 - Aug-07-2000
JP00507		S	A
JP00508		S	A
JP00509		S	A		Collection Date: e.l. 2005: Diprion pini: University of Jyvaeskylae
JP00510		S	A
JP00511		S	A
JP00512		S	A		Period: Jul-15-2005 - Jul-28-2005
JP00513		S	A
JP00514		S	A		Rehevaen metsaen ja pellon reunavyoehyke pyydystetty kaesin vuohenputken kukilta
JP00515		S	A
JP00516		S	A
JP00517		S	A
JP00518		S	A
JP00519		S	A		Collection Date: 2007: E. larva S. ligustri
JP00520		S	A
JP00521		S	A
JP00522		S	A
JP00523		S	A
JP00524		S	A
JP00525		S	A		Collection Date: E. O. march 2006
JP00526		S	A
JP00527		S	A		Period: Jul-12-2007 - Jul-29-2007
JP00528		S	A
JP00529		S	A
JP00530		S	A
JP00531	F	S	A
JP00532	M	S	A
JP00533		S	A		Collection Date: e.l. 5.2008: ex pupa
JP00534		S	A
JP00535		S	A
JP00536		S	A
JP00537	M	S	A		Collection Date: e.l. 2005
JP00538		S	A
JP00539	M	S	A
JP00540	M	S	A
JP00541		S	A
JP00542		S	A
JP00543		S	A
JP00544		S	A
JP00545		S	A
JP00546		S	A		Haavilla karhunputken kukinnolta, pieni niitty urheilukentaen vieressae
JP00547	M	S	A
JP00548		S	A
JP00549		S	A
JP00550		S	A
JP00551		S	A
JP00552		S	A
JP00553	M	S	A		Period: Jun-11-2006 - Jun- 23-2006
JP00554	M	S	A
JP00555	M	S	A		Period: Jul-16-2004 - Jul-18-2004
JP00556		S	A
JP00557		S	A
JP00558		S	A		Period: Jul-15-2005 - Jul-28-2005
JP00559		S	A
JP00560		S	A
JP00561		S	A
JP00562		S	A
[truncated: 314 more rows]

## Sheet: Collection Data
Sample ID	Collectors	Collection Date	Country/Ocean	State/Province	Region	Sector	Exact Site	Lat	Lon	GenBank accession
[truncated: 1,136 more rows]
